# Supplementary material for: The N-Alkylation of Agelastatin A Modulates Its Chemical Reactivity
Source: MDPI journal article supplement (doi:10.3390/molecules28196821), 2023-09-27
Supplement: s1 [file s1]

# The *N*-Alkylation of Agelastatin A Modulates Its Chemical Reactivity

Michele D'Ambrosio

*Laboratory of Bioorganic Chemistry, Department of Physics*

*Università degli Studi di Trento*

*Via Sommarive 14, 38123 Trento, Italy*

Correspondence should be addressed to: [michele.dambrosio@unitn.it](mailto:michele.dambrosio@unitn.it)

**Figure S1. Proposed arbitrary numbering:**

Arbitrary numbering is required to designate the many derivatives of agelastatin A. This arbitrary numbering meets the following criteria: **1)** never use a letter that also represents an element symbol; **2)** a number identifies the multiplicity of the C4-C5 bond, the absolute configuration (4*S*, 5*S*) and the substituent group at the C5 oxygen; **3)** a possible apostrophe indicates the opposite configuration (4*R*, 5*R*) ; **4)** a letter establishes the number and position of the methyl groups at the nitrogen N1, N3 and N9. Three tables exemplify the above rules:

| C4 - C5 bond multiplicity | Single                  |          |                         |           | Double   |
|---------------------------|-------------------------|----------|-------------------------|-----------|----------|
| C4 and C5 configurations  | 4 <i>S</i> , 5 <i>S</i> |          | 4 <i>R</i> , 5 <i>R</i> |           | -        |
| C5-O- substituent         | H                       | Me       | H                       | Me        | -        |
| Adopted numbering         | <b>1</b>                | <b>2</b> | <b>1'</b>               | <b>2'</b> | <b>3</b> |

|            |           |            |            |            |            |            |            |
|------------|-----------|------------|------------|------------|------------|------------|------------|
| <b>1a</b>  | <b>1</b>  | <b>1j</b>  | <b>1t</b>  | <b>1m</b>  | <b>1d</b>  | <b>1z</b>  | <b>1e</b>  |
| <b>1'a</b> | <b>1'</b> | <b>1'j</b> | <b>1't</b> | <b>1'm</b> | <b>1'd</b> | <b>1'z</b> | <b>1'e</b> |
| <b>2a</b>  | <b>2</b>  | <b>2j</b>  | <b>2t</b>  | <b>2m</b>  | <b>2d</b>  | <b>2z</b>  | <b>2e</b>  |
| <b>2'a</b> | <b>2'</b> | <b>2'j</b> | <b>2't</b> | <b>2'm</b> | <b>2'd</b> | <b>2'z</b> | <b>2'e</b> |
| <b>3a</b>  | <b>3</b>  | <b>3j</b>  | <b>3t</b>  | <b>3m</b>  | <b>3d</b>  | <b>3z</b>  | <b>3e</b>  |

| Number of substituents  | Zero     | One |          |          | Two      |          |          | Three    |
|-------------------------|----------|-----|----------|----------|----------|----------|----------|----------|
| Substituted nitrogen(s) | -        | 1   | 3        | 9        | 1,3      | 1,9      | 3,9      | 1,3,9    |
| Designating letter      | <b>a</b> | -   | <b>j</b> | <b>t</b> | <b>m</b> | <b>d</b> | <b>z</b> | <b>e</b> |

**Forty possible derivatives of agelastatin A. Compounds not yet prepared are in blue**

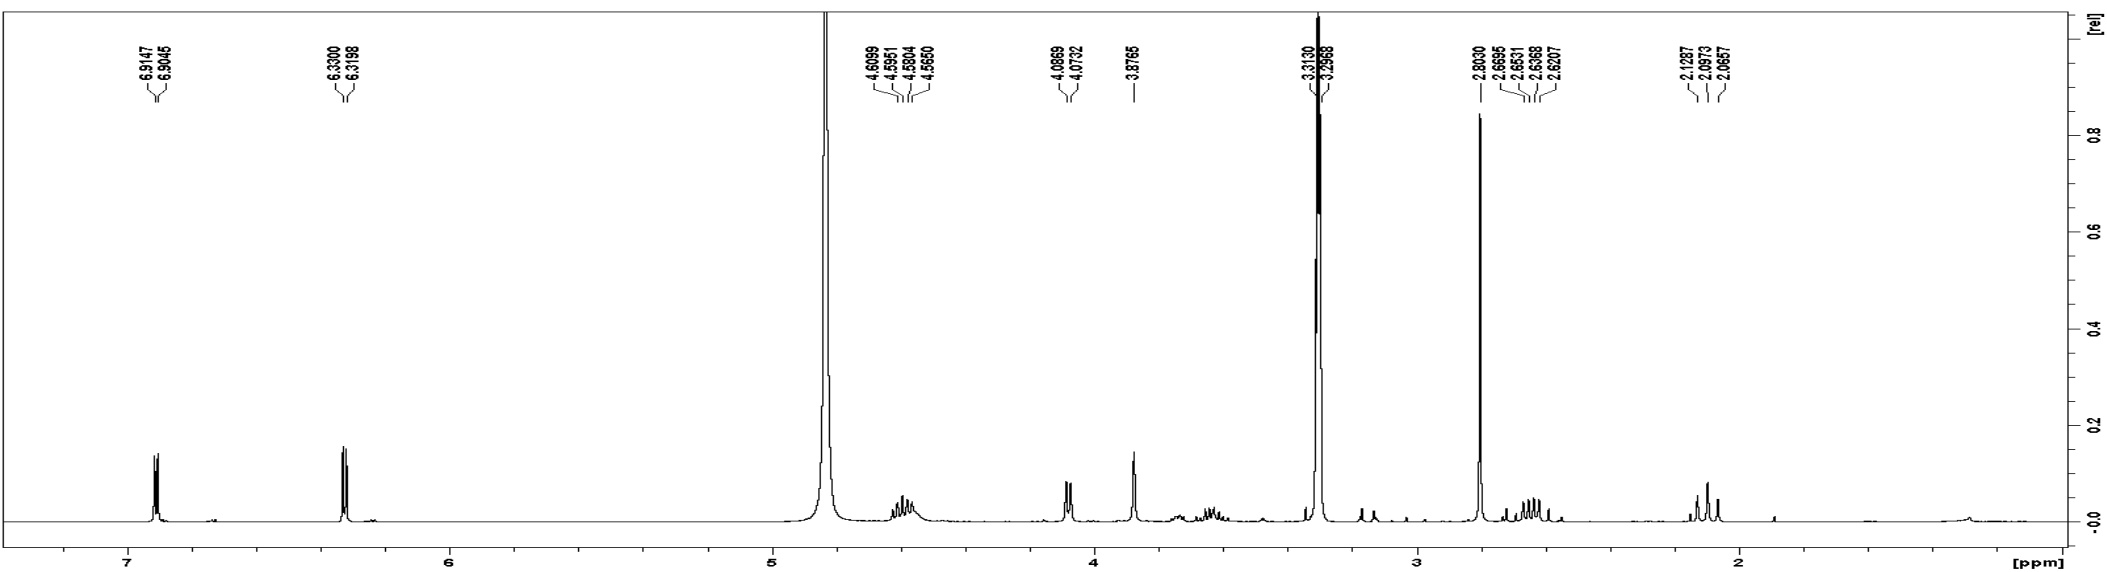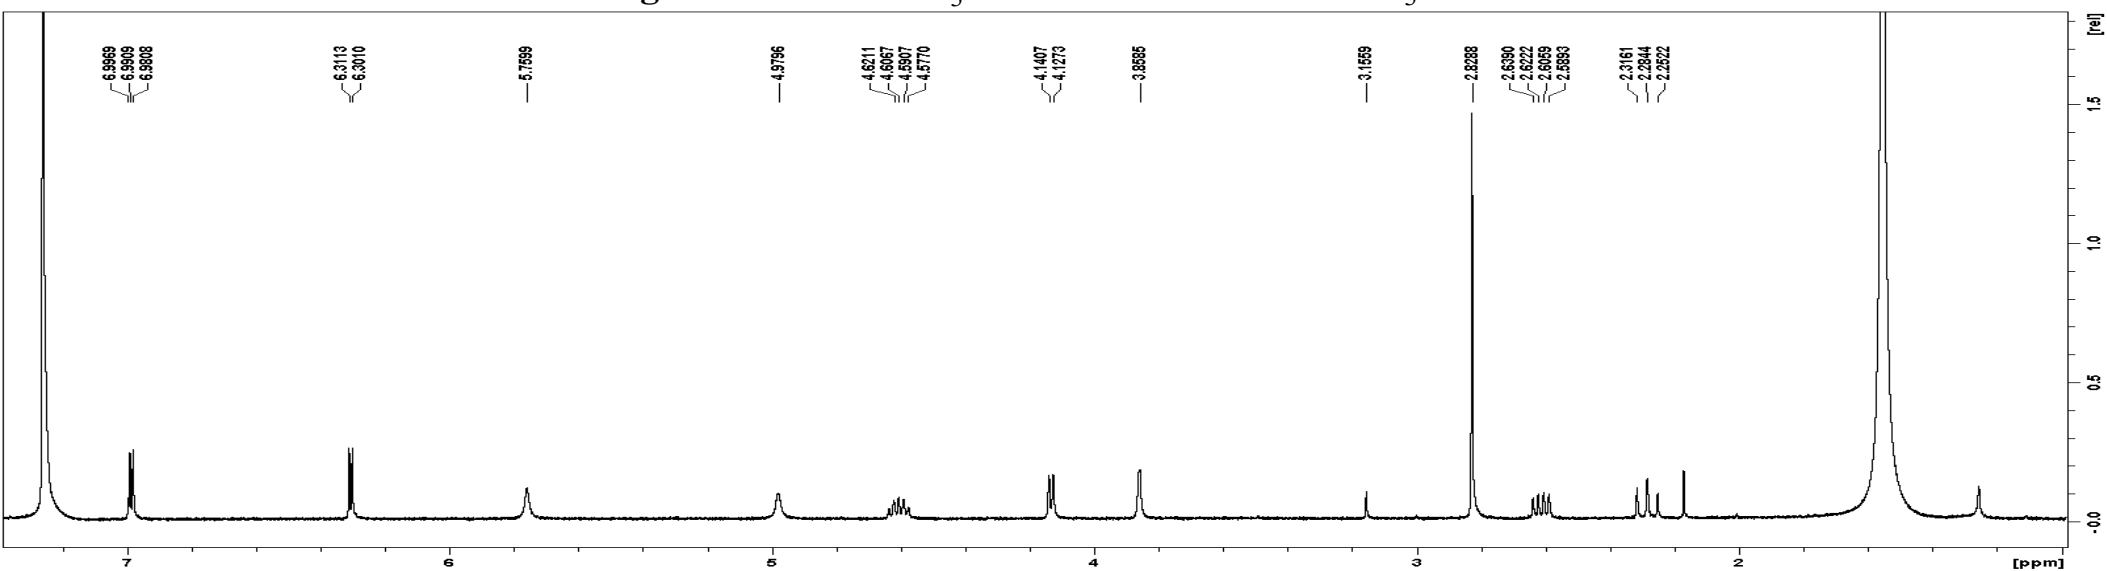

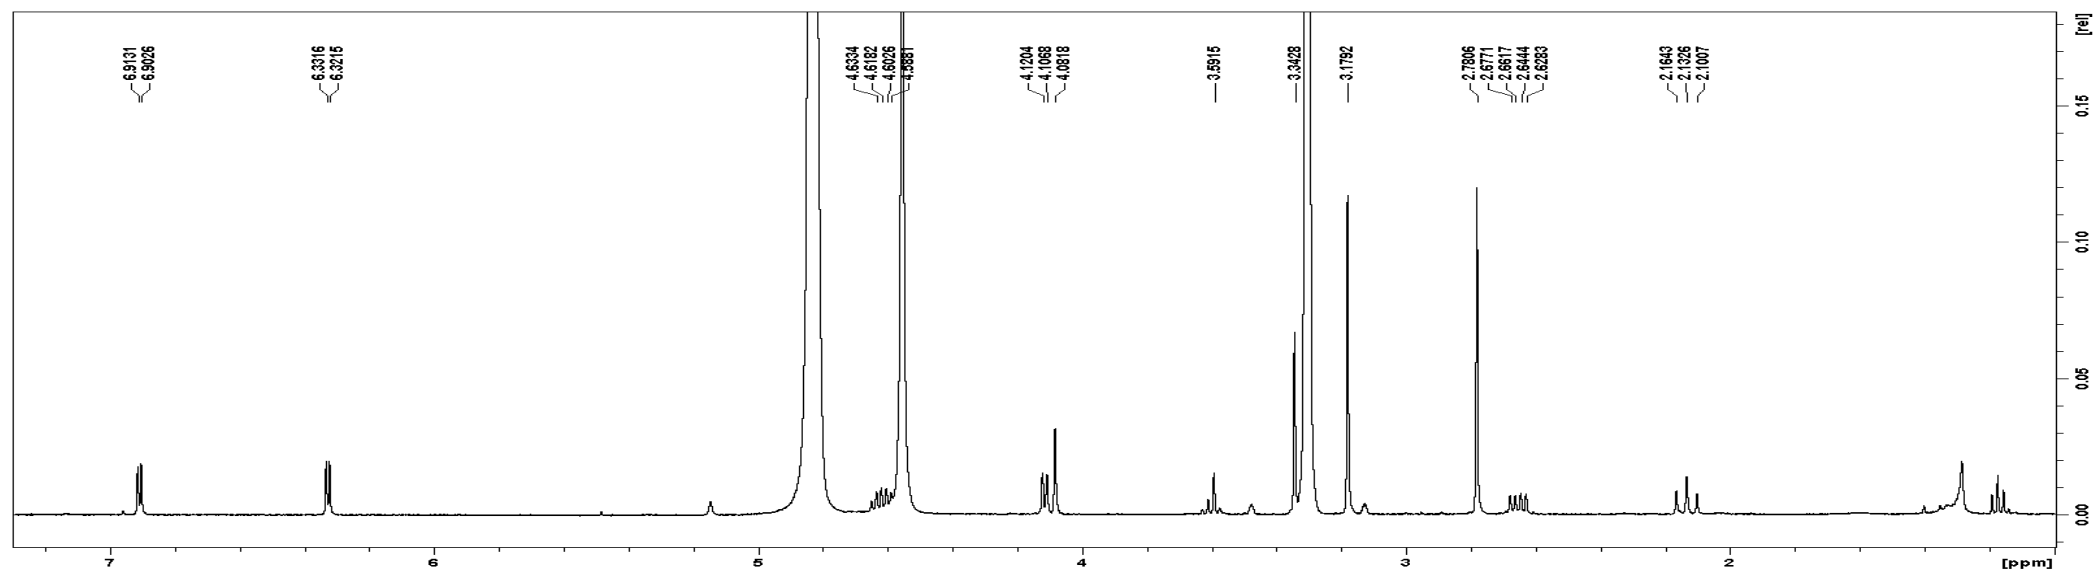

Figure S1b. -  $\uparrow$  -  $\text{CD}_3\text{OD}$       **2**       $\downarrow$  -  $\text{CDCl}_3$

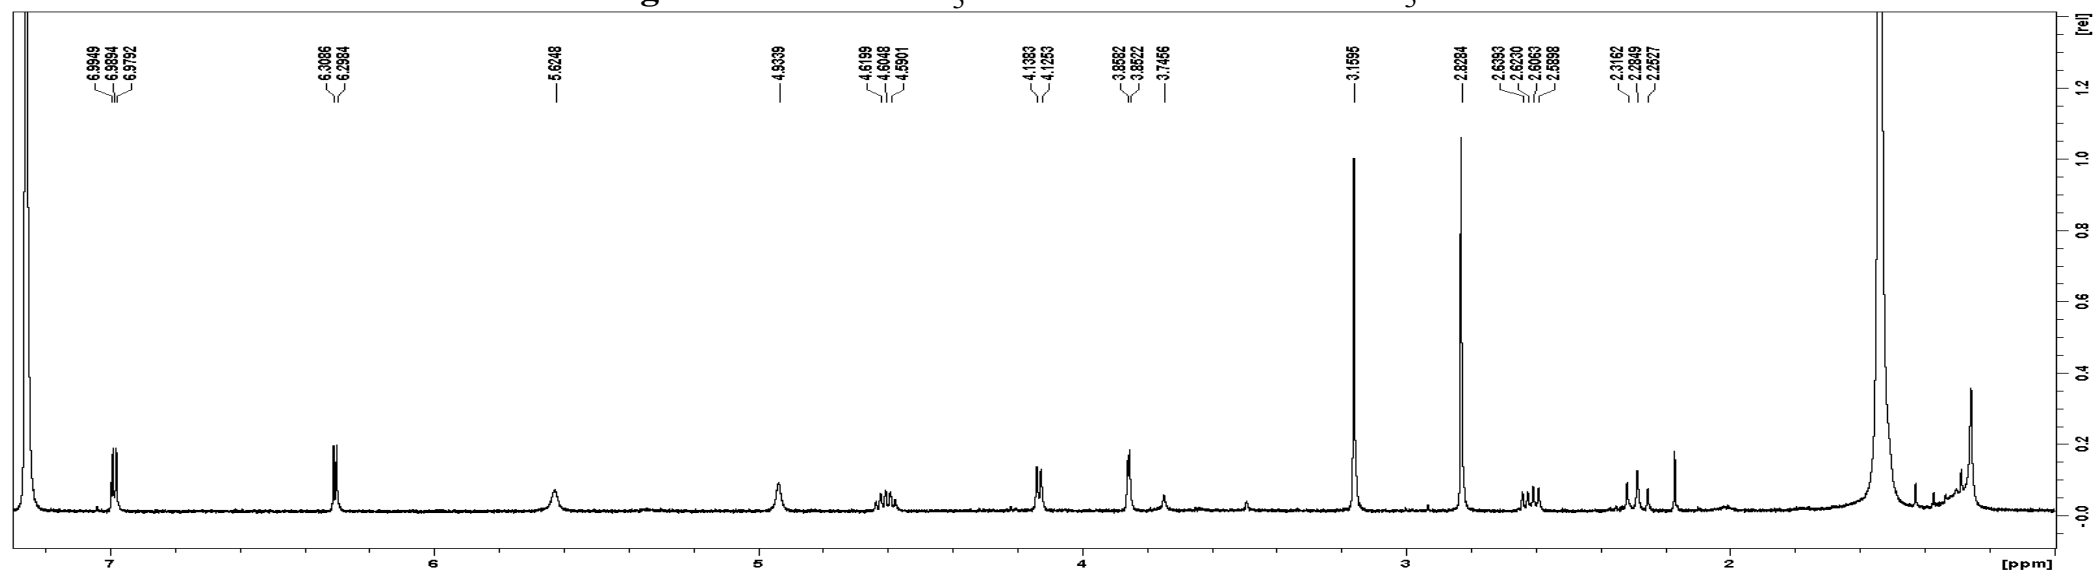



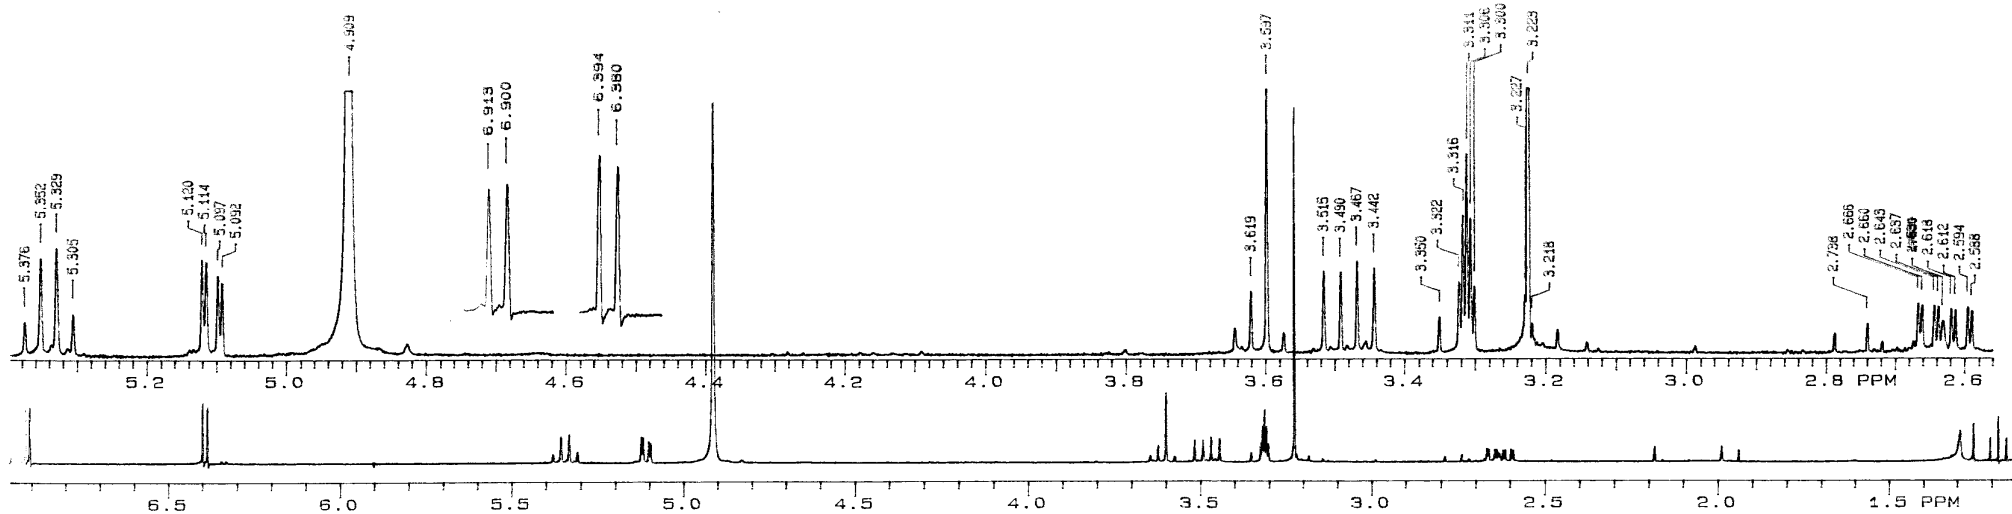

Figure S1c. -  $\uparrow$  - 3 - CD<sub>3</sub>OD

$\downarrow$  - 3e CDCl<sub>3</sub>

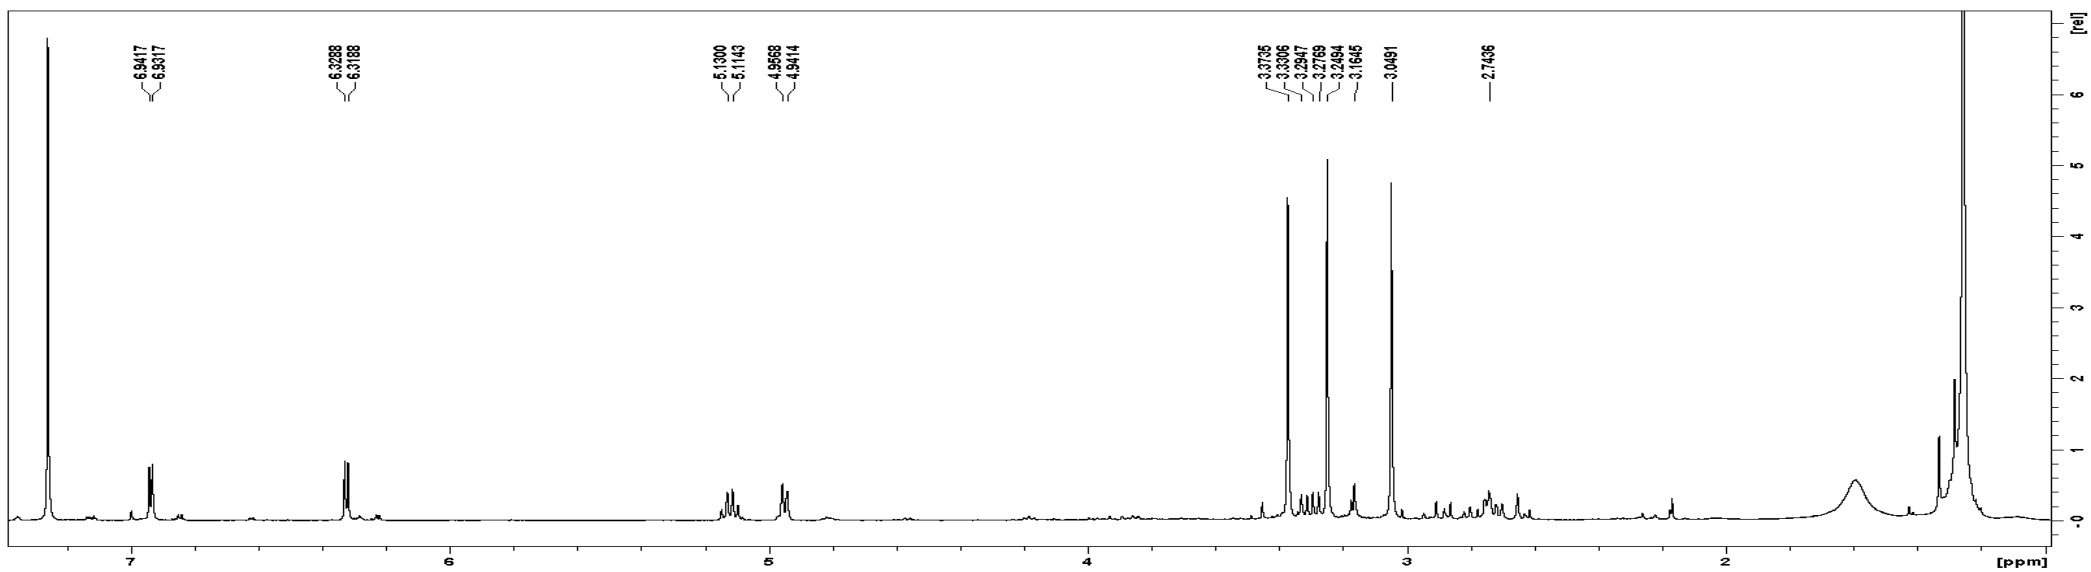

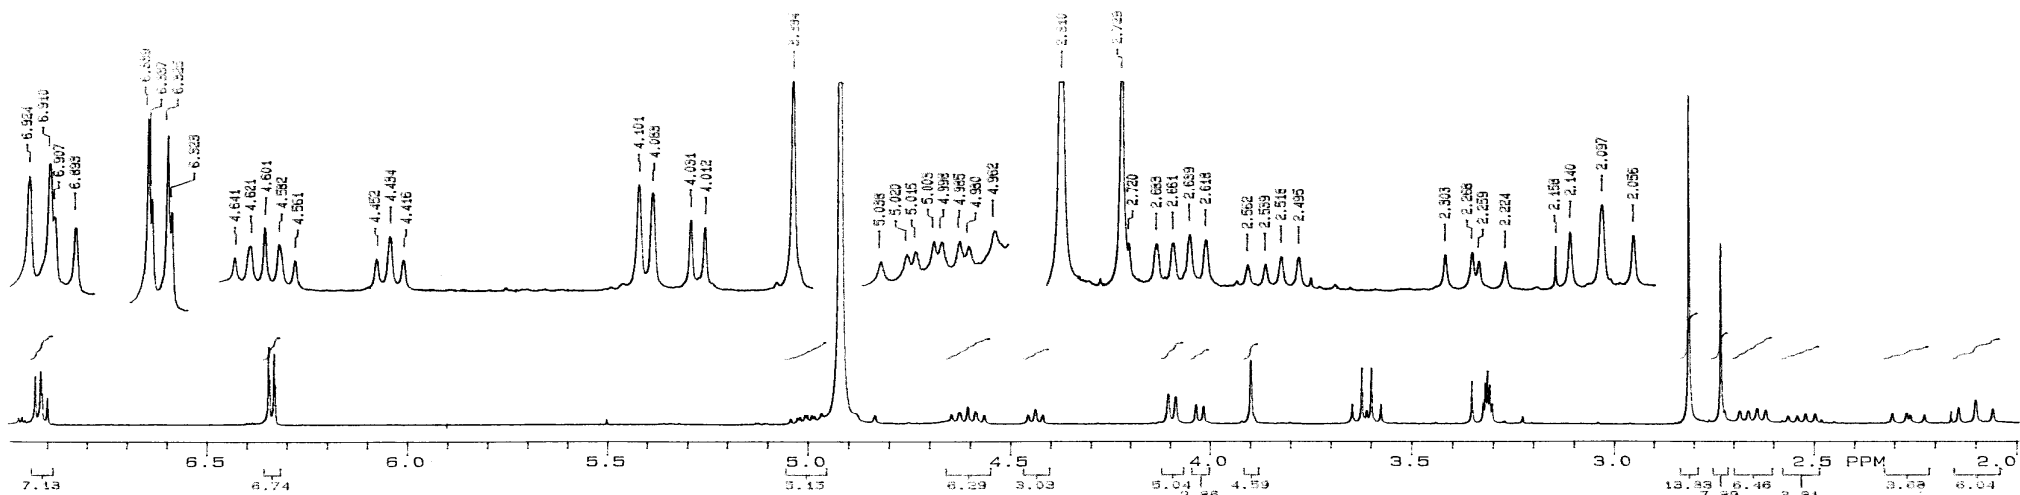

**Figure S1d. -  $\uparrow$  - 1+1' -  $\text{CD}_3\text{OD}$        $\downarrow$  - 2+2' -  $\text{CD}_3\text{OD}$**

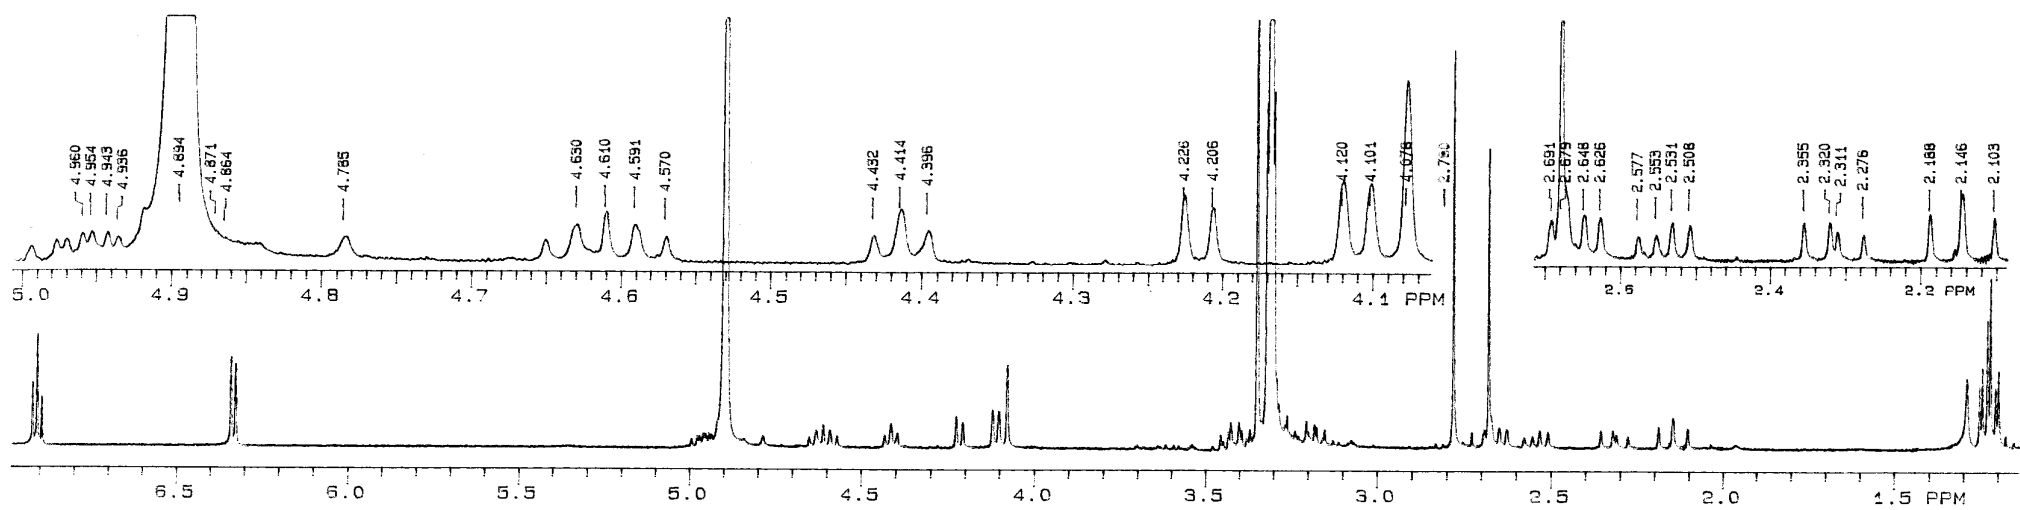

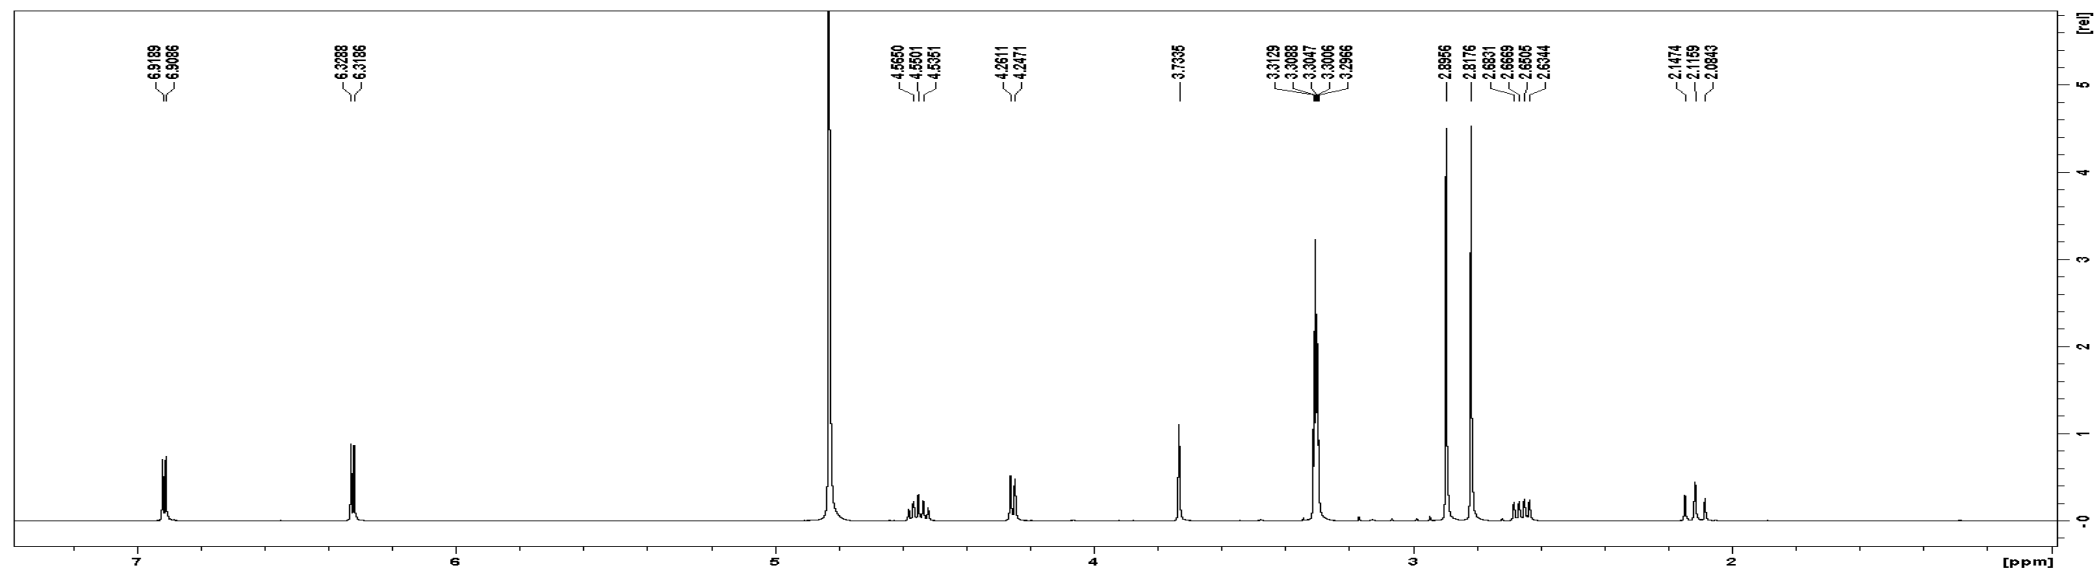

Figure S1e. - ↑ - 1m

↓ - 2m > 2e - CD<sub>3</sub>OD

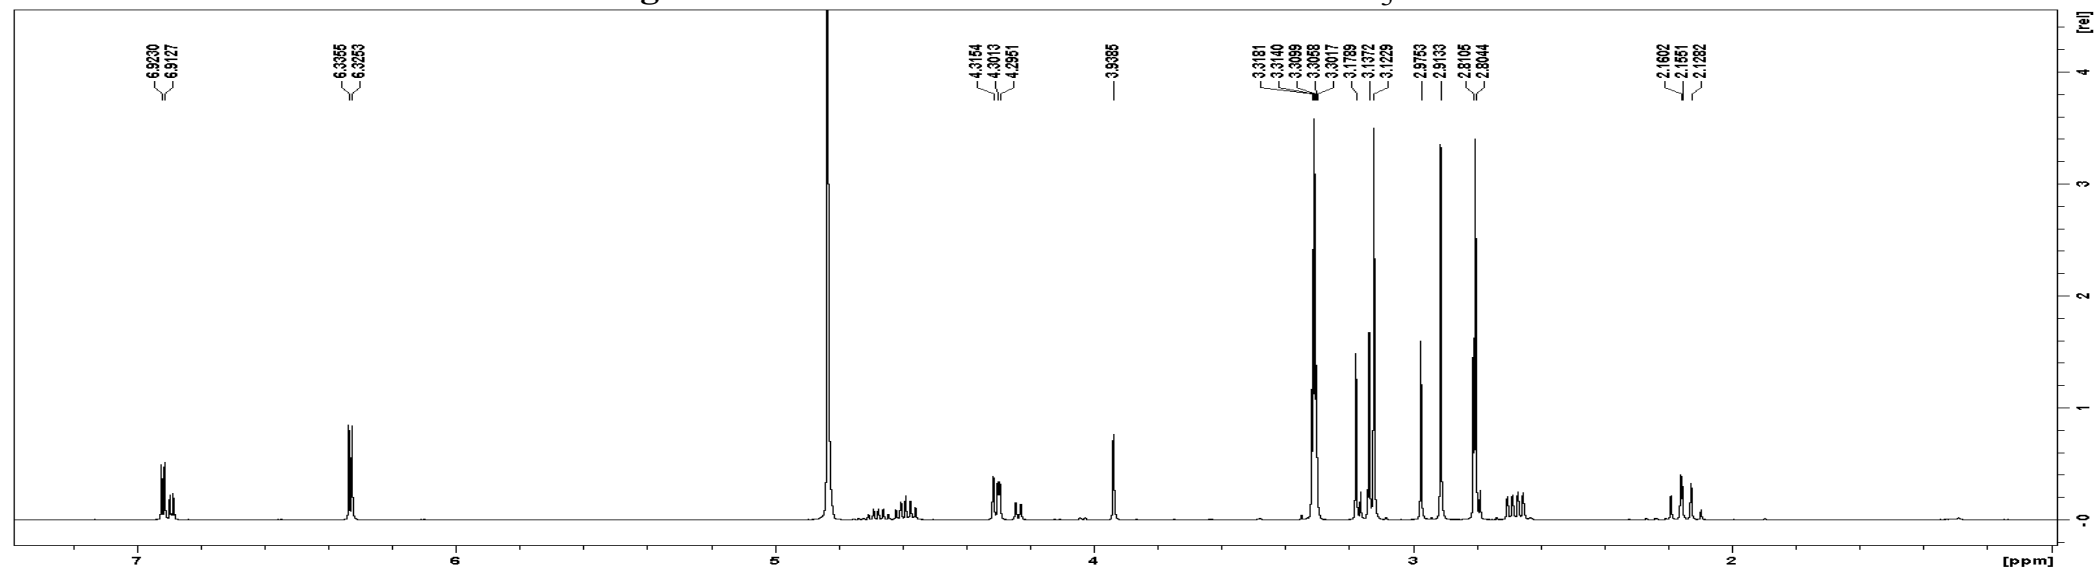

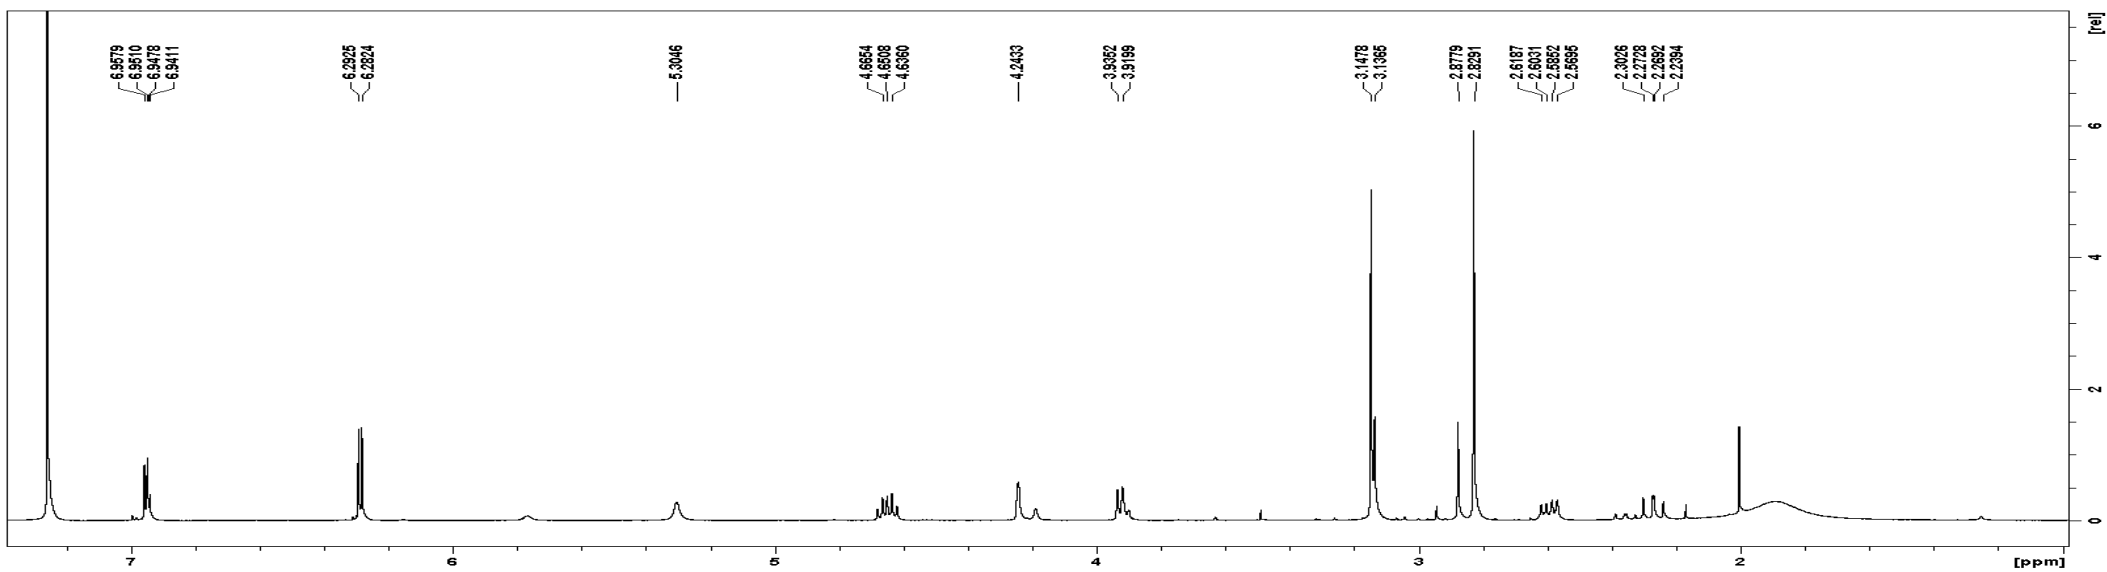

Figure S1f. - ↑ - 1d

↓ - 2d

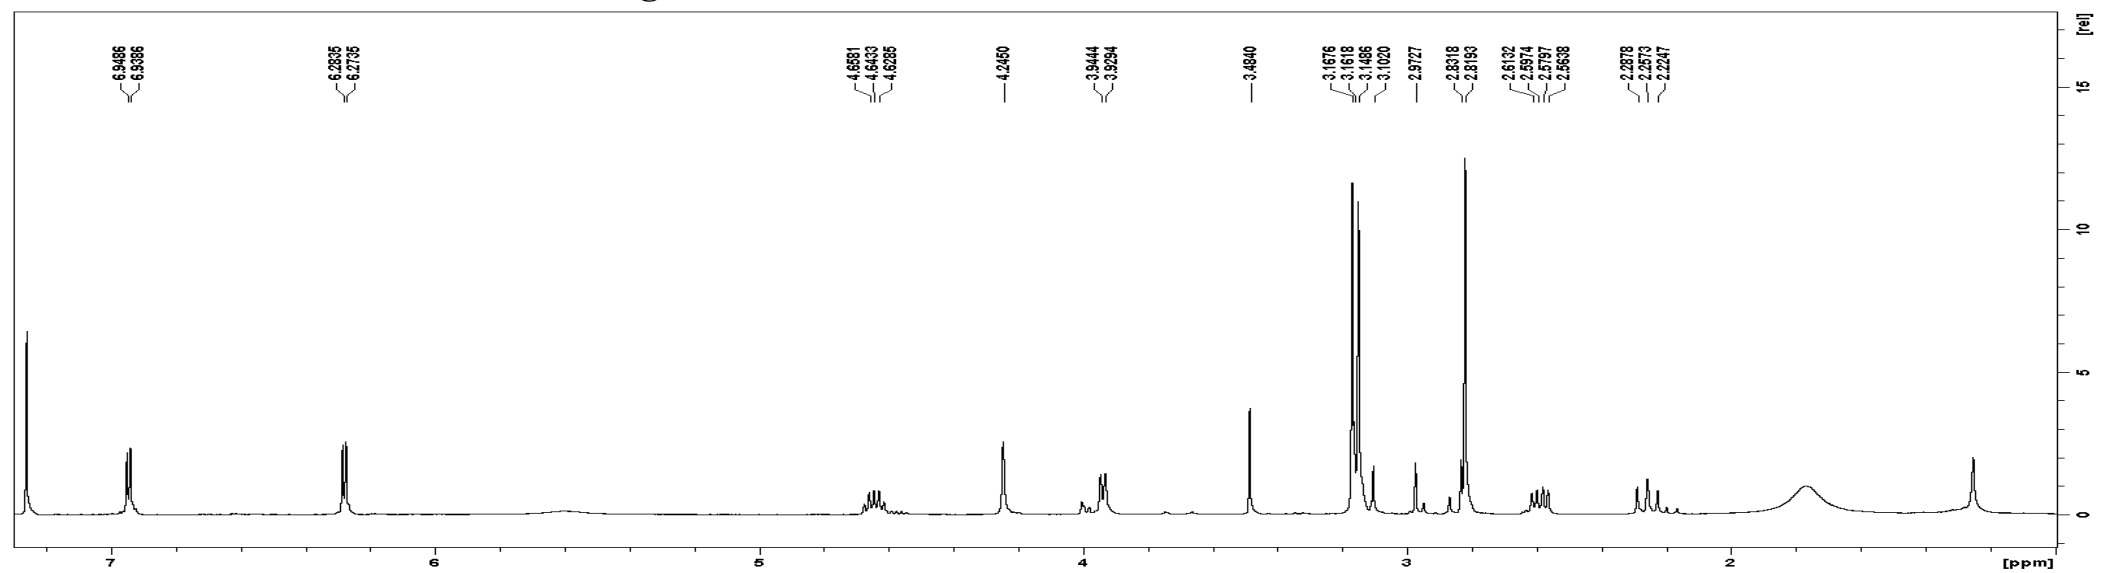

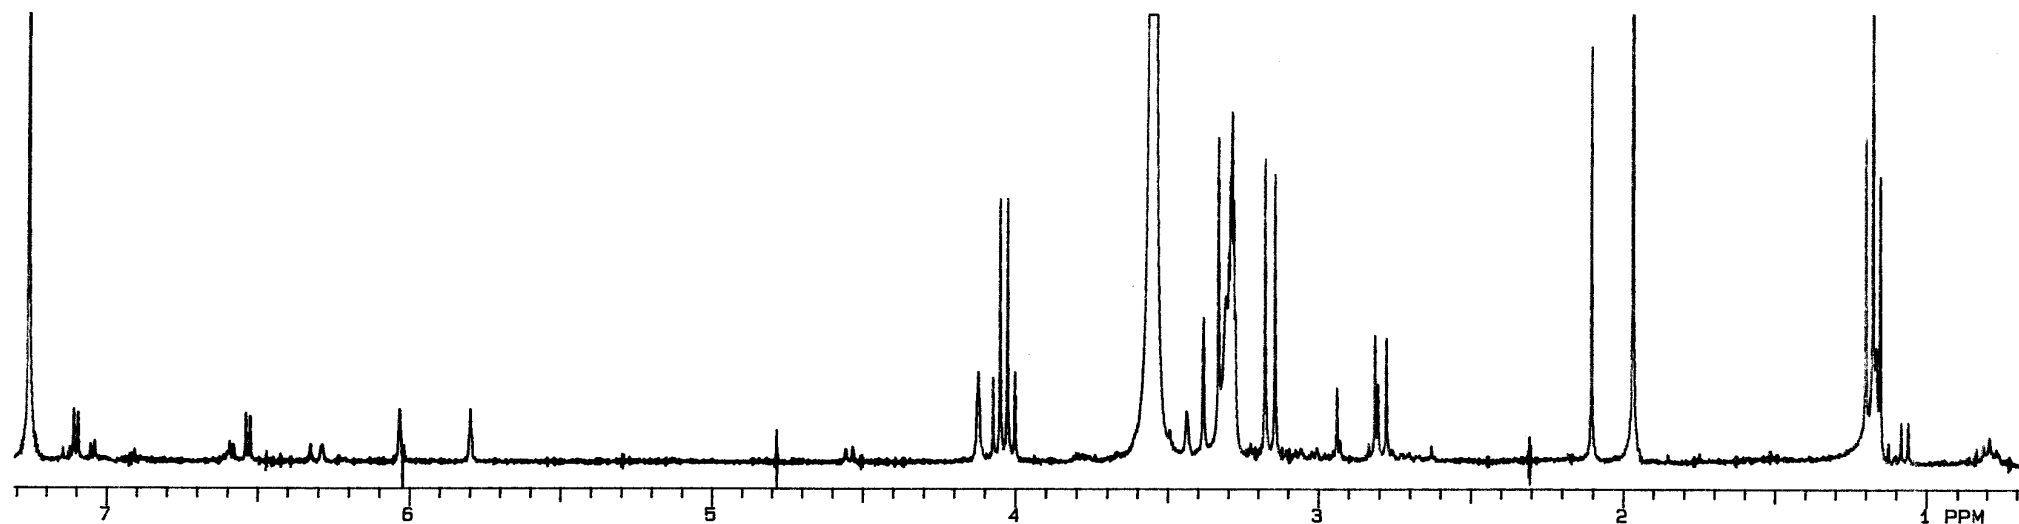

Figure S1g. - ↑ - 4e

CDCl<sub>3</sub> / CD<sub>3</sub>OD 9:1

↓ - 5e

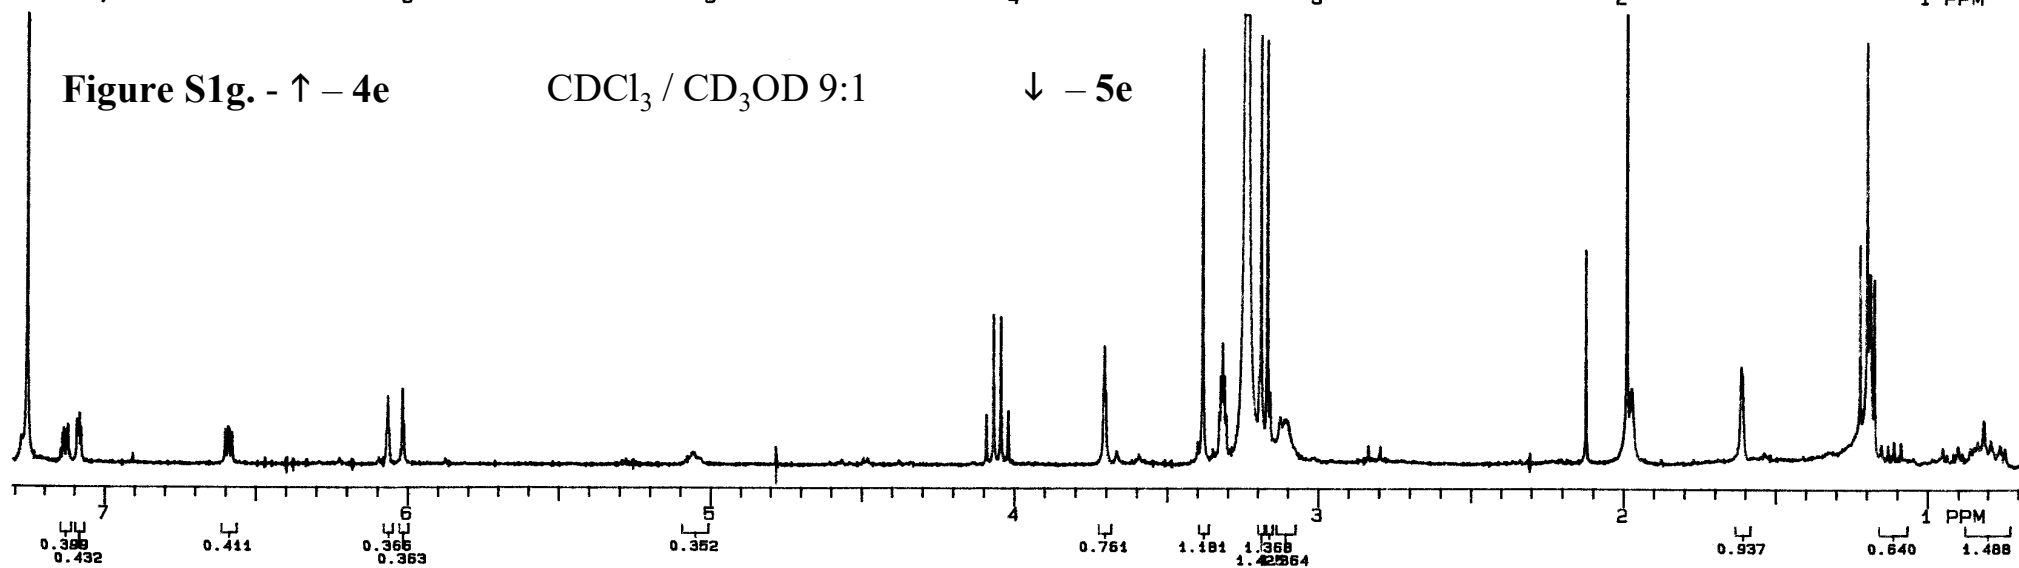

Figure S1h. – 6e

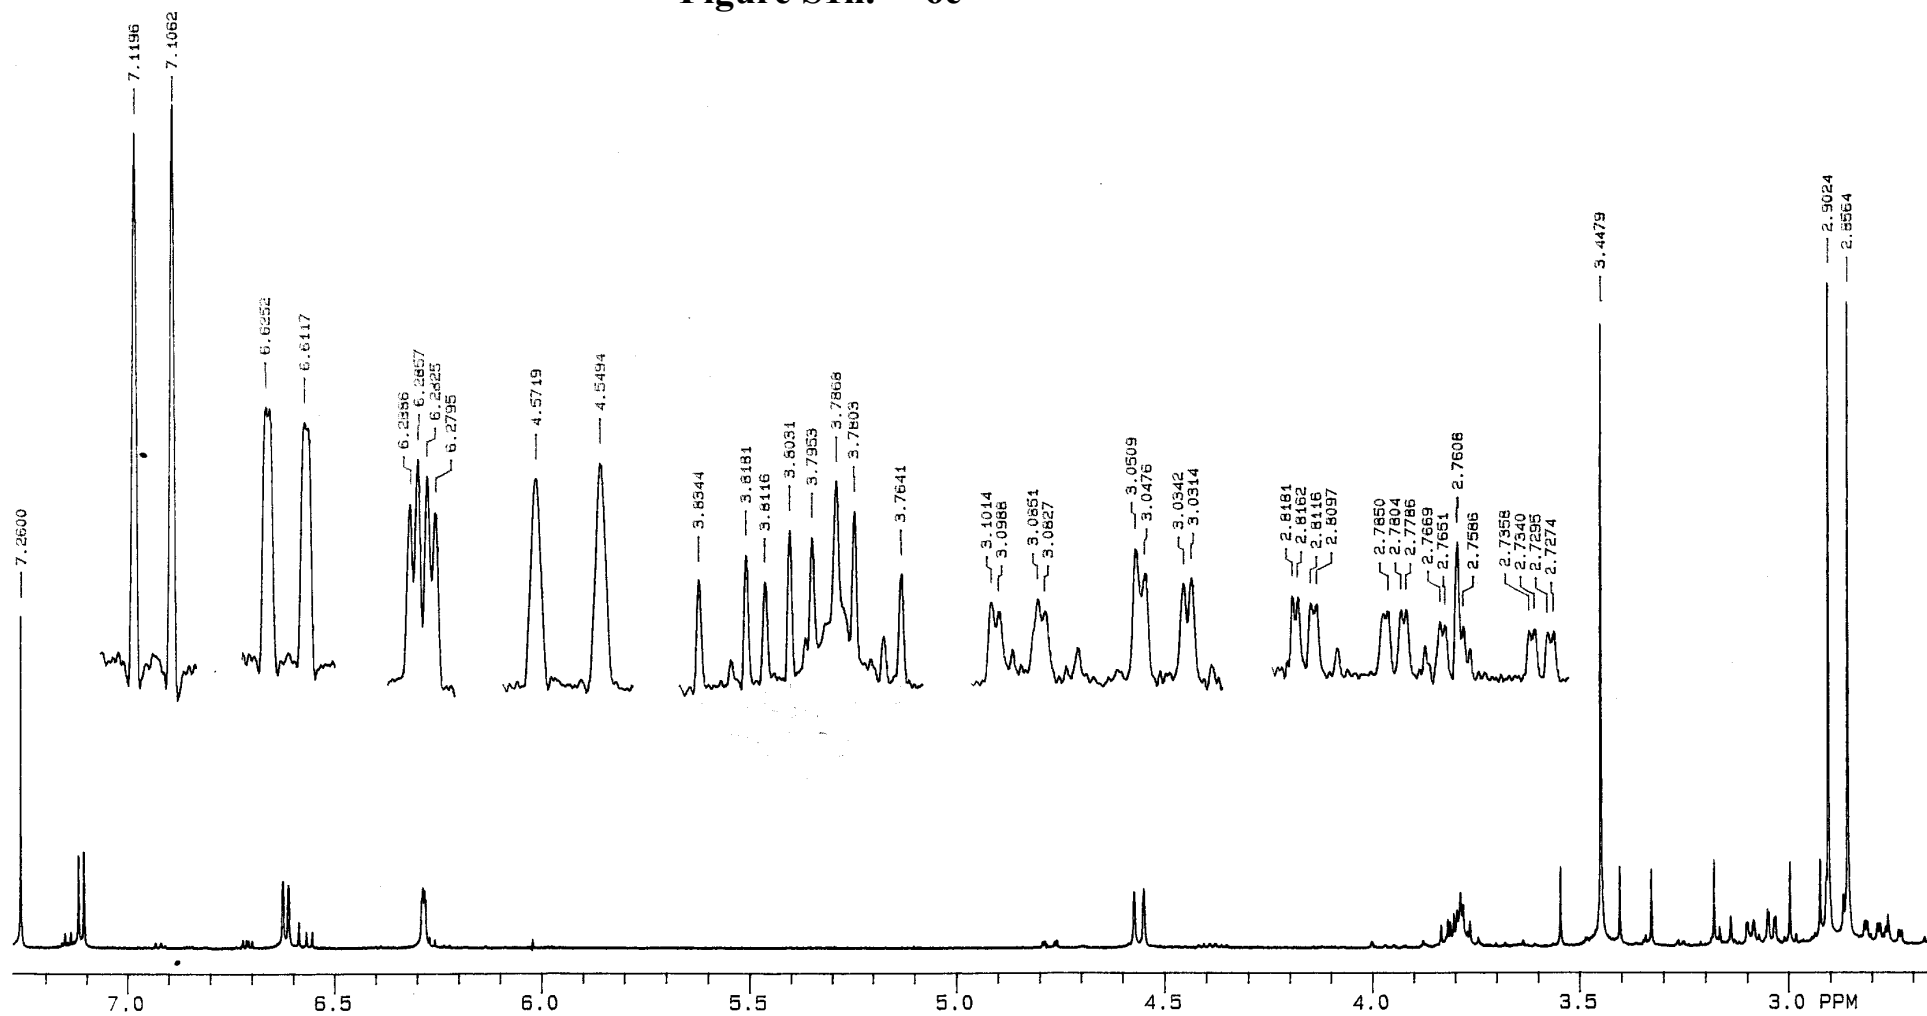

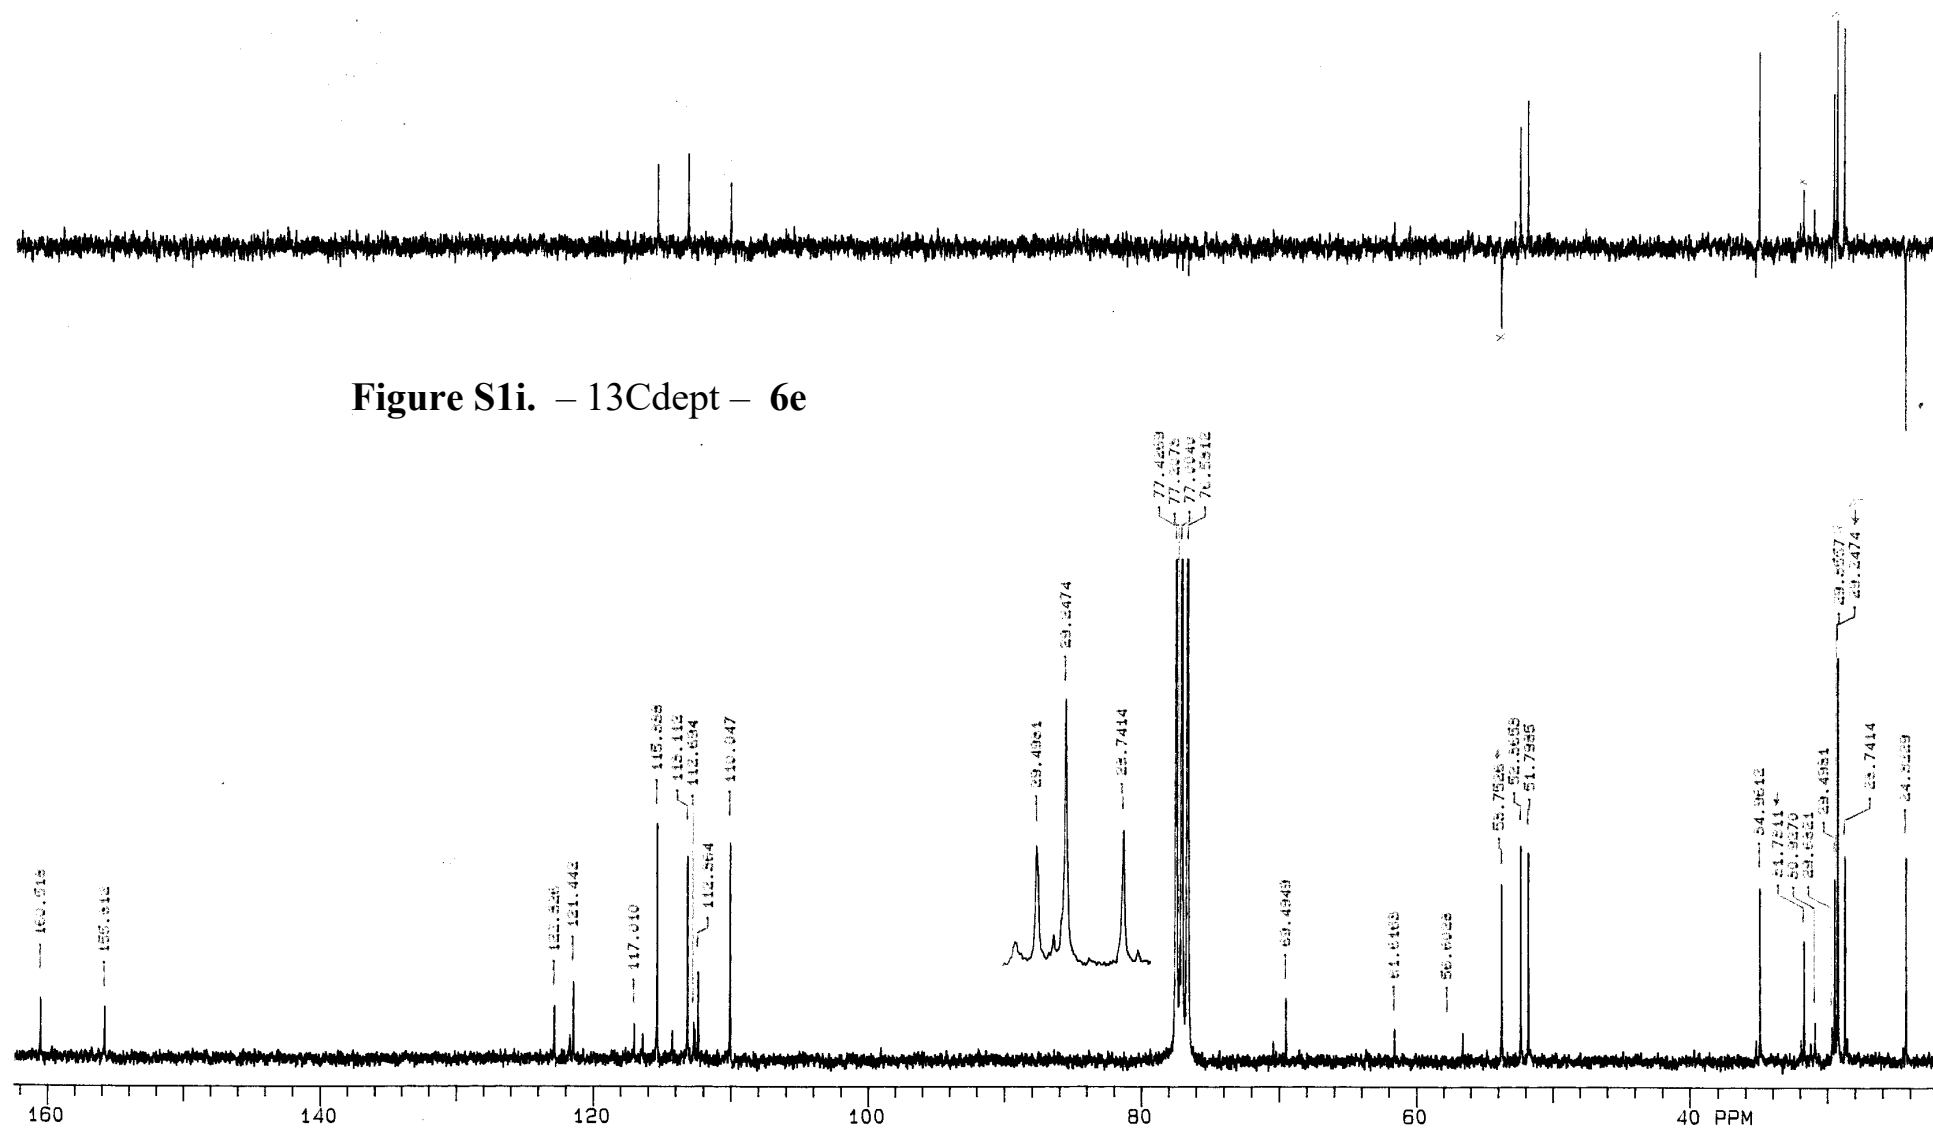

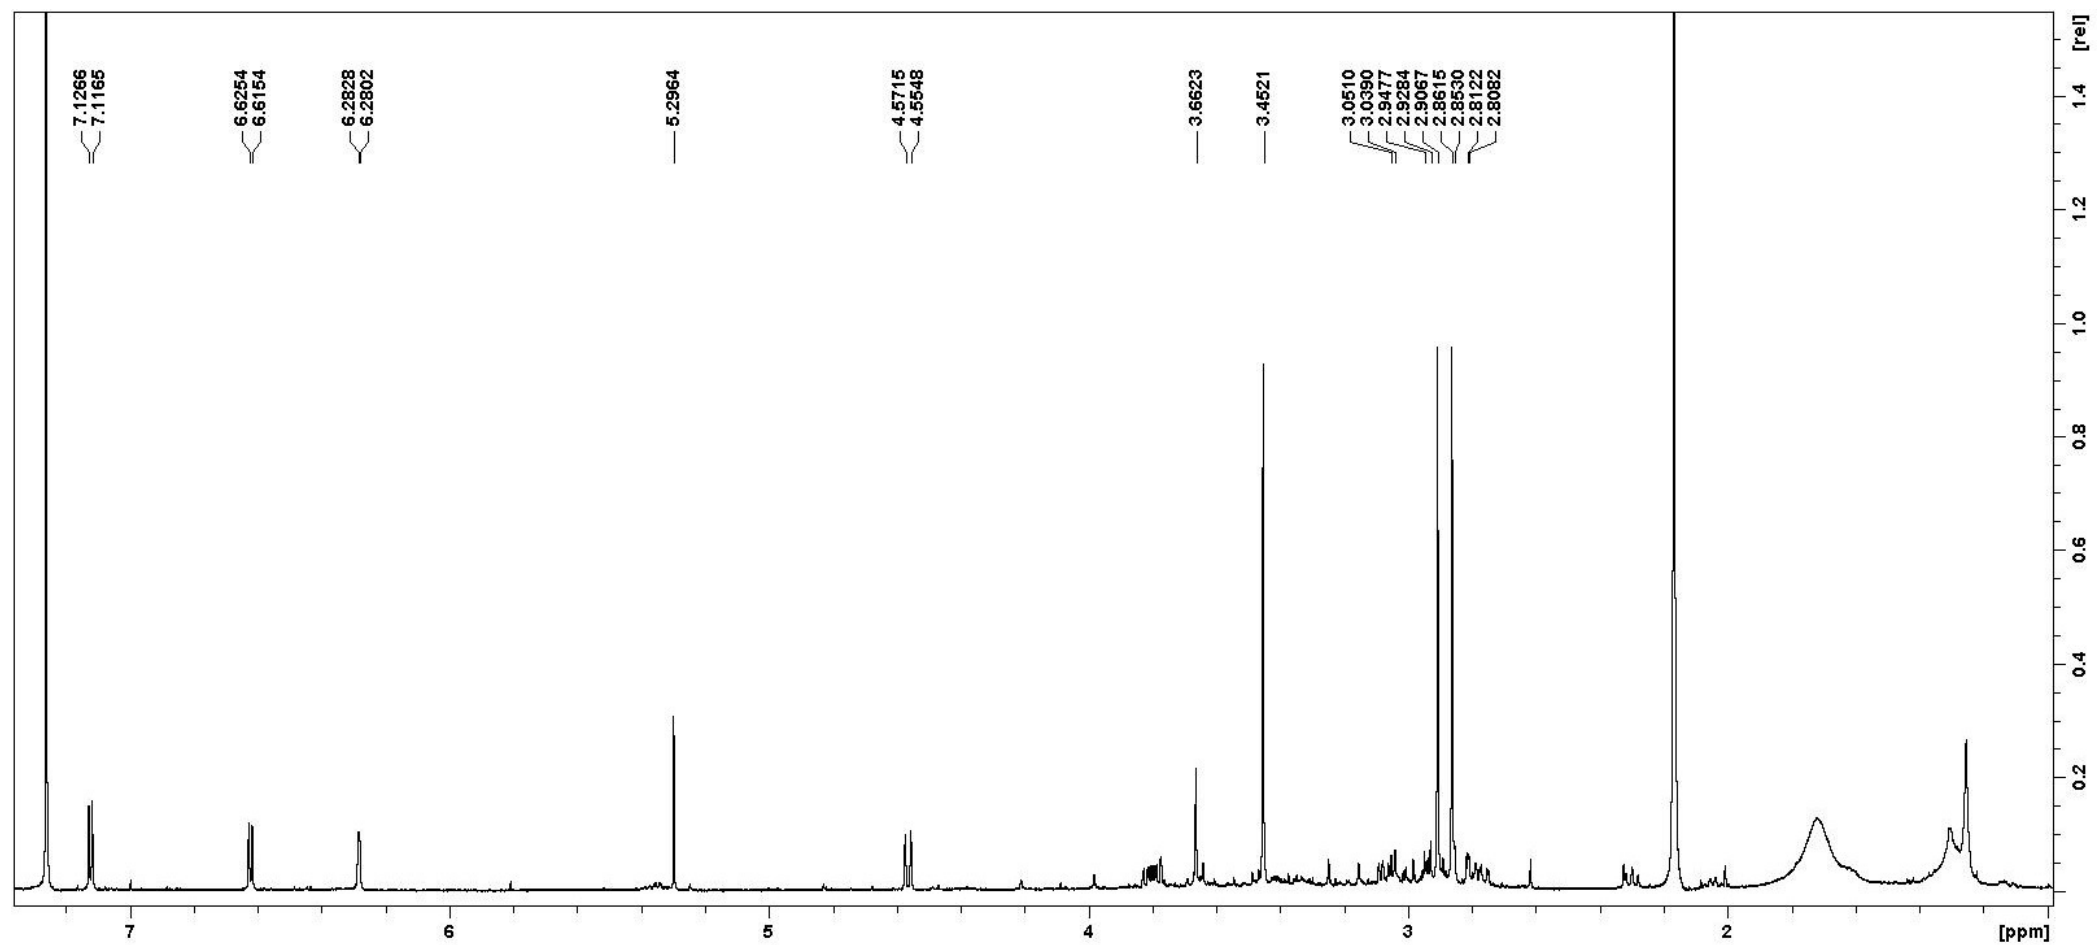

**Figure S2a.** – 2e + 2 equiv. MsOH, reflux – solvent CHCl<sub>3</sub>



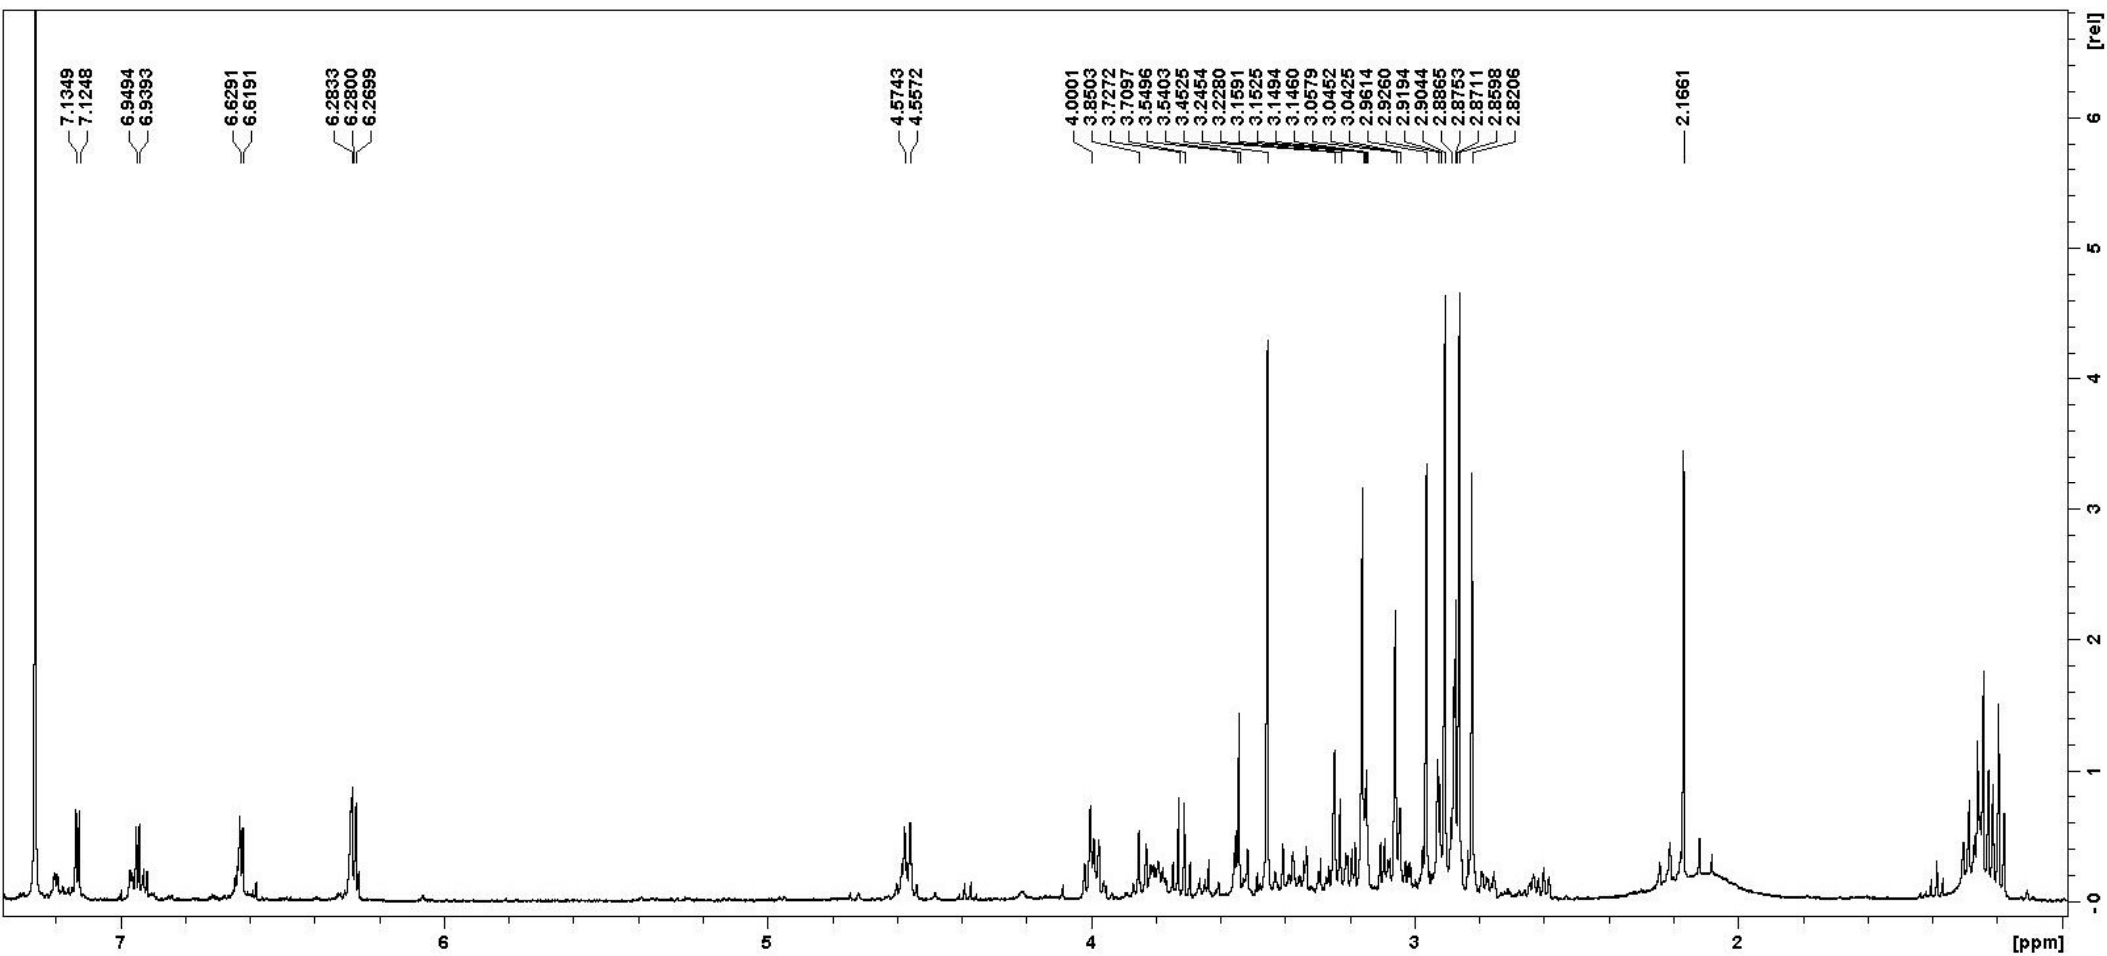

**Figure S2b.** – **2e** + 2 equiv. MsOH, reflux – solvent CH<sub>2</sub>Cl<sub>2</sub>

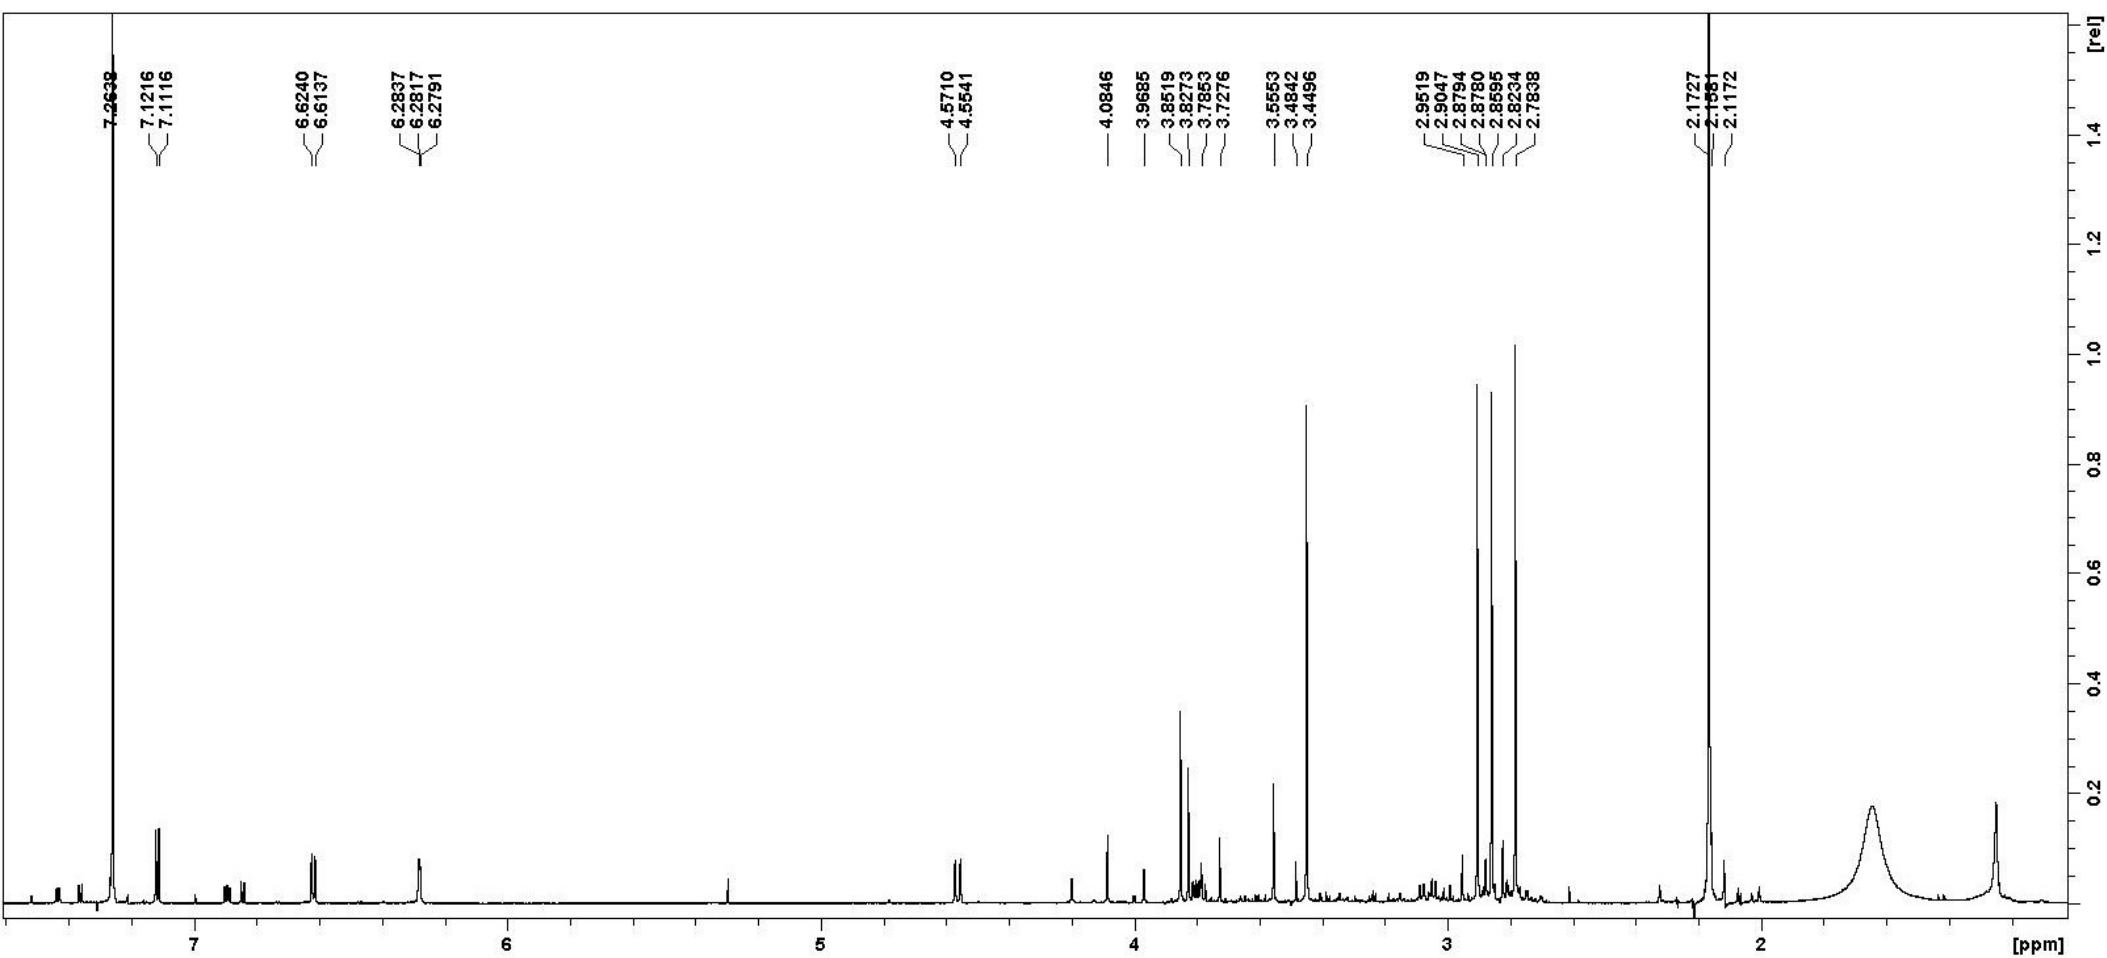

**Figure S2c.** – 2e + 2 equiv. MsOH, reflux – solvent CH<sub>2</sub>ClCH<sub>2</sub>Cl

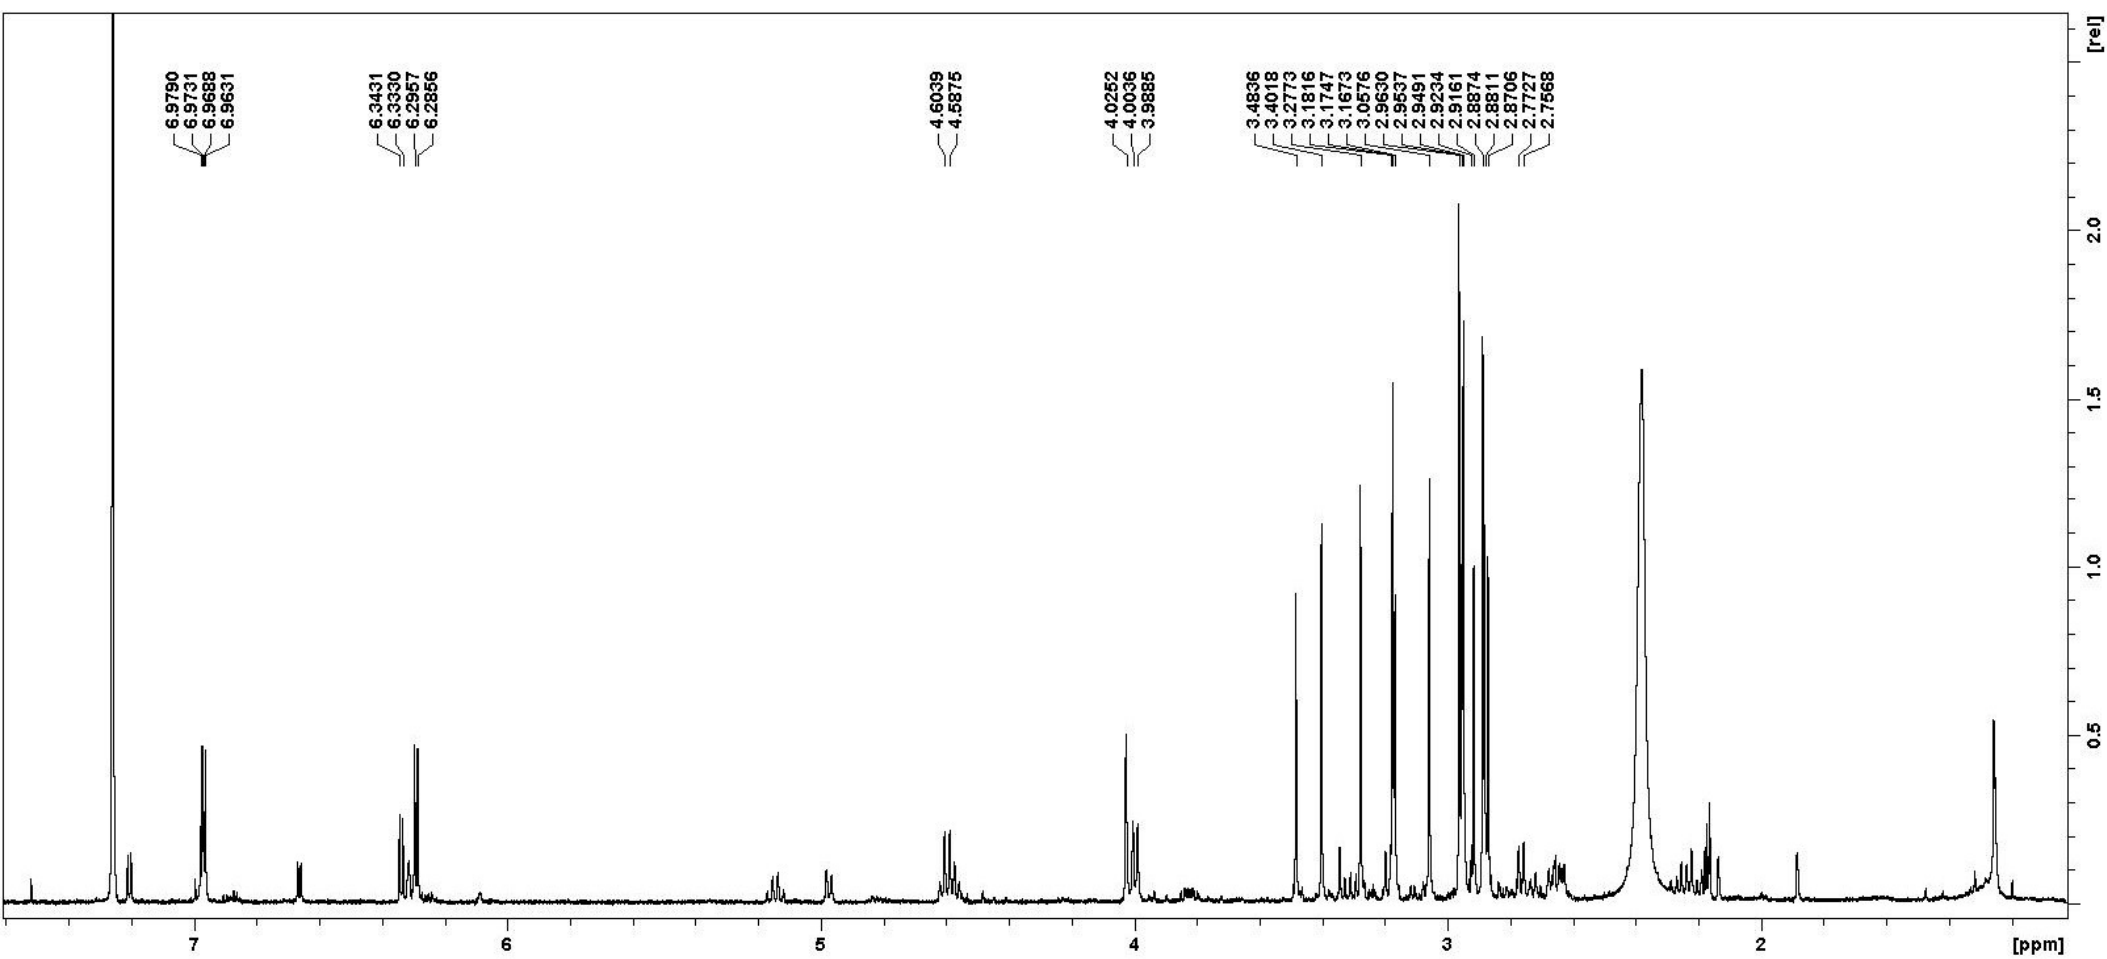

**Figure S2d.** – **2e** + 2 equiv. MsOH, reflux – solvent  $(\text{CH}_3)_2\text{C}=\text{O}$

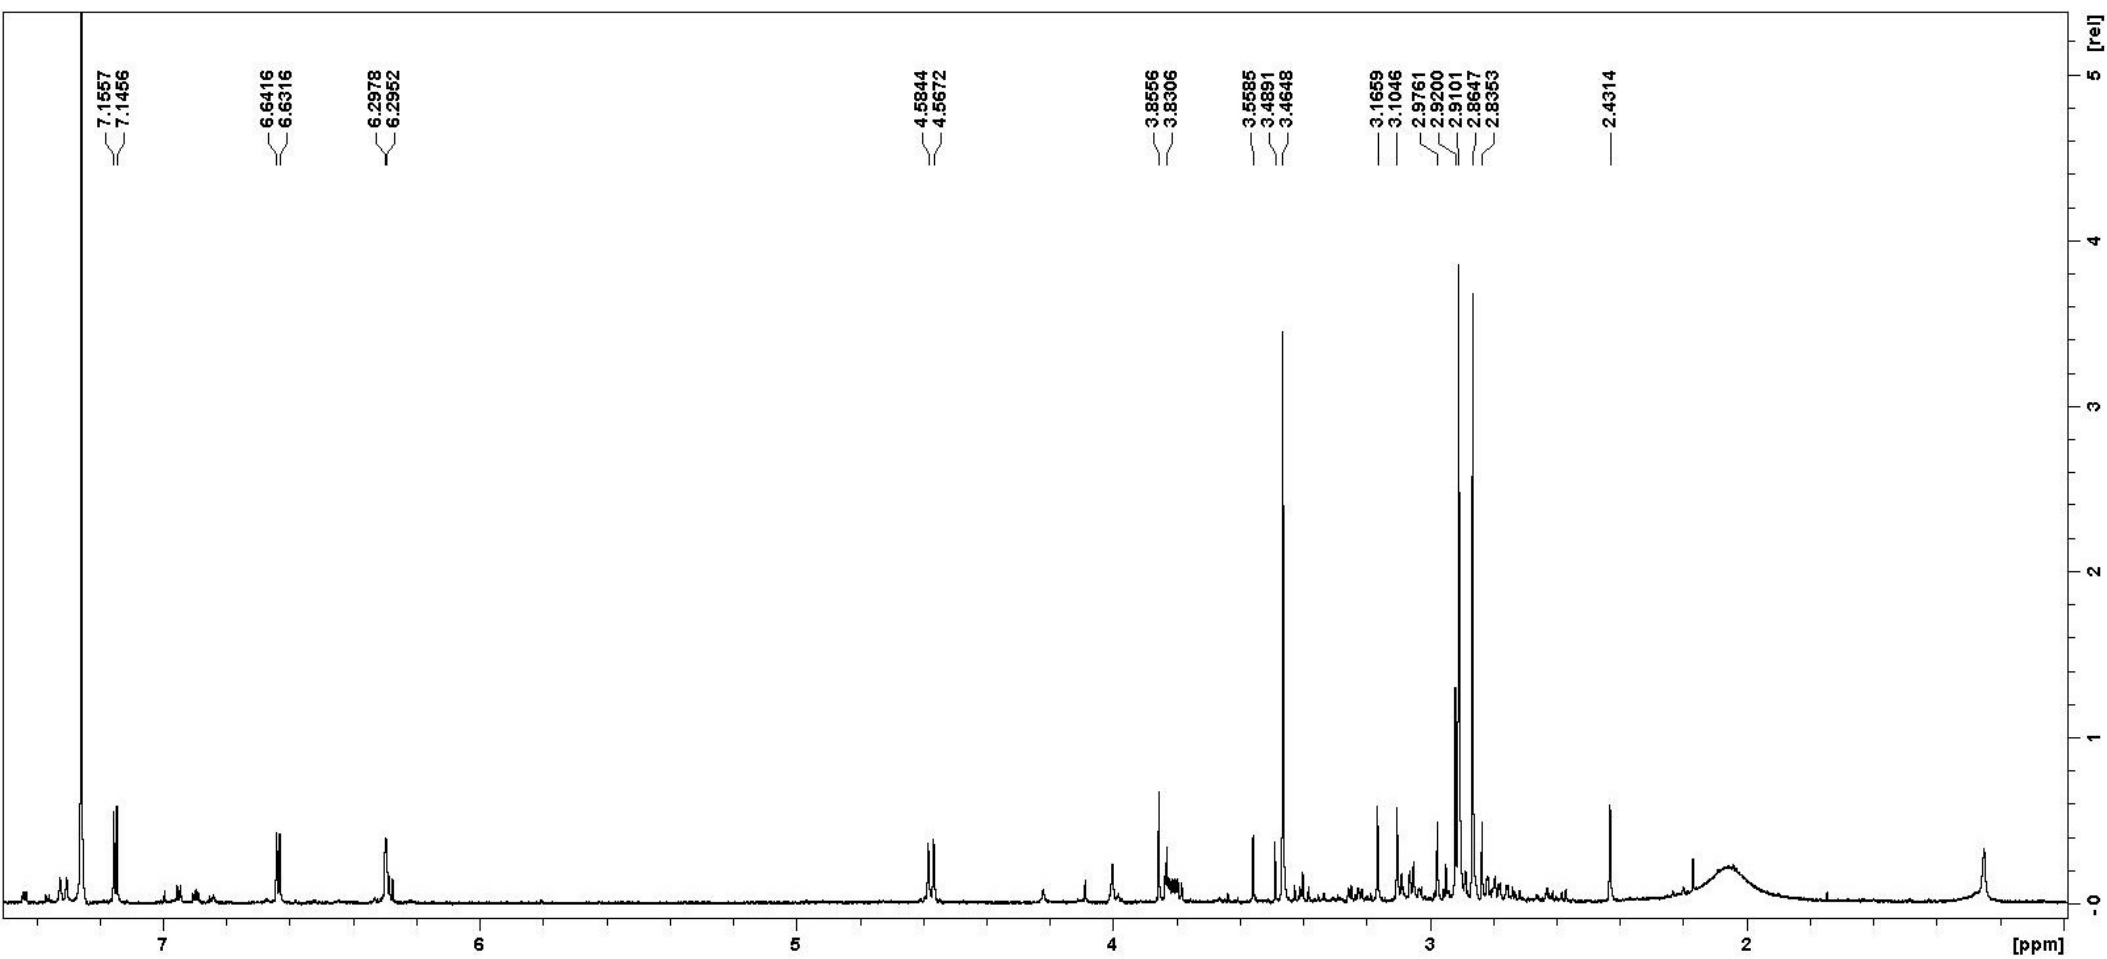

**Figure S2e.** – 2e + 2 equiv. MsOH, CHCl<sub>3</sub> - room temperature, 6 days

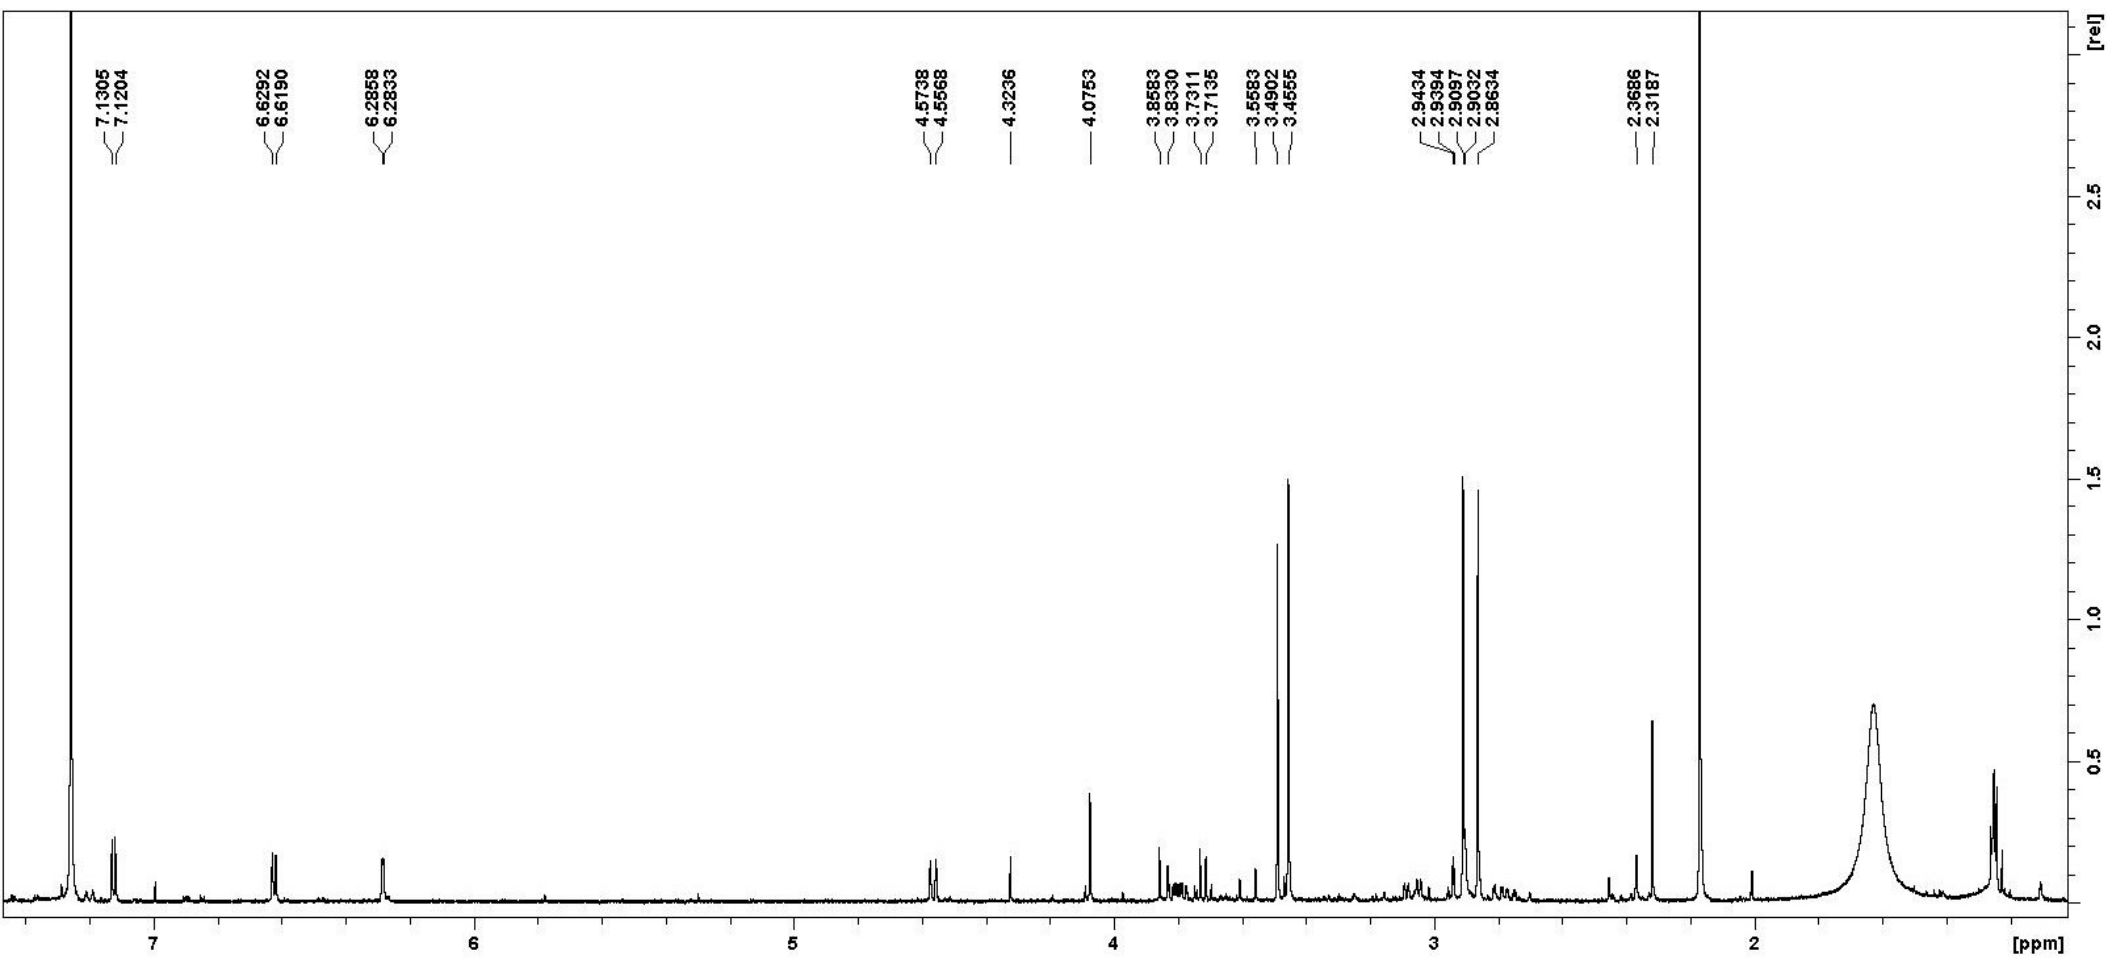

**Figure S3a.** – 2e in CHCl<sub>3</sub> reflux, 2 equiv. pTsOH

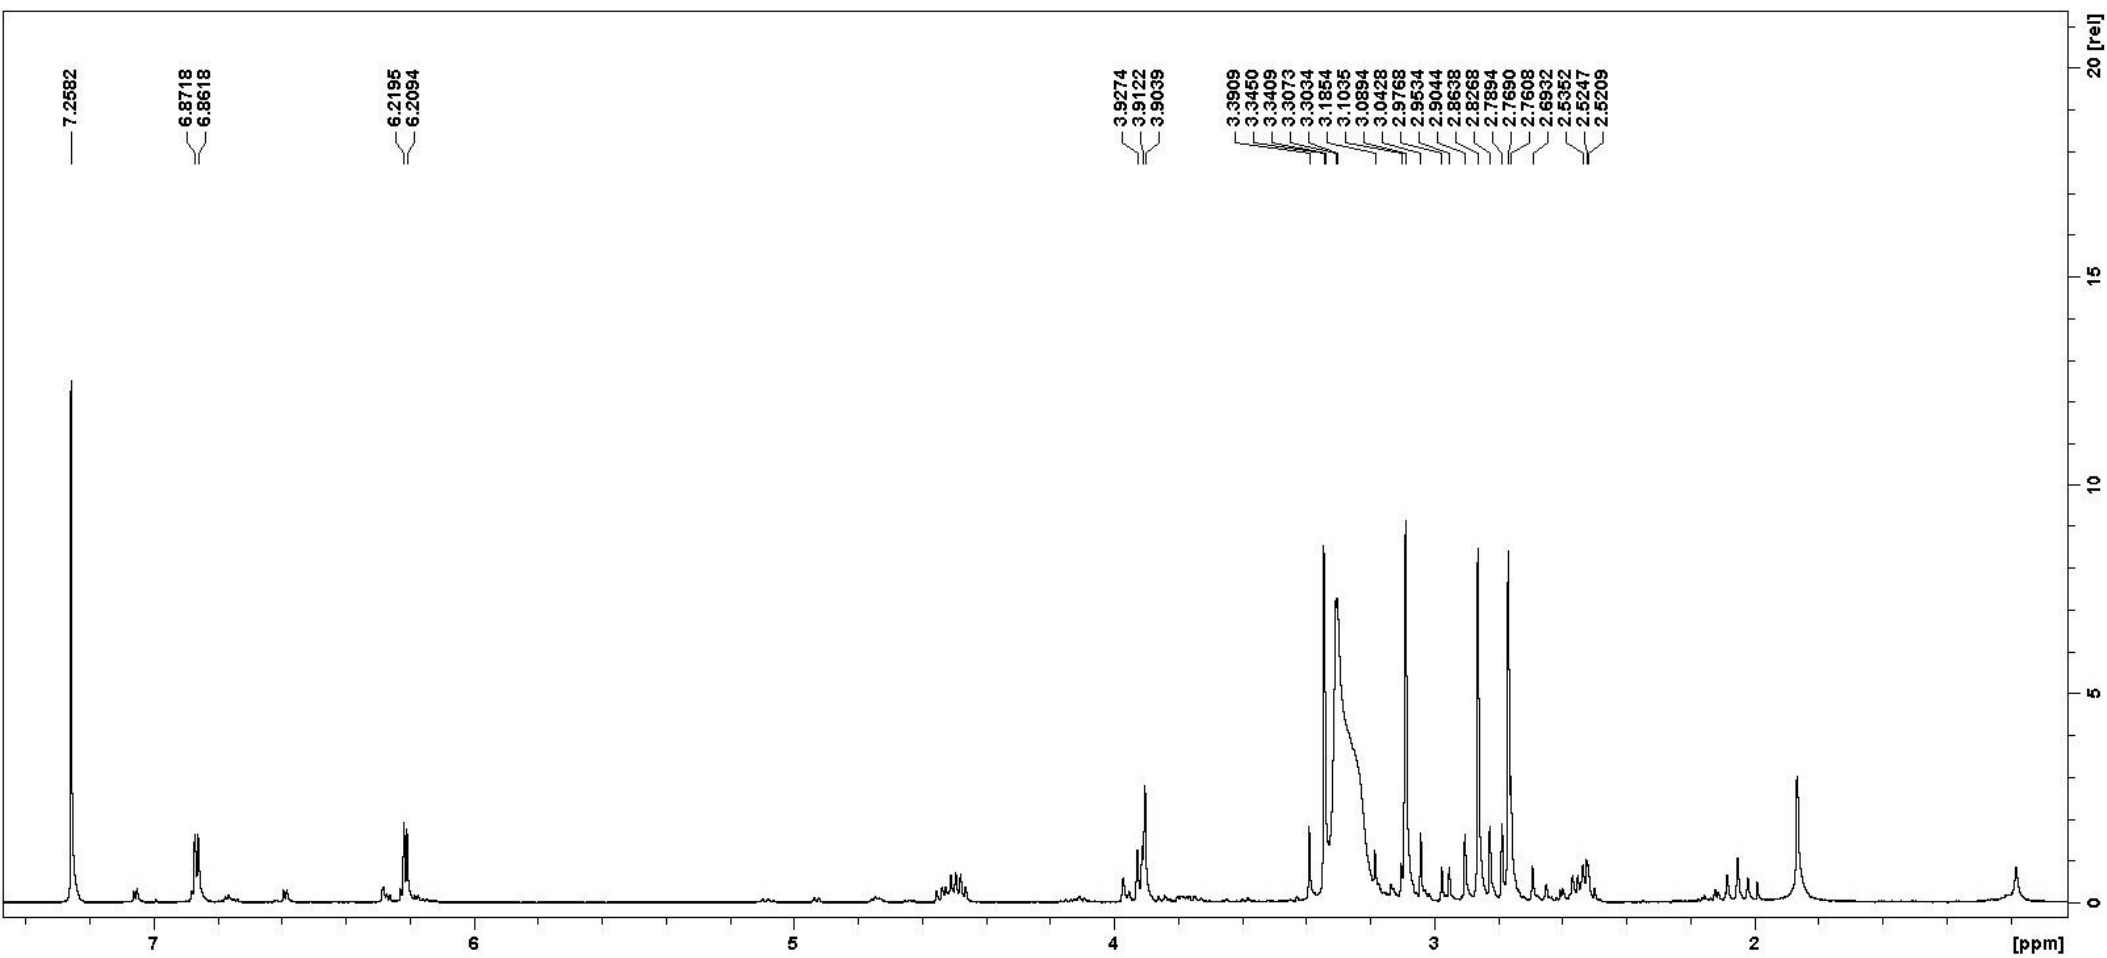

**Figure S3b.** – **2e** in CHCl<sub>3</sub> reflux, 2 equiv. AcCl

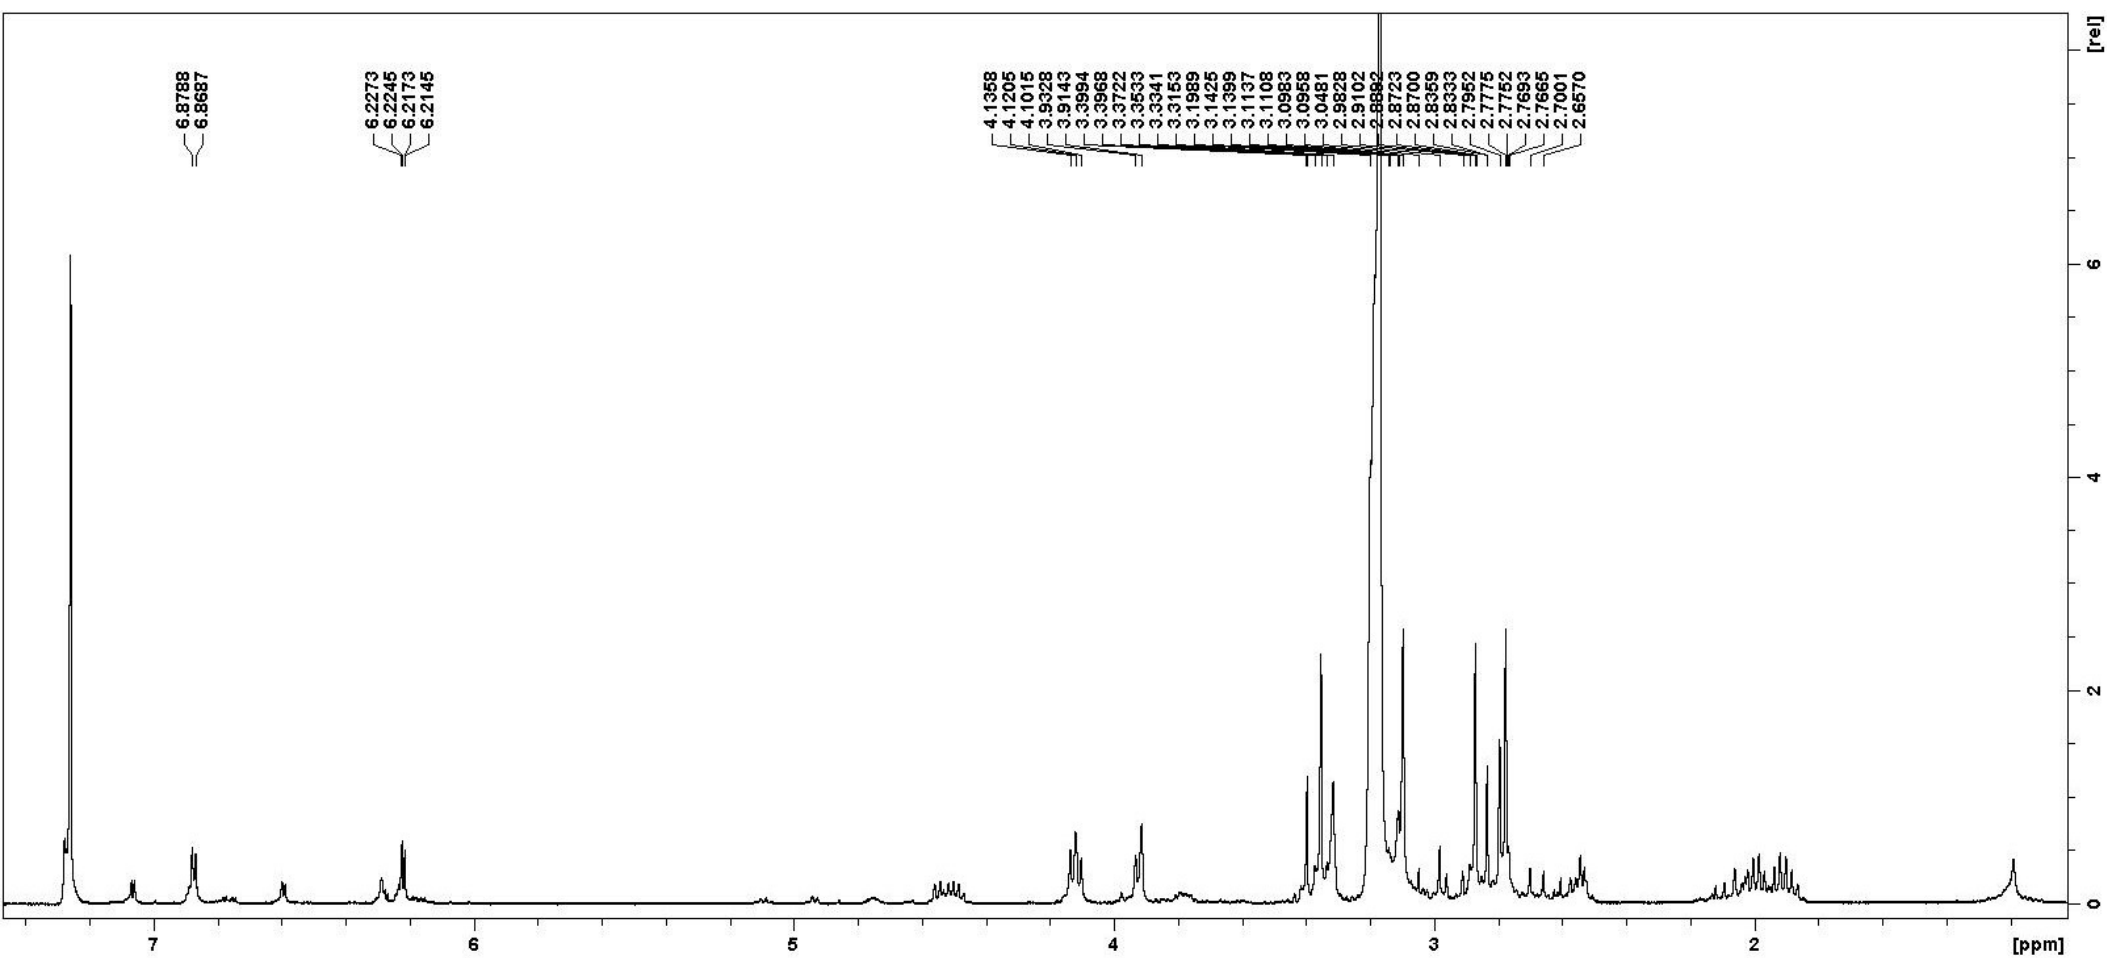

**Figure S3c.** – **2e** in CHCl<sub>3</sub> reflux, 2 equiv. PrCOBr

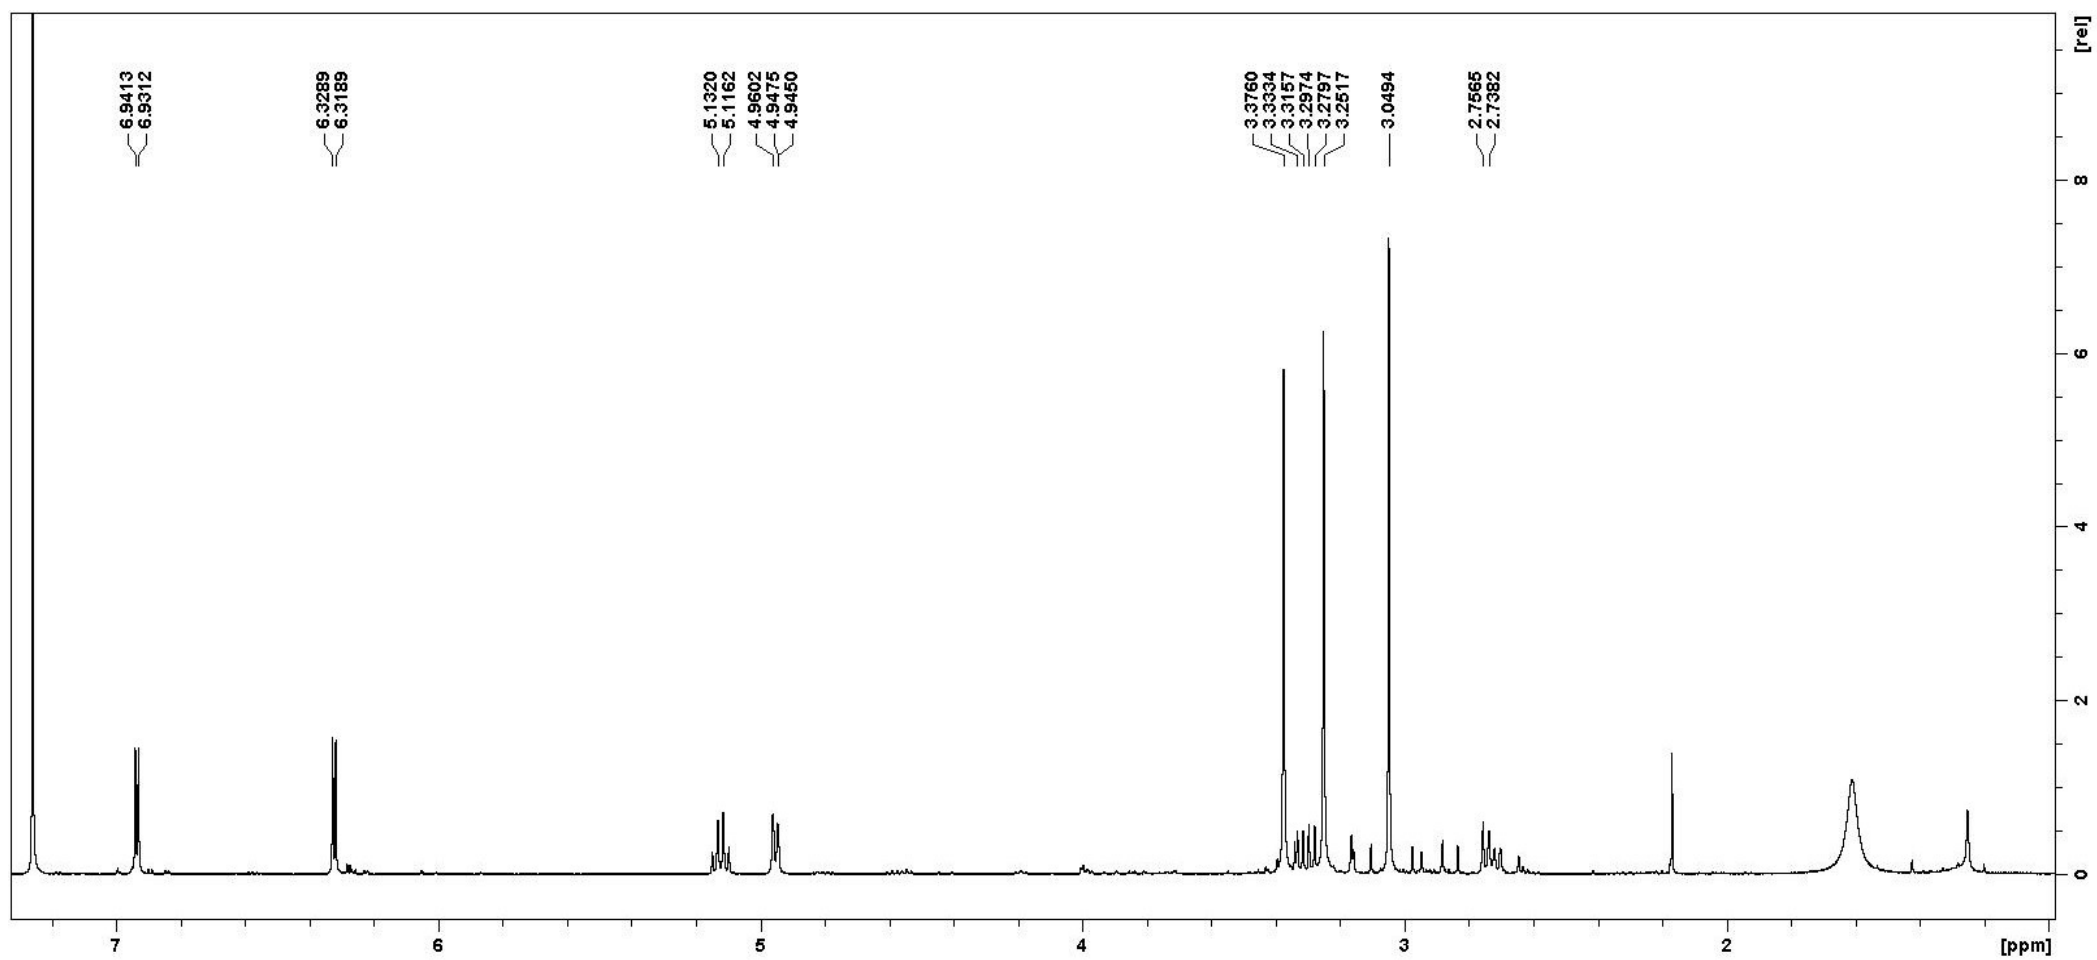

**Figure S3d.** – **2e** in CHCl<sub>3</sub> reflux, 2 equiv. CF<sub>3</sub>COOH



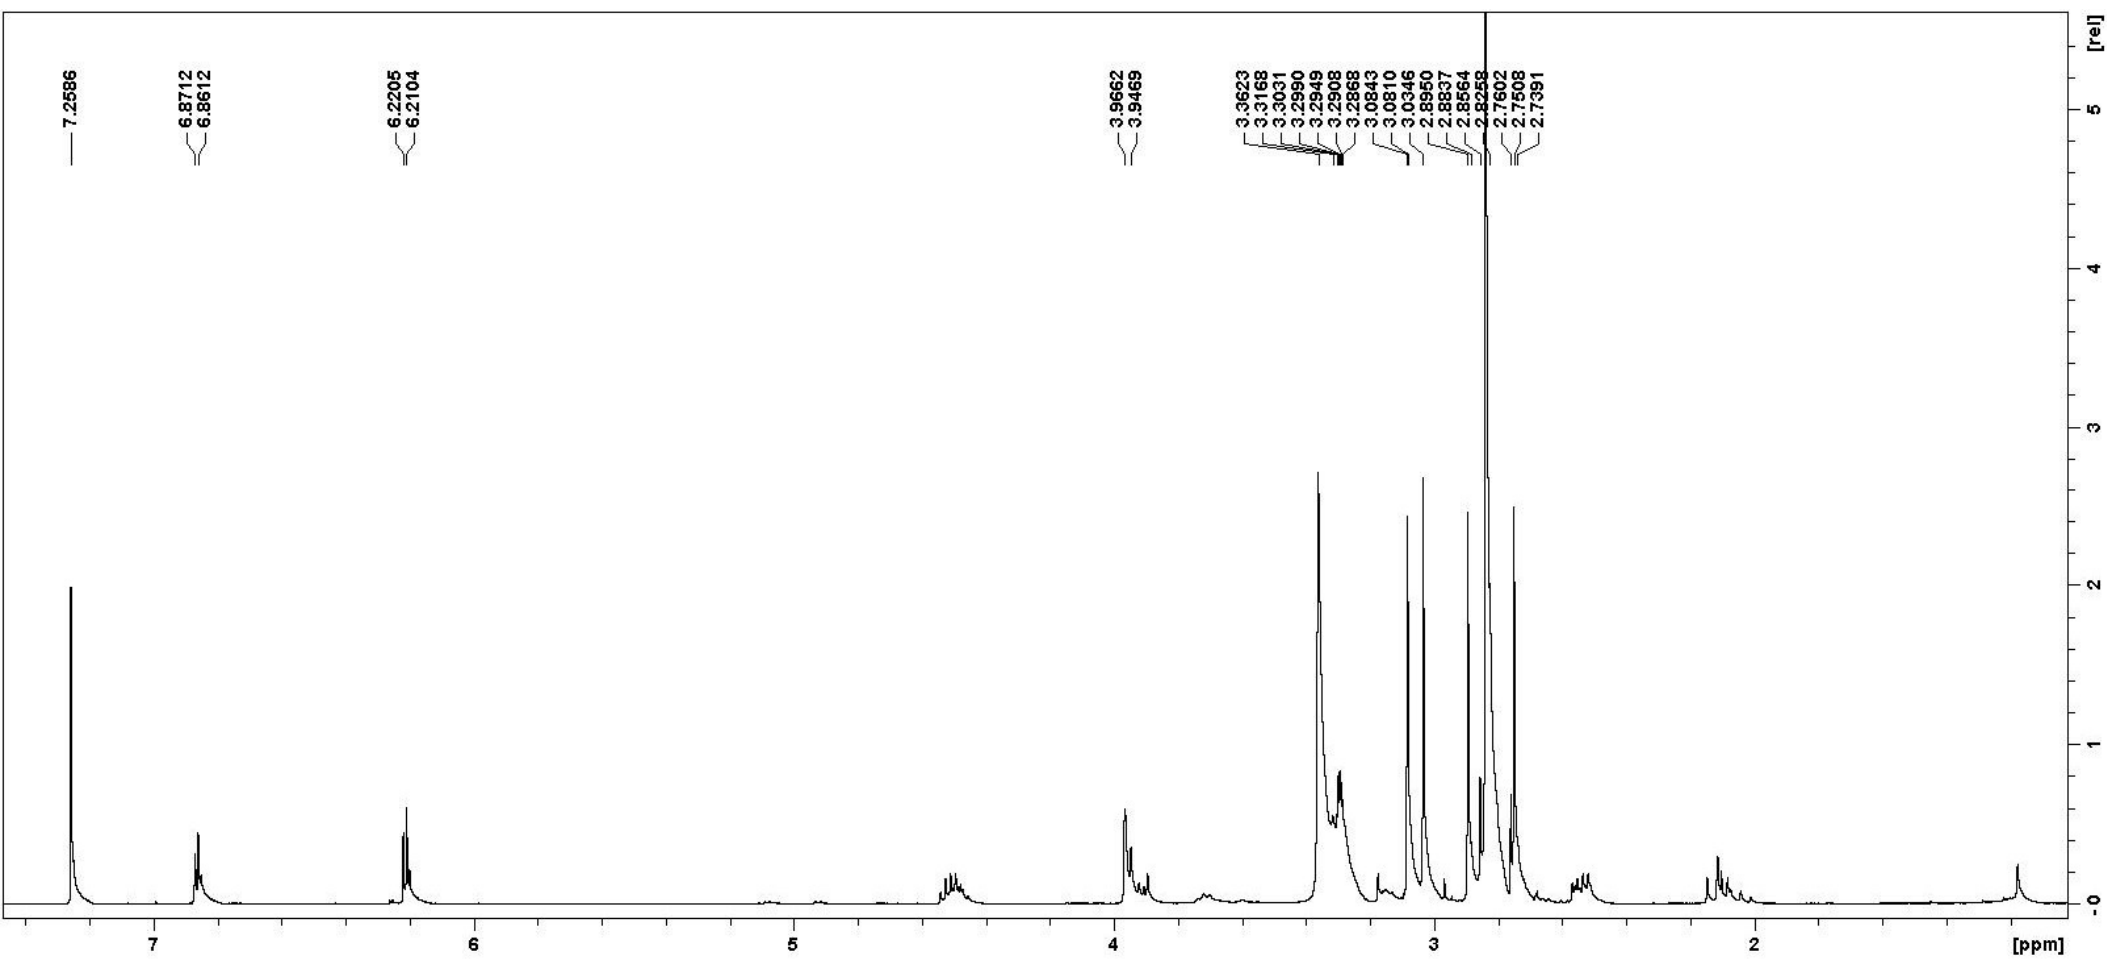

**Figure S3e.** – **2e** in CHCl<sub>3</sub> reflux, no strong acid

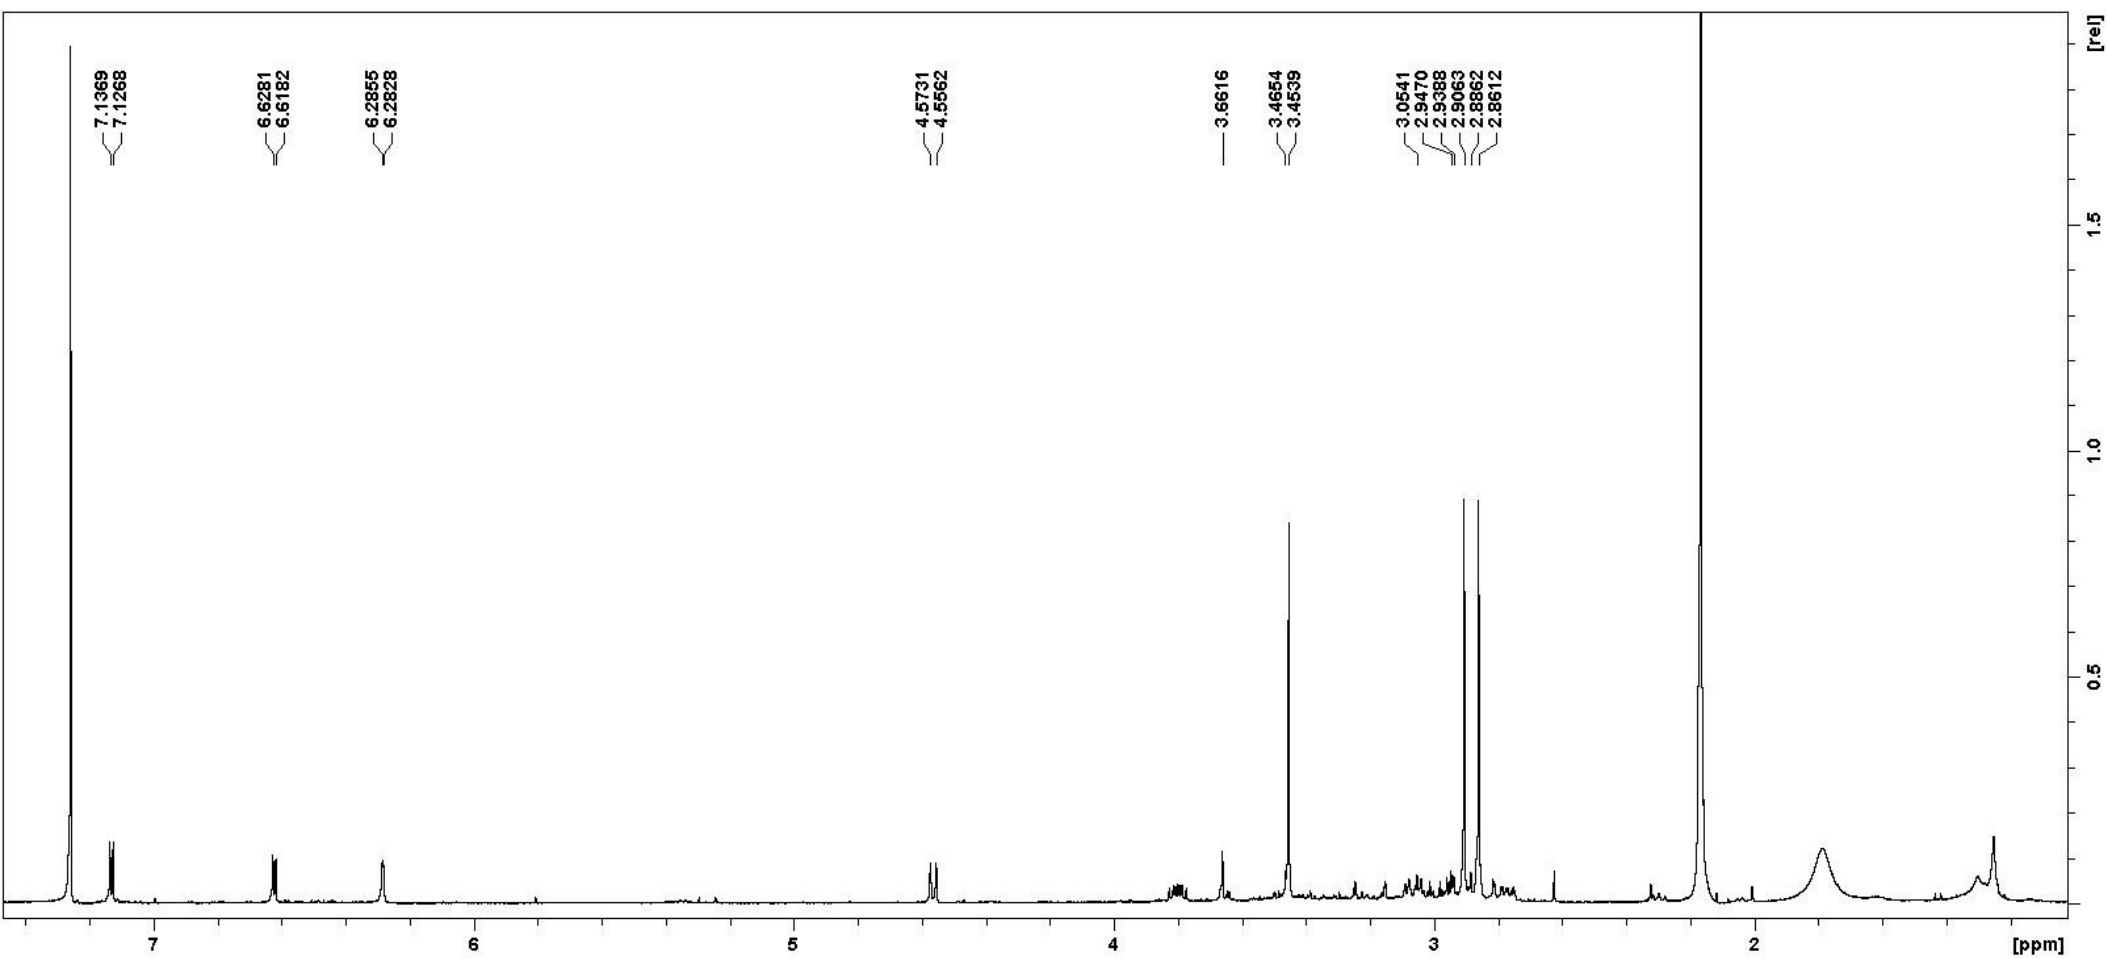

**Figure S4a.** – **2e** in CHCl<sub>3</sub> reflux, 1 equiv. MsOH

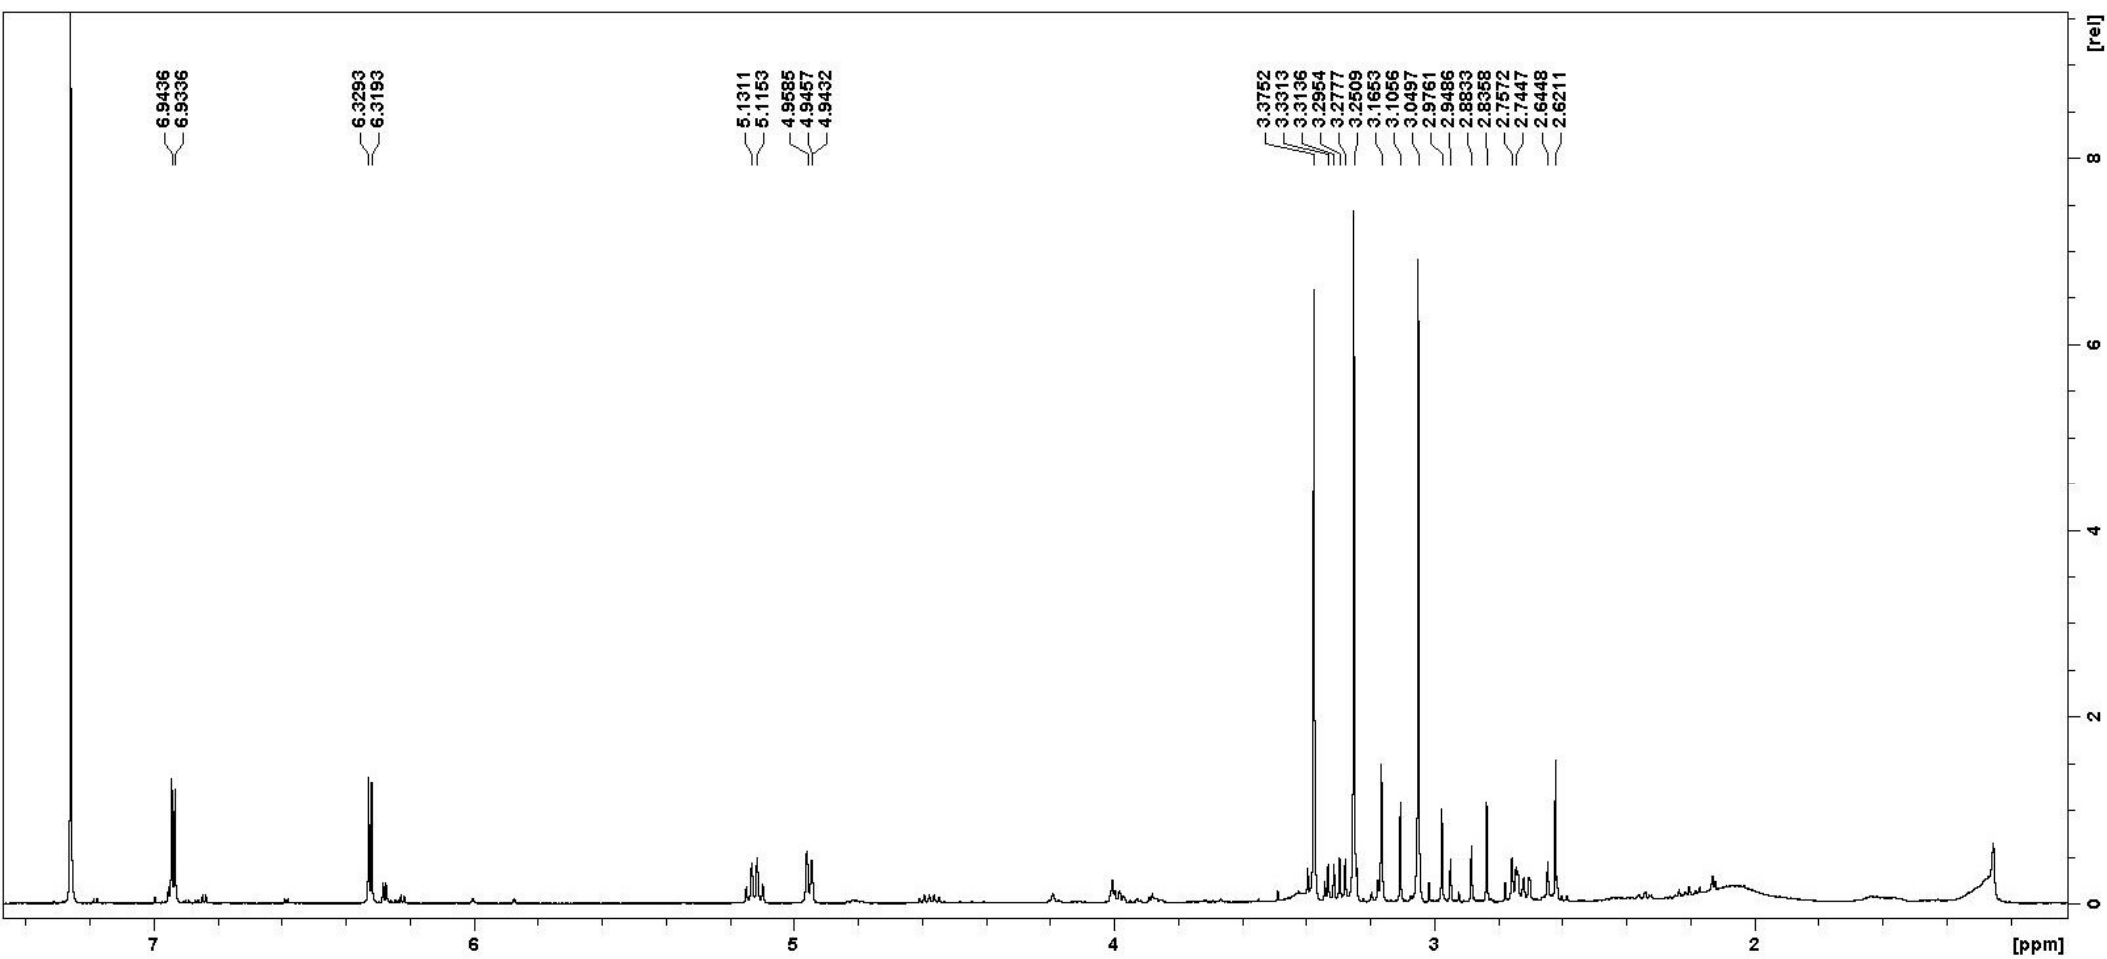

**Figure S4b.** – 2e in CHCl<sub>3</sub> reflux, 0,1 equiv. MsOH, 3e/1e/4e ~ 90:10:2

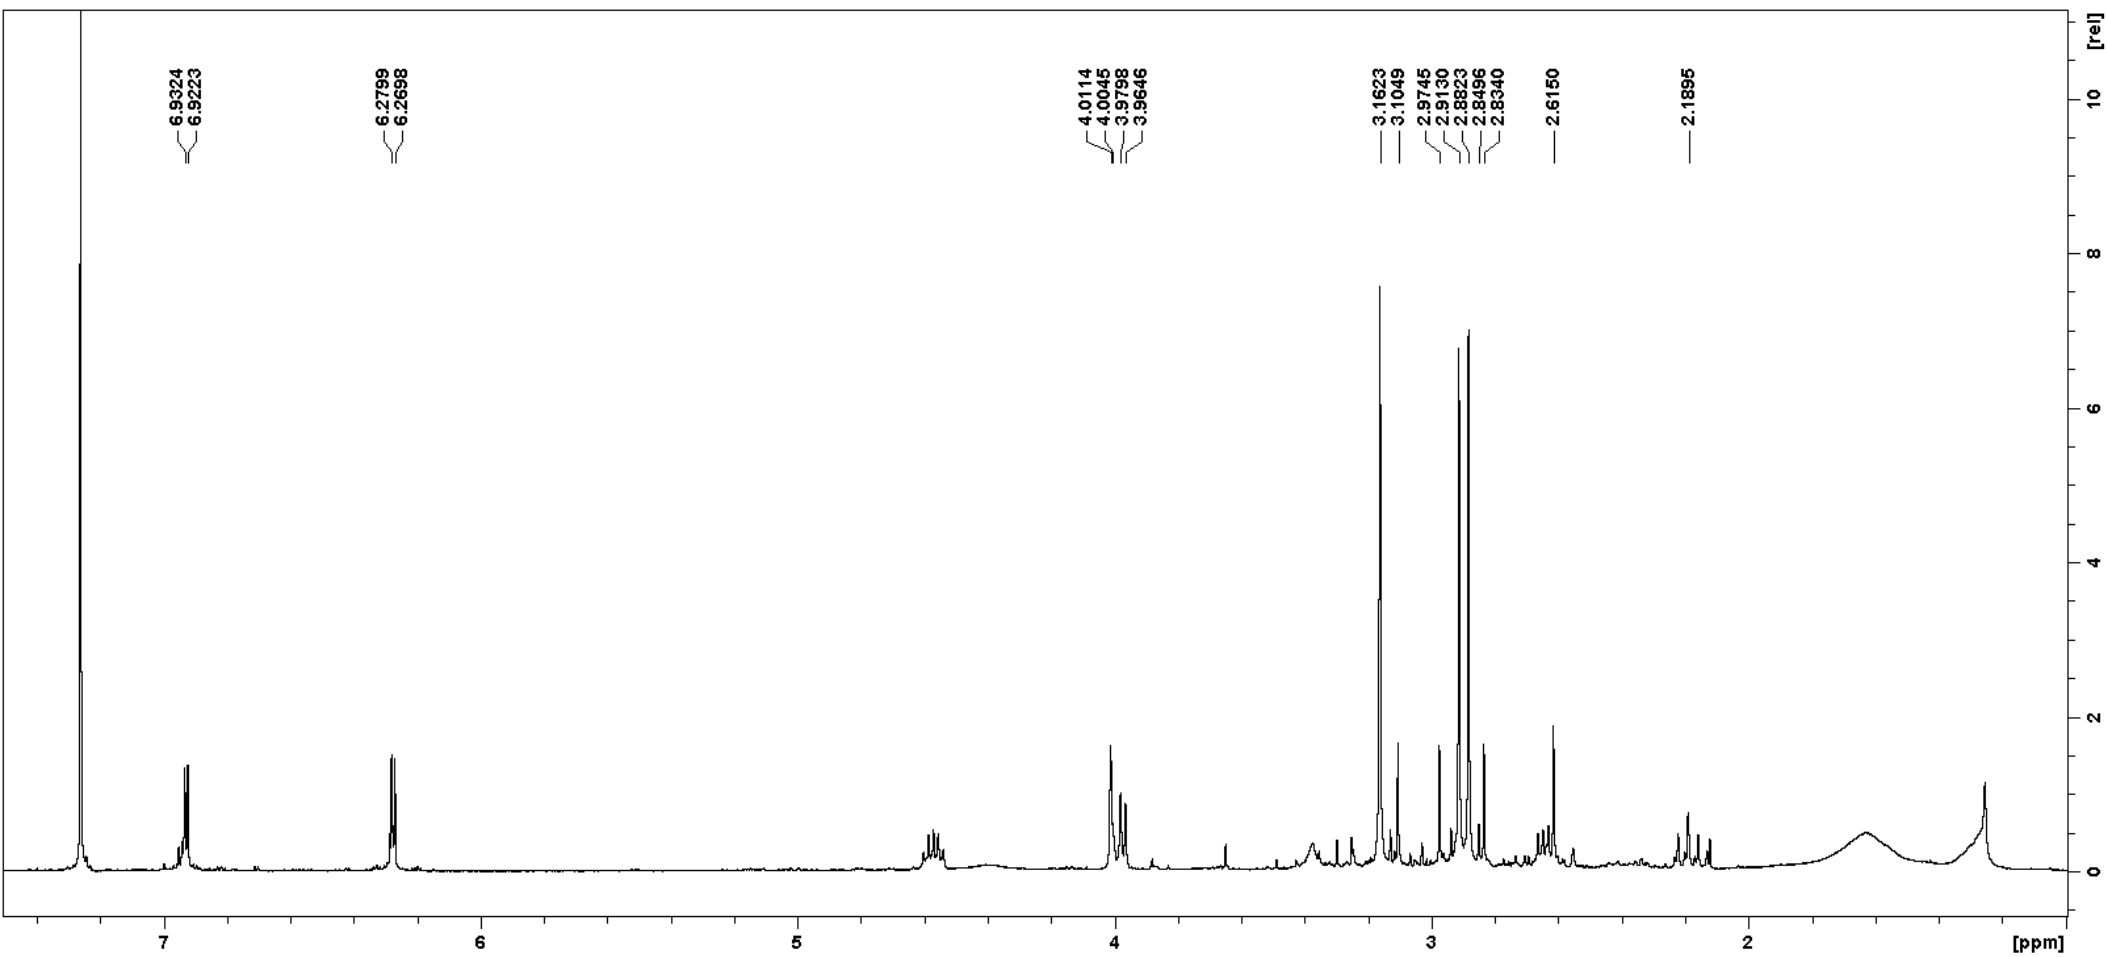

**Figure S4c.** – 2e in CHCl<sub>3</sub> reflux, 0,1 equiv. MsOH after one week

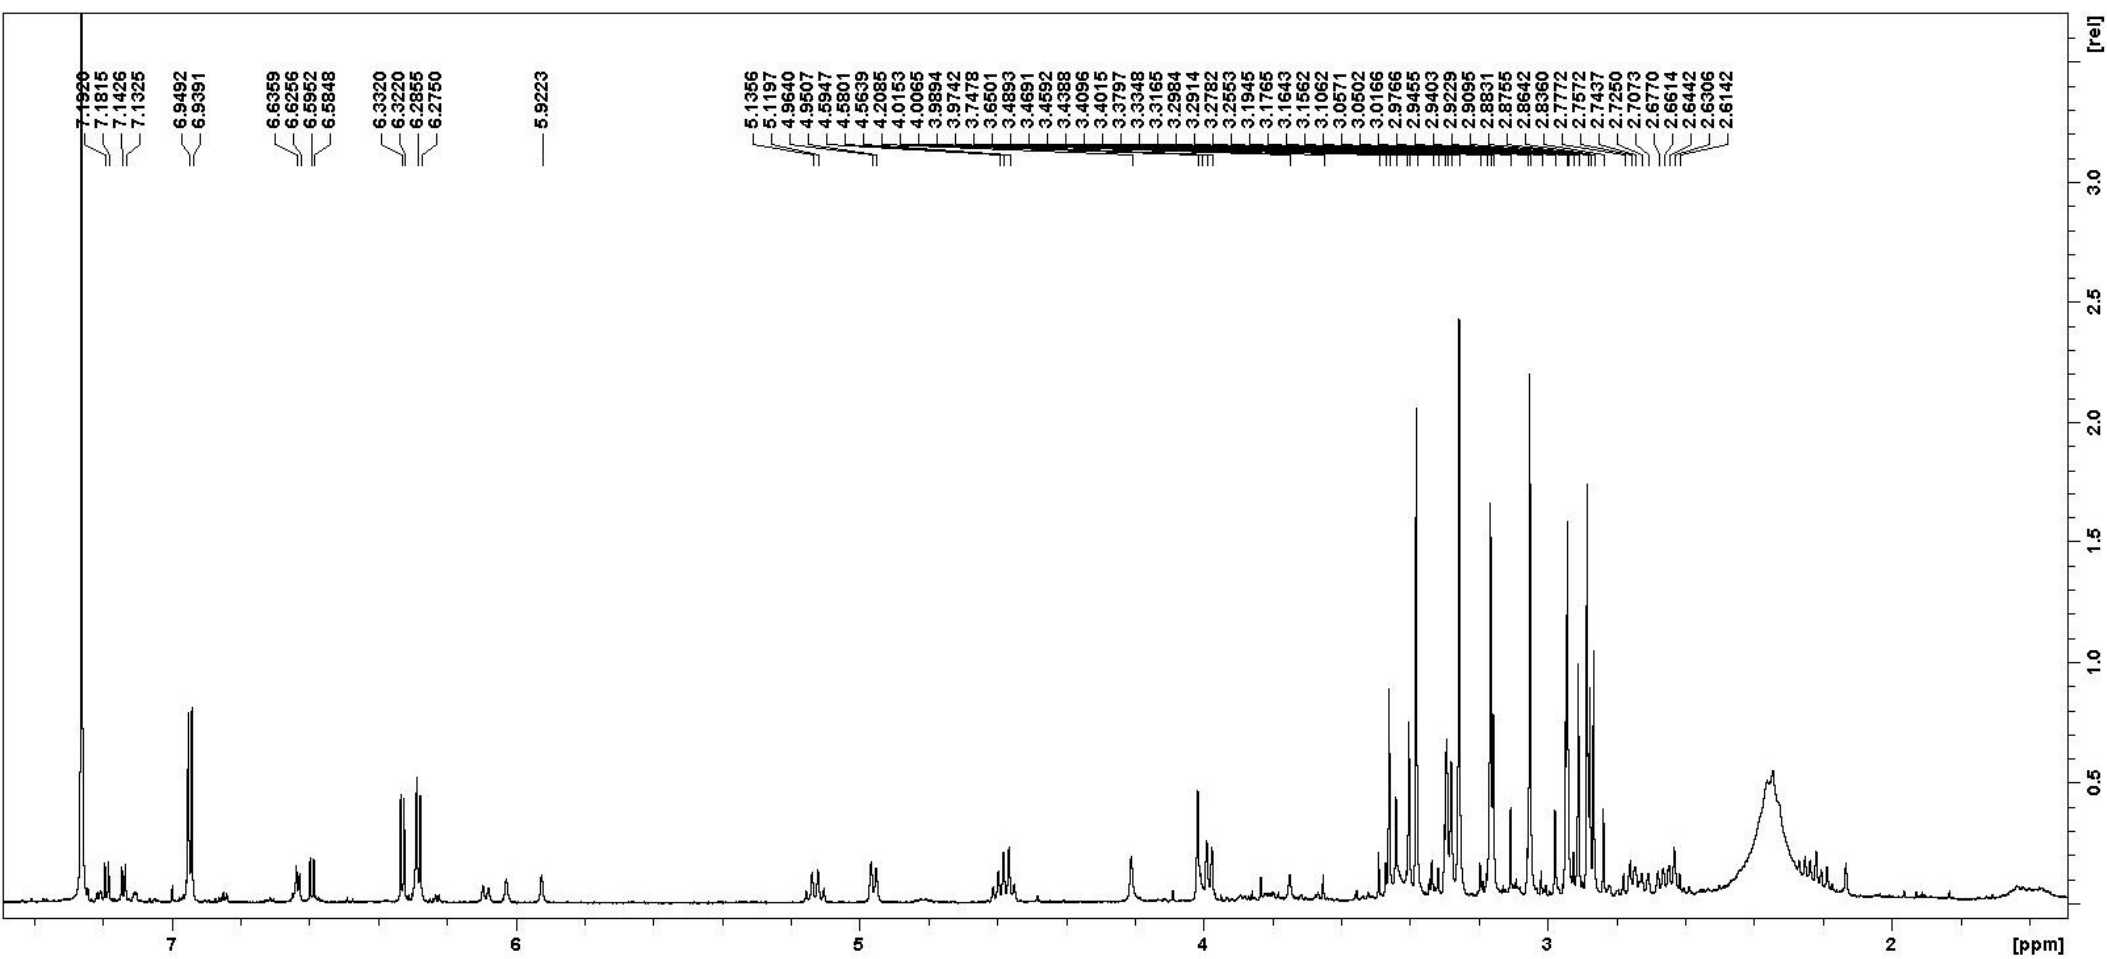

**Figure S4d.** – **2e** in CHCl<sub>3</sub> reflux, 0,5 equiv. MsOH, **3e** ~ **1e/4e/6e/5e** ~ 40:40:10:8:2

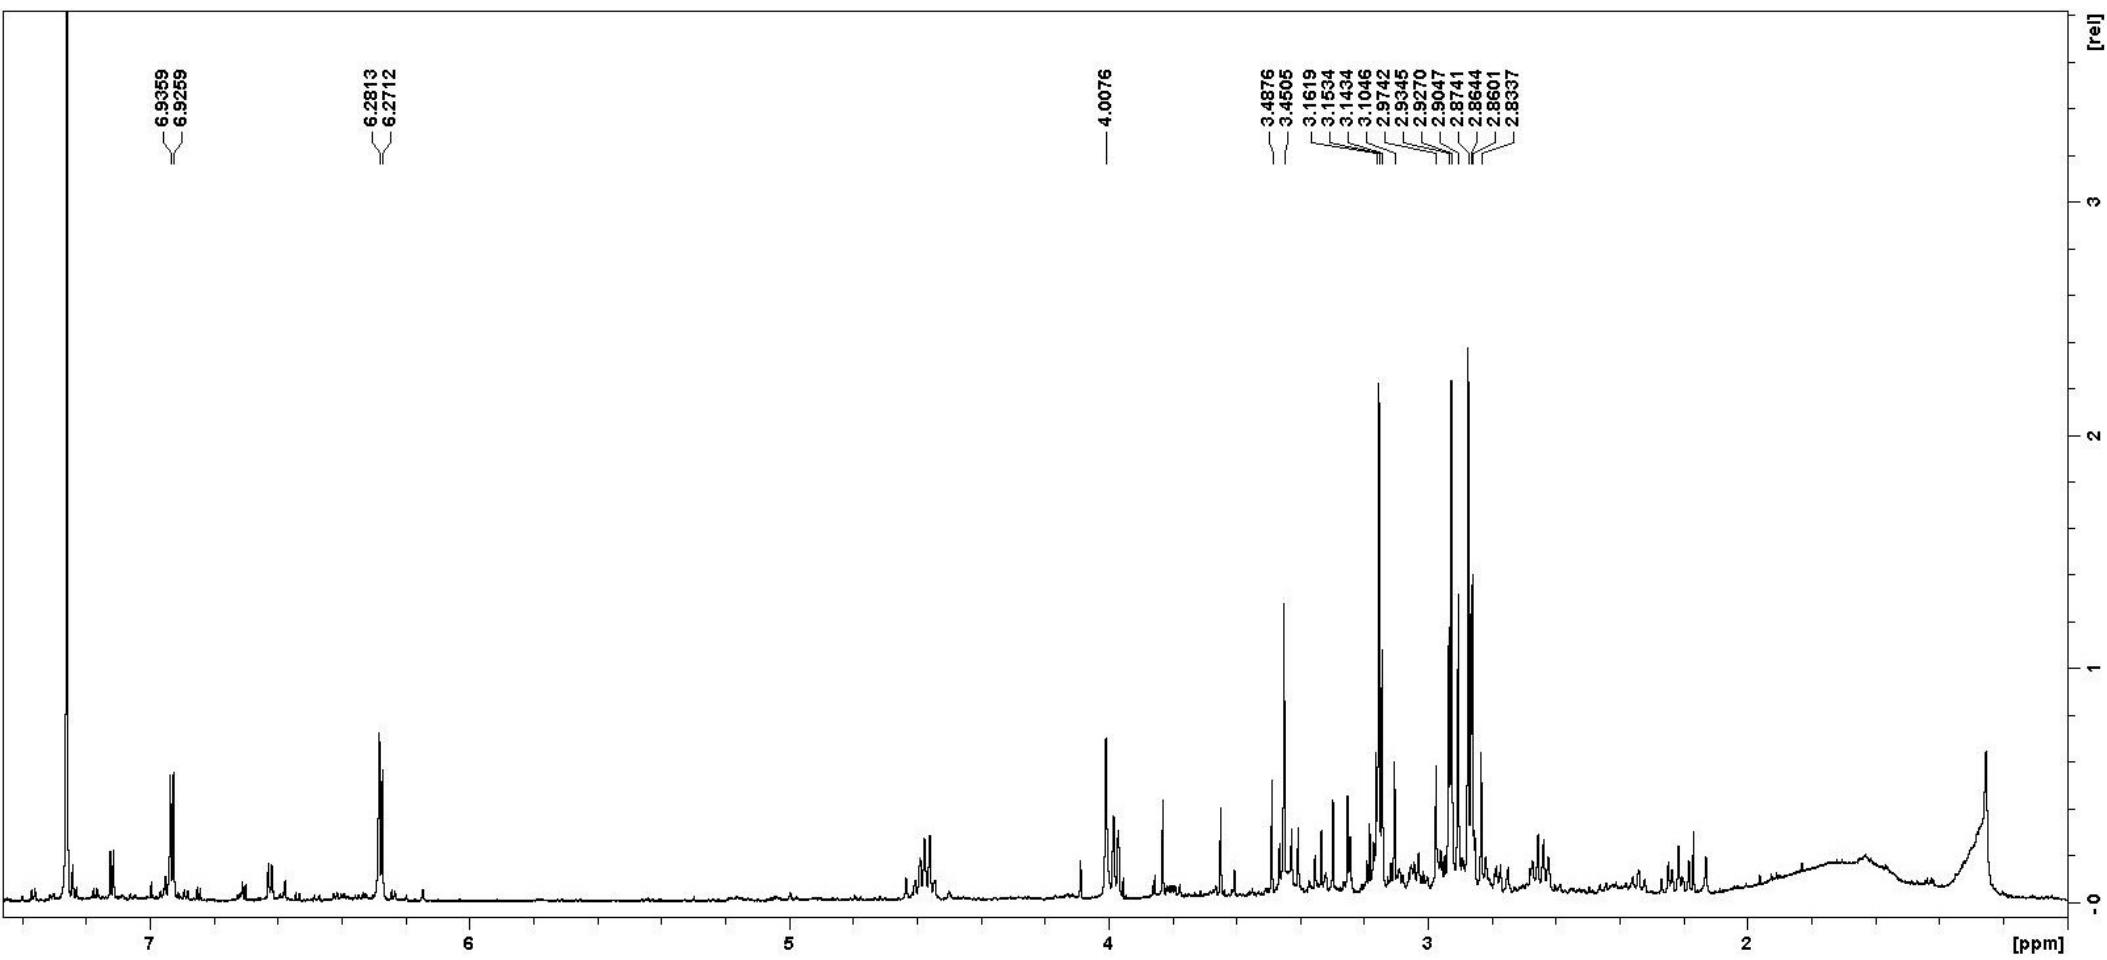

**Figure S4e.** — **2e** in CHCl<sub>3</sub> reflux, 0,5 equiv. MsOH after 2 weeks

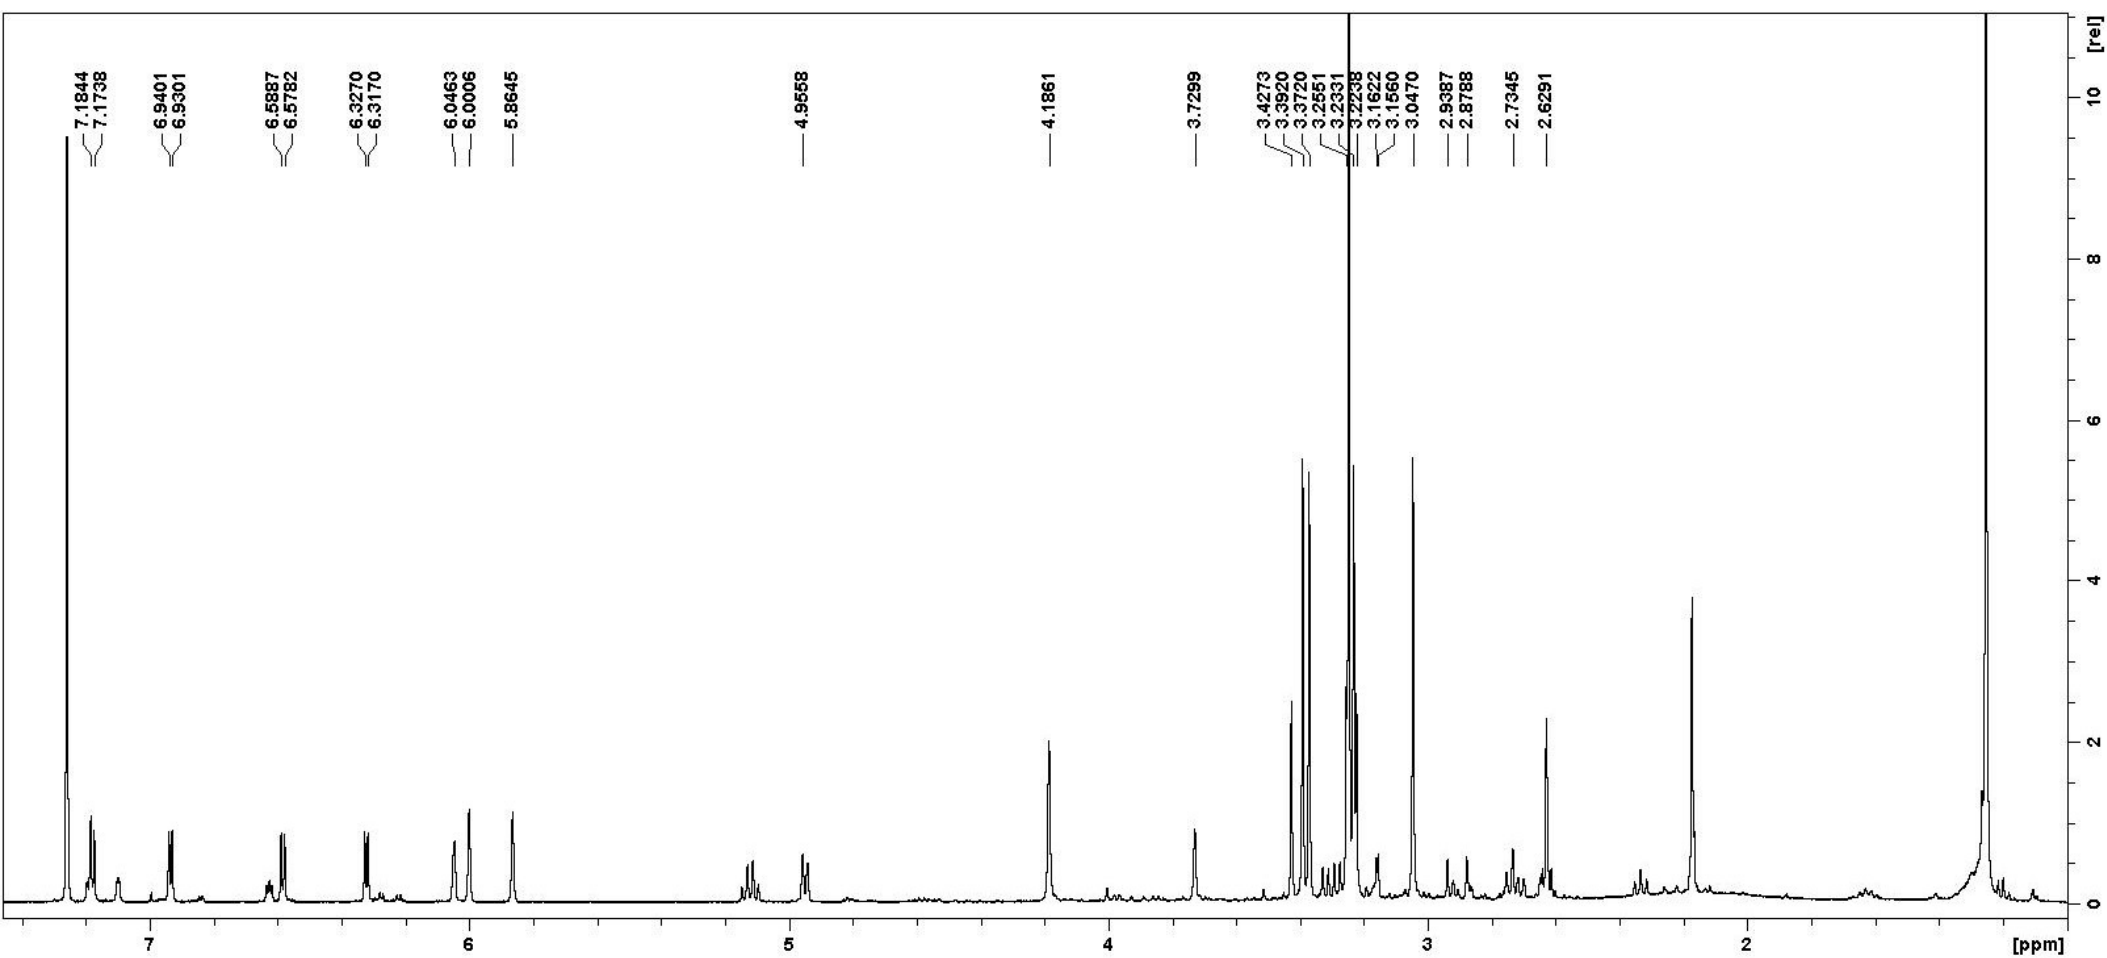

**Figure S5a.** – **2e** + 1 equiv. MsOH, CHCl<sub>3</sub> reflux, 15' – FC final fractions **3e/4e/5e** ~ 3:3:1

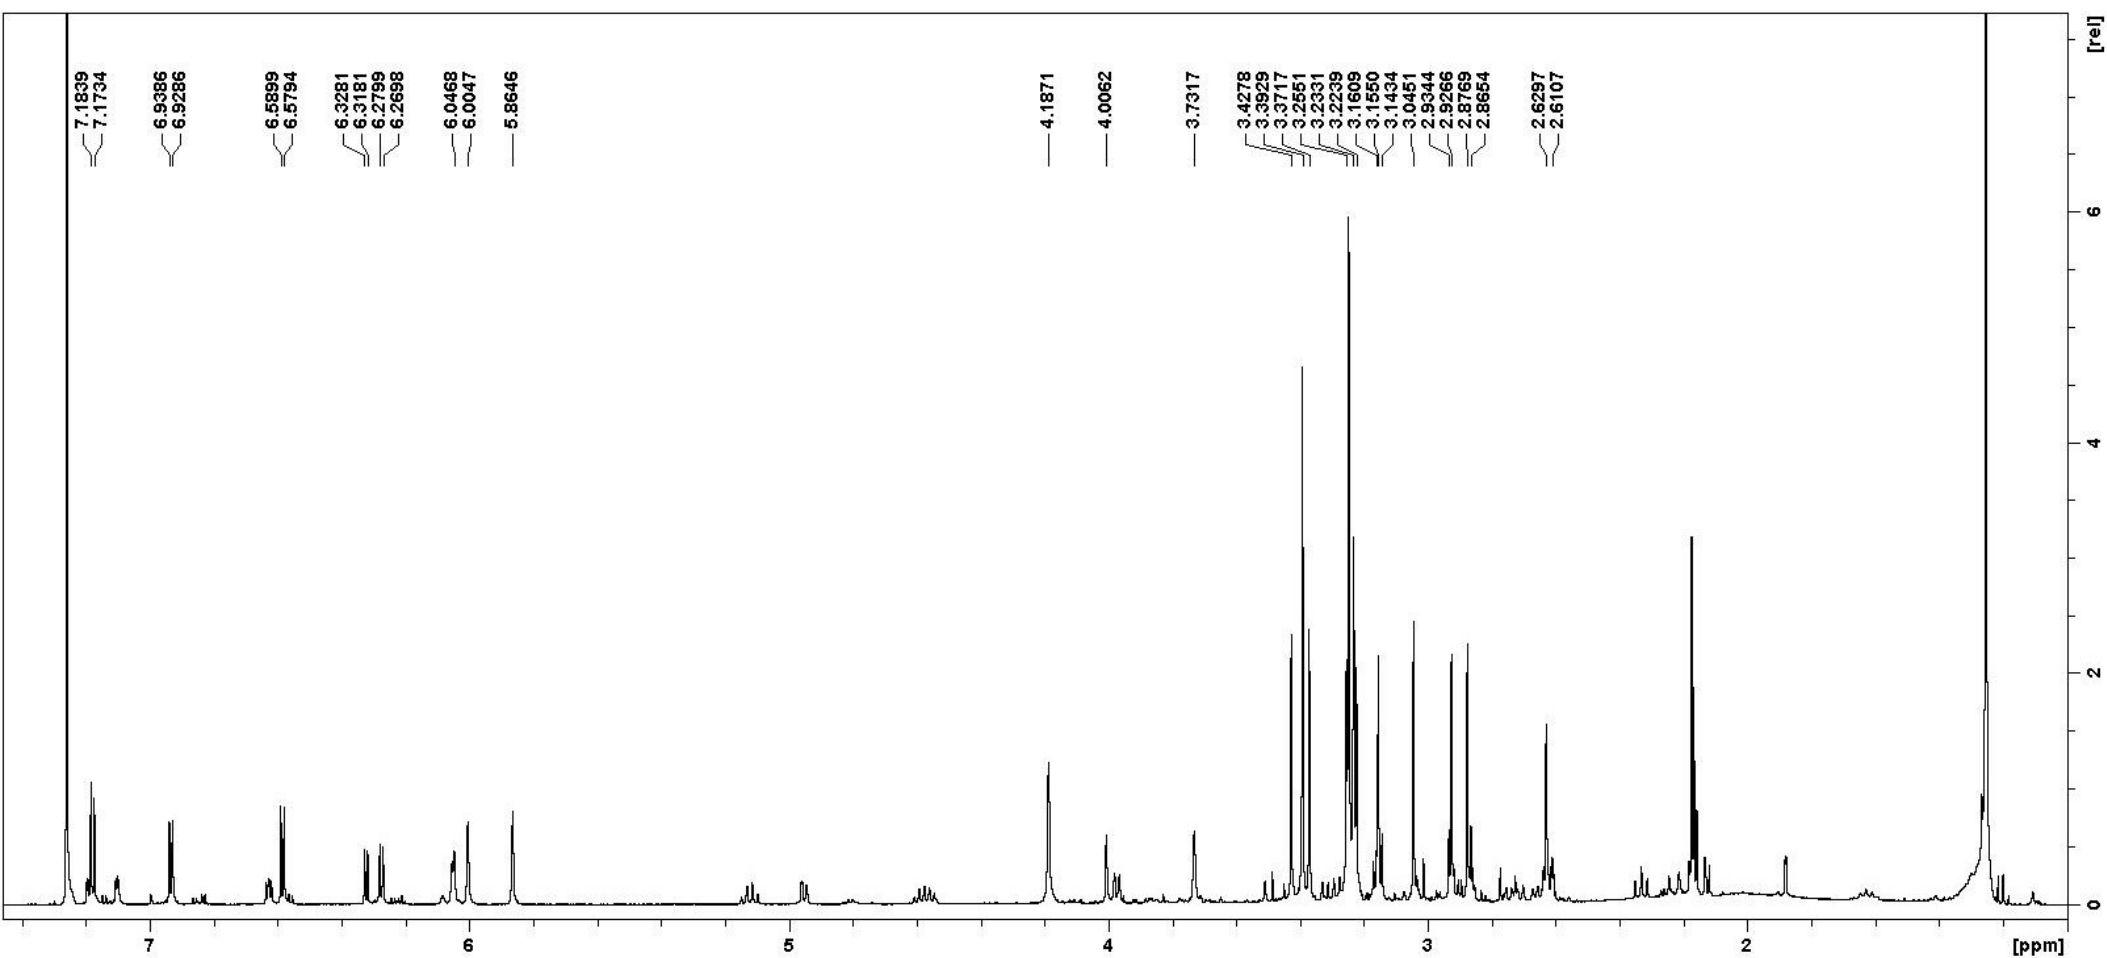

**Figure S5b.** – **2e** + 1 equiv. MsOH, CHCl<sub>3</sub> reflux, 15' – FC final fractions after one week **1e/3e/4e/5e** ~ 1.5:1.5:3:1



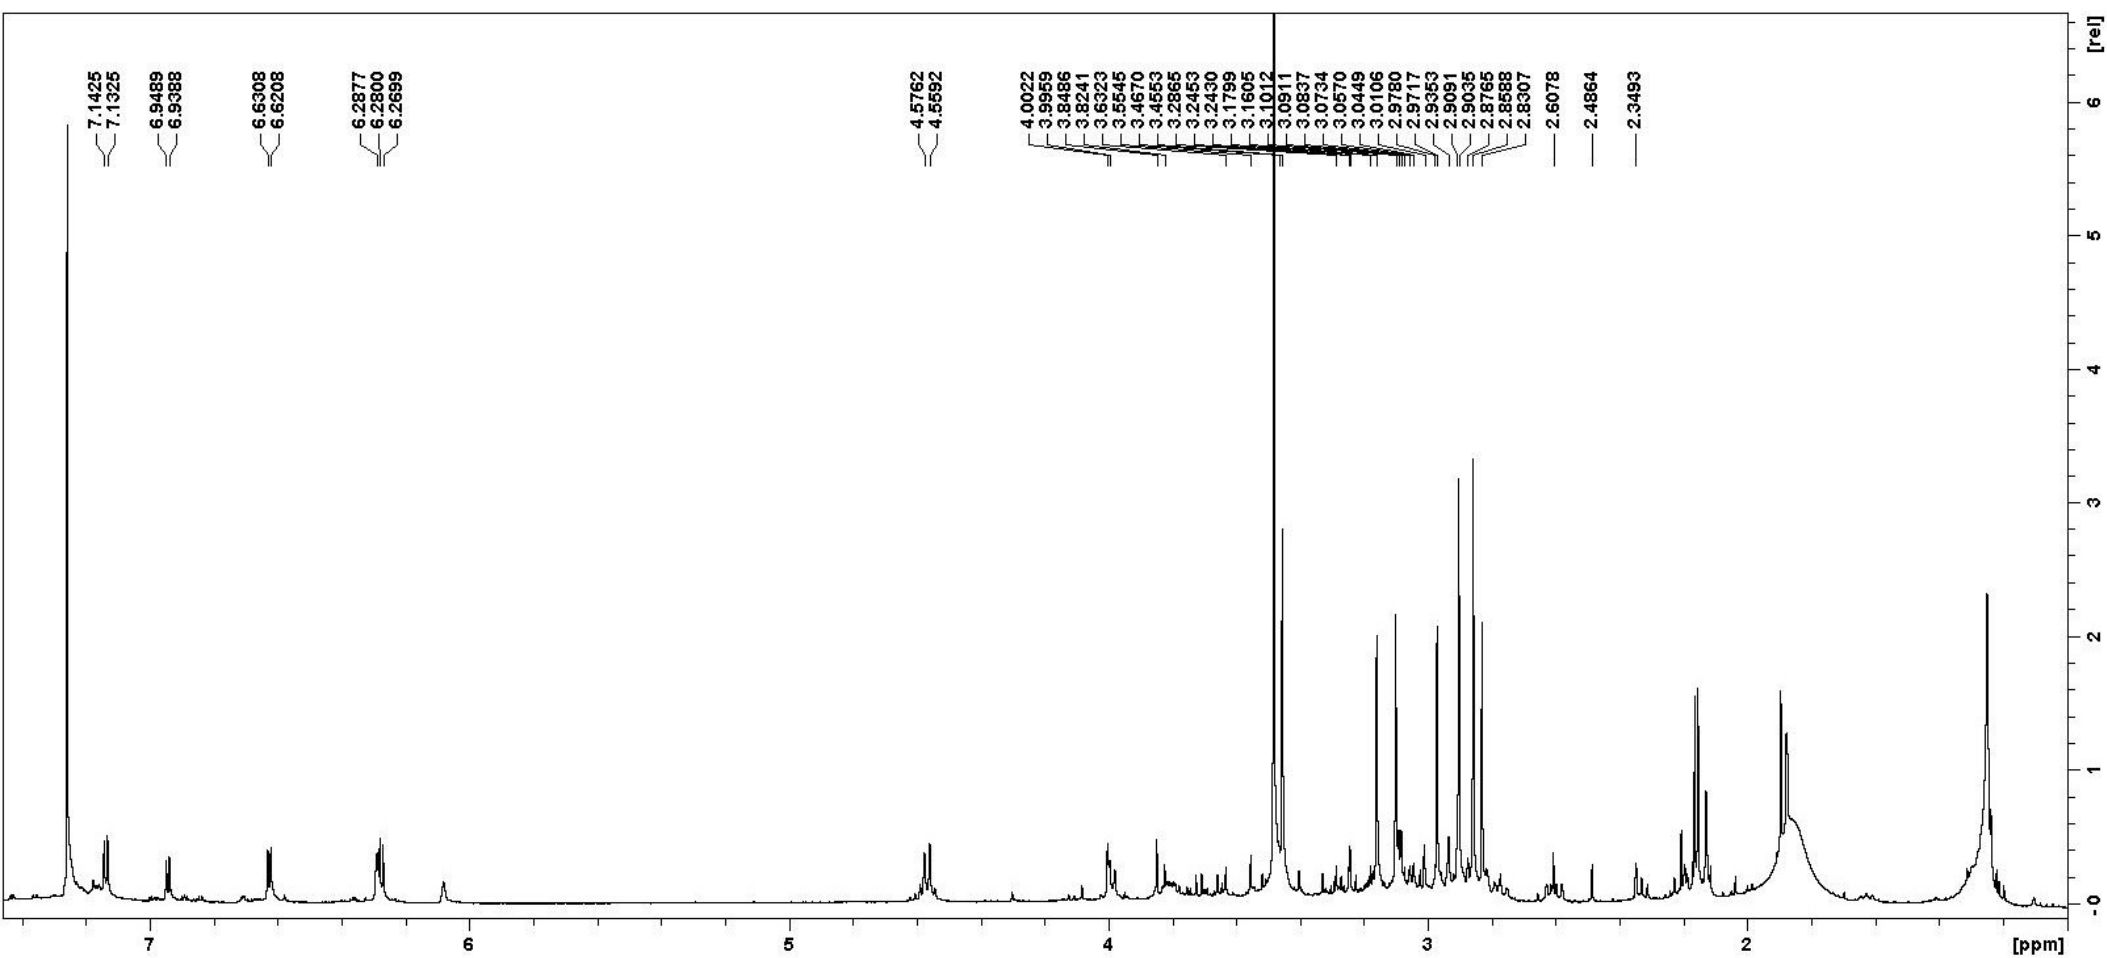

**Figure S5c.** – **2e** + 1 equiv. MsOH, CHCl<sub>3</sub> reflux, 15' – FC final fractions after one month **1e/6e** ~ 3:4

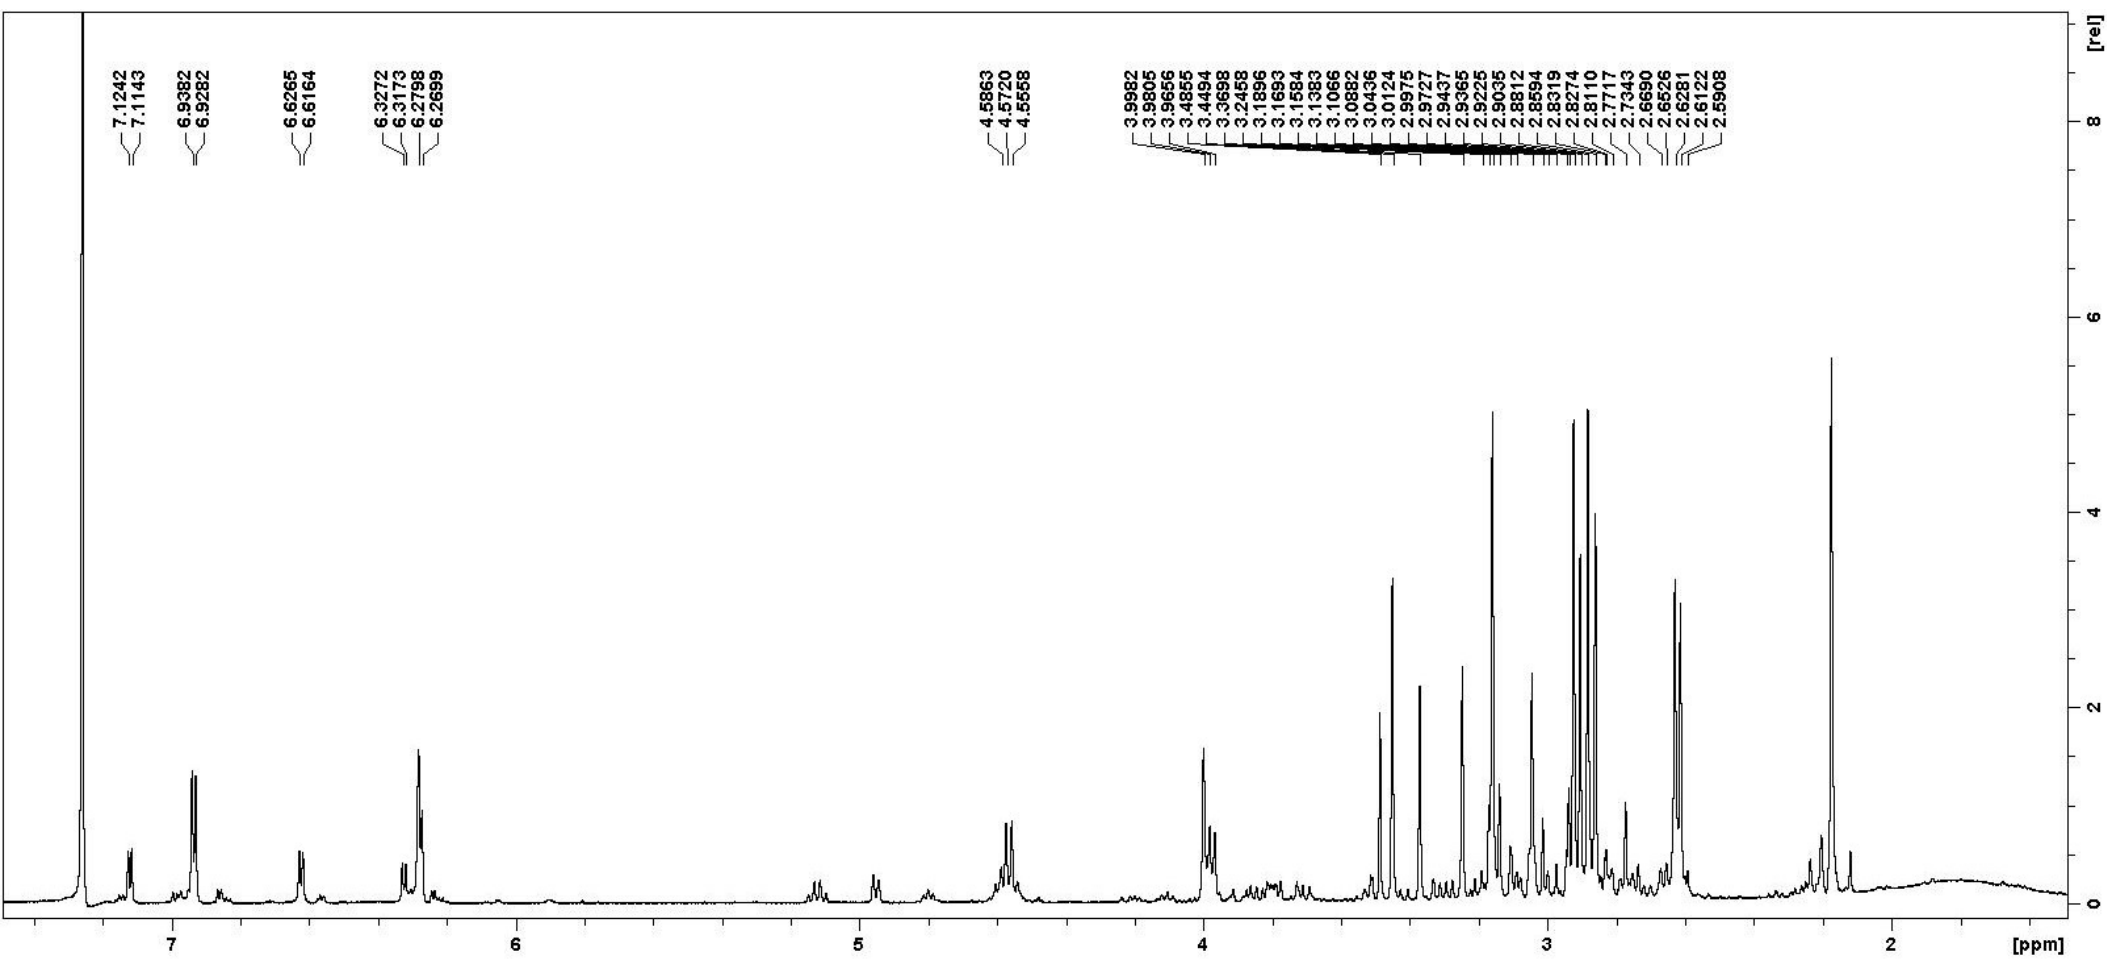

**Figure S5d.** – **2e** + 1 equiv. MsOH, CHCl<sub>3</sub> reflux, 15' – FC central fractions **2e** >> **6e** ~ **3e** >> **1'e**

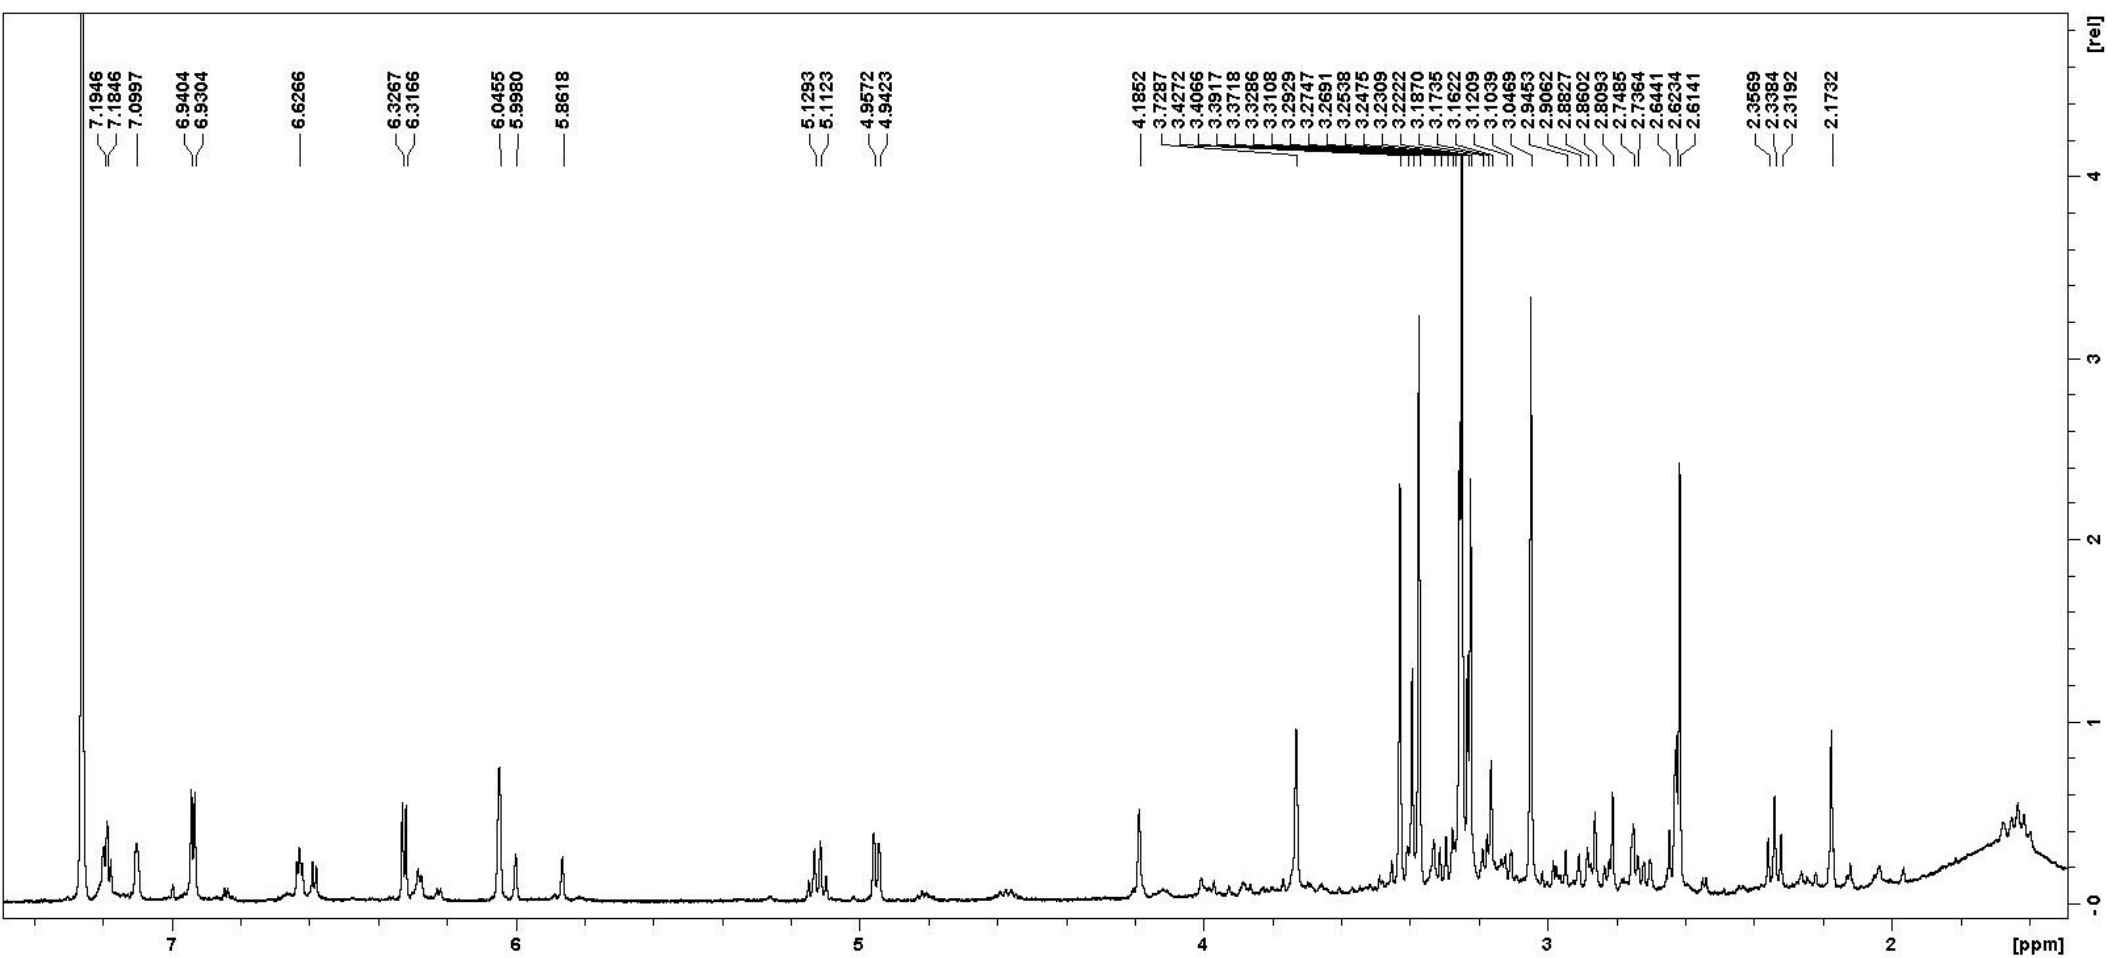

**Figure S5e.** – **2e** + 1 equiv. MsOH, CHCl<sub>3</sub> reflux, 15' – FC final fractions **3e/5e/4e** ~ 4:2.5:1

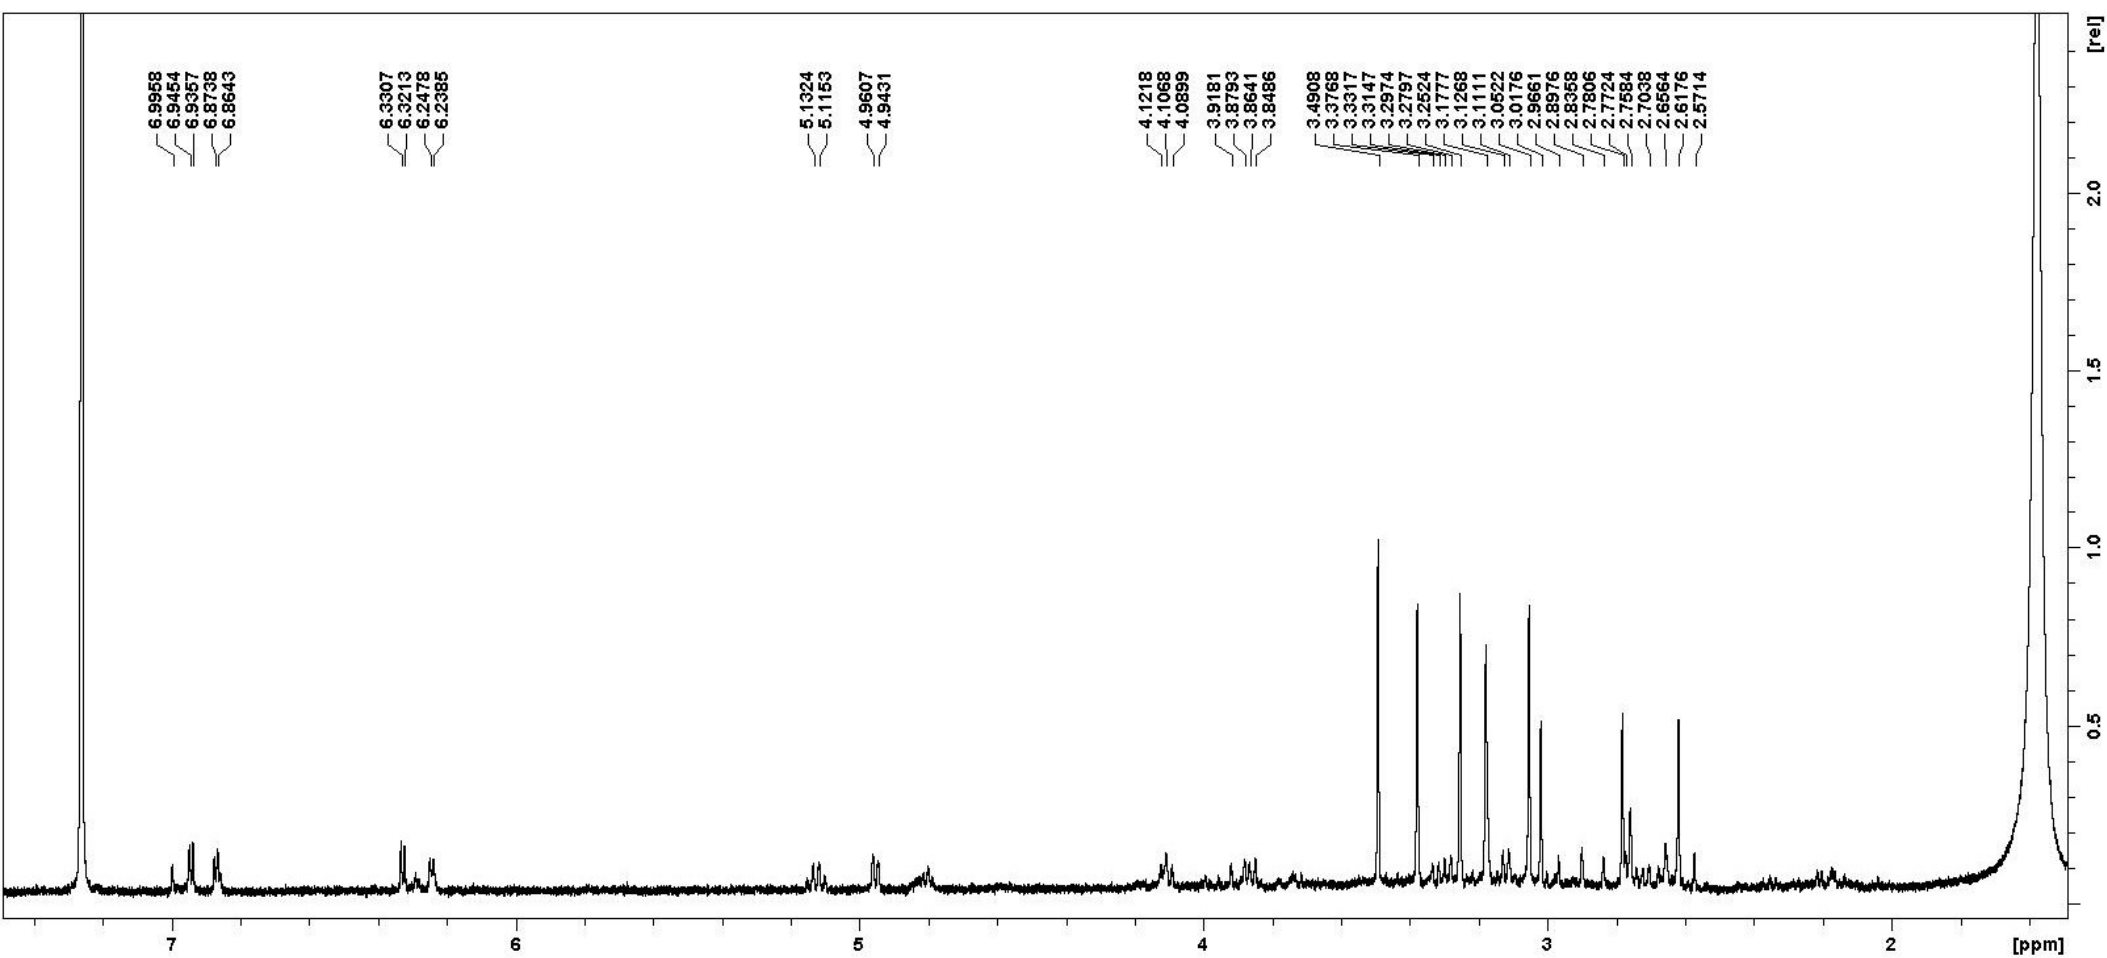

**Figure S5f.** – 2e + 1 equiv. MsOH, CHCl<sub>3</sub> reflux, 15' – FC ff than HPLC  $t_R = 9'$  (3e + 1'e)

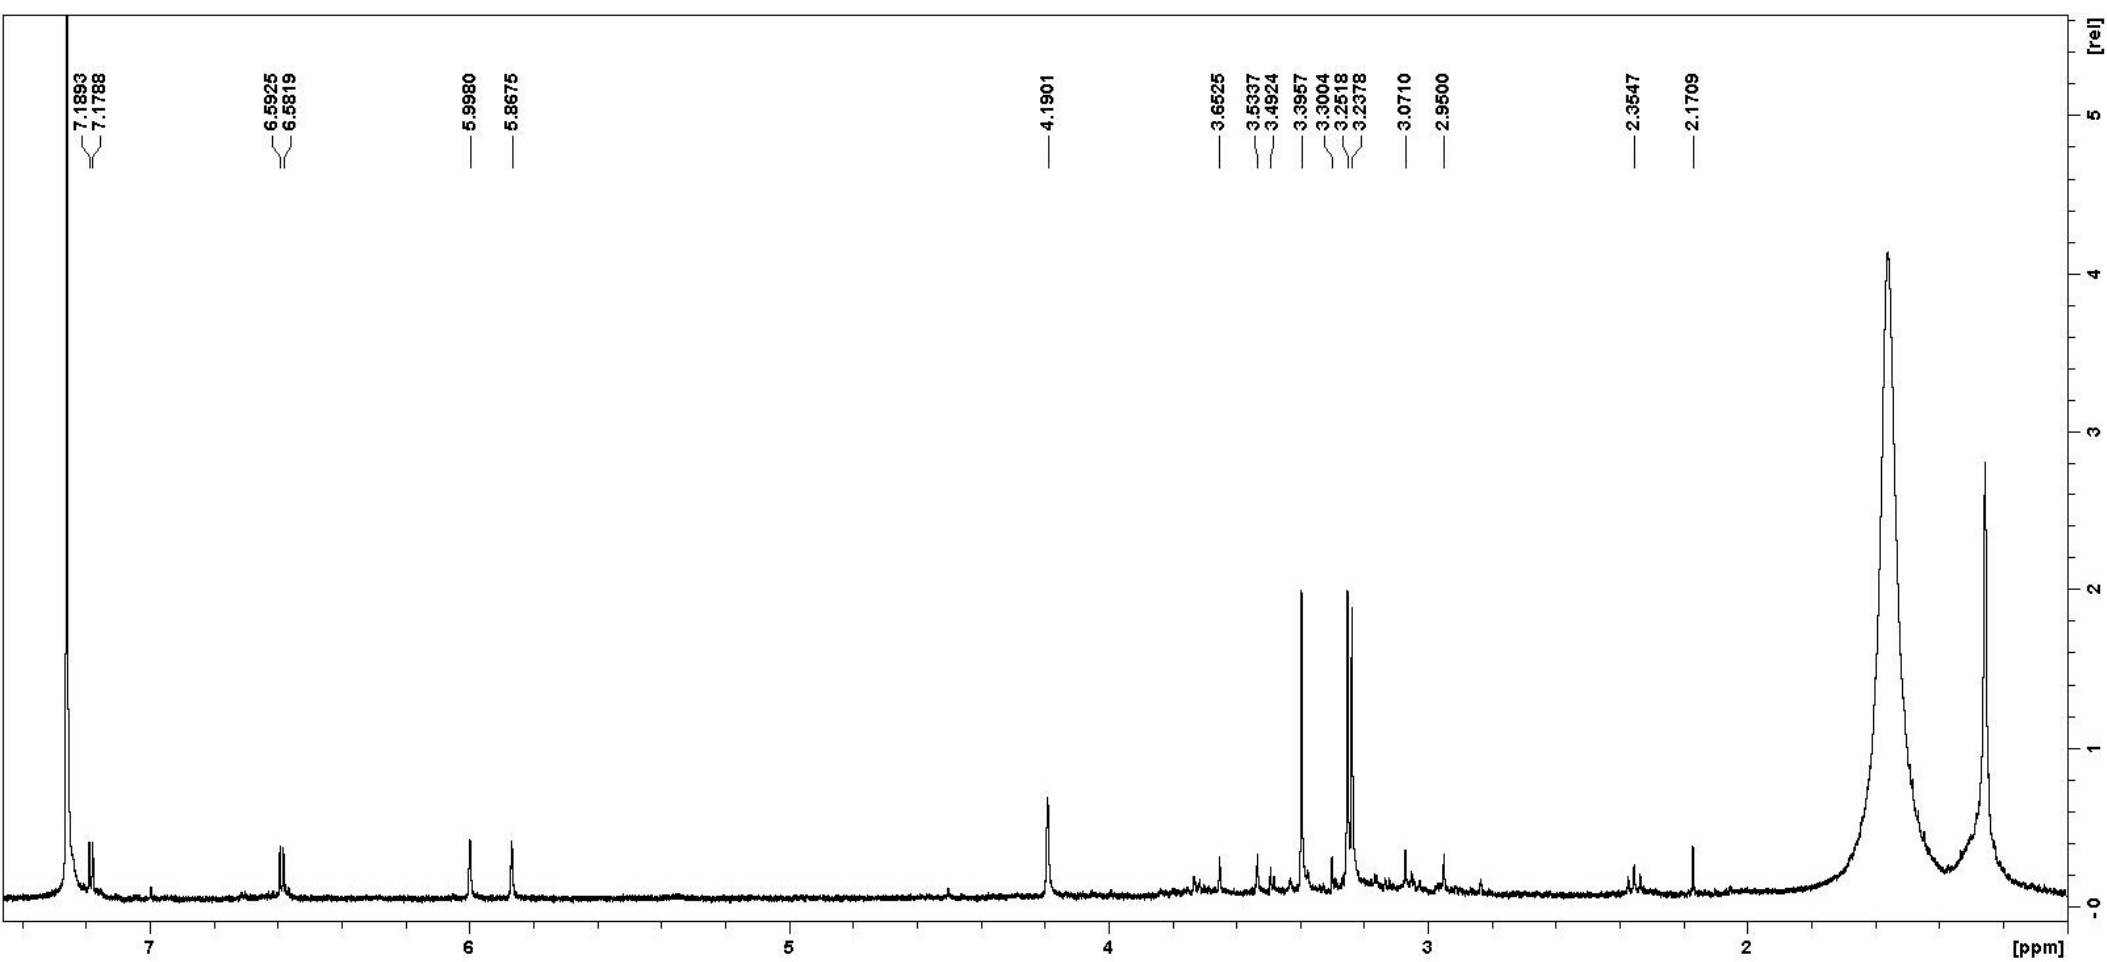

**Figure S5g.** – **2e** + 1 equiv. MsOH, CHCl<sub>3</sub> reflux, 15' – FC ff than HPLC  $t_R = 15'$  **4e**

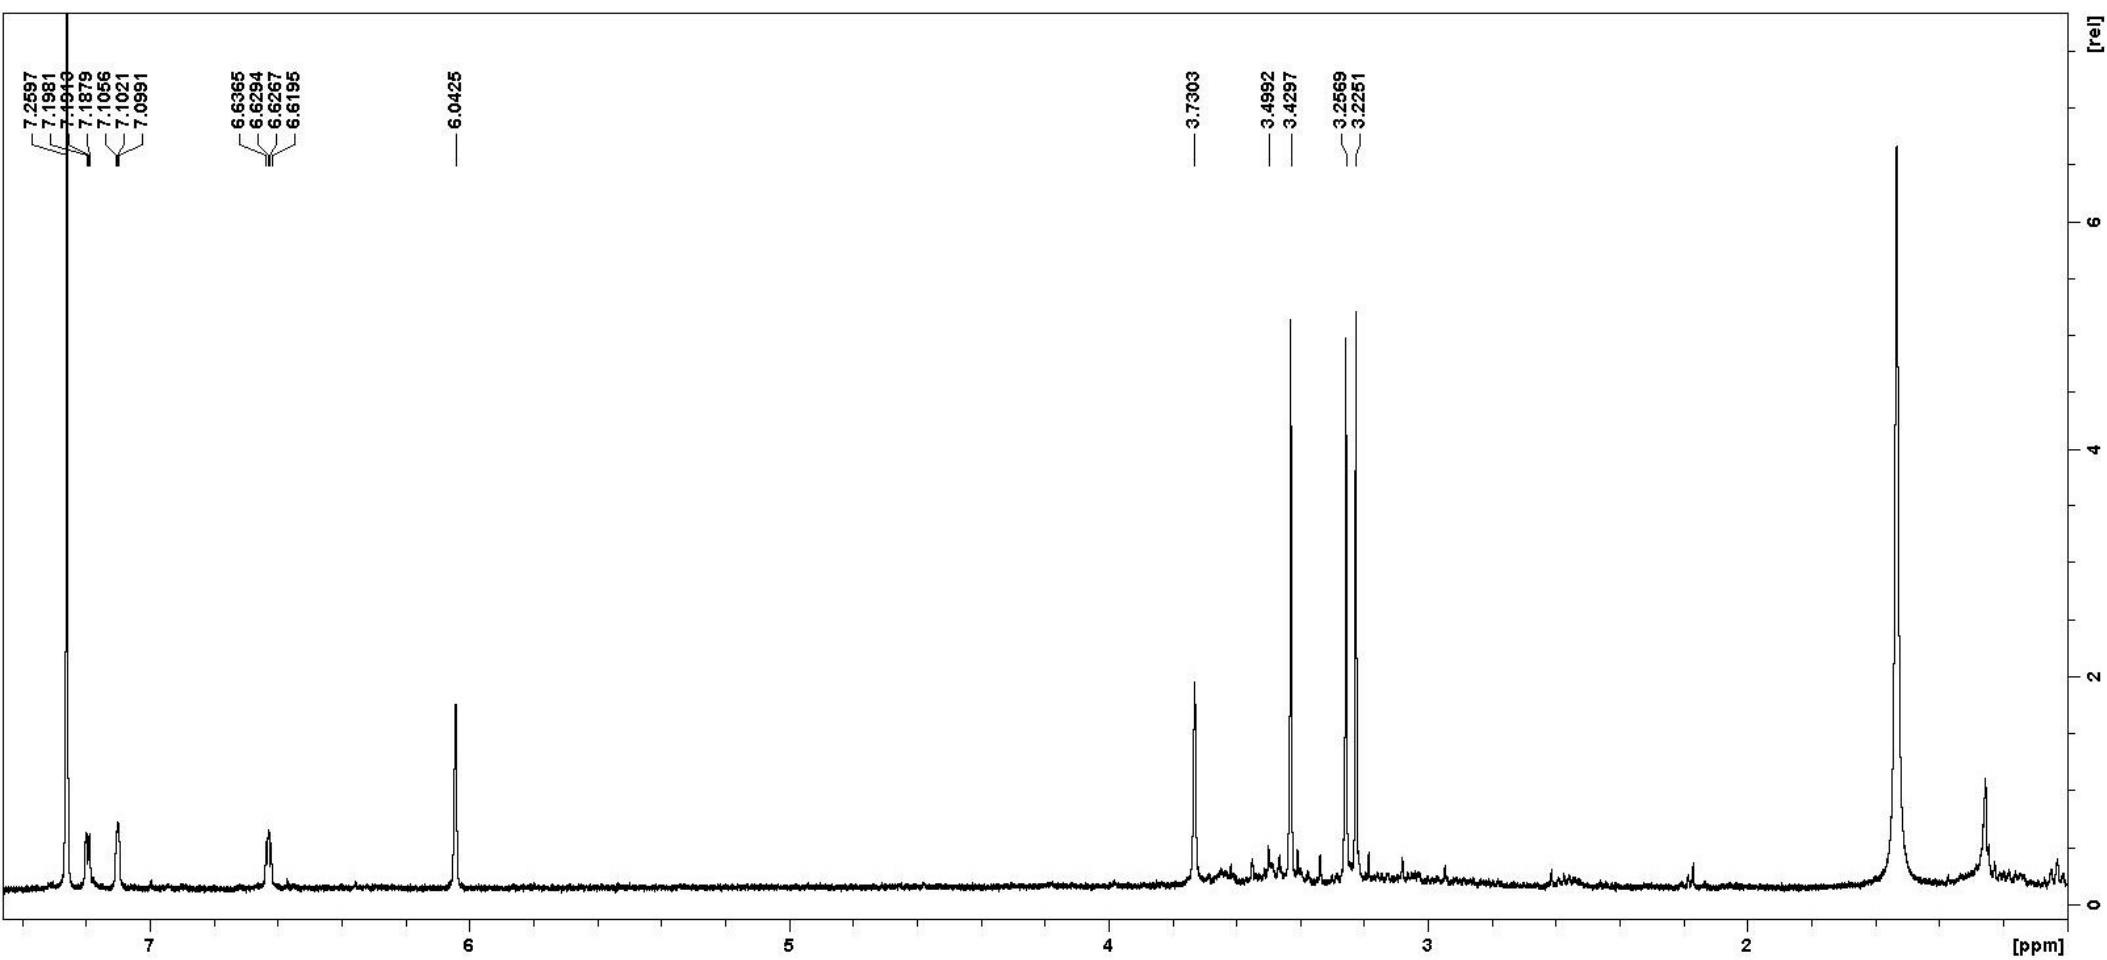

**Figure S5h.** – 2e + 1 equiv. MsOH, CHCl<sub>3</sub> reflux, 15' – FC ff than HPLC  $t_R = 19'$  5e

| Reaction | Conditions                                     | Compounds by <sup>1</sup> H-NMR          | Compound, t <sub>R</sub> and possible [M+H] <sup>+</sup> (m/z) by LC-DAD-MS experiments. Style by UV bands. |                                               |                                        |                                     |
|----------|------------------------------------------------|------------------------------------------|-------------------------------------------------------------------------------------------------------------|-----------------------------------------------|----------------------------------------|-------------------------------------|
| -        | Mix of known compounds                         | <b>6e 1 1d 1m 1e 2m 2e</b>               | <u>6e/14.5</u> 1/15.9 1d/17.6 1m/19.1 1e/21.3 2m/25.5 2e/29.2                                               |                                               |                                        |                                     |
| R6       | 2e + 0.1eq.MsOH, CHCl <sub>3</sub> , 70°, 24h  | 4e(2%) 3e(90%) 2e(10%)                   | 2'e/19.9                                                                                                    | <u>4e/24.2</u>                                | 3e/25.9                                | 2e/28.6                             |
| R7       | 2e + 0.5eq.MsOH, CHCl <sub>3</sub> , 70°, 24h  | 3e ~ 1e 40% -- 4e 10% -- 6e 8% - 5e (2%) | 1'e/13.6(369-71)<br>1e/20.3(369-71)                                                                         | <u>6e/14.1(273)</u><br><u>4e/23.9(351-53)</u> | <u>5e/14.4(273)</u><br>3e/25.7(351-53) | 2'e/19.5(383-85)<br>2e/28.4(383-85) |
| R8       | 2e + 1.1eq.MsOD, CDCl <sub>3</sub> , 70°, 1.5h | 6e (70%), 5e (30%)                       |                                                                                                             | <u>6e/14.1(273)</u>                           | <u>5e/14.3(273)</u>                    |                                     |
| R9       | 2e + 0.8eq.MsOH, CHCl <sub>3</sub> , 70°, 1.2h | (First aliquot after 15')                |                                                                                                             | <u>6e/14.1</u><br><u>4e/23.9</u>              | <u>5e/14.3</u><br>3e/25.7              | 2e/28.3                             |
|          |                                                | 6e (95%), 5e (5%)                        |                                                                                                             | <u>6e/14.1(273)</u>                           | <u>5e/14.3(273)</u>                    |                                     |

**Figure S6a.** Table 1. Comparison of four reactions according to chromatographic and spectroscopic results. Retention times may differ slightly depending on eluent preparation and day of acquisition.

Style normal: substrates  $\lambda_{\max} \sim 200, 230, 280$  and  $\epsilon_{200} > \epsilon_{280} > \epsilon_{230}$ ; style underline: products  $\lambda_{\max} \sim 230, 280$  and  $\epsilon_{230} > \epsilon_{280}$ ; style italics: compound  $\lambda_{\max} \sim 200, 230, 280$  and  $\epsilon_{200} > \epsilon_{230} > \epsilon_{280}$ .

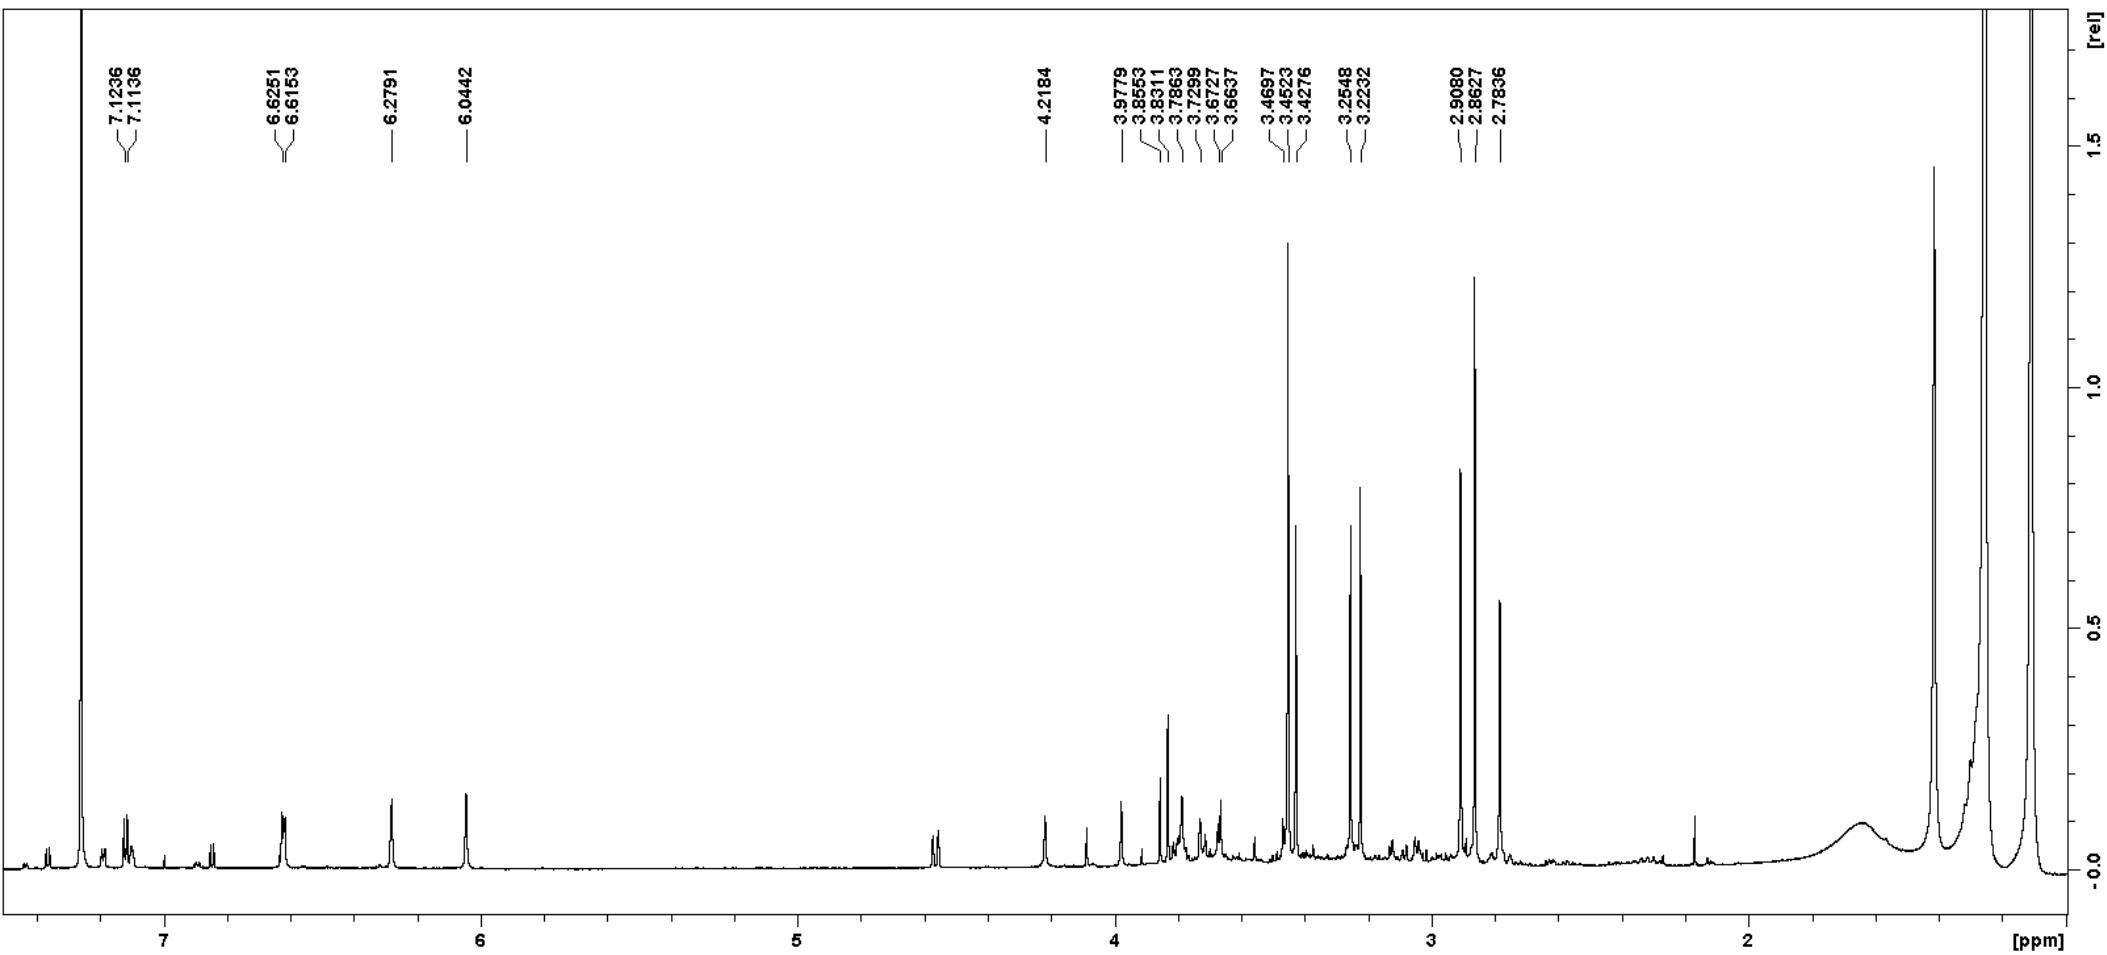

**Figure S6b.** – **2e** in CDCl<sub>3</sub> reflux, 1.1 equiv. MsOD, 90' **6e/5e** ~ 70:30 ; see also **S4b-e**



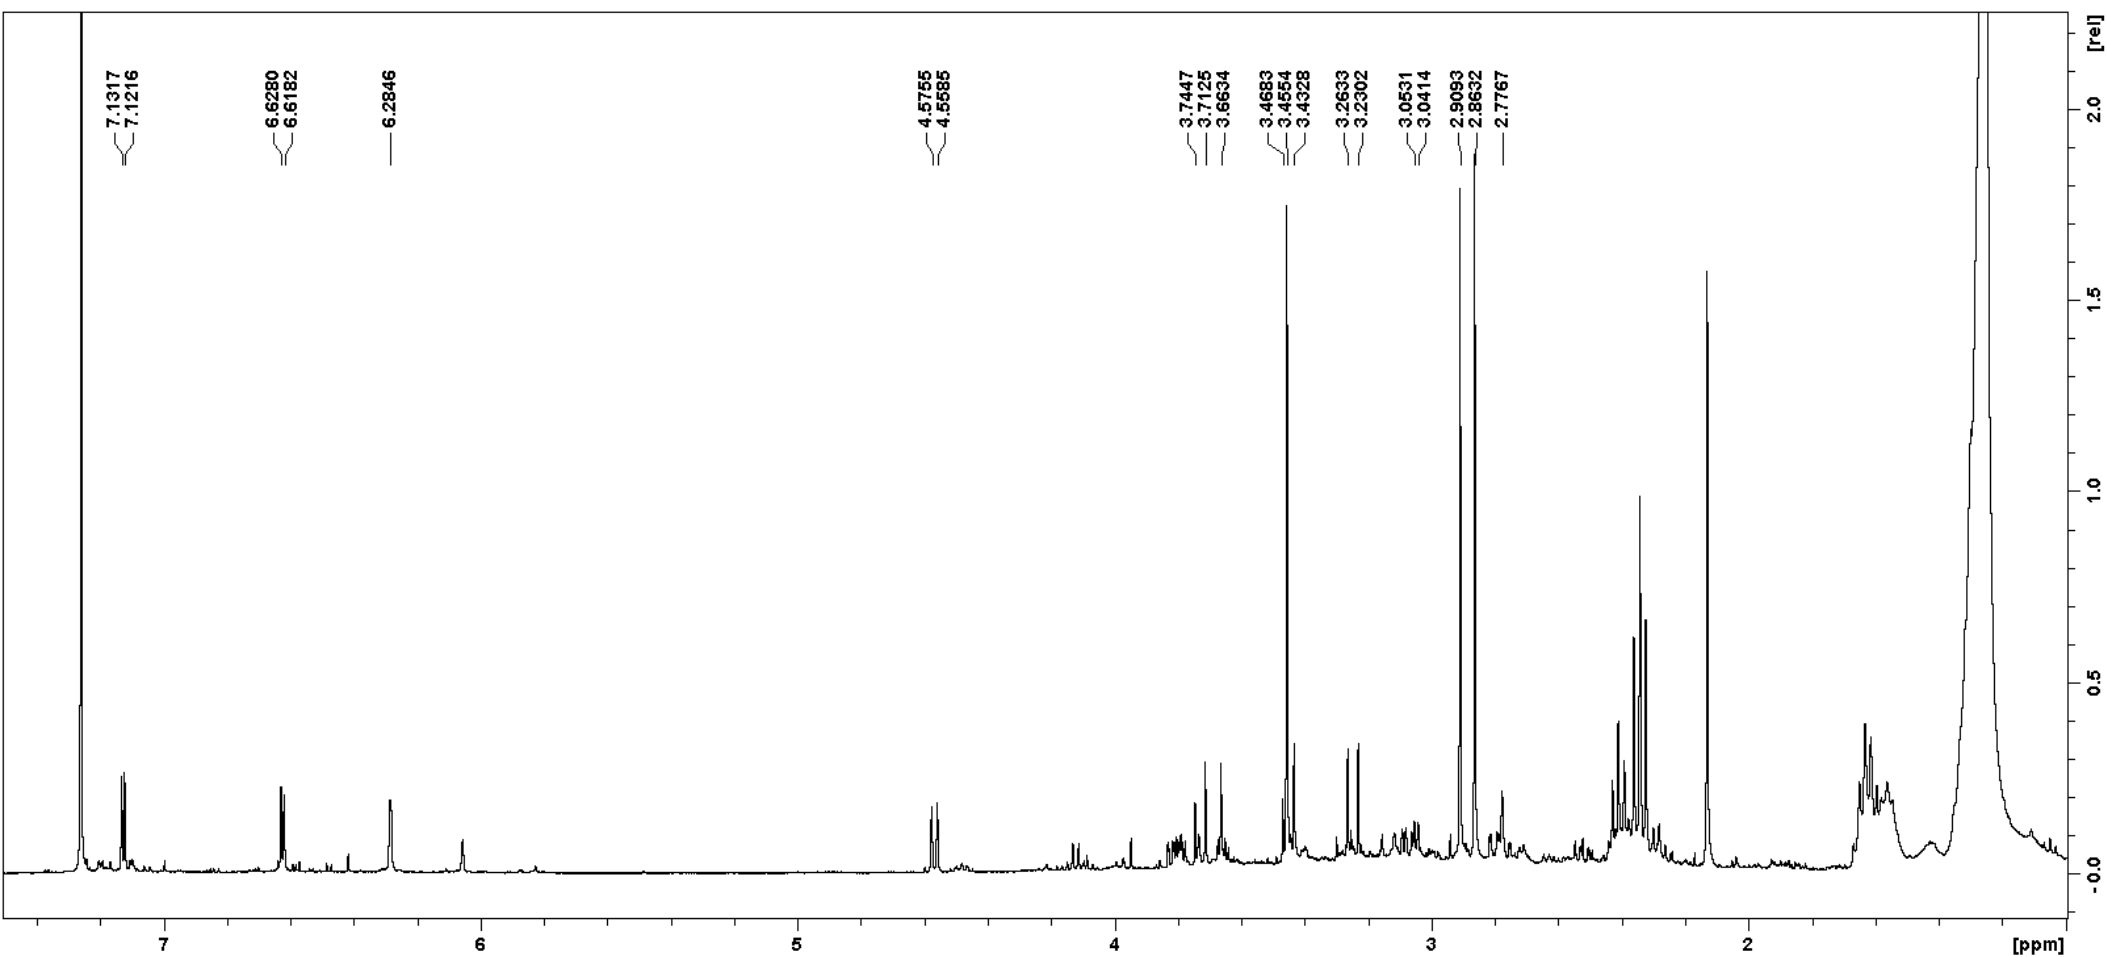

**Figure S6c.** – 2e in CHCl<sub>3</sub> reflux, 0,8 equiv. MsOH, 75' 6e/5e ~ 95:5

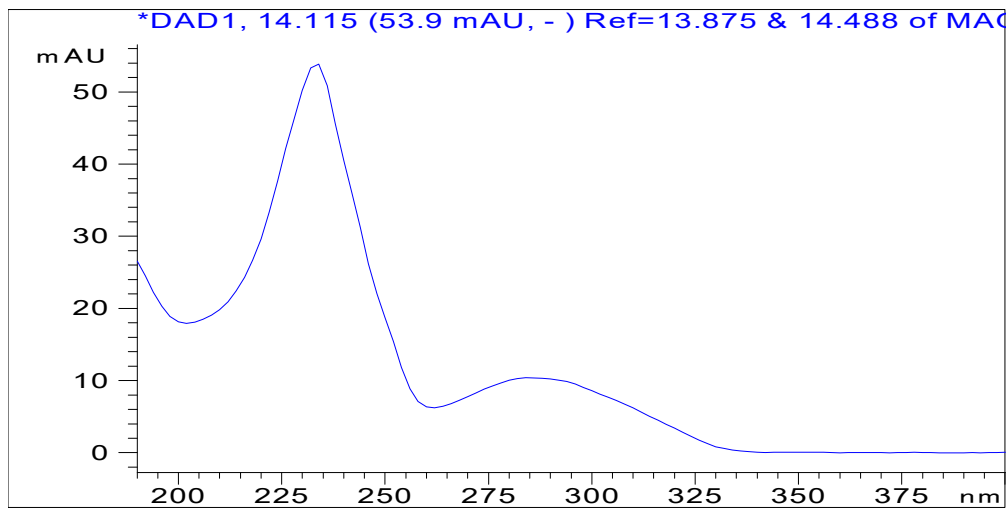

**Figure S6d.** HPLC-DAD UV spectrum of **6e**  
HPLC-DAD UV spectrum of **1d**

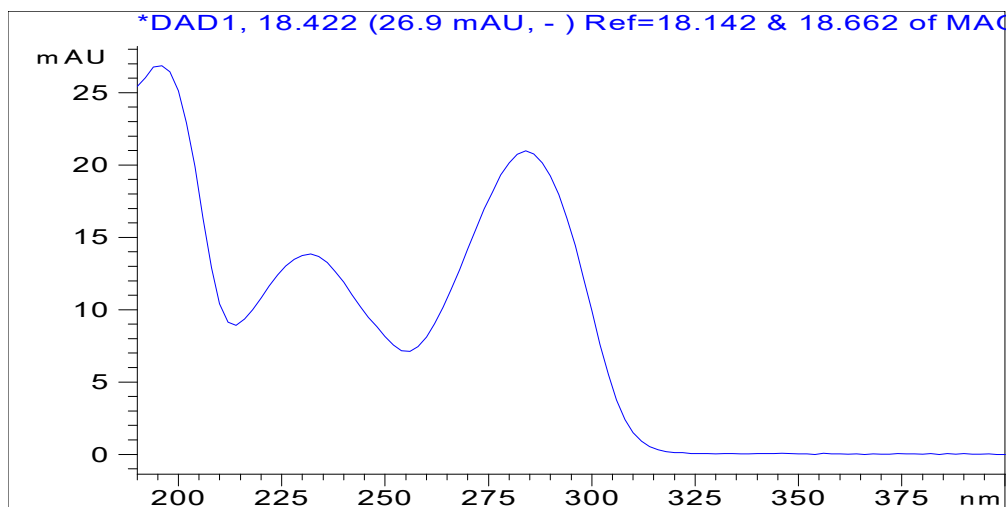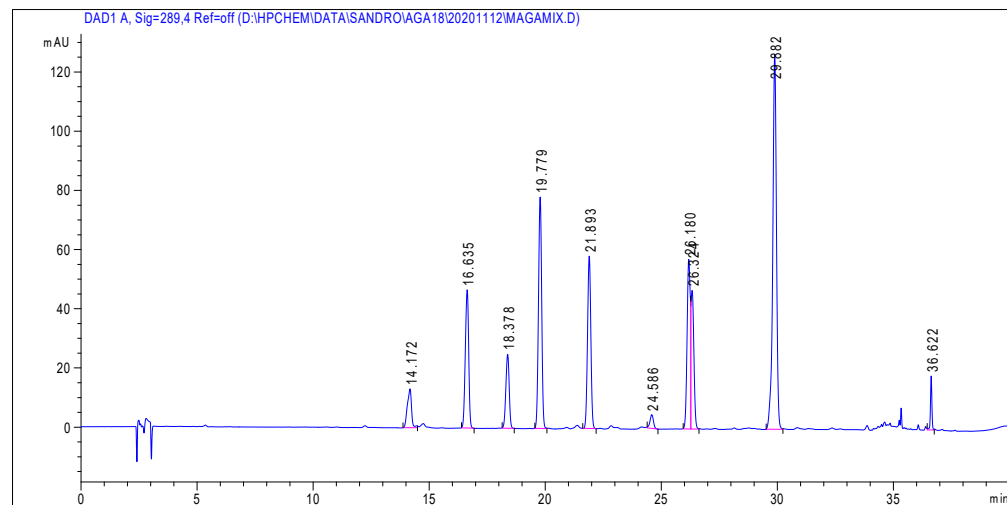

HPLC chromatogram at  $\lambda = 289$  nm of **6e**, **1**, **1d**, **1m**, **1e**, **2m**, **2e**,  
HPLC-DAD UV spectrum of **1**

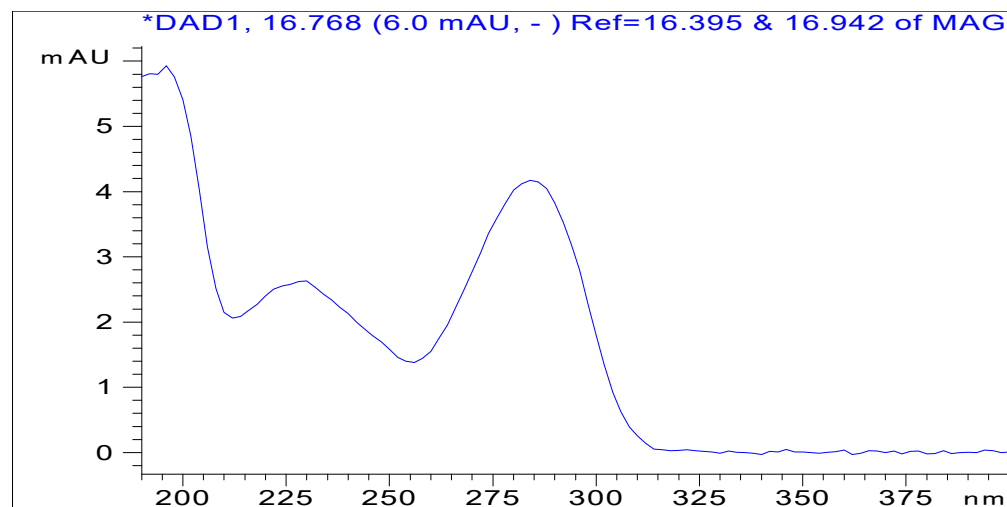

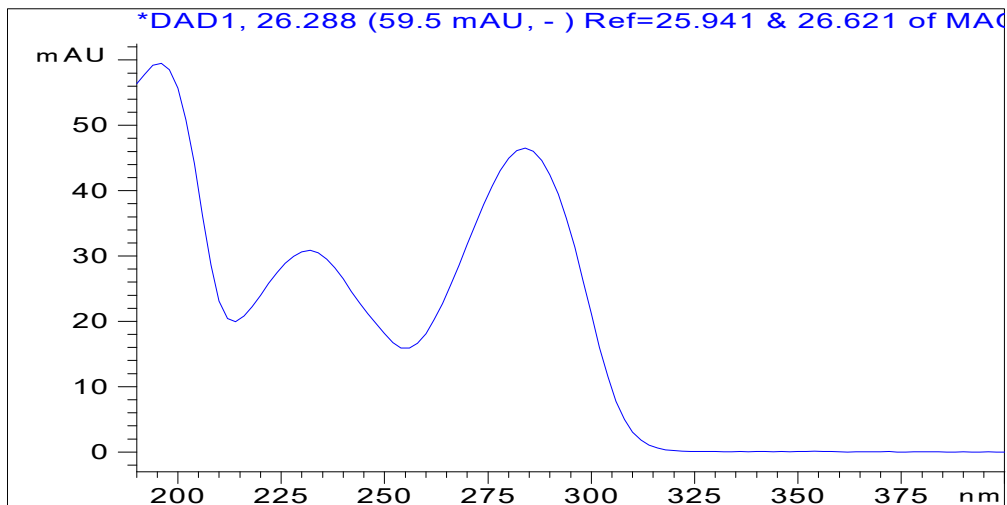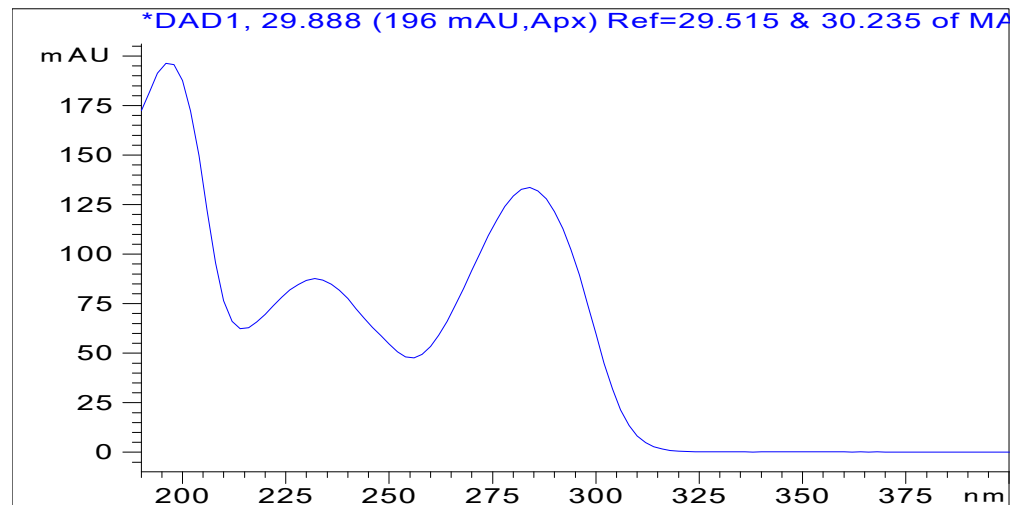

**Figure S6e.**

HPLC-DAD UV spectrum of **2m**  
HPLC-DAD UV spectrum of **1m**

HPLC-DAD UV spectrum of **2e**  
HPLC-DAD UV spectrum of **1e**

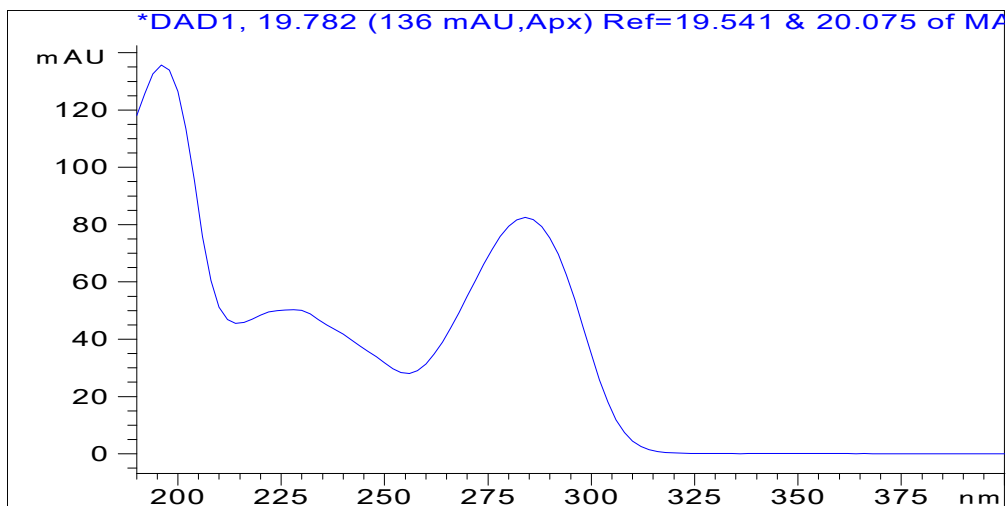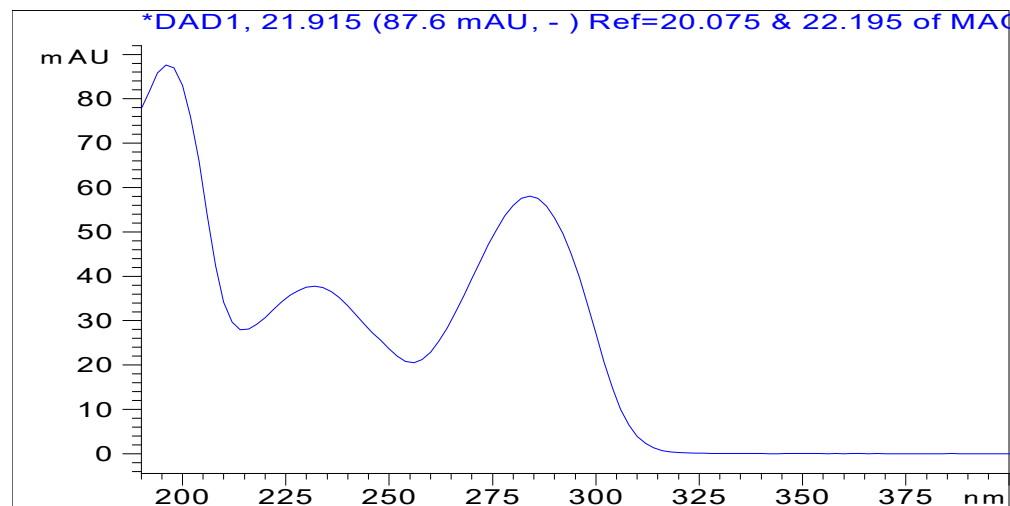

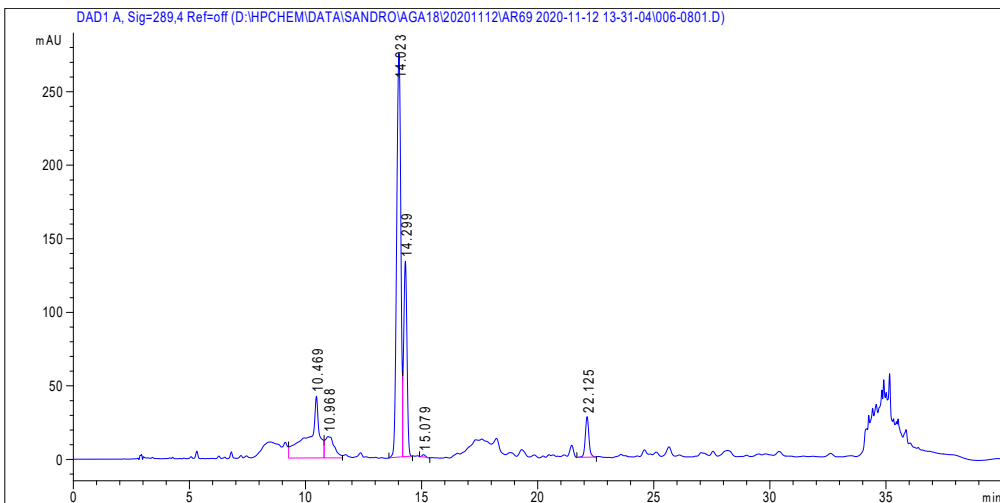

**Figure S6f.**

HPLC chromatogram at  $\lambda = 289$  nm of **R8**  
HPLC chromatogram at  $\lambda = 289$  nm of **R9-1**

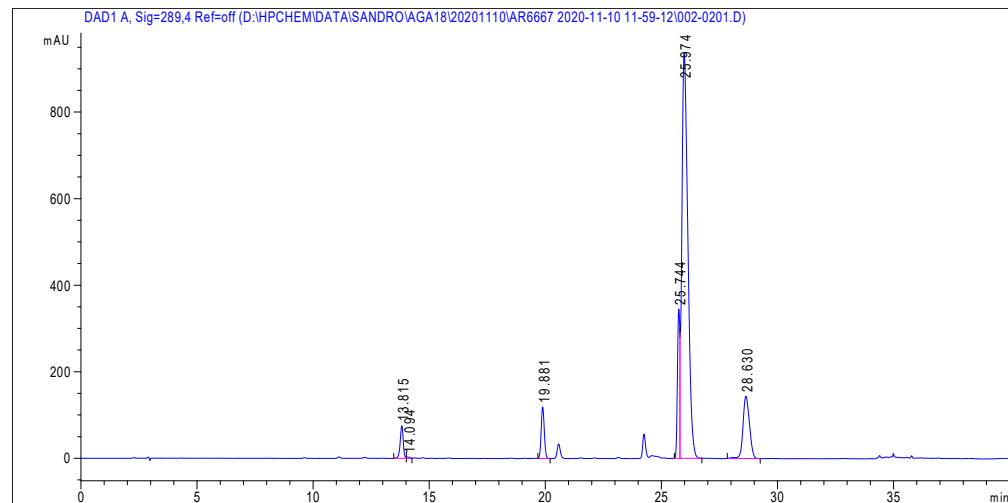

HPLC chromatogram at  $\lambda = 289$  nm of **R6**  
HPLC chromatogram at  $\lambda = 289$  nm of **R7**

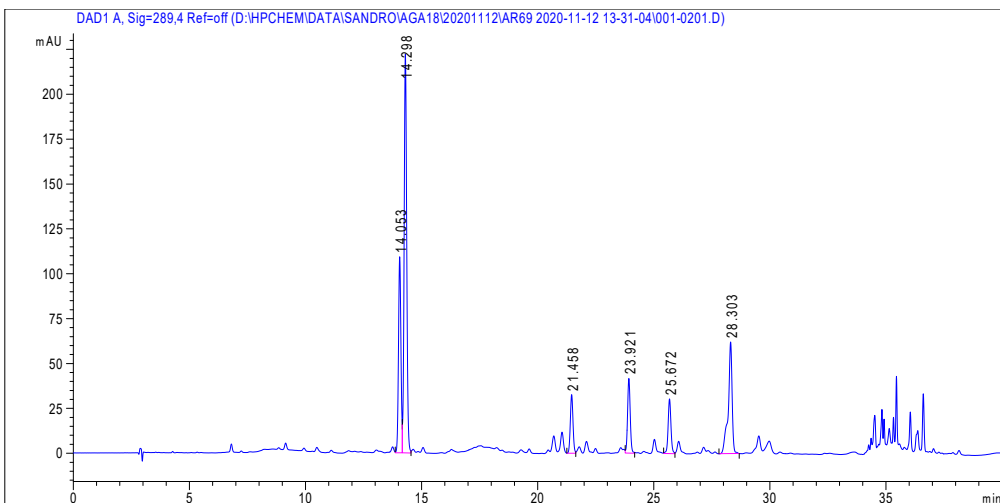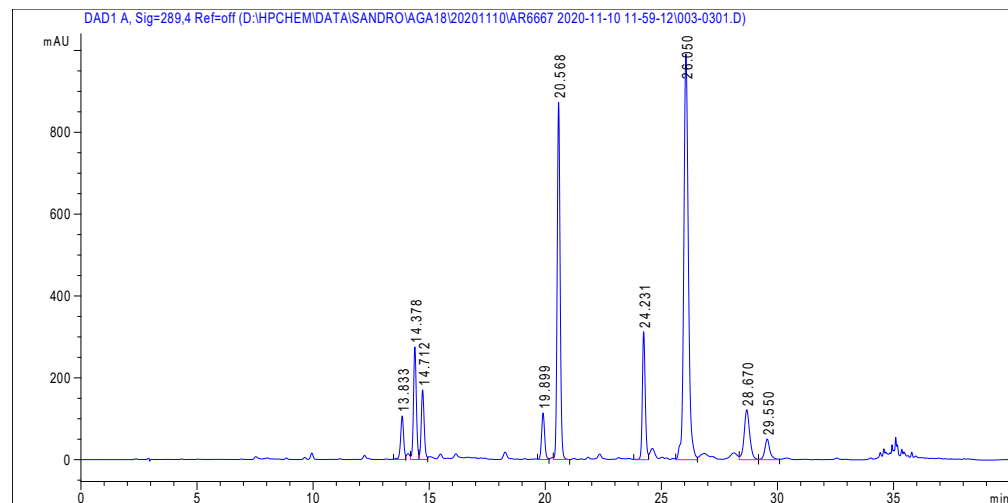

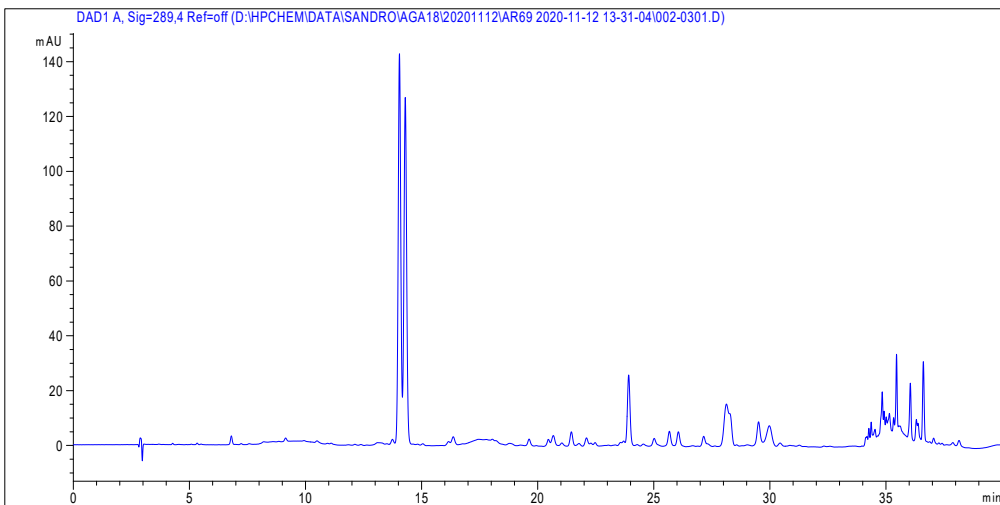

**Figure S6g.** HPLC chromatogram at  $\lambda = 289$  nm of **R9-2**  
HPLC chromatogram at  $\lambda = 289$  nm of **R9-4**

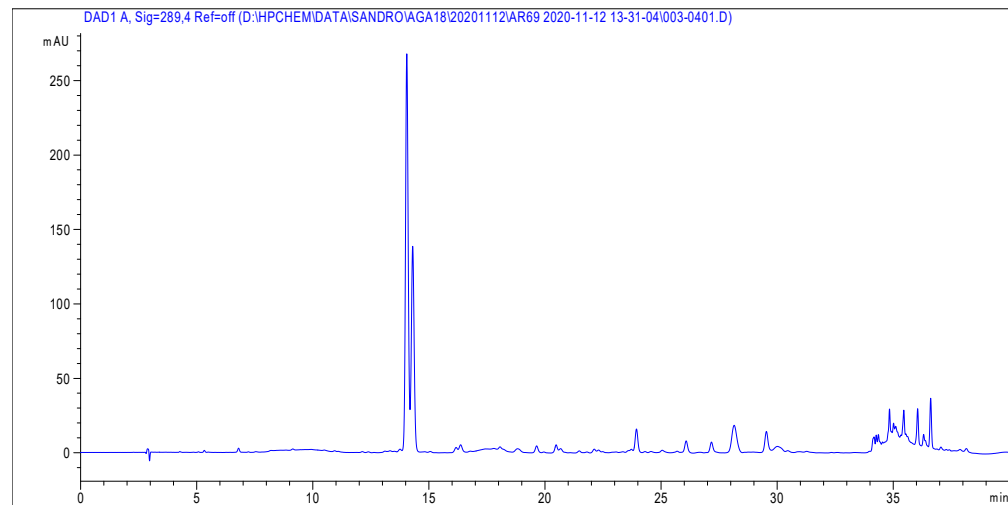

HPLC chromatogram at  $\lambda = 289$  nm of **R9-3**  
HPLC chromatogram at  $\lambda = 289$  nm of **R9-5**

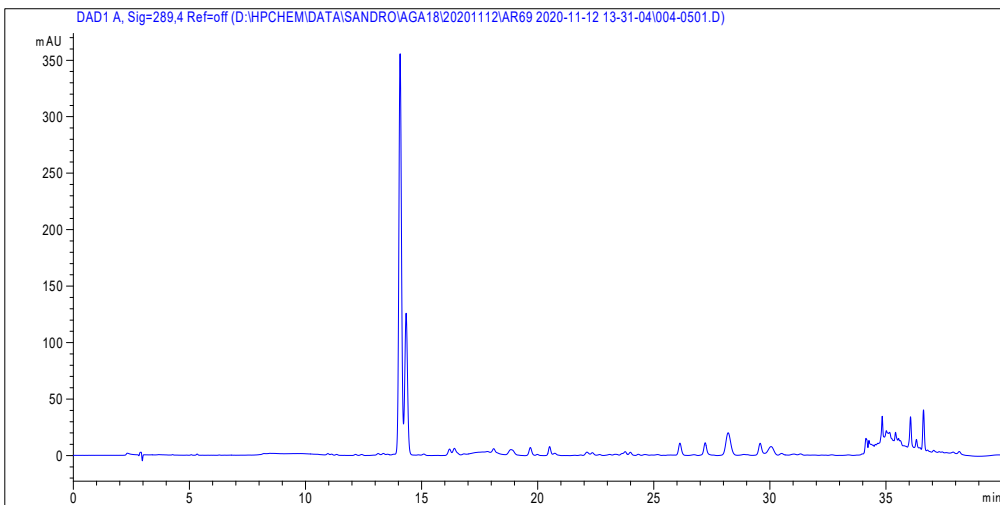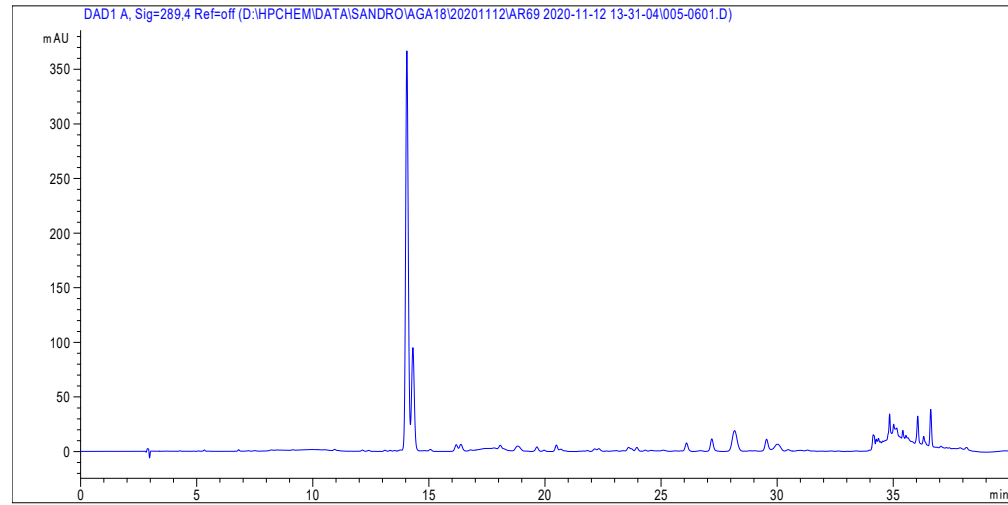

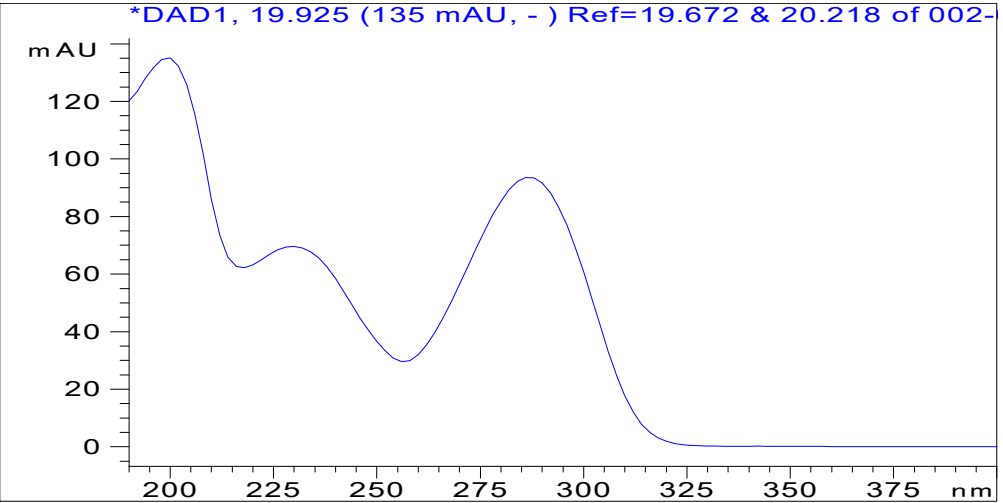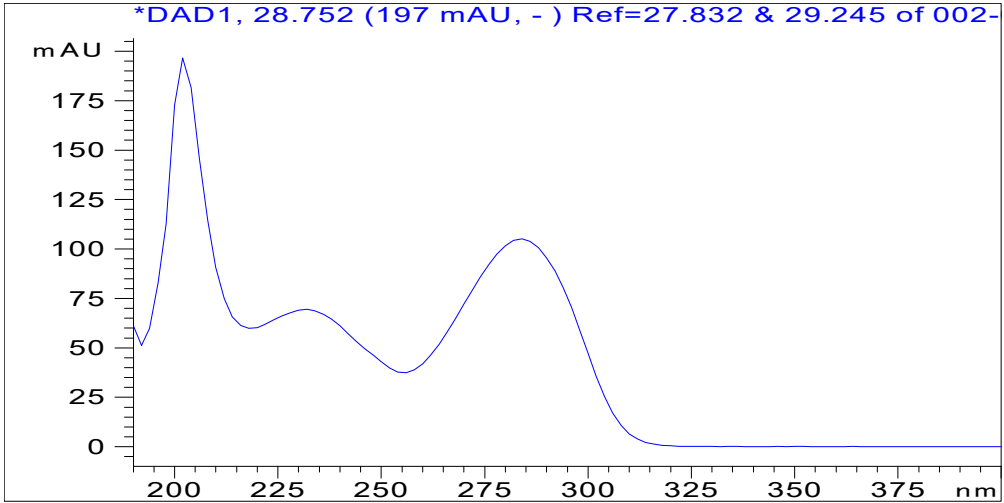

**Figure S6h.** HPLC-DAD UV spectrum of **R6 2'e**  
HPLC-DAD UV spectrum of **R6 4e**

HPLC-DAD UV spectrum of **R6 2e**  
HPLC-DAD UV spectrum of **R6 3e**

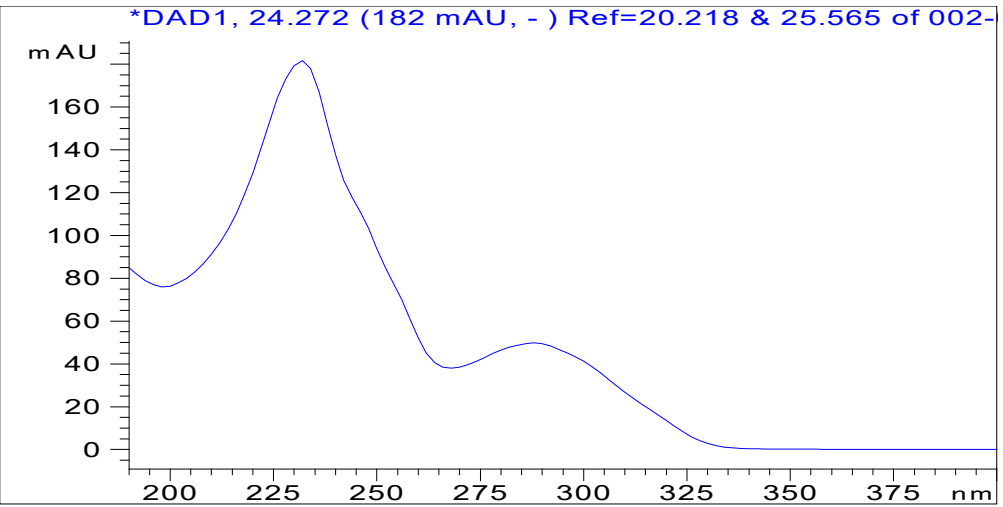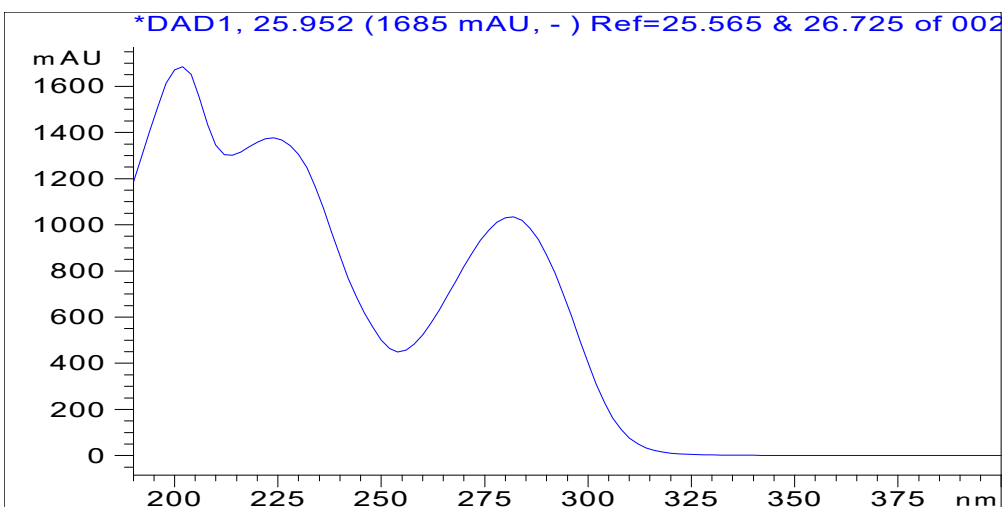

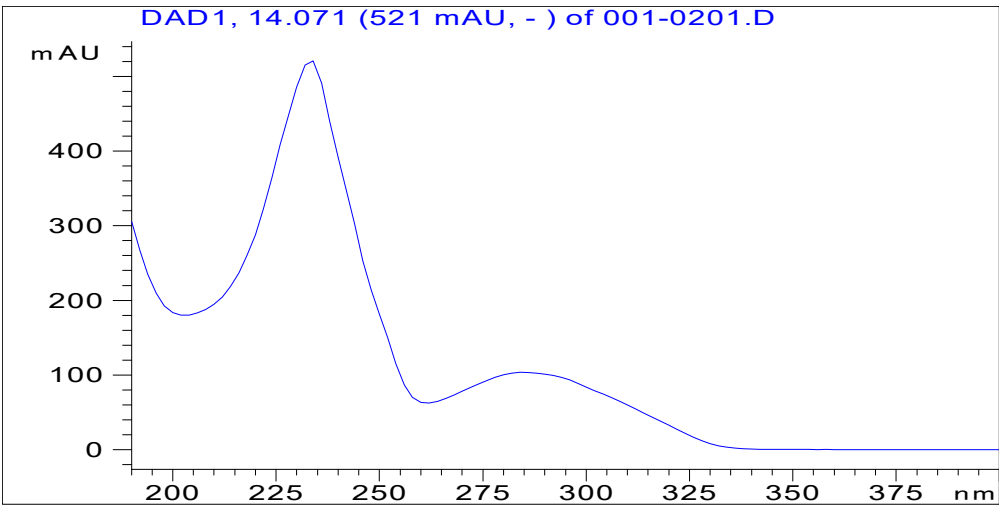

**Figure S6i.** HPLC-DAD UV spectrum of **R9-1 6e**  
HPLC-DAD UV spectrum of **R9-1 4e**

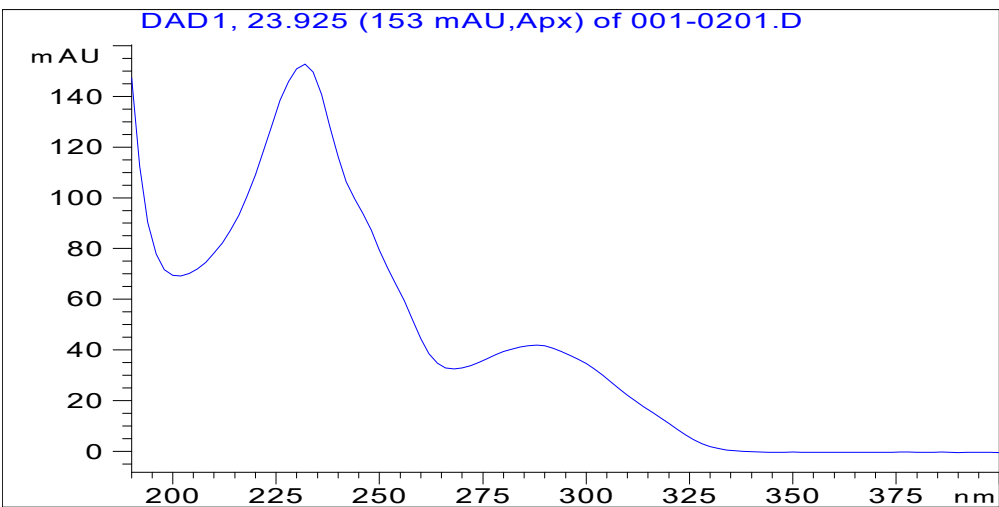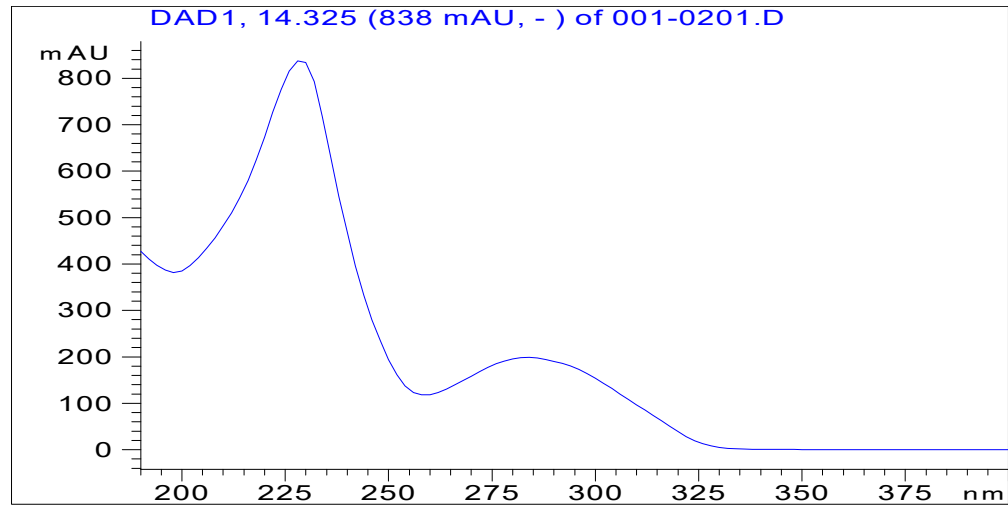

HPLC-DAD UV spectrum of **R9-1 5e**  
HPLC-ELSD chromatogram of **R7**

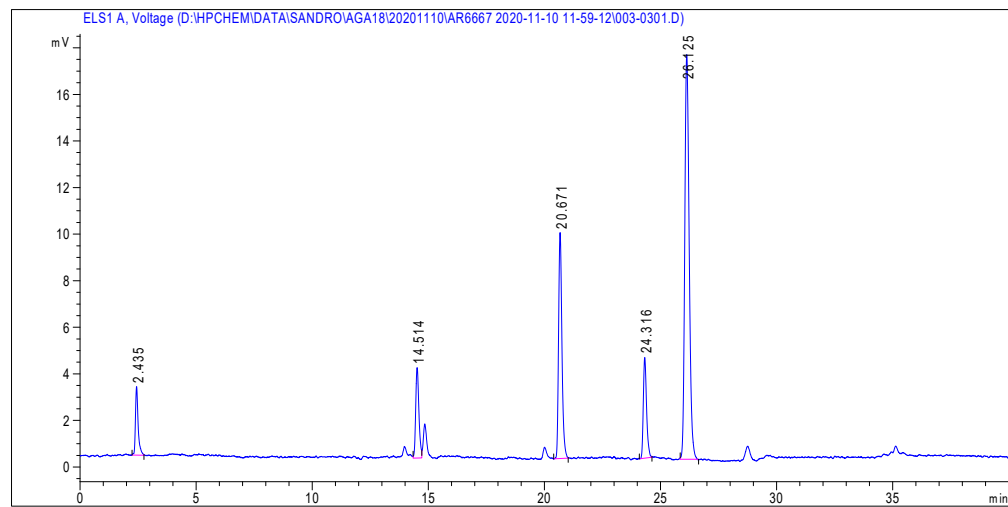

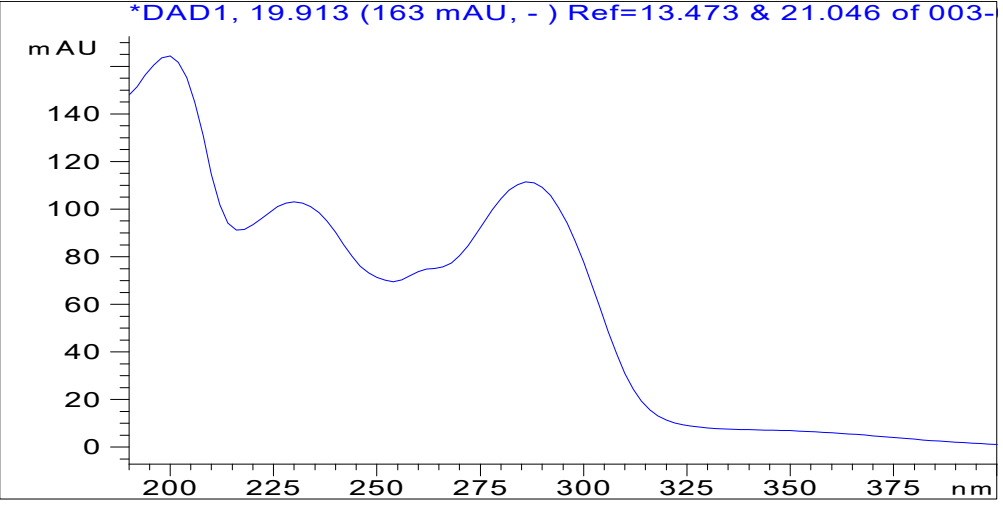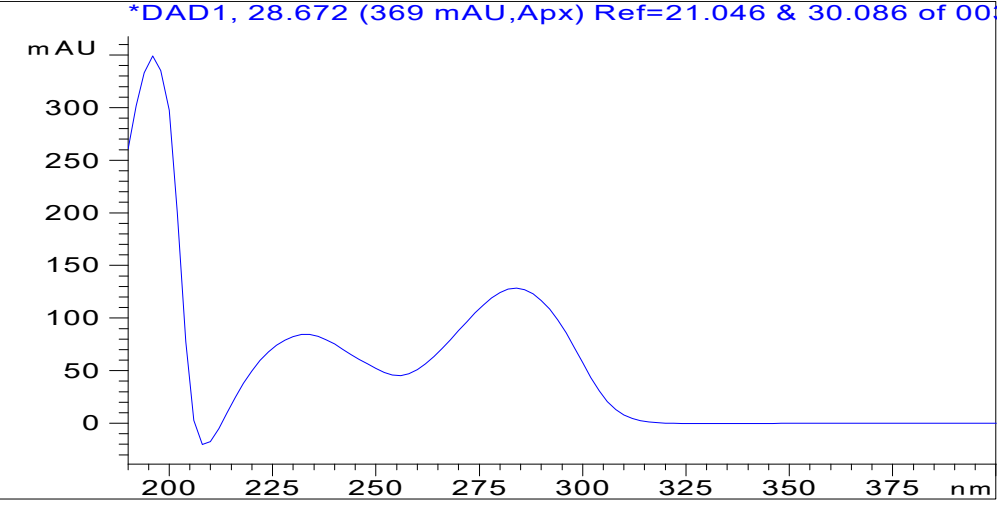

**FigureS6j.** HPLC-DAD UV spectrum of **R7 2'e**  
HPLC-DAD UV spectrum of **R7 1'e**

HPLC-DAD UV spectrum of **R7 2e**  
HPLC-DAD UV spectrum of **R7 1e**

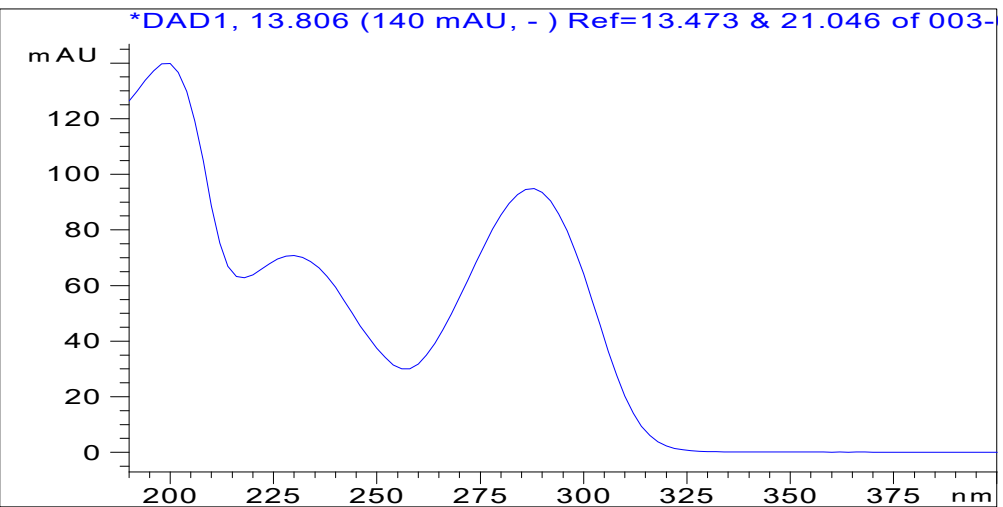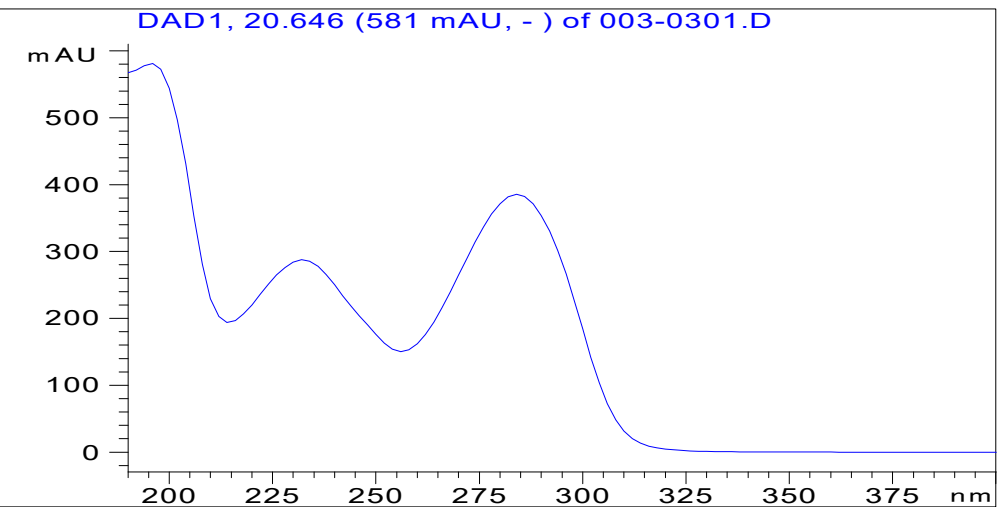



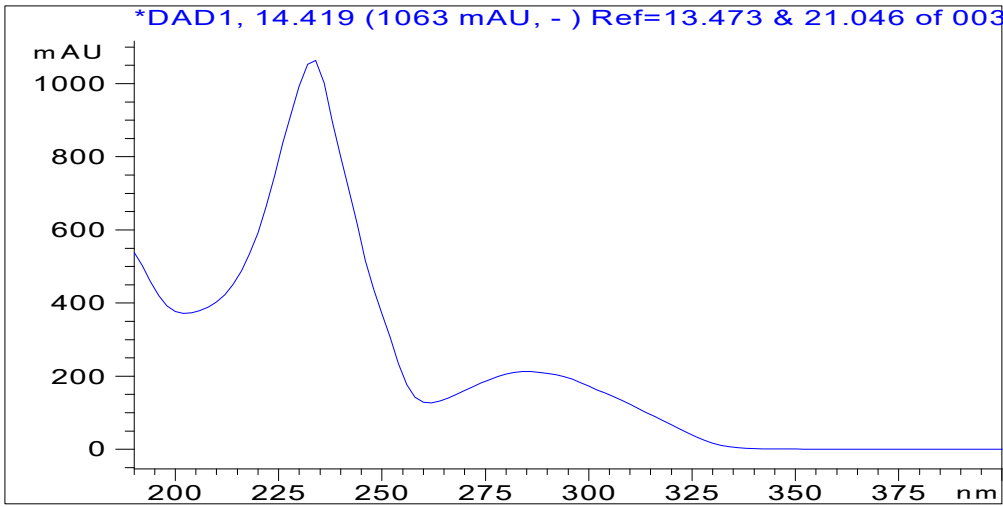

**Figure S6k.** HPLC-DAD UV spectrum of **R7 6e**  
HPLC-DAD UV spectrum of **R7 4e**

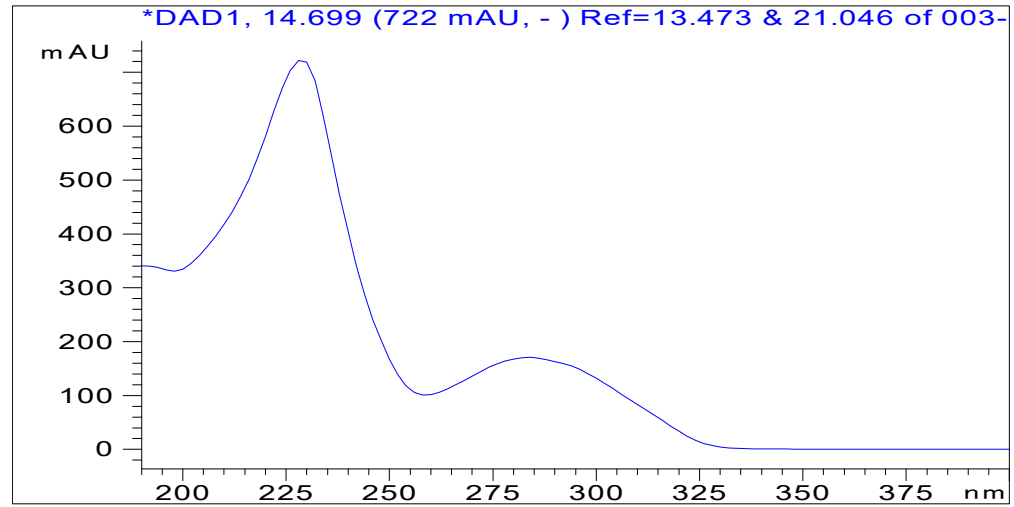

HPLC-DAD UV spectrum of **R7 5e**  
HPLC-DAD UV spectrum of **R7 3e**

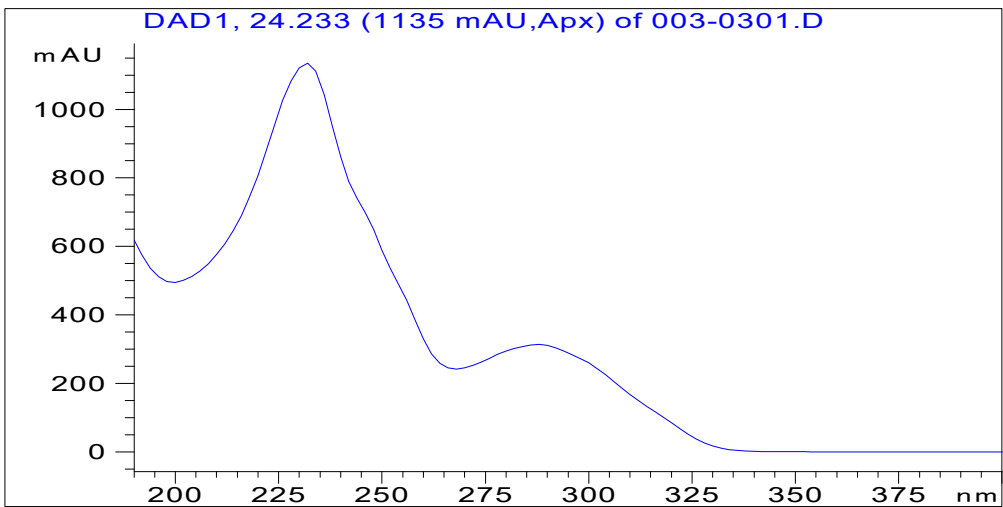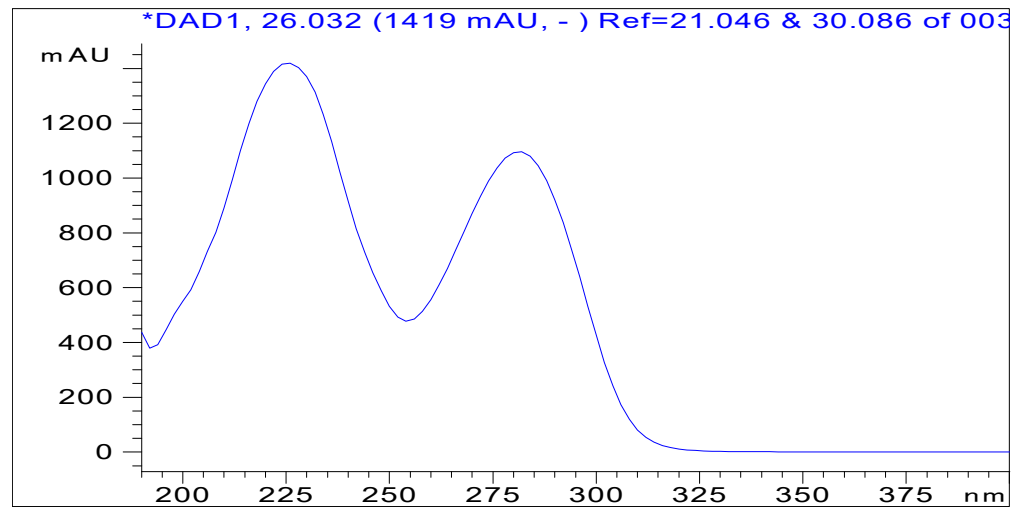

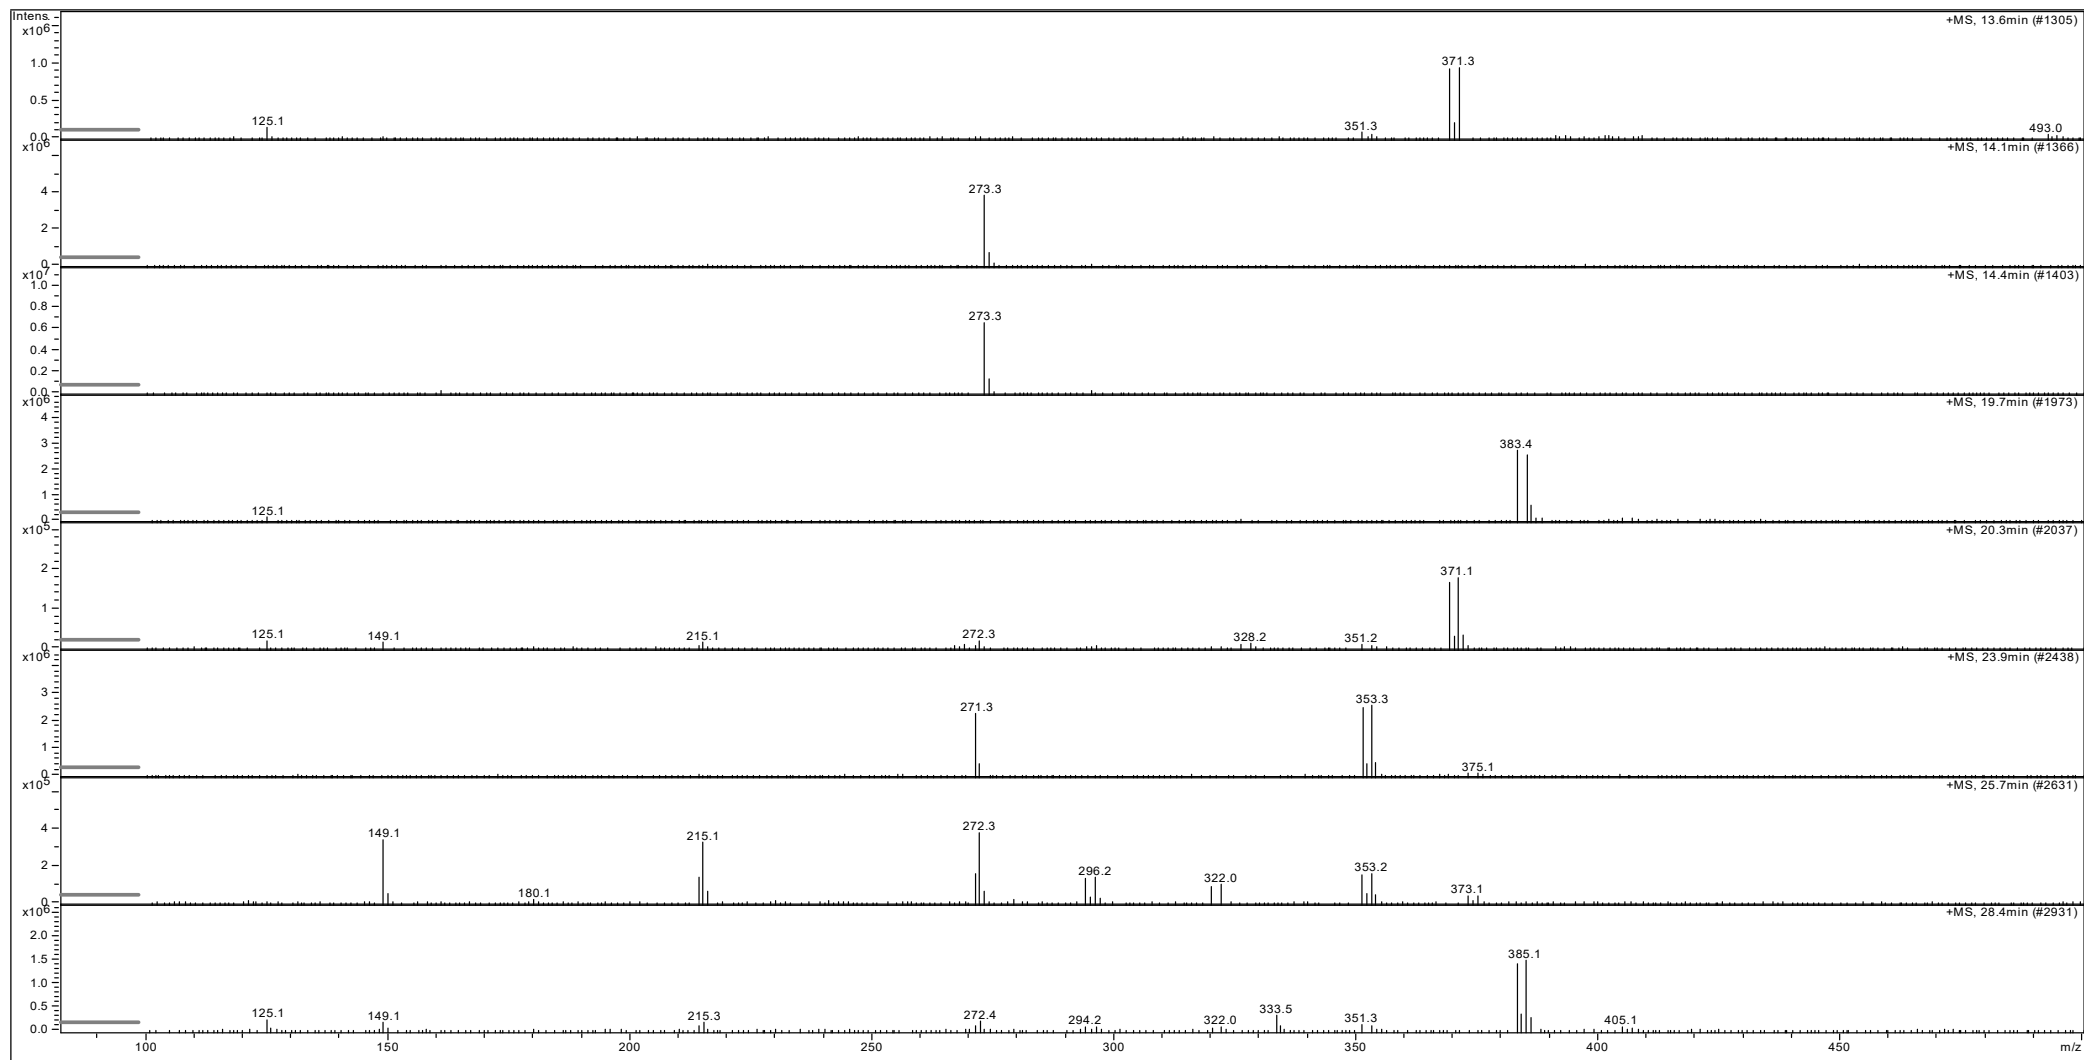

**Figure S6l.** molecular ions of **R7** at  $t_R$  : 13,6 (**1'e**), 14,1 (**6e**), 14,4 (**5e**), 19,7 (**2'e**), 20,3 (**1e**), 23,9 (**4e**), 25,7 (**3e**), 28,4 (**2e**)

**Figure S6m.        Comments to foregoing slides:**

– Agelastatin A and five methylated derivatives (**6e**, **1d**, **1m**, **1e**, **2m**, **2e**) were analyzed by HPLC-DAD. All substrates showed very similar UV spectra, having  $\lambda_{\text{max}} \sim 200, 230, 280$  and  $\epsilon_{200} > \epsilon_{280} > \epsilon_{230}$ . The product **6e** showed UV spectrum having  $\lambda_{\text{max}} \sim 230, 280$  and  $\epsilon_{230} > \epsilon_{280}$ . Subsequently, four reactions were carried out at different conditions as reported in Table 1.

– The chromatograms at  $\lambda = 289$  are shown for reactions R6, R7, R8. Four aliquots were taken from R9 every 15' before the reaction be quenched after 75'. Noteworthy, the peak at  $t_R = 23.9$  (**4e**) is abundant in R9-1 then slowly disappears, the relative intensity of peaks at  $t_R = 14.0$  (**6e**) and  $t_R = 14.3$  (**5e**) inverts, as well. The peak at  $t_R = 14.3$  (**5e**) is higher in R8 than in other chromatograms. All chromatographic peaks were compared with substrates of known  $t_R$  and the new peaks tentatively assigned to products on the base of their  $^1\text{H-NMR}$  spectra and relative abundance. The examinations of their UV spectra and MS data will give support to these initial assignments.

– In R6, the peak at  $t_R \sim 20$  (**2'e**) showed UV similar to the substrate **2e** ( $t_R \sim 29$ ). Peak at  $t_R \sim 24$  (**4e**) showed UV similar to product **6e** whereas the peak at  $t_R \sim 26$  (**3e**) showed a different UV spectrum, having  $\lambda_{\text{max}} \sim 200, 230, 280$  and  $\epsilon_{200} > \epsilon_{230} > \epsilon_{280}$ .

– All peaks in the sample R9-1 showed UV spectra similar to products (**4e**, **5e**, **6e**) which bear the same chromophore. The area of peaks in an ELSD chromatogram generally correspond better than UV chromatograms to the effective amount of each sample: R7 actually contains eight compounds.

– In R7, UV spectra of peaks at  $t_R = 13,6$  (**1'e**),  $t_R = 19,5$  (**2'e**),  $t_R = 20,3$  (**1e**),  $t_R = 28,4$  (**2e**) were similar to substrates; UV spectra of peaks at  $t_R = 14,1$  (**6e**),  $t_R = 14,4$  (**5e**),  $t_R = 23,9$  (**4e**) were similar to products. The peak at  $t_R = 25,7$  (**3e**) confirmed its unique UV bands.

– The (ESI+)-MS measurements on molecular ions confirm the preceding assignments. In particular, the elusive compound eluting at  $t_R = 23,9$  has  $[\text{M}+\text{H}]^+$  at  $m/z = 351-53$ , as expected for **4e**.

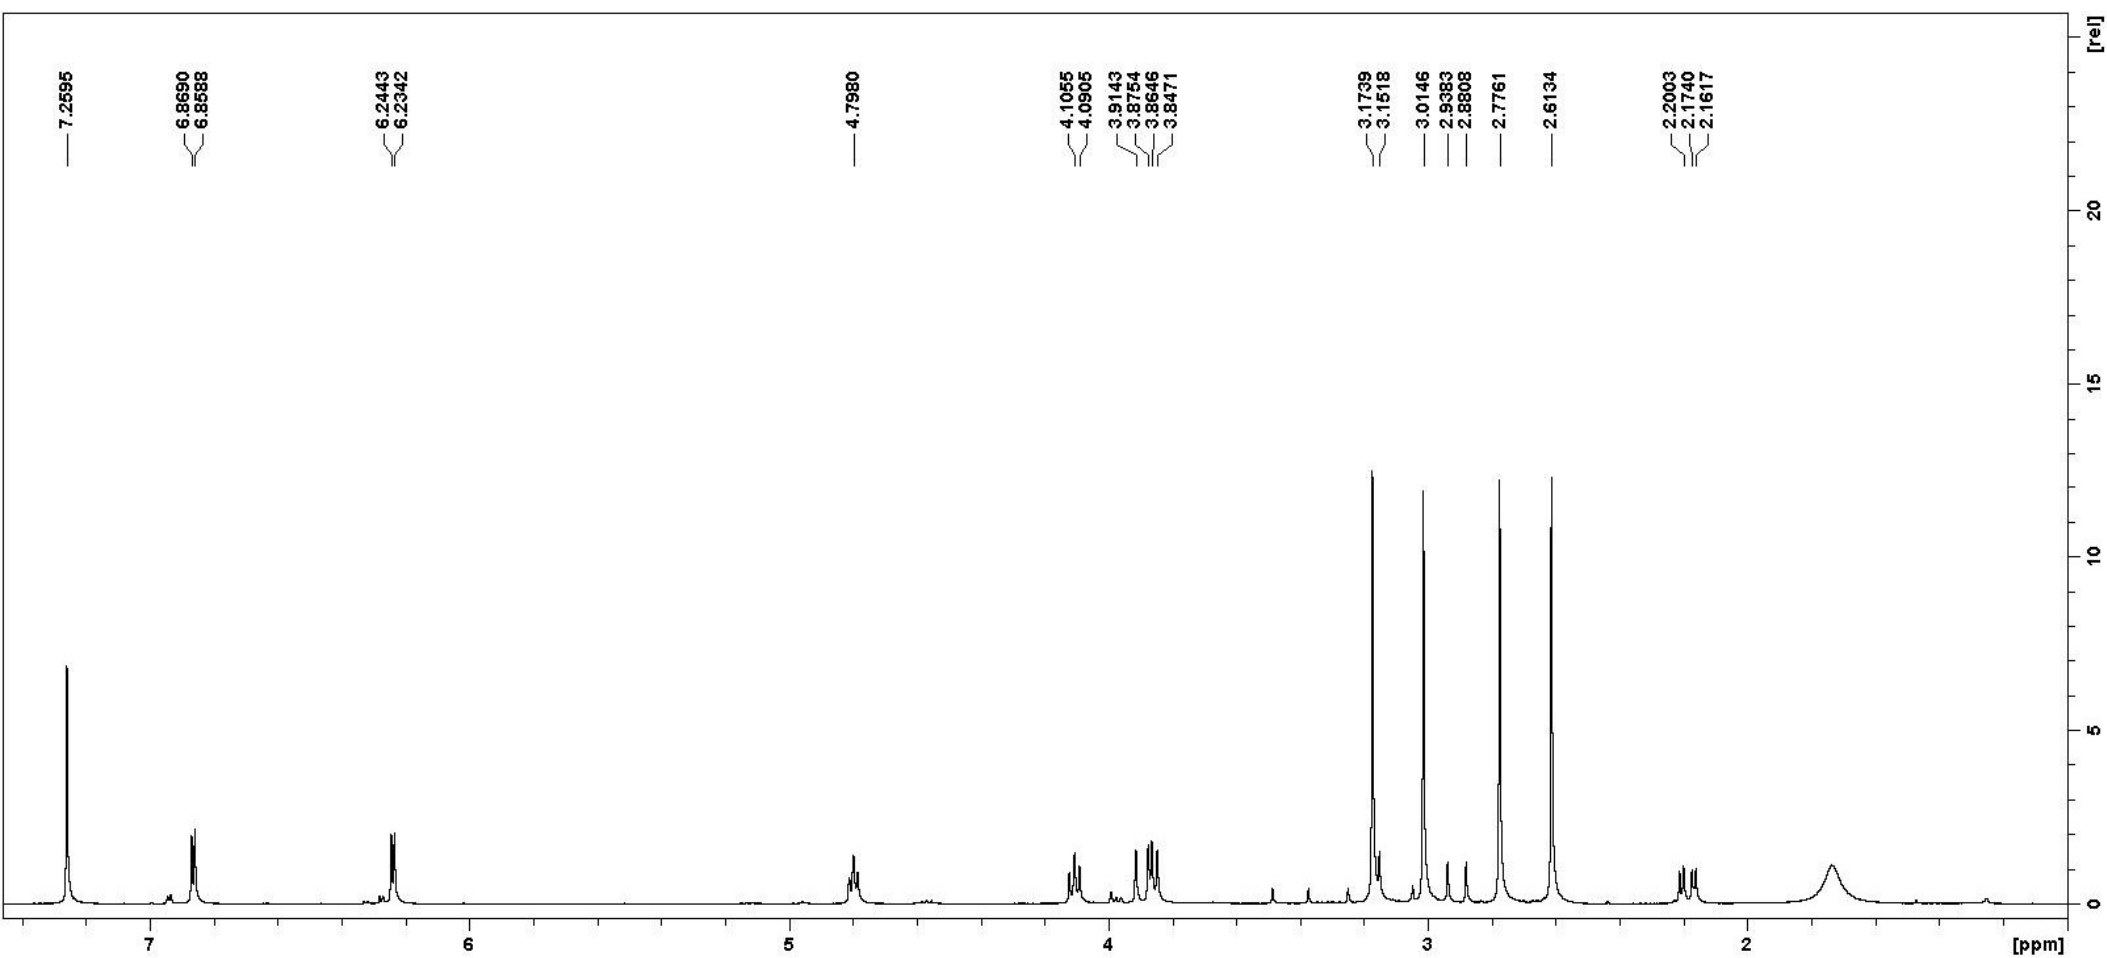

**Figure S7a.** – pure 2'e

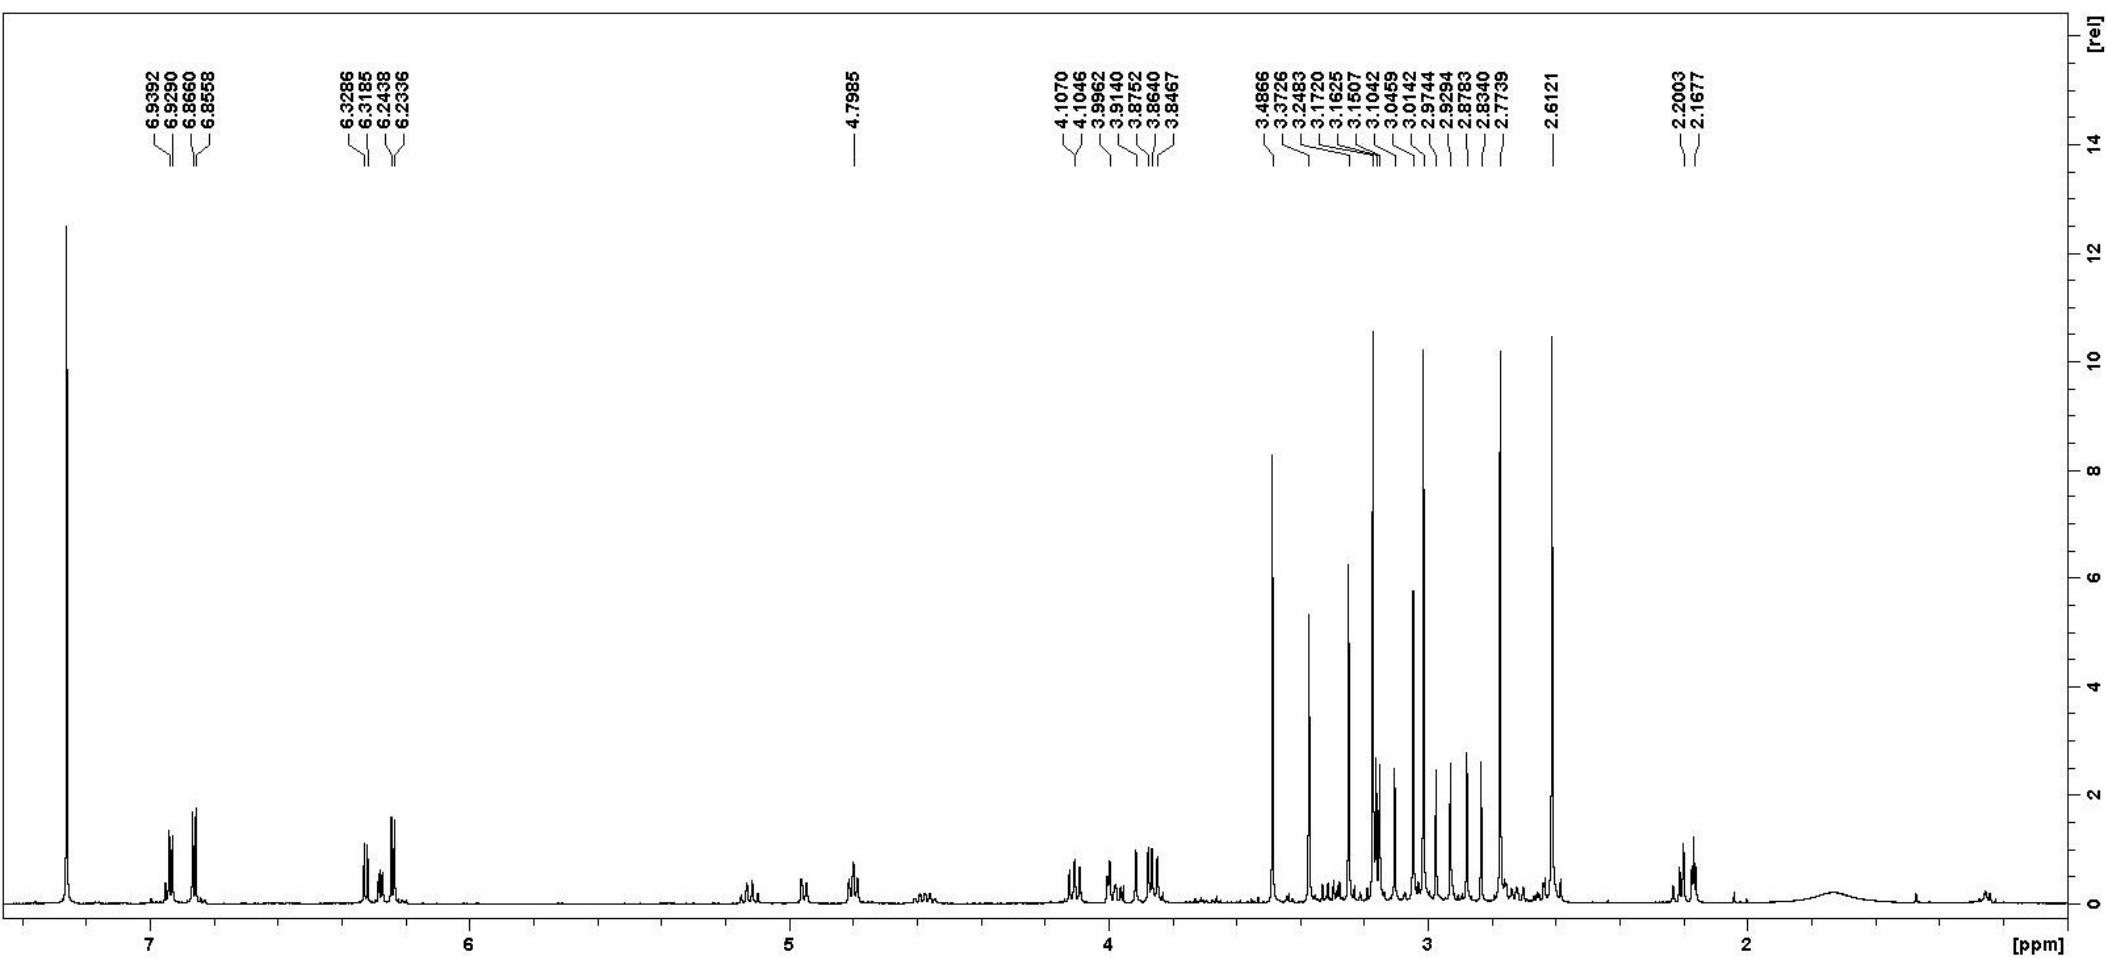

**Figure S7b.** – pure 2'e forms a mixture of 2'e/3e/(1e+2e)  $\sim$  1.5:1.5:(4)

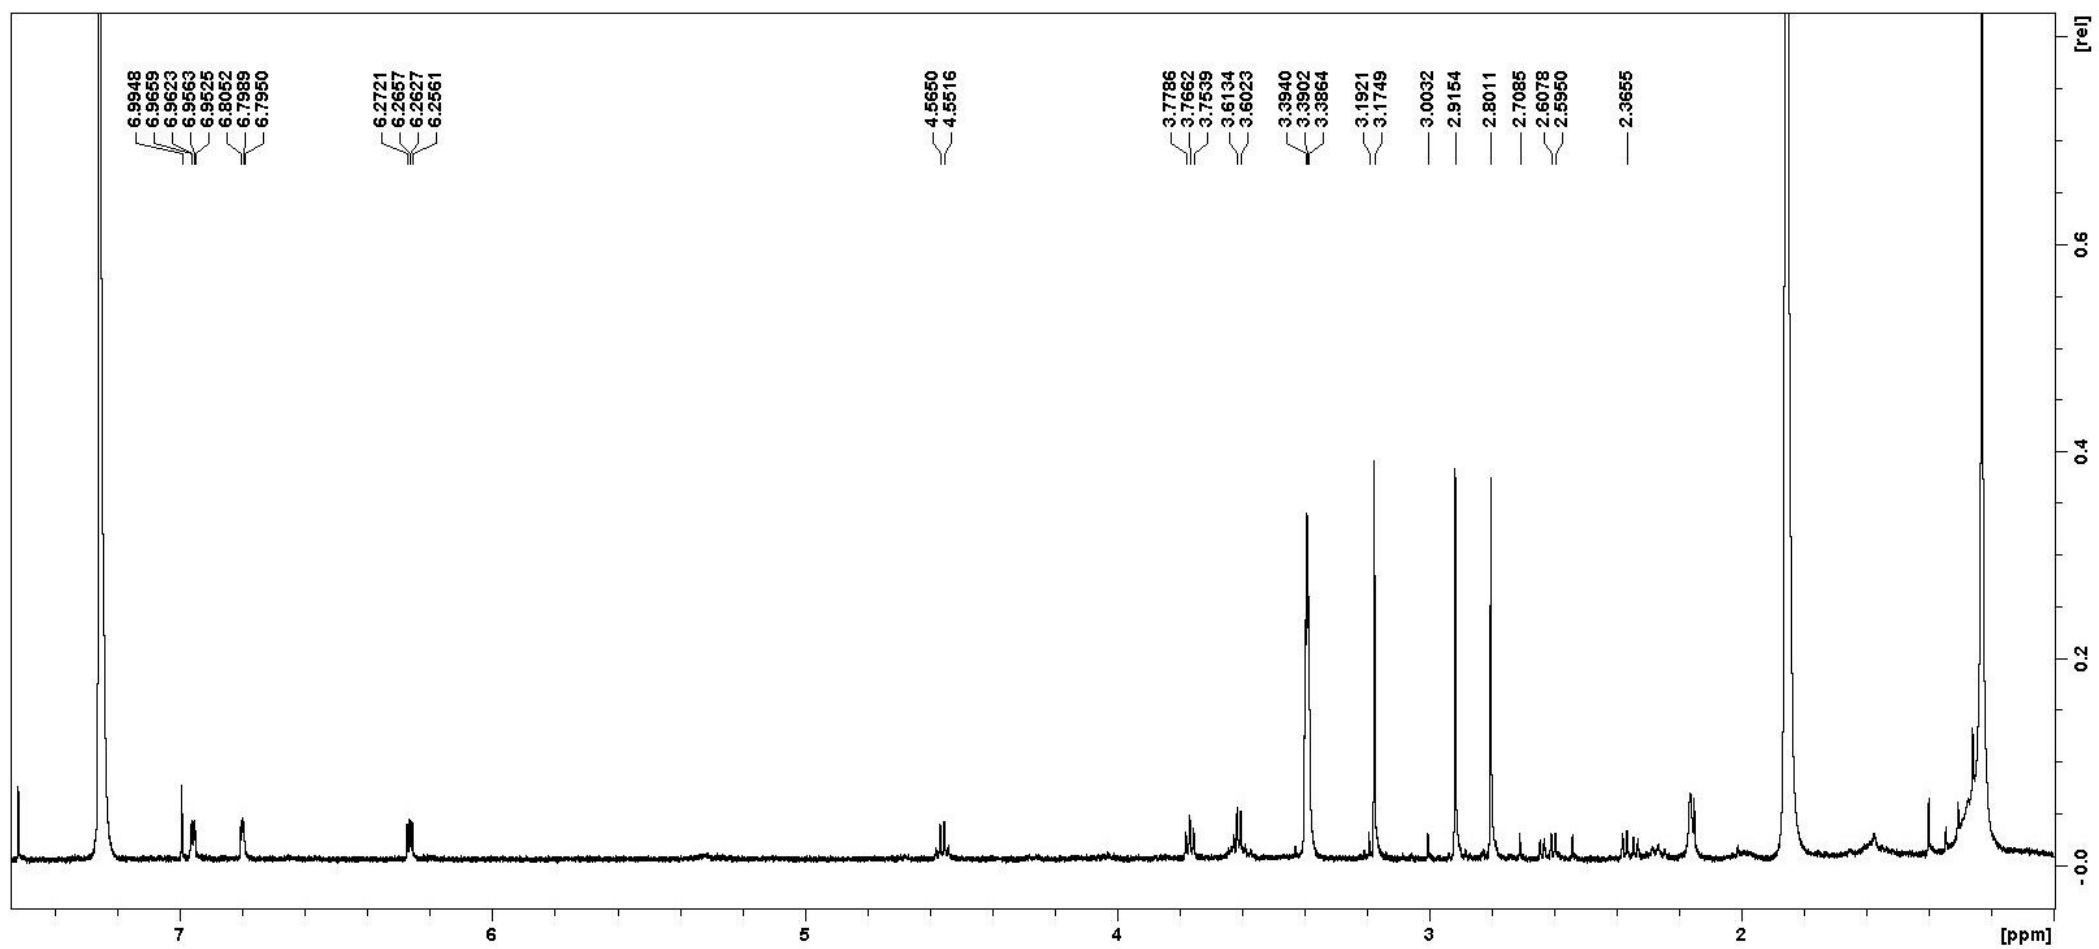

Figure S7c. – 8e pure

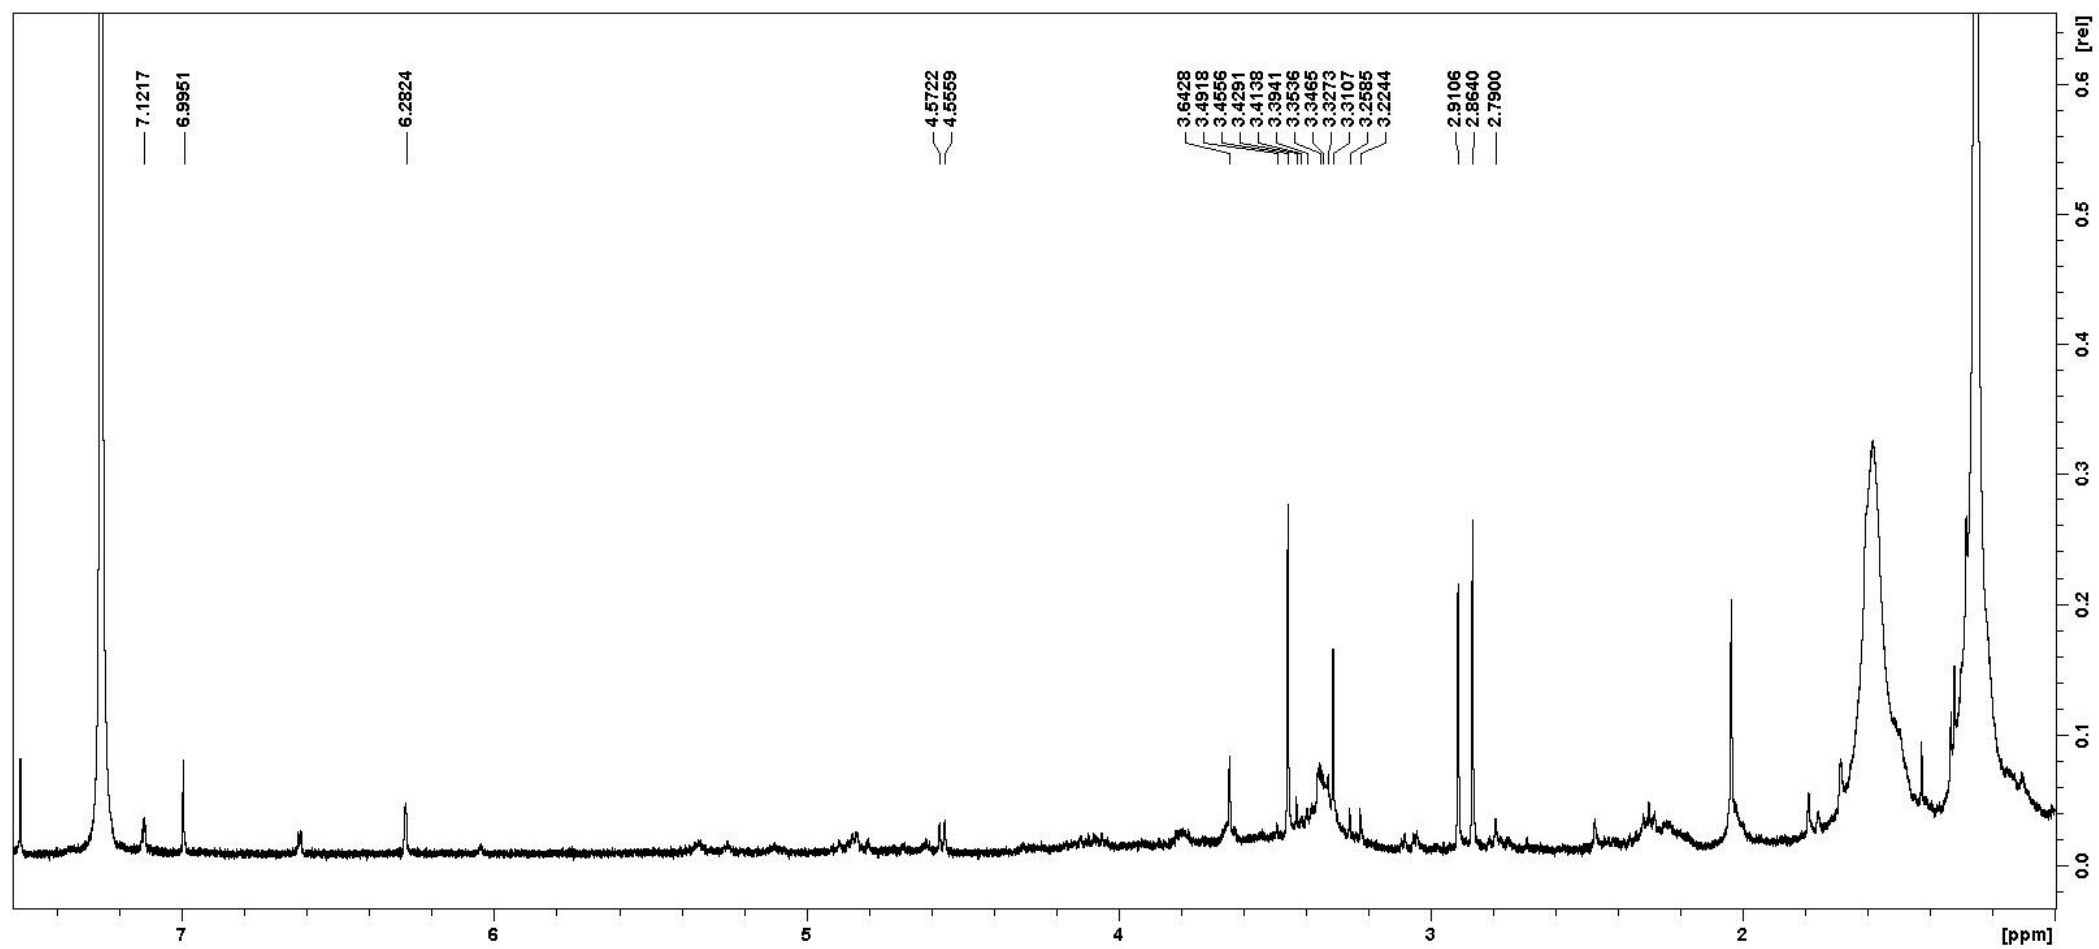

**Figure S7d.** – 8e + MeOH 70° (4h + 3h) then A21 => 6e

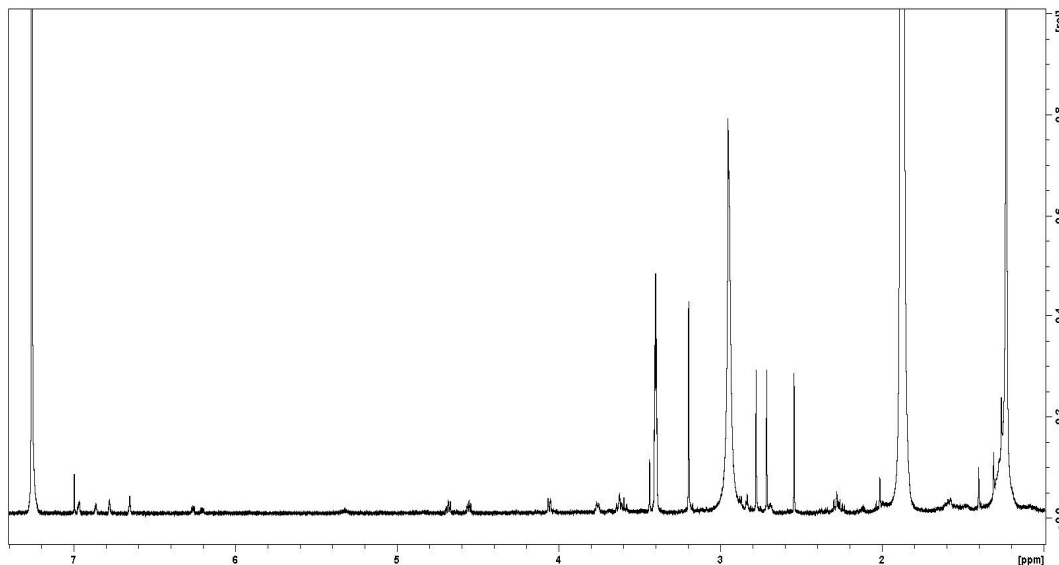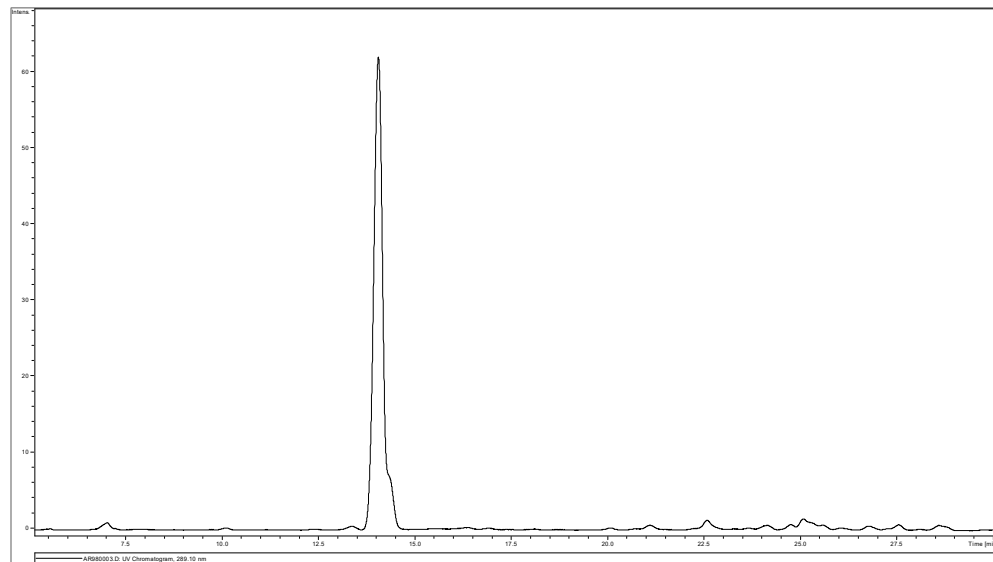

**Figure S7e.** – **8e** in  $\text{CDCl}_3$  /  $\text{CD}_3\text{OD}$  95:5 + MsOH

$70^\circ$  4h  $\Rightarrow$  **8e** / **6e**  $\sim$  50:50

LC chromatogram of raw products after 7h

MS of peak at  $t_R \sim 14'$  ( $m/z = 273$ )

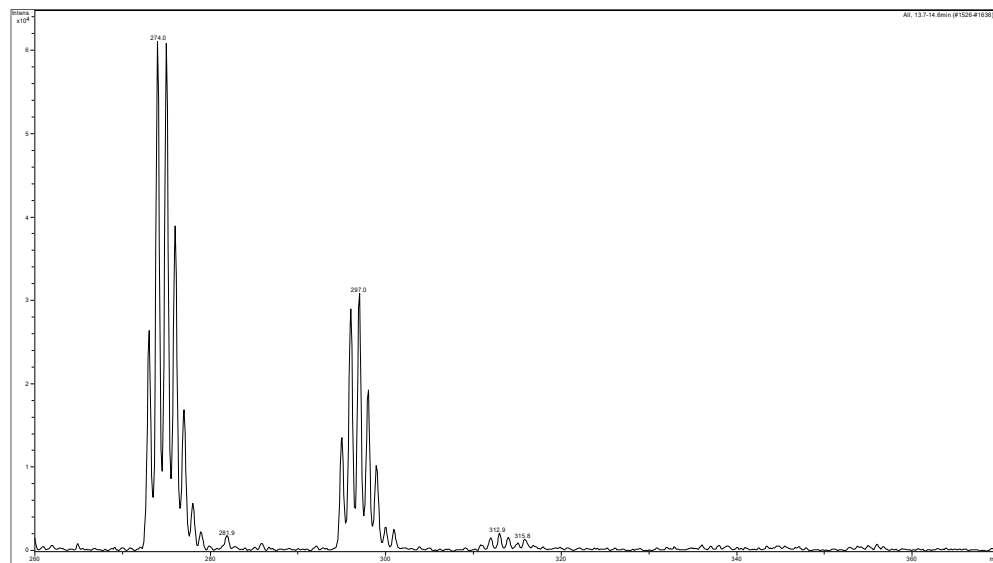



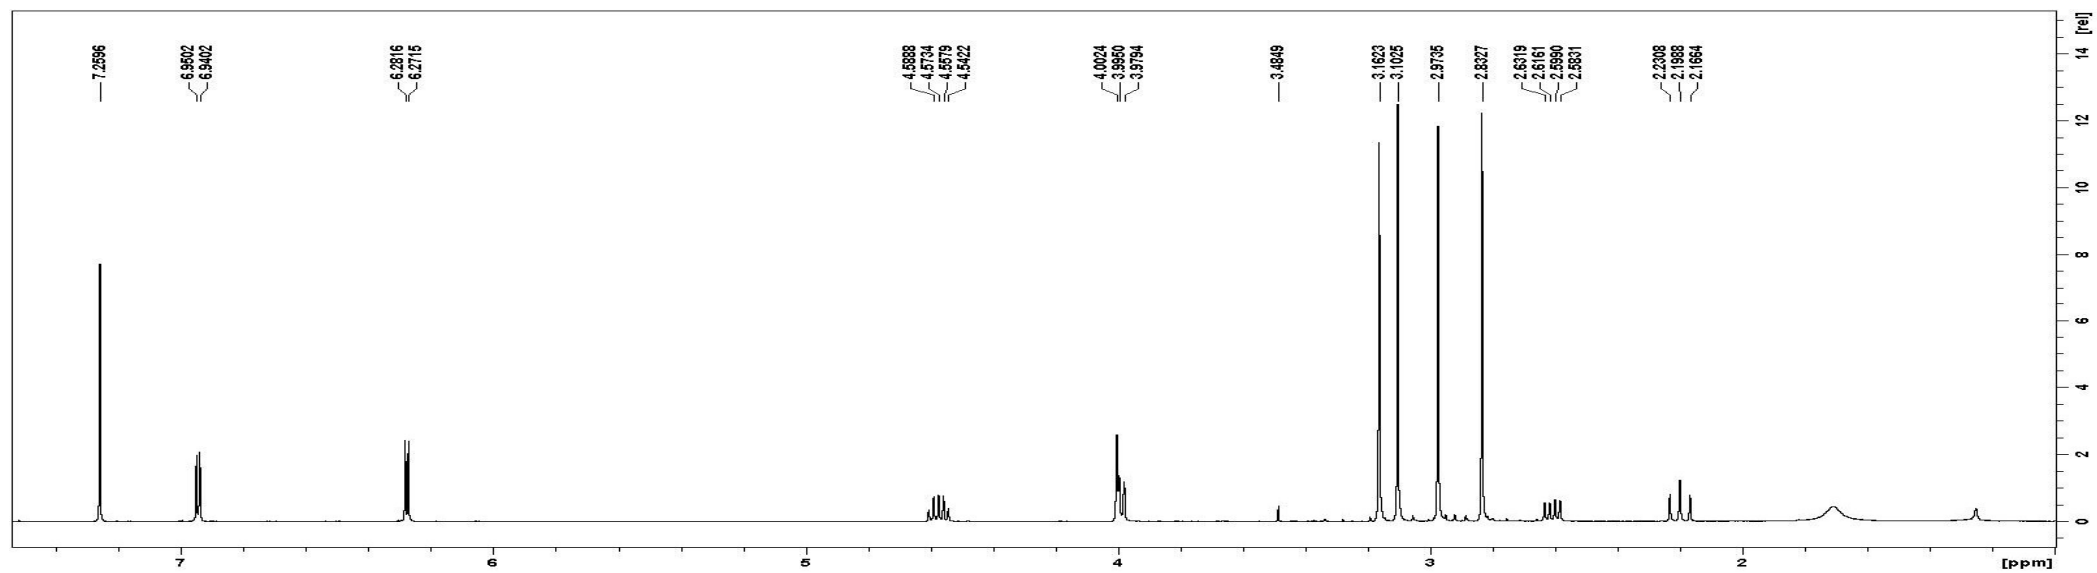

Figure S8a. - ↑ — **2e** for deuterium incorporation

↓ — **5e** for deuterium incorporation

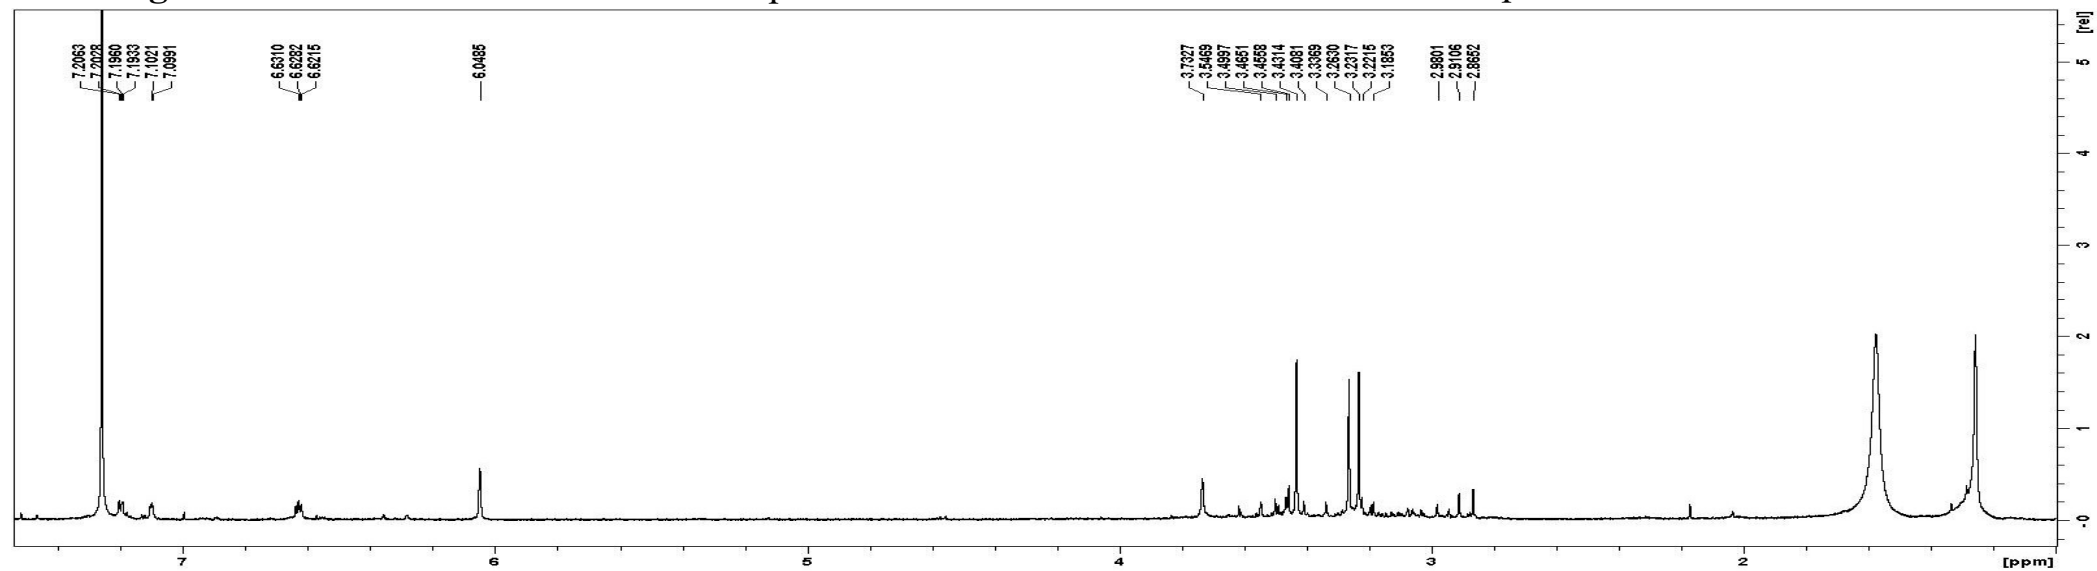

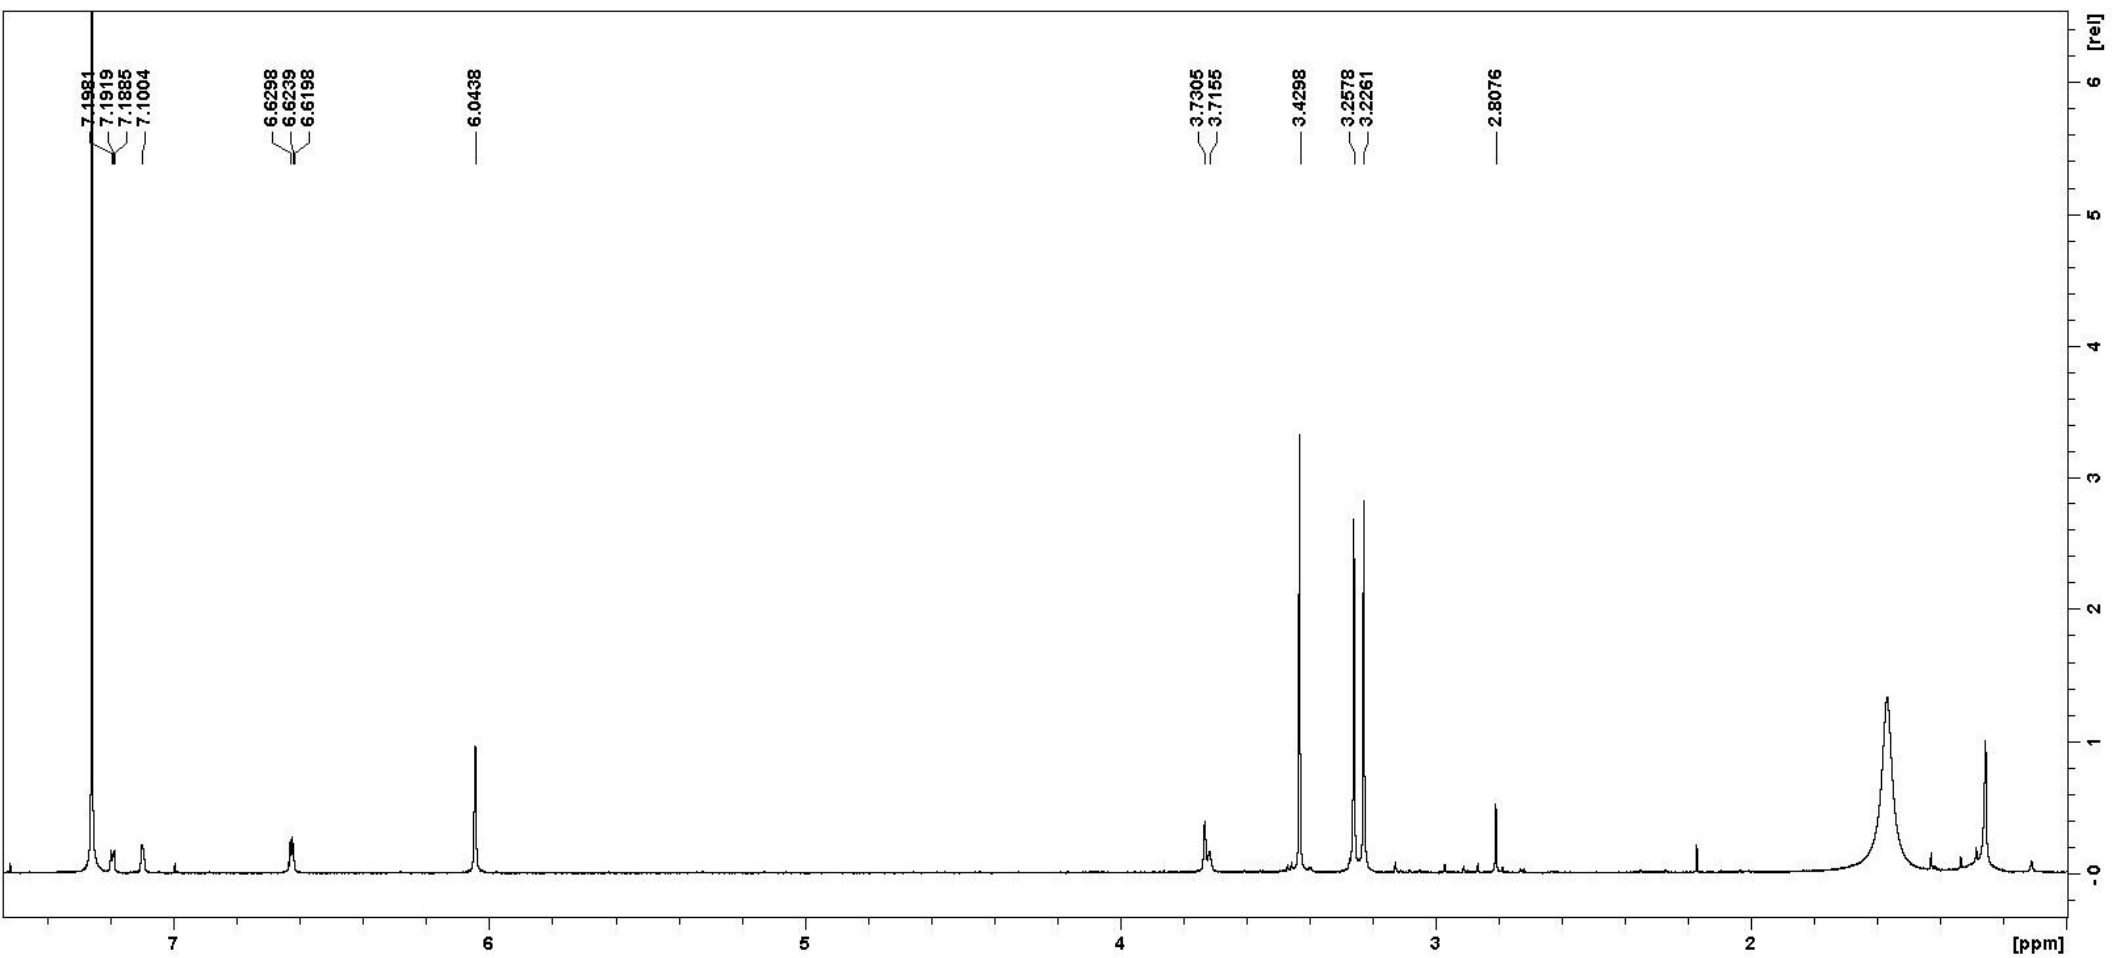

**Figure S8b. – 5e(2e)**

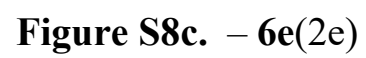

**Figure S8c. – 6e(2e)**

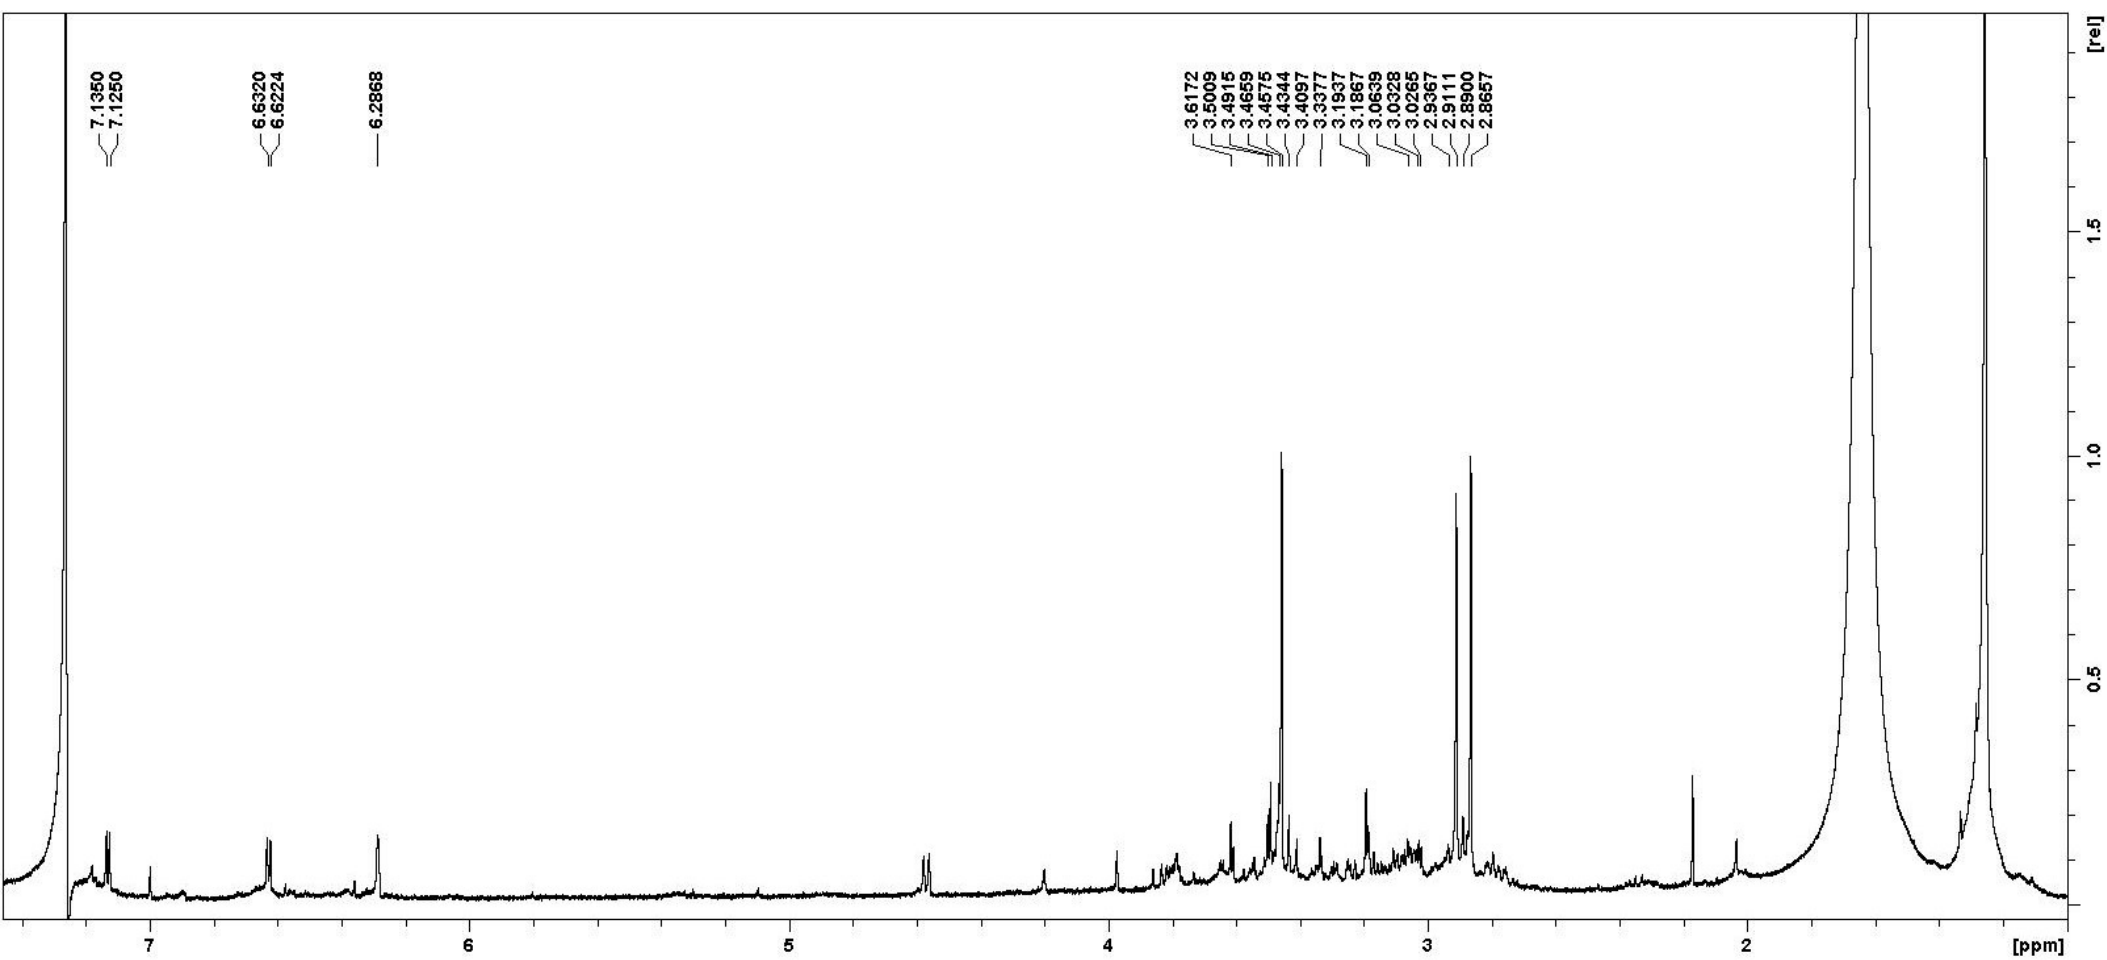

Figure S8d. – 6e(5e)

70B\_pos #1-50 RT: 0.00-0.27 AV: 50 NL: 1.79E7  
T: FTMS + p ESI cv=0.00 Full ms [105.0000-600.0000]

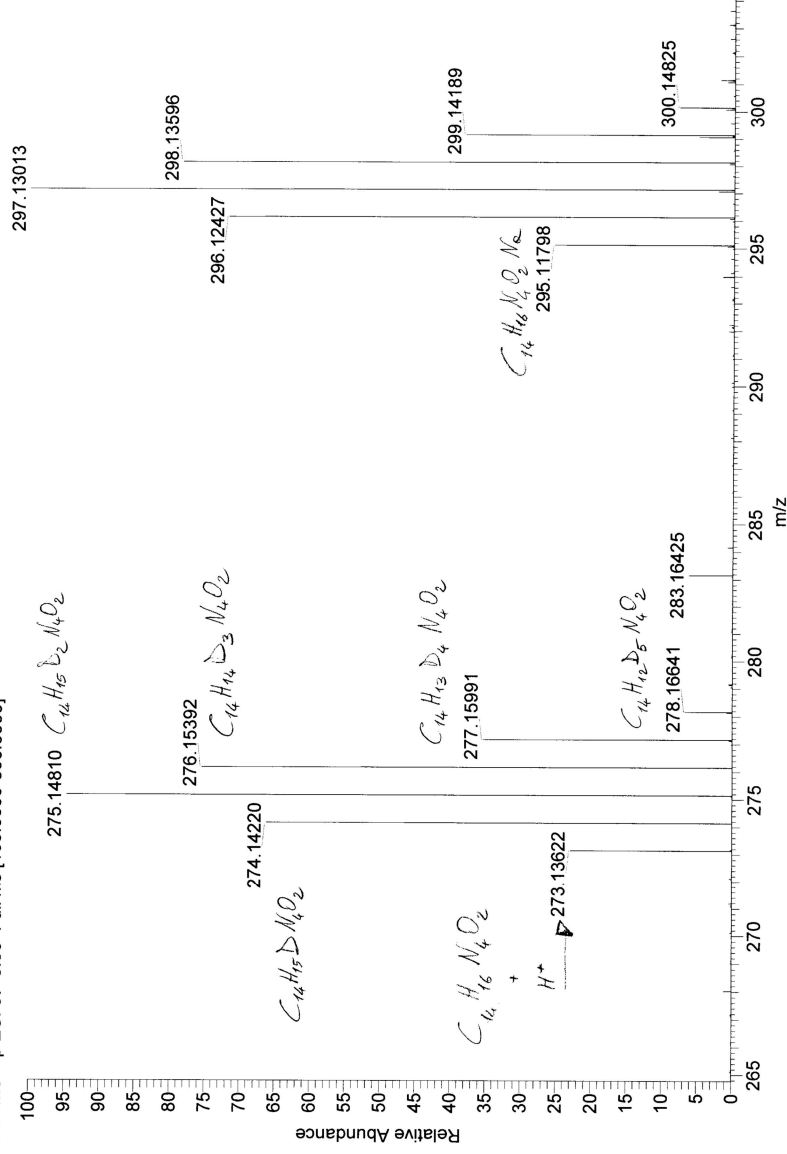

**Figure S8e.** HRMS of clusters for molecular ion of **6e(2e)**

70B\_pos.ms273 #1-64 RT: 0.00-0.40 AV: 64 NL: 6.55E5

T: FTMS + p ESI cv=0.00 Full ms2 273.1000@cid30.00 [71.0000-284.0000]  
185.07157

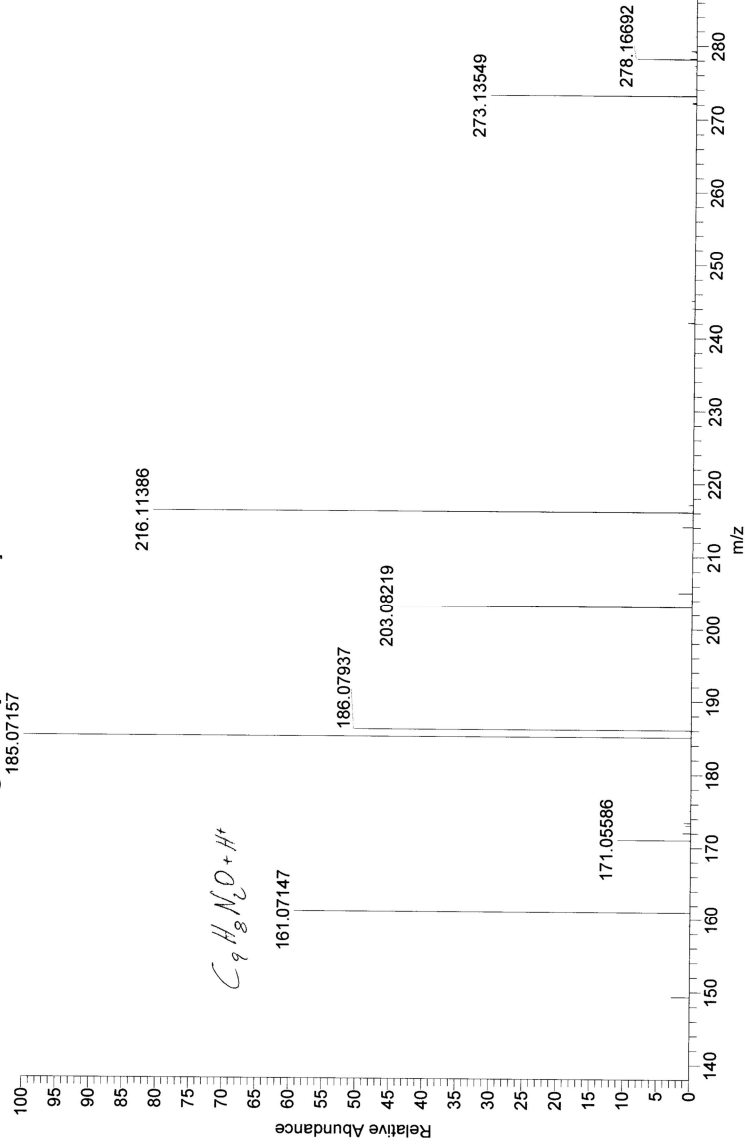

**Fig. S8f.** HRMS<sup>2</sup> of molecular ion at *m/z* 273 of **6e(2e)**

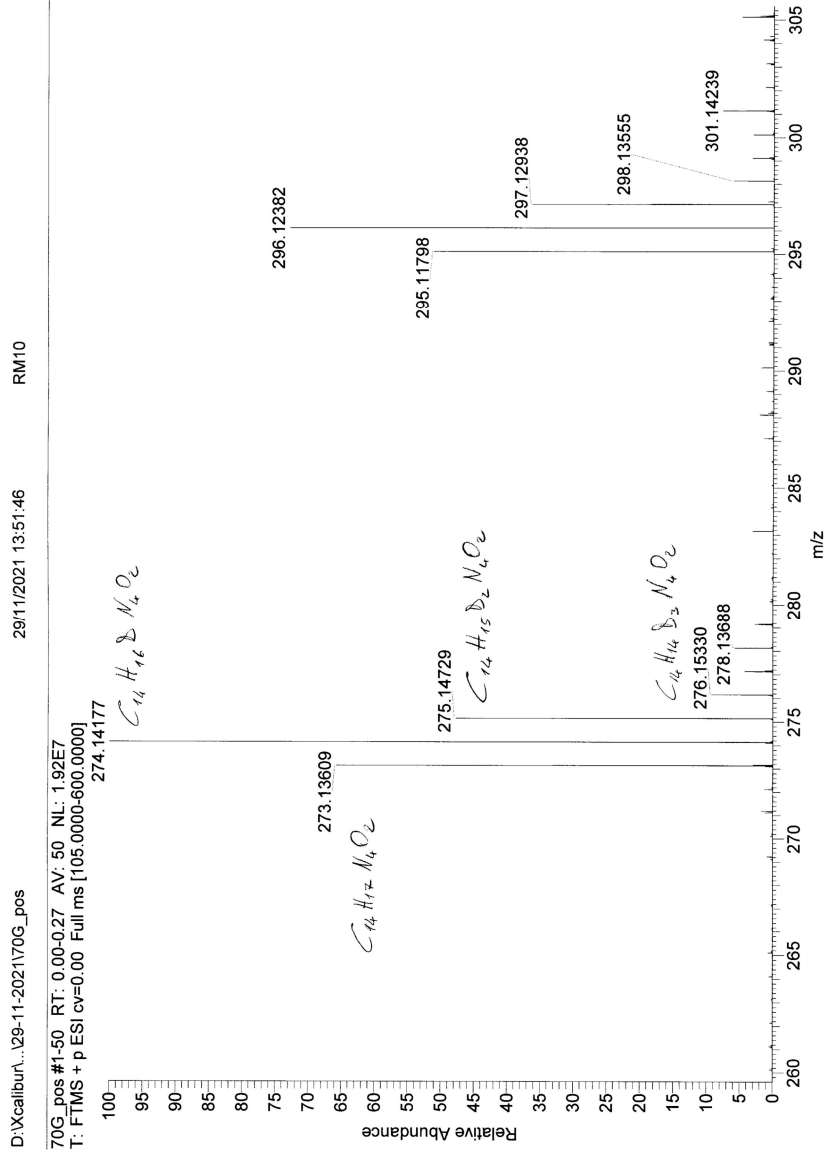

**Figure S8g.** HRMS of clusters for molecular ion of **5e(2e)**

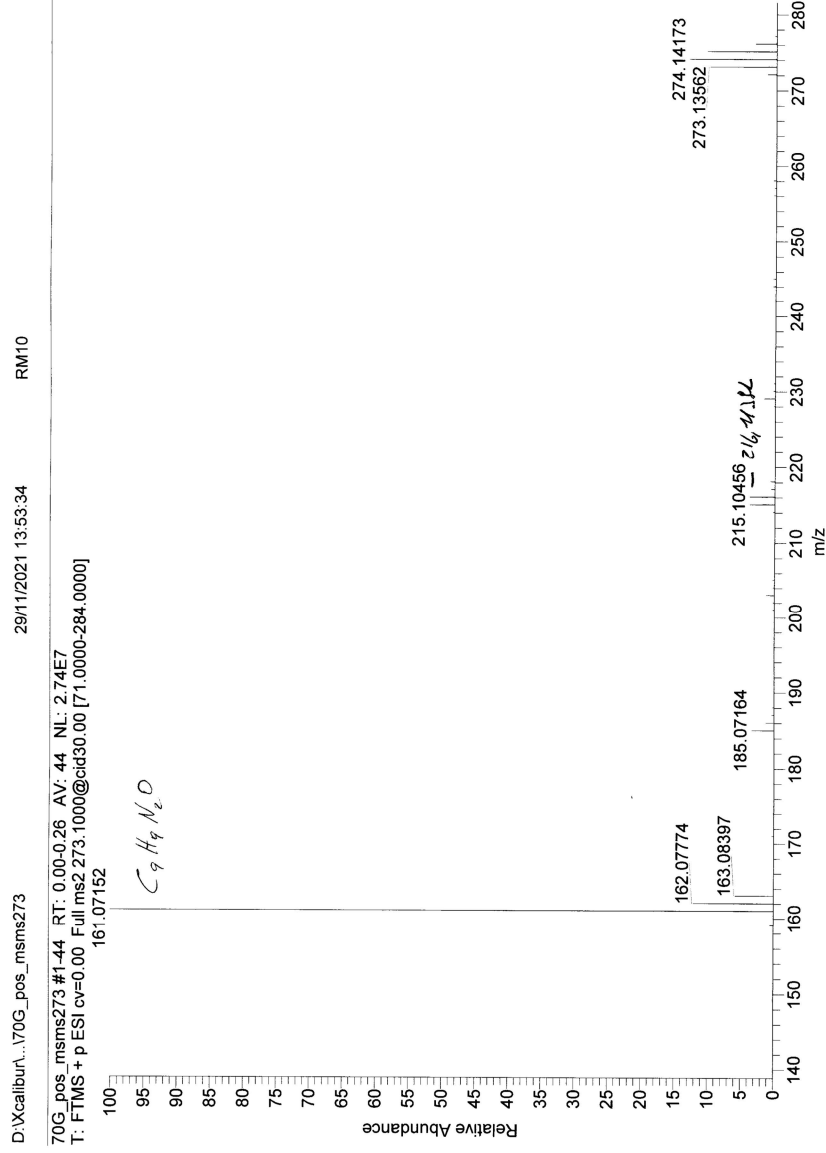

**Fig. S8h.** HR-MS<sup>2</sup> of molecular ion at  $m/z$  273 of **5e(2e)**

| A                                                     | B     | C                                                                            | D                        | E             | F       | G                        | H             | I   | J            | K   | L       |
|-------------------------------------------------------|-------|------------------------------------------------------------------------------|--------------------------|---------------|---------|--------------------------|---------------|-----|--------------|-----|---------|
| Compound                                              | Entry | Formula                                                                      | [M+H] <sup>+</sup> (m/z) | Rel. Int. (%) | D total | [ion] <sup>+</sup> (m/z) | Rel. Int. (%) | # D | Neutral loss | # D | H/D (%) |
| 6e(2e)<br><br>Neutral<br>loss %<br>H=51.7%<br>D=48.3% | 1     | C <sub>14</sub> H <sub>16</sub> N <sub>4</sub> O <sub>2</sub>                | 273                      | 9.3           | 0       | 161                      | 100           | 0   | 112          | 0   | 9.3     |
|                                                       | 2     | C <sub>14</sub> H <sub>15</sub> DN <sub>4</sub> O <sub>2</sub>               | 274                      | 22.4          | 1       | 162                      | 78.1          | 1   | 112          | 0   | 17.5    |
|                                                       | 3     |                                                                              |                          |               | 1       | 161                      | 21.9          | 0   | 113          | 1   | 4.9     |
|                                                       | 4     | C <sub>14</sub> H <sub>14</sub> D <sub>2</sub> N <sub>4</sub> O <sub>2</sub> | 275                      | 33.6          | 2       | 163                      | 55.2          | 2   | 112          | 0   | 18.5    |
|                                                       | 5     |                                                                              |                          |               | 2       | 162                      | 44.8          | 1   | 113          | 1   | 15.1    |
|                                                       | 6     | C <sub>14</sub> H <sub>14</sub> D <sub>3</sub> N <sub>4</sub> O <sub>2</sub> | 276                      | 20.8          | 3       | 164                      | 26.7          | 3   | 112          | 0   | 5.5     |
|                                                       | 7     |                                                                              |                          |               | 3       | 163                      | 60.0          | 2   | 113          | 1   | 12.5    |
|                                                       | 8     |                                                                              |                          |               | 3       | 162                      | 13.3          | 1   | 114          | 2   | 2.8     |
|                                                       | 9     | C <sub>14</sub> H <sub>14</sub> D <sub>4</sub> N <sub>4</sub> O <sub>2</sub> | 277                      | 13.9          | 4       | 165                      | 6.9           | 4   | 112          | 0   | 0.9     |
|                                                       | 10    |                                                                              |                          |               | 4       | 164                      | 58.6          | 3   | 113          | 1   | 8.1     |
|                                                       | 11    |                                                                              |                          |               | 4       | 163                      | 34.5          | 2   | 114          | 2   | 4.8     |
|                                                       |       |                                                                              |                          |               |         |                          |               |     |              |     |         |
| 5e(2e)<br><br>Neutral<br>loss %<br>H=84.6%<br>D=15.4% | 12    | C <sub>14</sub> H <sub>16</sub> N <sub>4</sub> O <sub>2</sub>                | 273                      | 24,8          | 0       | 161                      | 100           | 0   | 112          | 0   | 24,8    |
|                                                       | 13    | C <sub>14</sub> H <sub>15</sub> DN <sub>4</sub> O <sub>2</sub>               | 274                      | 45,6          | 1       | 162                      | 88,6          | 1   | 112          | 0   | 40,4    |
|                                                       | 14    |                                                                              |                          |               | 1       | 161                      | 11,4          | 0   | 113          | 1   | 5,2     |
|                                                       | 15    | C <sub>14</sub> H <sub>14</sub> D <sub>2</sub> N <sub>4</sub> O <sub>2</sub> | 275                      | 23,5          | 2       | 163                      | 70,5          | 2   | 112          | 0   | 16,5    |
|                                                       | 16    |                                                                              |                          |               | 2       | 162                      | 29,5          | 1   | 113          | 1   | 6,9     |
|                                                       | 17    | C <sub>14</sub> H <sub>14</sub> D <sub>3</sub> N <sub>4</sub> O <sub>2</sub> | 276                      | 6,2           | 3       | 164                      | 47,7          | 3   | 112          | 0   | 3,0     |
|                                                       | 18    |                                                                              |                          |               | 3       | 163                      | 43,1          | 2   | 113          | 1   | 2,7     |
|                                                       | 19    |                                                                              |                          |               | 3       | 162                      | 9,2           | 1   | 114          | 2   | 0,6     |
|                                                       |       |                                                                              |                          |               |         |                          |               |     |              |     |         |
| 6e(5e)<br><br>Neutral<br>loss %<br>H=78.5%<br>D=21.5% | 20    | C <sub>14</sub> H <sub>16</sub> N <sub>4</sub> O <sub>2</sub>                | 273                      | 47.0          | 0       | 161                      | 100           | 0   | 112          | 0   | 47.0    |
|                                                       | 21    | C <sub>14</sub> H <sub>15</sub> DN <sub>4</sub> O <sub>2</sub>               | 274                      | 35.6          | 1       | 162                      | 71.0          | 1   | 112          | 0   | 25.3    |
|                                                       | 22    |                                                                              |                          |               | 1       | 161                      | 29.0          | 0   | 113          | 1   | 10.3    |
|                                                       | 23    | C <sub>14</sub> H <sub>14</sub> D <sub>2</sub> N <sub>4</sub> O <sub>2</sub> | 275                      | 17.4          | 2       | 163                      | 35.7          | 2   | 112          | 0   | 6.2     |
|                                                       | 24    |                                                                              |                          |               | 2       | 162                      | 53.6          | 1   | 113          | 1   | 9.3     |
|                                                       | 25    |                                                                              |                          |               | 2       | 161                      | 10.7          | 0   | 114          | 2   | 1.9     |

**Figure S8i.**

Table 2

**Figure S8j.** The cluster of **6e**(2e) was formed by five ions having from zero ( $m/z$  273, entry 1) and up to four ( $m/z$  274-77, entries 2-11) atoms of deuterium. The respective empirical formulae are reported in col. C, the  $m/z$  values in column D, their relative intensity in col. E and the total number of deuterium atoms in col. F. The experiment of MS<sup>2</sup> on the ion [M+H]<sup>+</sup> at  $m/z$  273 yielded five positive fragments at  $m/z$  216, 203, 185, 171, 161 and the full fragmentation pattern is more clearly illustrated in Figure 1.

The fragment ion at  $m/z$  161 stands out as a diagnostic ion in that it corresponds to the pyrazinone moiety after loss of the neutral imidazolone moiety. The pyrazinone moiety can contain from zero ( $m/z$  161, entry 1) and up to four ( $m/z$  162-65, entries 2-11) deuterium atoms. The respective ions are reported in column G, their relative intensity in col. H and the total number of deuterium atoms in col. I. Likely, the deuteration occurs easily at C14 and C15 by a SEA reaction, which can take place at any stage of the transformation from **2e** to **6e**, included. An acid catalysed interconversion between **2e** and an alleged olefin **9e**, involved in the equilibrium carbocation **A**  $\rightleftharpoons$  **9e**, would explain the presence of four deuterium in the pyrazinone moiety (col. I, entry 9). The compound **9e** has not been isolated in the present study but an agelastatin derivative with C5=C6 double bond has been previously reported.

The difference between the  $m/z$  of each molecular ion (col. D) and the corresponding pyrazinone ion (col. G) constitutes the mass value of each neutral loss, which account for the imidazolone moiety. The respective mass values are reported in column J, their total number of deuterium atoms in col. K and the H/D relative abundance in col. L. The deuterium can be linked at either C4 and/or C5 of the imidazolone ring. The deuteration at C4 occurs because of the equilibrium carbocation **A**  $\rightleftharpoons$  **3e** whereas the deuteration at C5 is the starting point/step from **5e** to **6e**.

The mass spectrometry data for compounds **5e**(2e) and **6e**(5e) were processed by applying the same calculations used for **6e**(2e). The cluster of **5e**(2e) showed four ions having from zero ( $m/z$  273, entry 12) and up to three ( $m/z$  274-76, entries 13-19) atoms of deuterium.



### Figure S8j.

The fragmentation pattern of **5e** at  $m/z$  273 consisted only of a very weak fragment at  $m/z$  216 and an intense one at  $m/z$  161. The pyrazinone moiety could accommodate up to three deuterium at the pyrrole ring ( $m/z$  164).

The loss of 114 Dalton (col. J, entry 19) implies the presence of two deuterium at the imidazolone portion. The deuterium at C4 comes from the equilibrium  $A \rightleftharpoons 3$  but the simultaneous presence of deuterium at C5 force to write  $5 \rightleftharpoons C$  as equilibrium instead of  $5 \rightarrow C$ .

The cluster of **6e(5e)** showed just three peaks at  $m/z$  273, 274, 275 (entries 20-25) because the deuteration at C6 is no longer possible. The loss of 114 Dalton (col. J, entry 25) is also still observed by fragmentation of the ion  $[M+H]^+$  at  $m/z$  275. The reaction steps  $5 \rightleftharpoons C \rightleftharpoons D \rightarrow 6$  explain the deuterium at C5 but the simultaneous presence of deuterium at C4 force the introduction of an equilibrium  $5 \rightleftharpoons E$ . Obviously, it is not possible to establish the position of deuteration in the neutral loss of 113 Dalton mass value. What matters is that the total percentage of deuterated imidazolone losses (col. A) amounts to about 48% in **6e(2e)**, 15% in **5e(2e)** and 21% in **6e(5e)**. The percentage difference  $\mathbf{6e(2e)} - \mathbf{5e(2e)} = 33\%$  can be ascribed to the deuteration at C5 for the final steps of conversion  $\mathbf{5e} \rightarrow \mathbf{6e}$ . The value 33% is double of 15% value deriving from the equilibria  $A \rightleftharpoons 3$ ,  $5 \rightleftharpoons C$ ,  $5 \rightleftharpoons E$  and therefore can be considered a valid effective support of the mechanism illustrated in the Scheme. The percentage of 21% deuteration on the imidazolone of **6e(5e)** comes from an experiment performed under conditions other than **6e(2e)** and does not differ much from 33%. In my opinion, this deuteration comes in minimal part from the equilibria  $5 \rightleftharpoons C$ ,  $5 \rightleftharpoons E$  (missing  $A \rightleftharpoons 3$ ) but mostly from the steps  $5e \rightleftharpoons C \rightleftharpoons D \rightarrow 6e$ . The medium-low incorporation of deuterium might arise from poor drying of reaction flasks.

Fig. S8k. 84 Molecular ions of **6e(5e)**

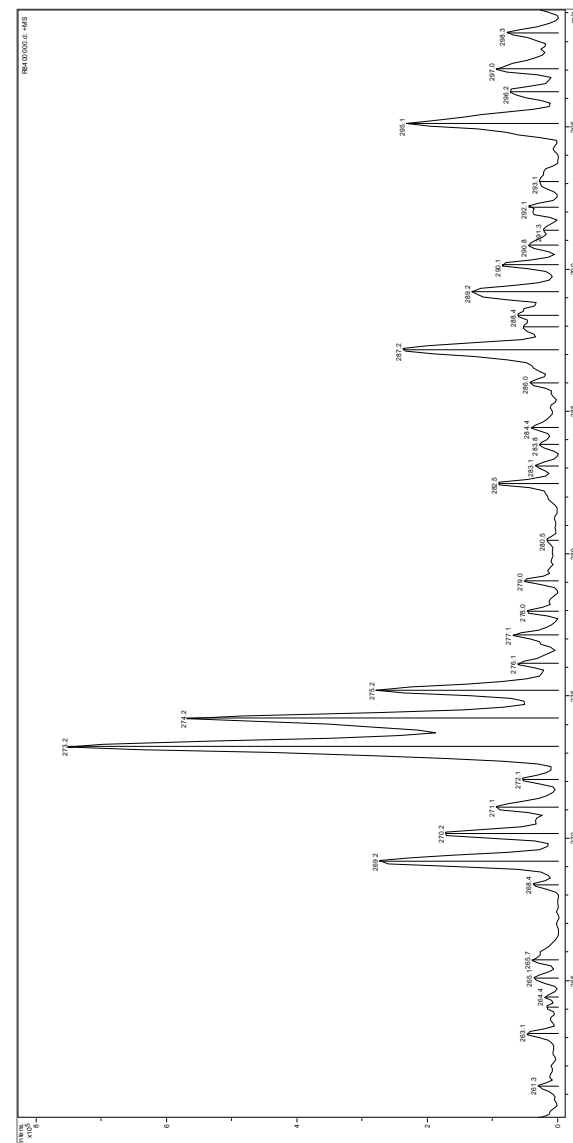

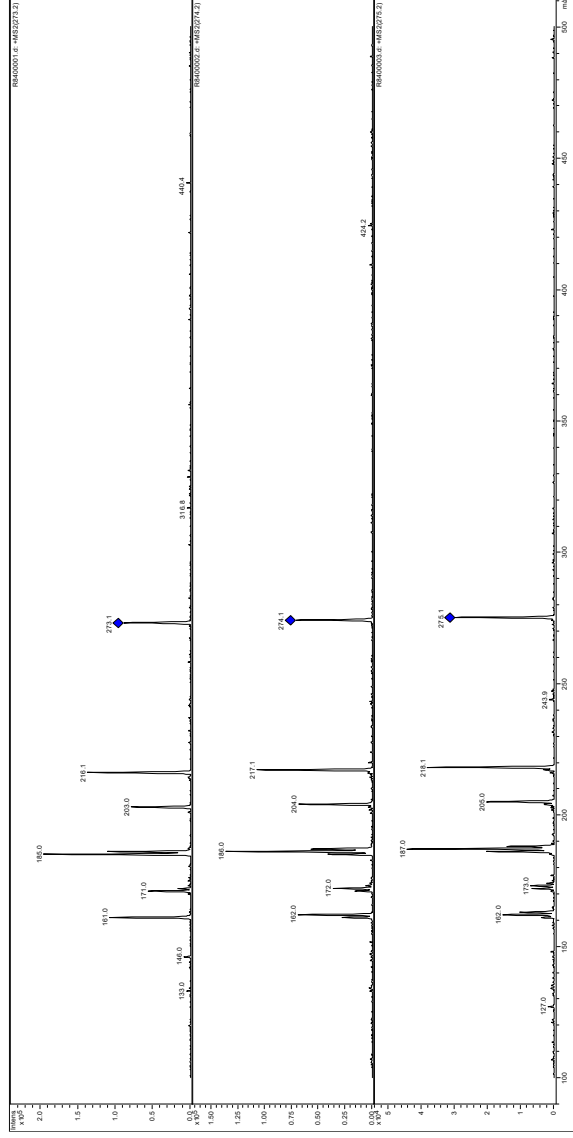

**Figure S8l.** MS<sup>2</sup> of molecular ions of **6e(5e)**

**Figure S8m.** Molecular ions and MS<sup>2</sup> at Molecular ions of **5e(2e)**

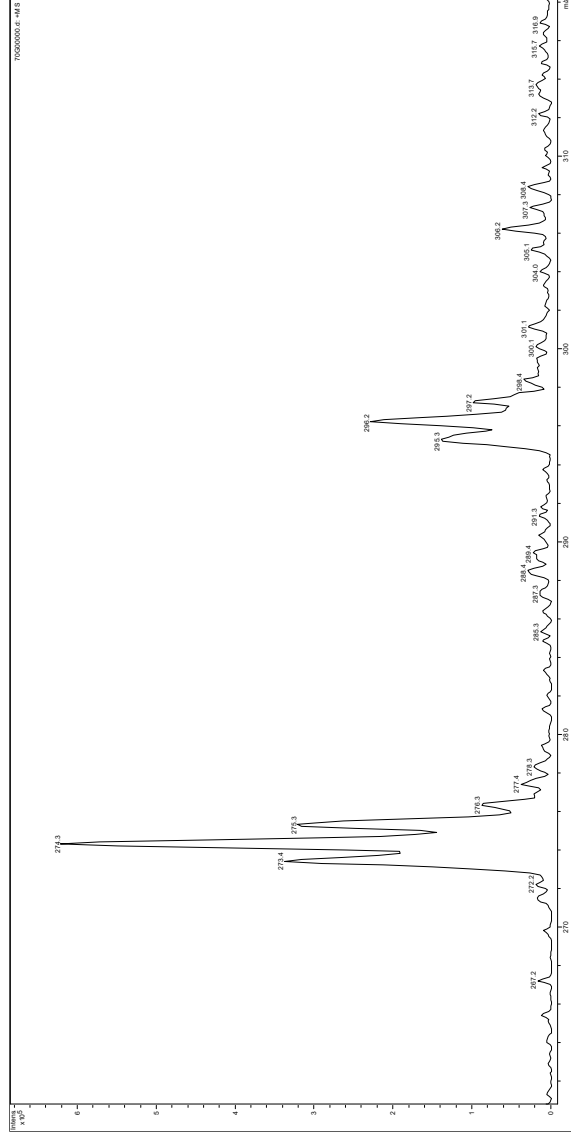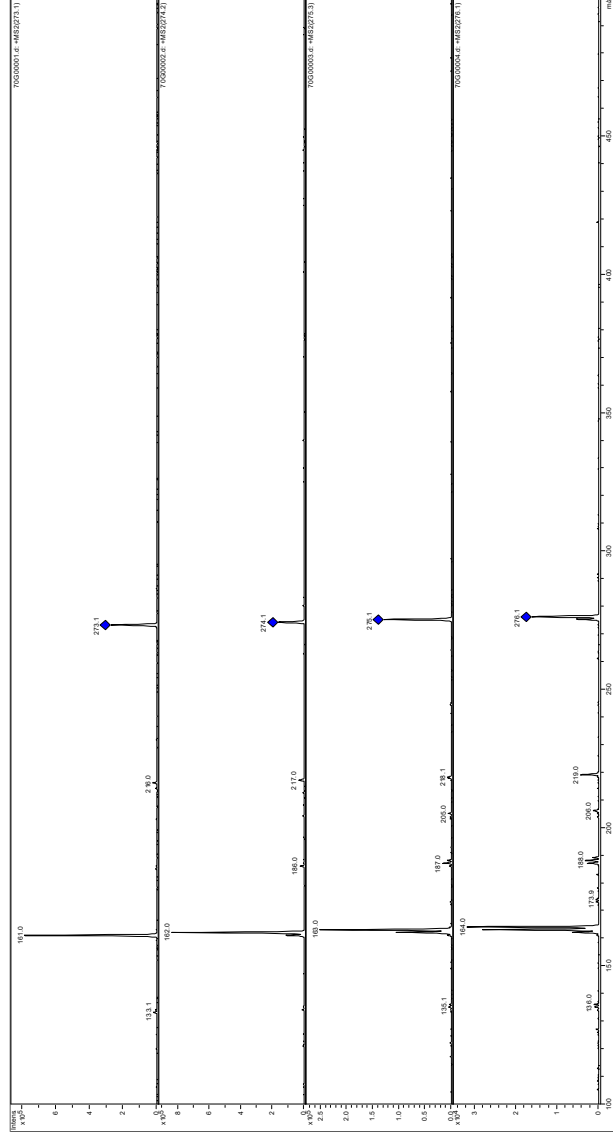

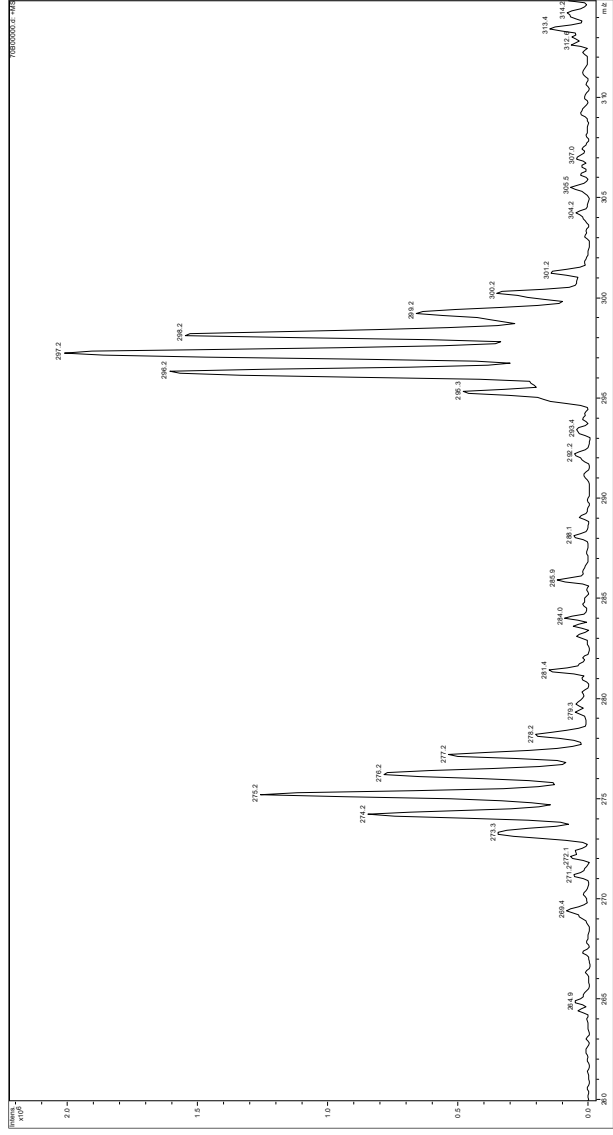

**Figure S8n.** Molecular ions and  $MS^2$  at Molecular ions of **6e(2e)**

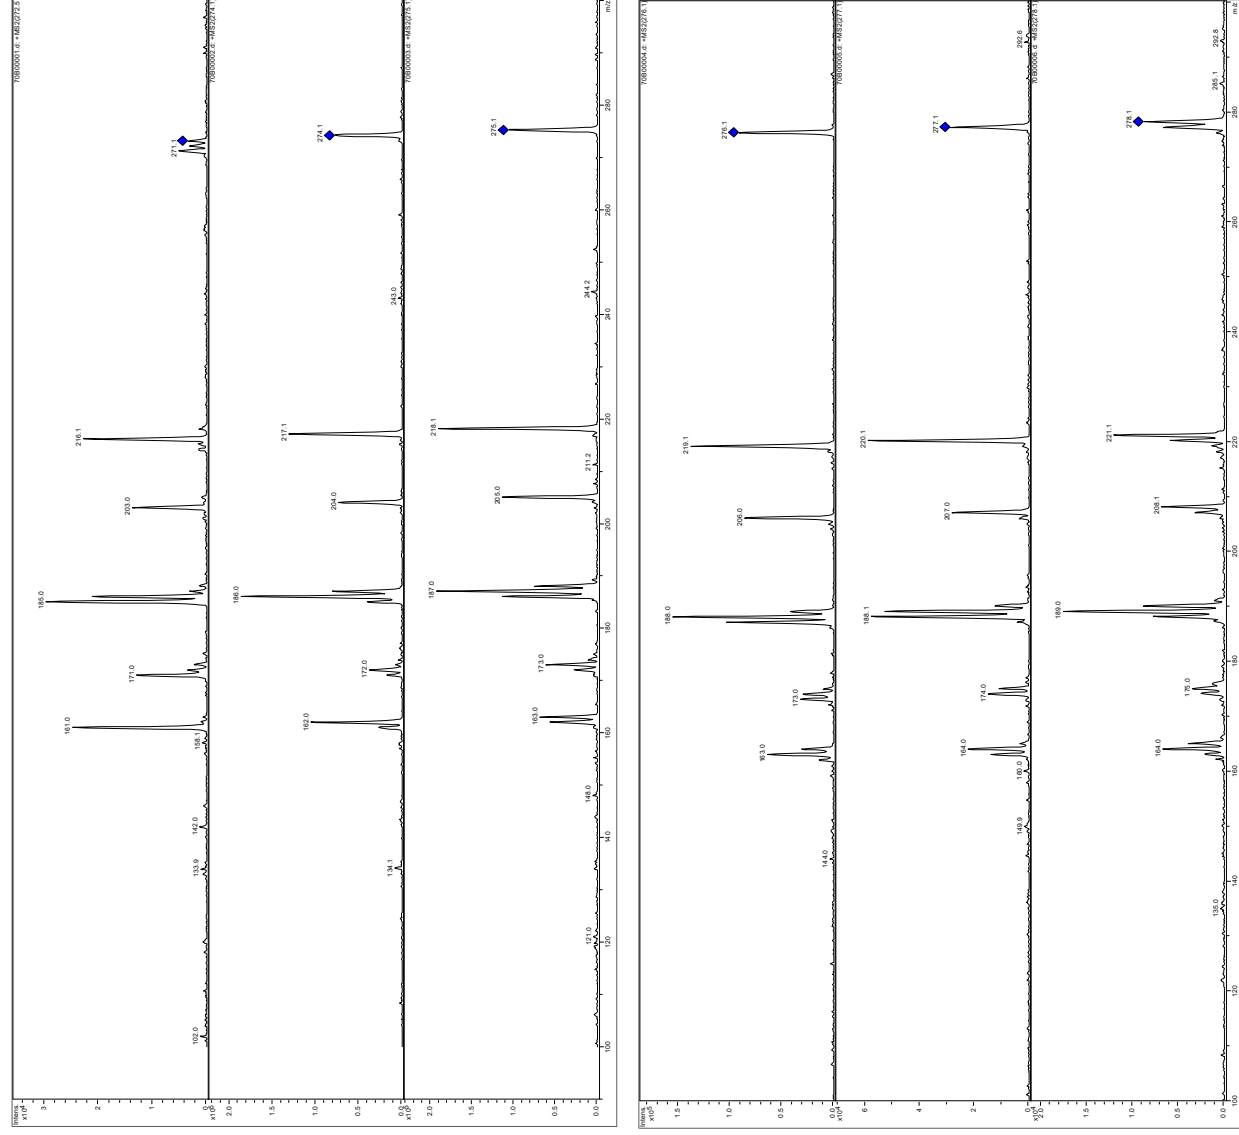

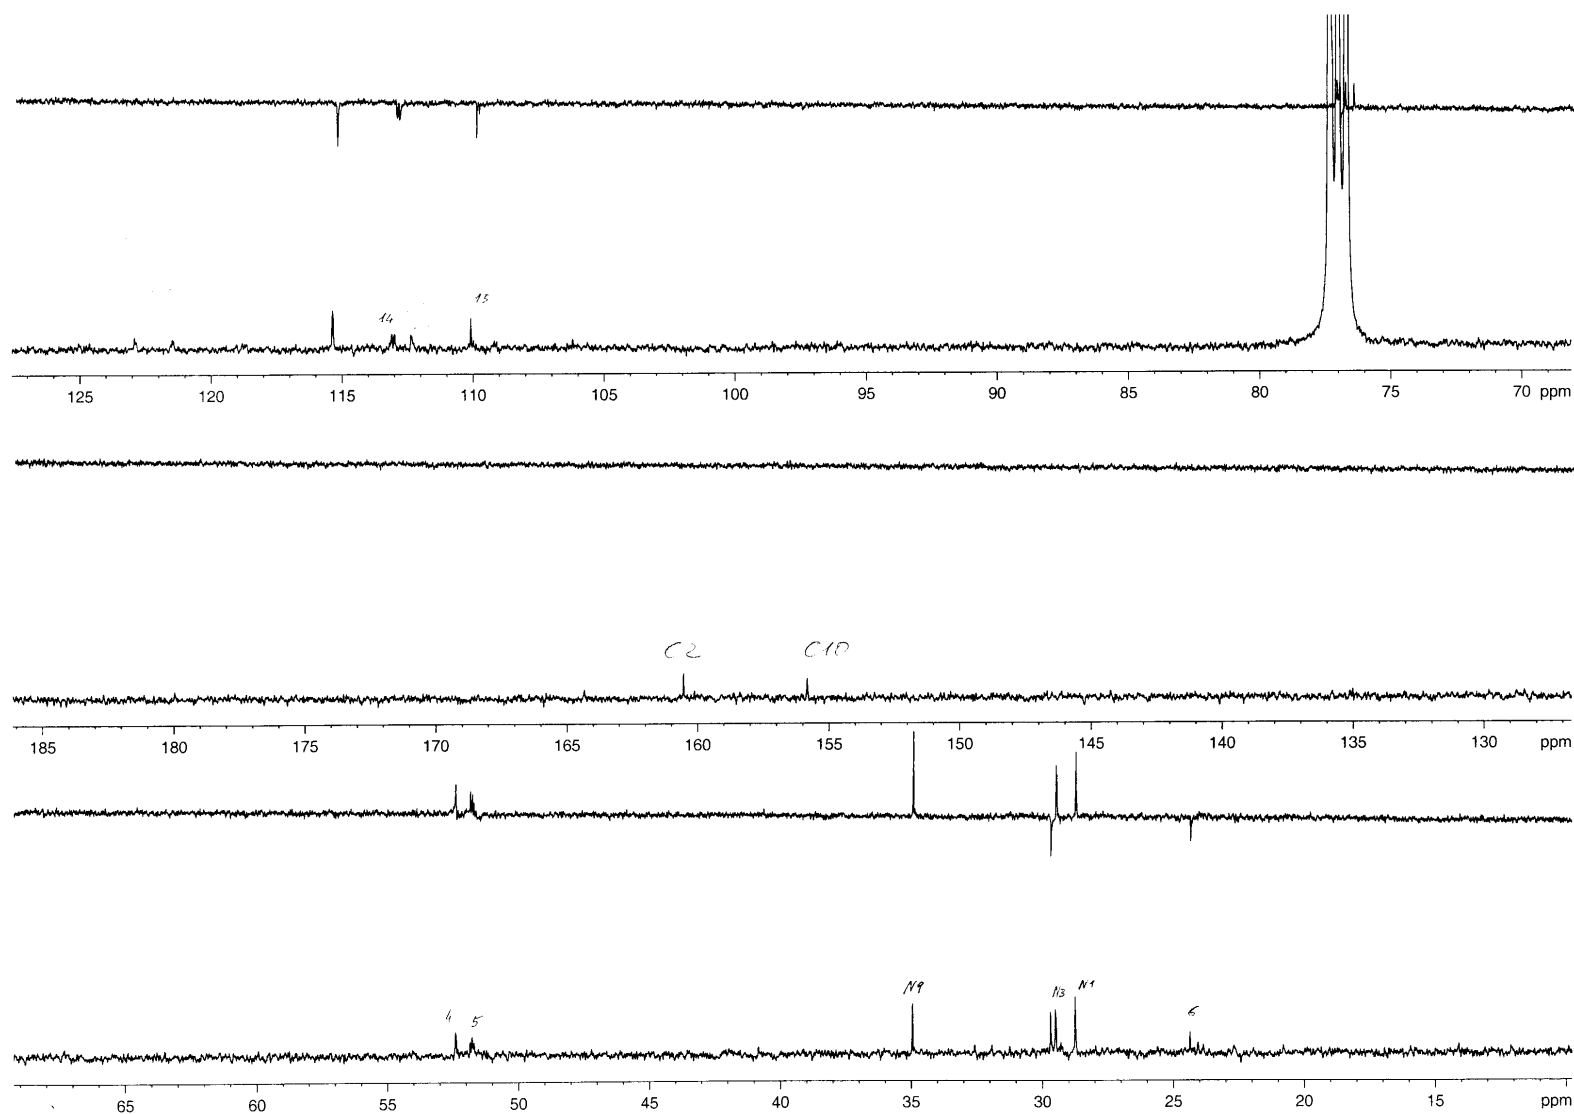

**Figure S8o.**

Three levels plot of  $^{13}\text{C}$ -NMR and DEPT spectra of partially deuterated **6e(2e)**.

NB. Automated processing failed the proper phasing of DEPT-135.

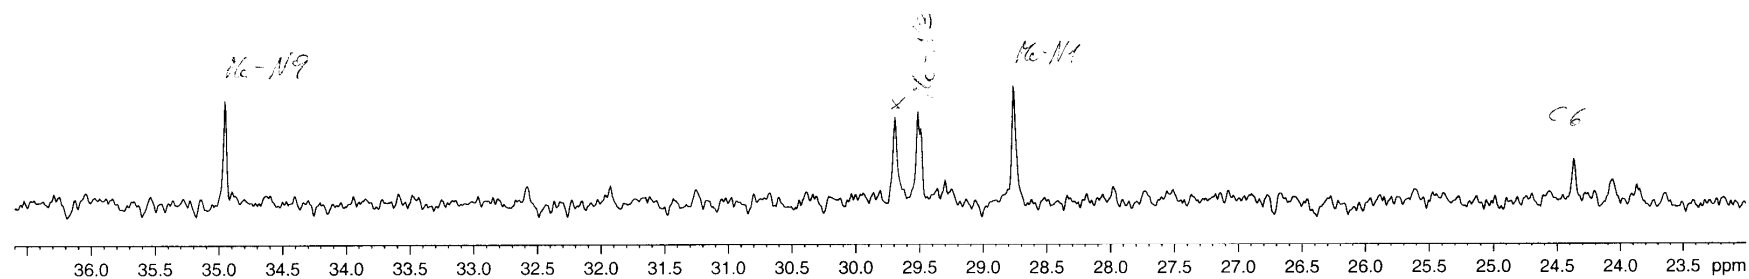

**Figure S8p.**

Enlarged plot of  $^{13}\text{C}$ -NMR spectrum of partially deuterated **6e(2e)**

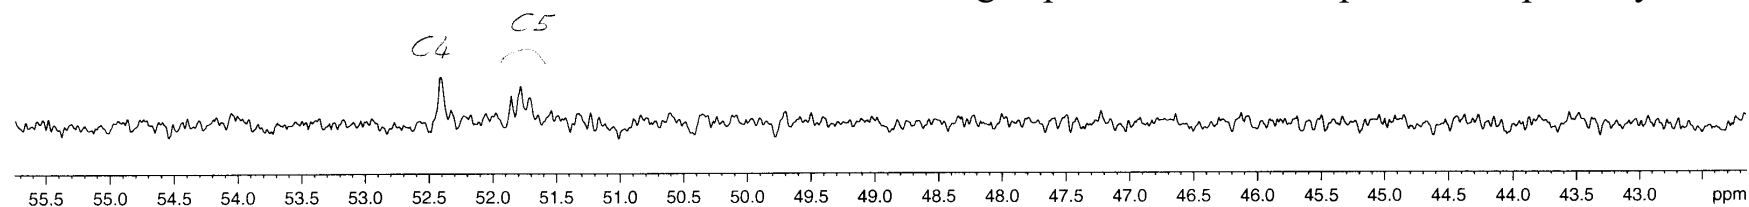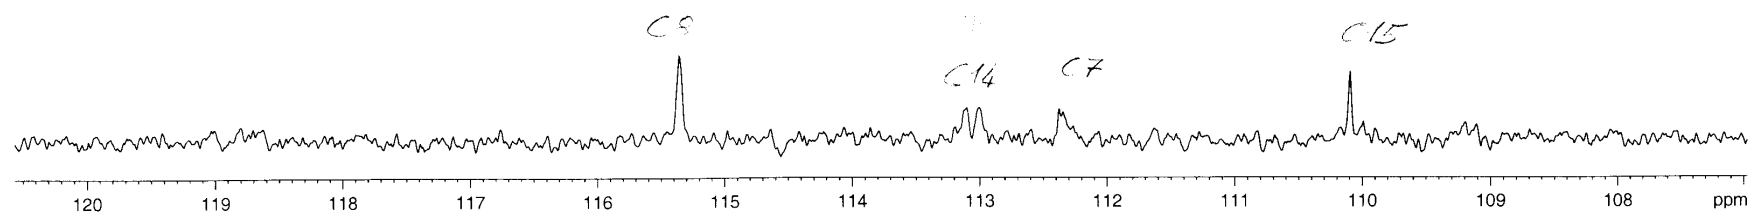

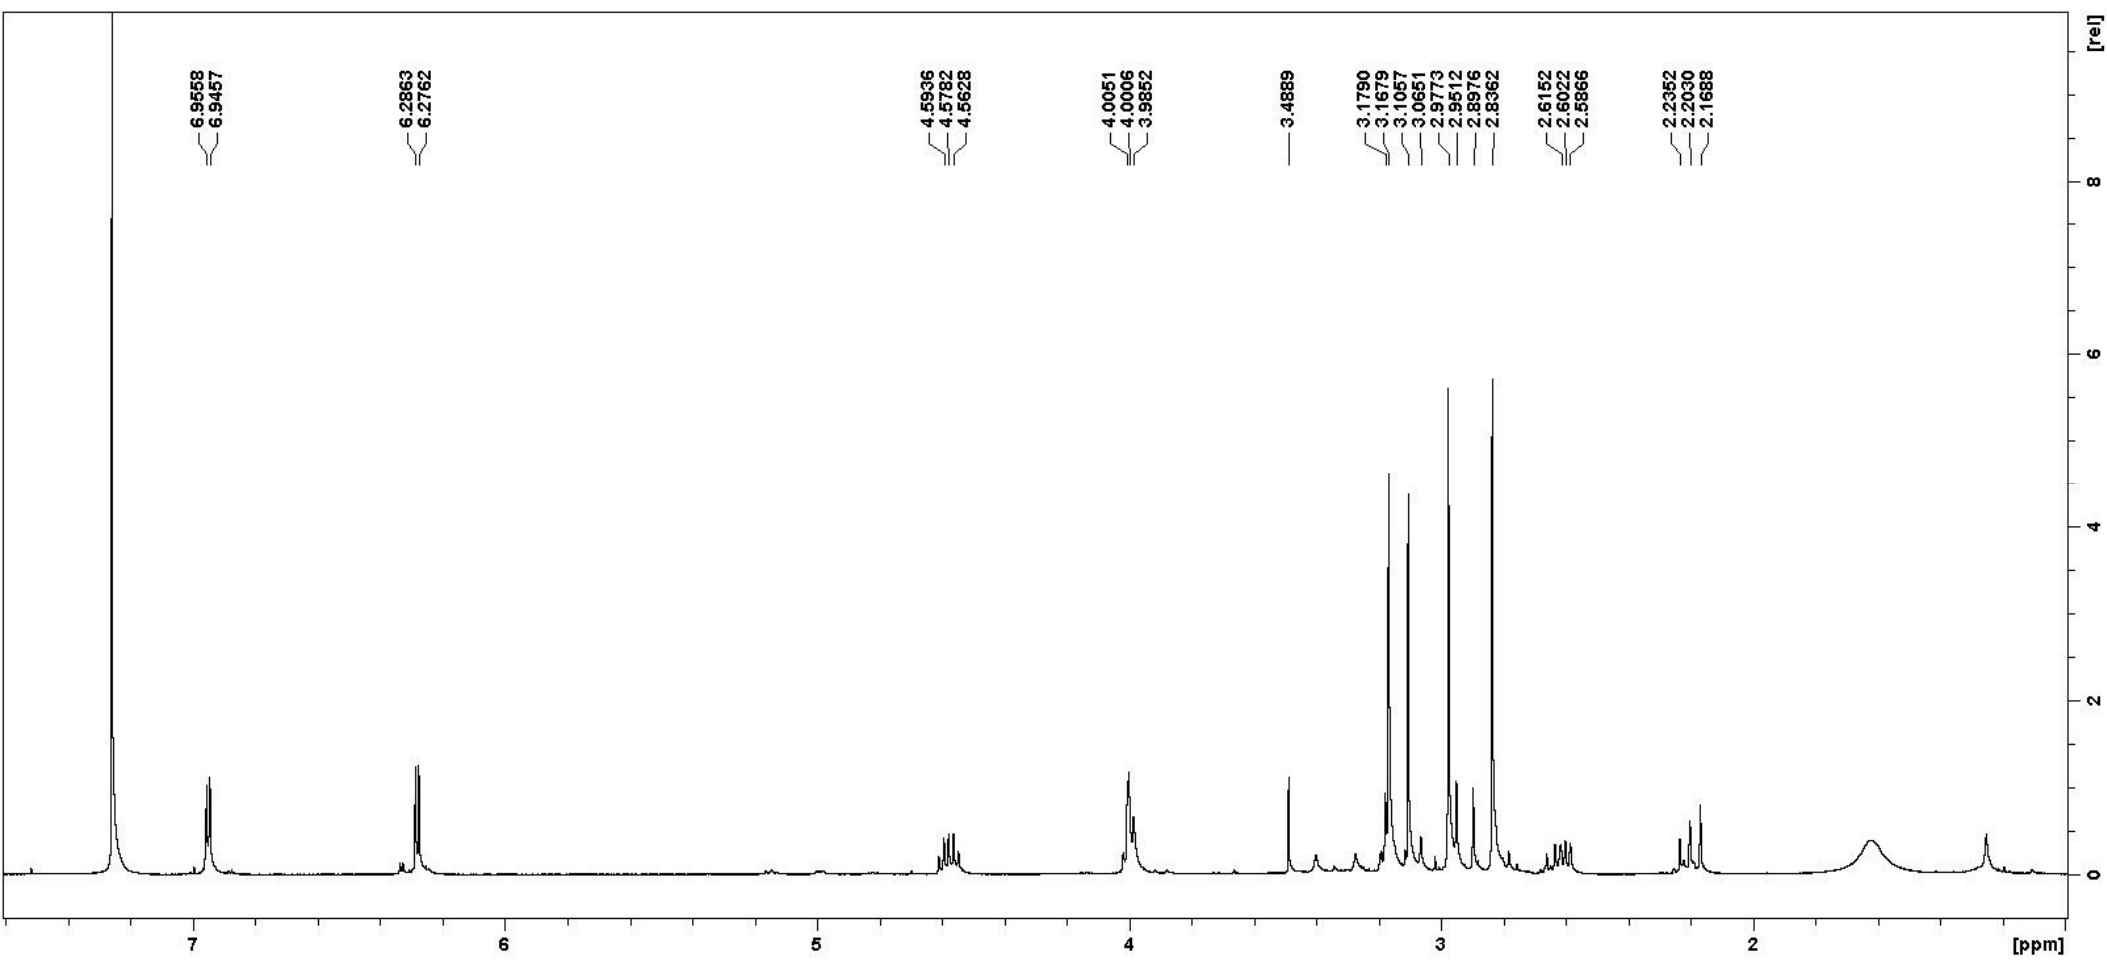

**Figure S9a.** 2e for reaction performed in the NMR tube

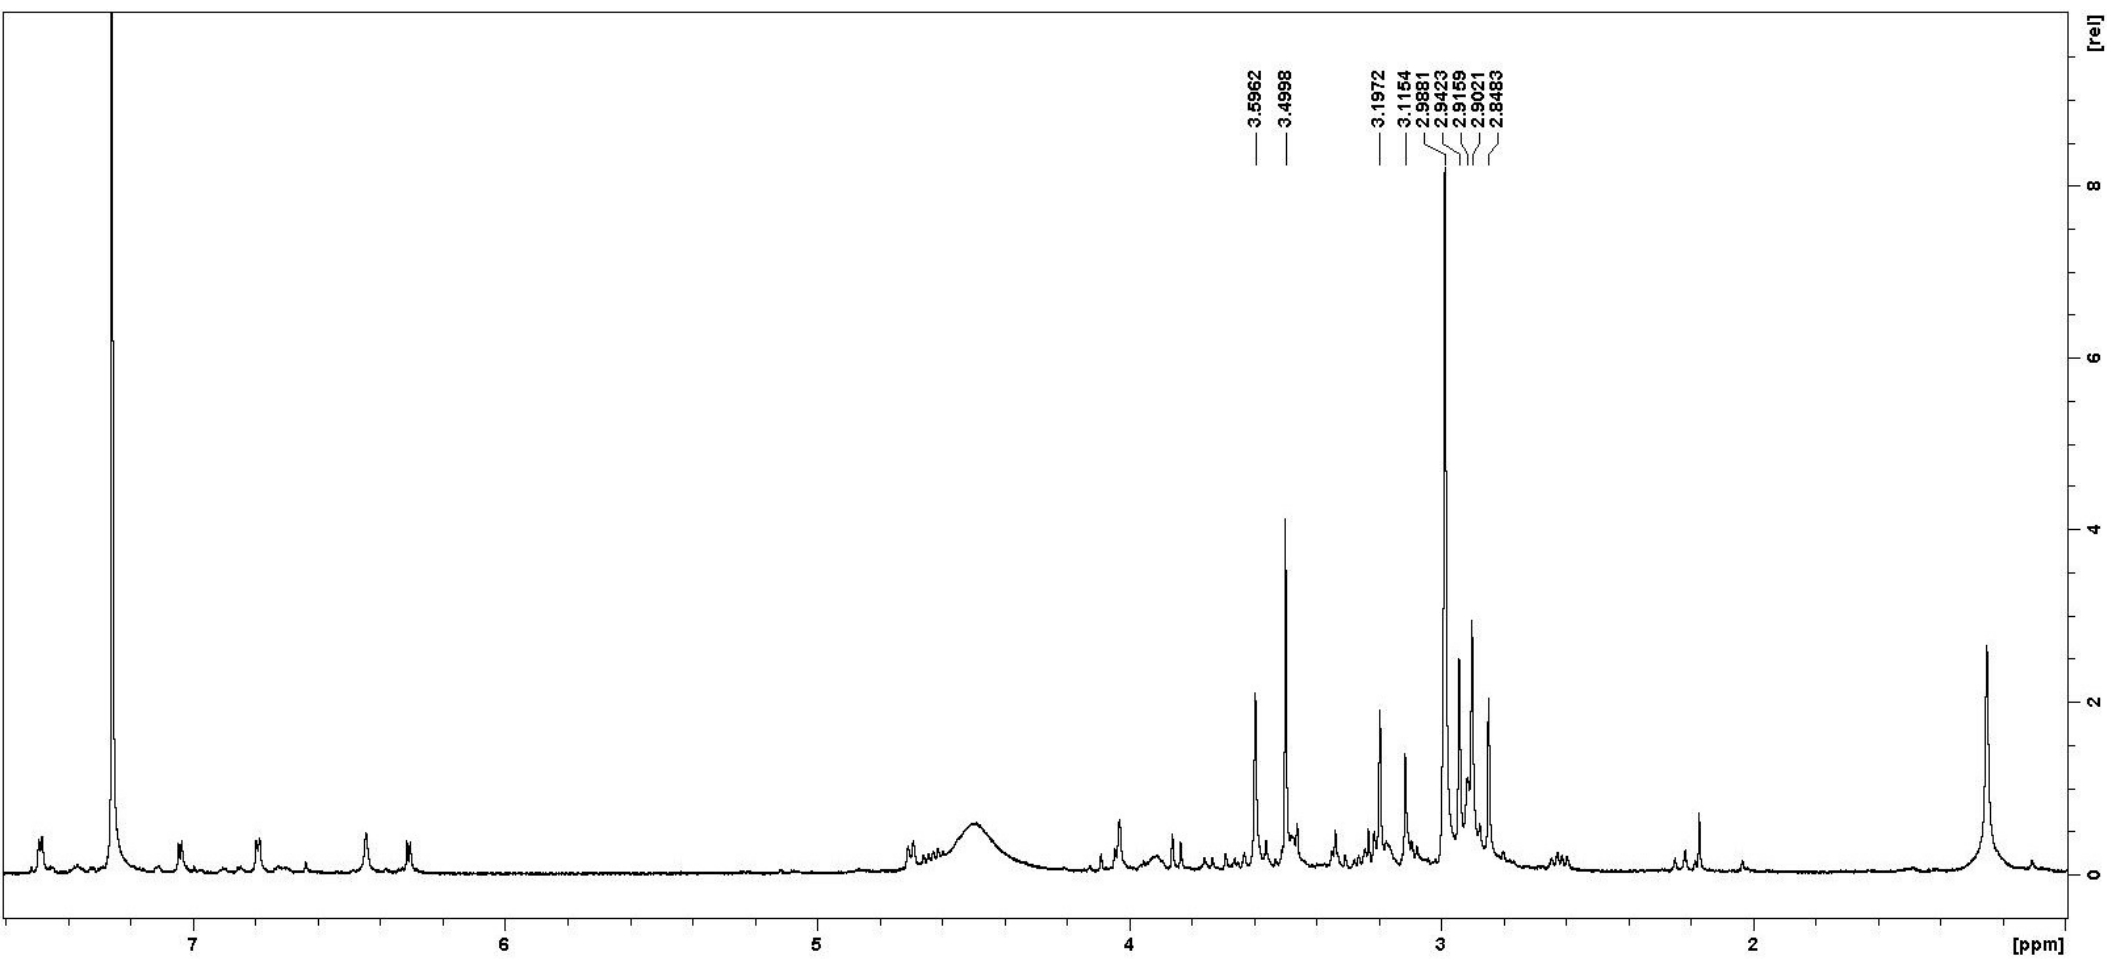

**Figure S9b.** – **2e** + MsOH in CDCl<sub>3</sub> 65° , 30' = **2e** \ **6e** 50:50

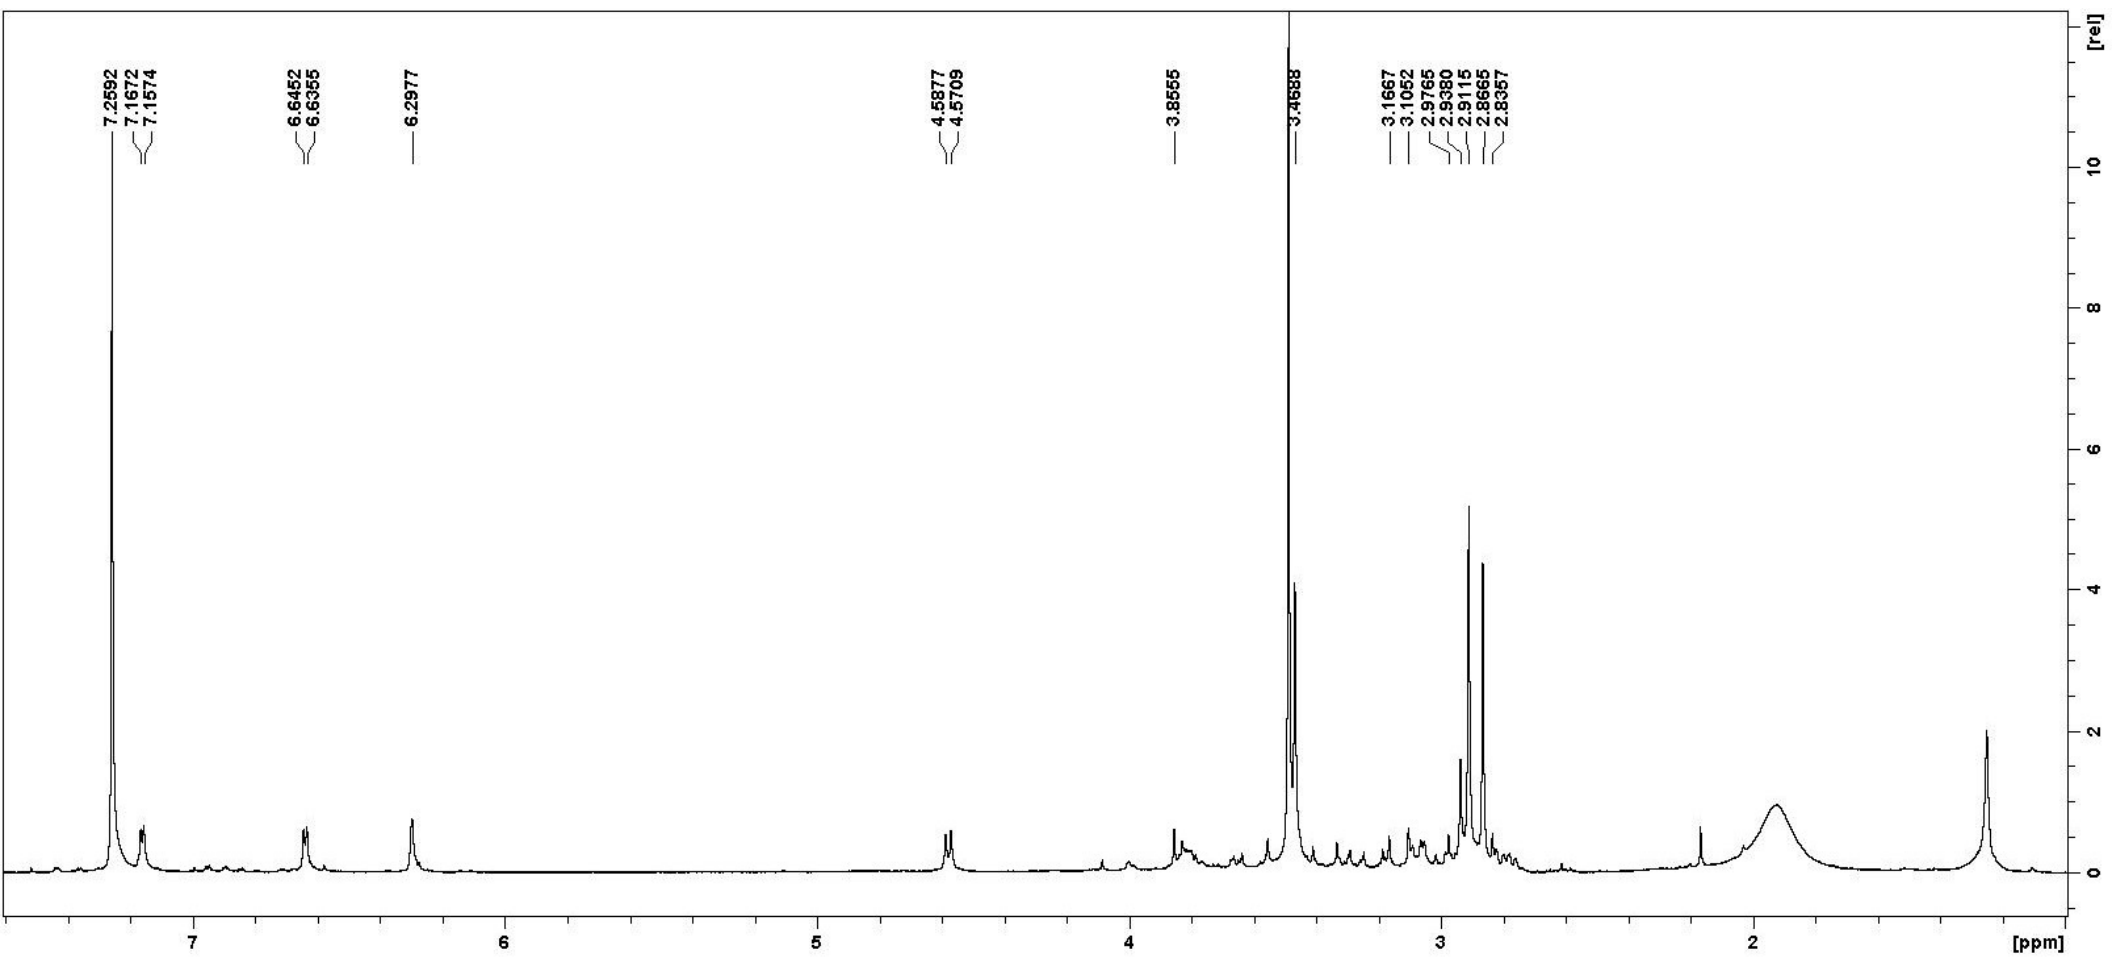

**Figure S9c.** – 2e + MsOH in CDCl<sub>3</sub> 65° , 60' then A21 6e



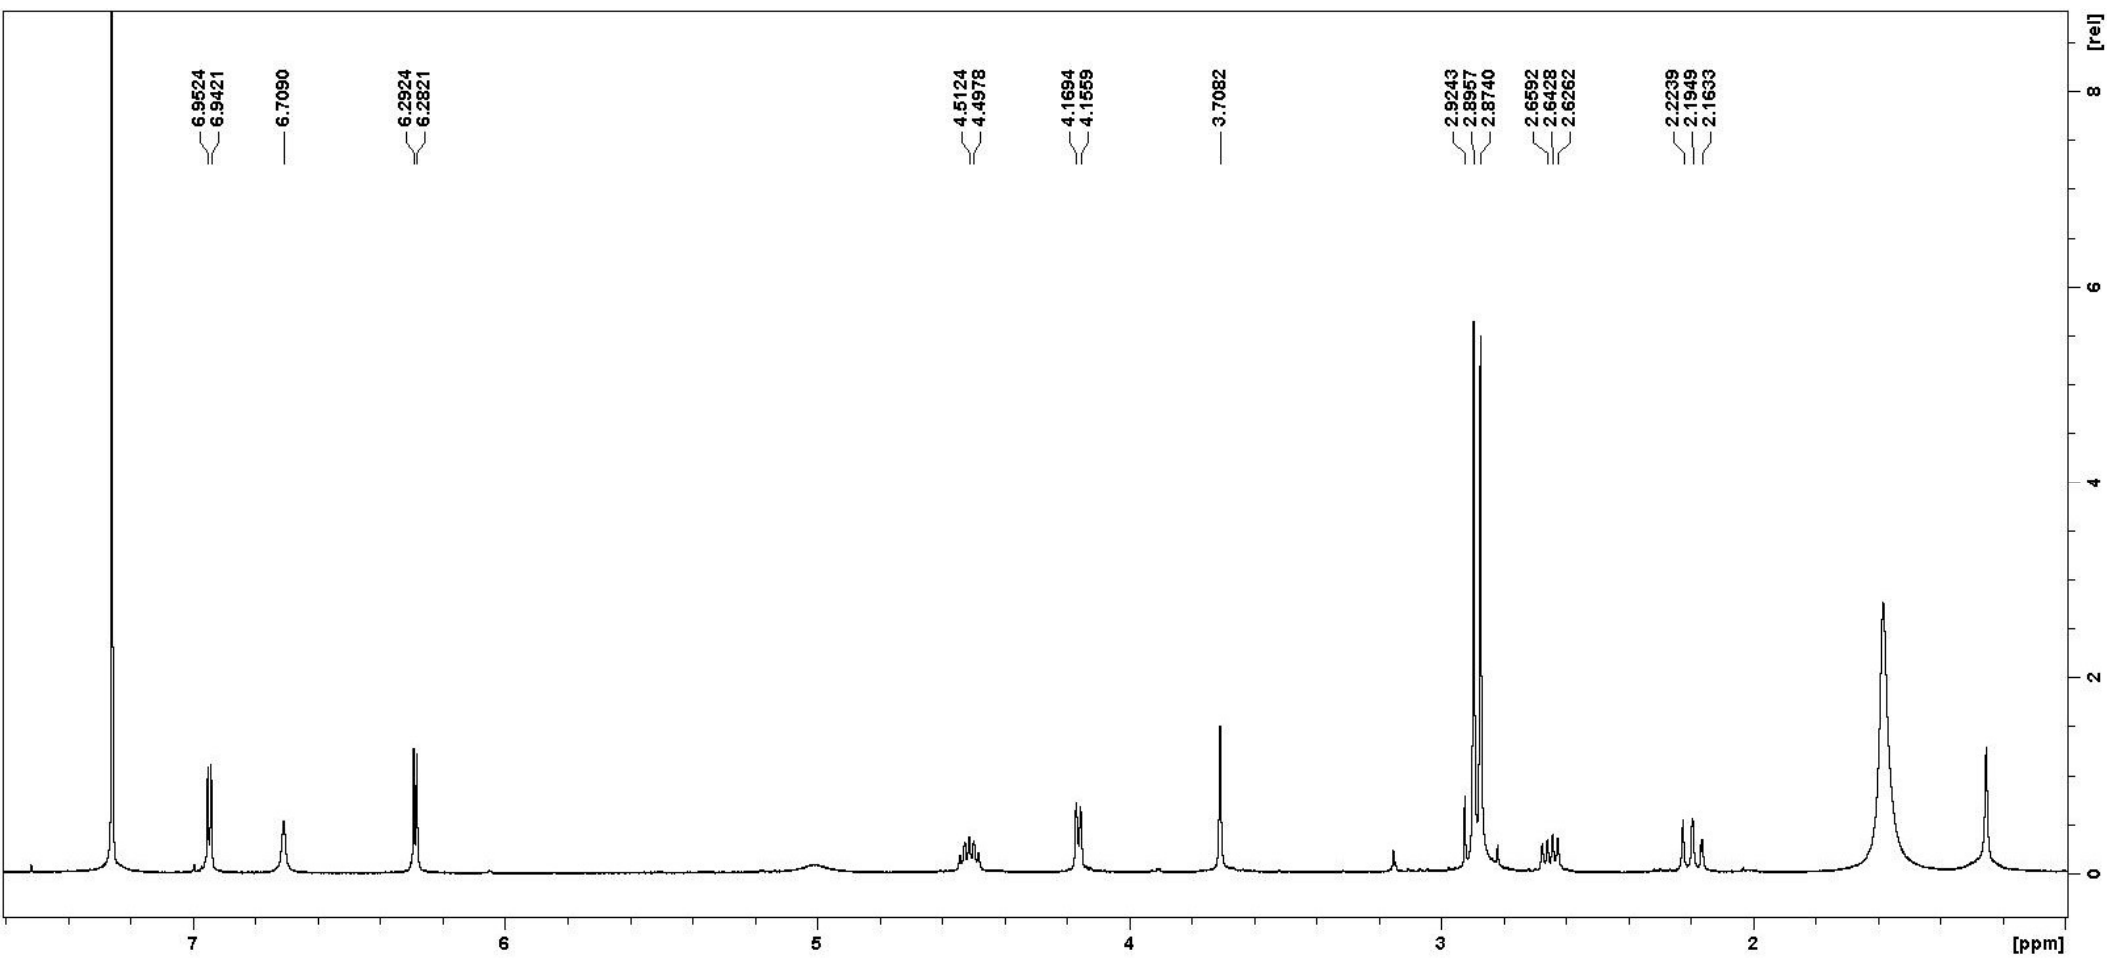

**Figure S9d.** – 1m for reaction performed in the NMR tube

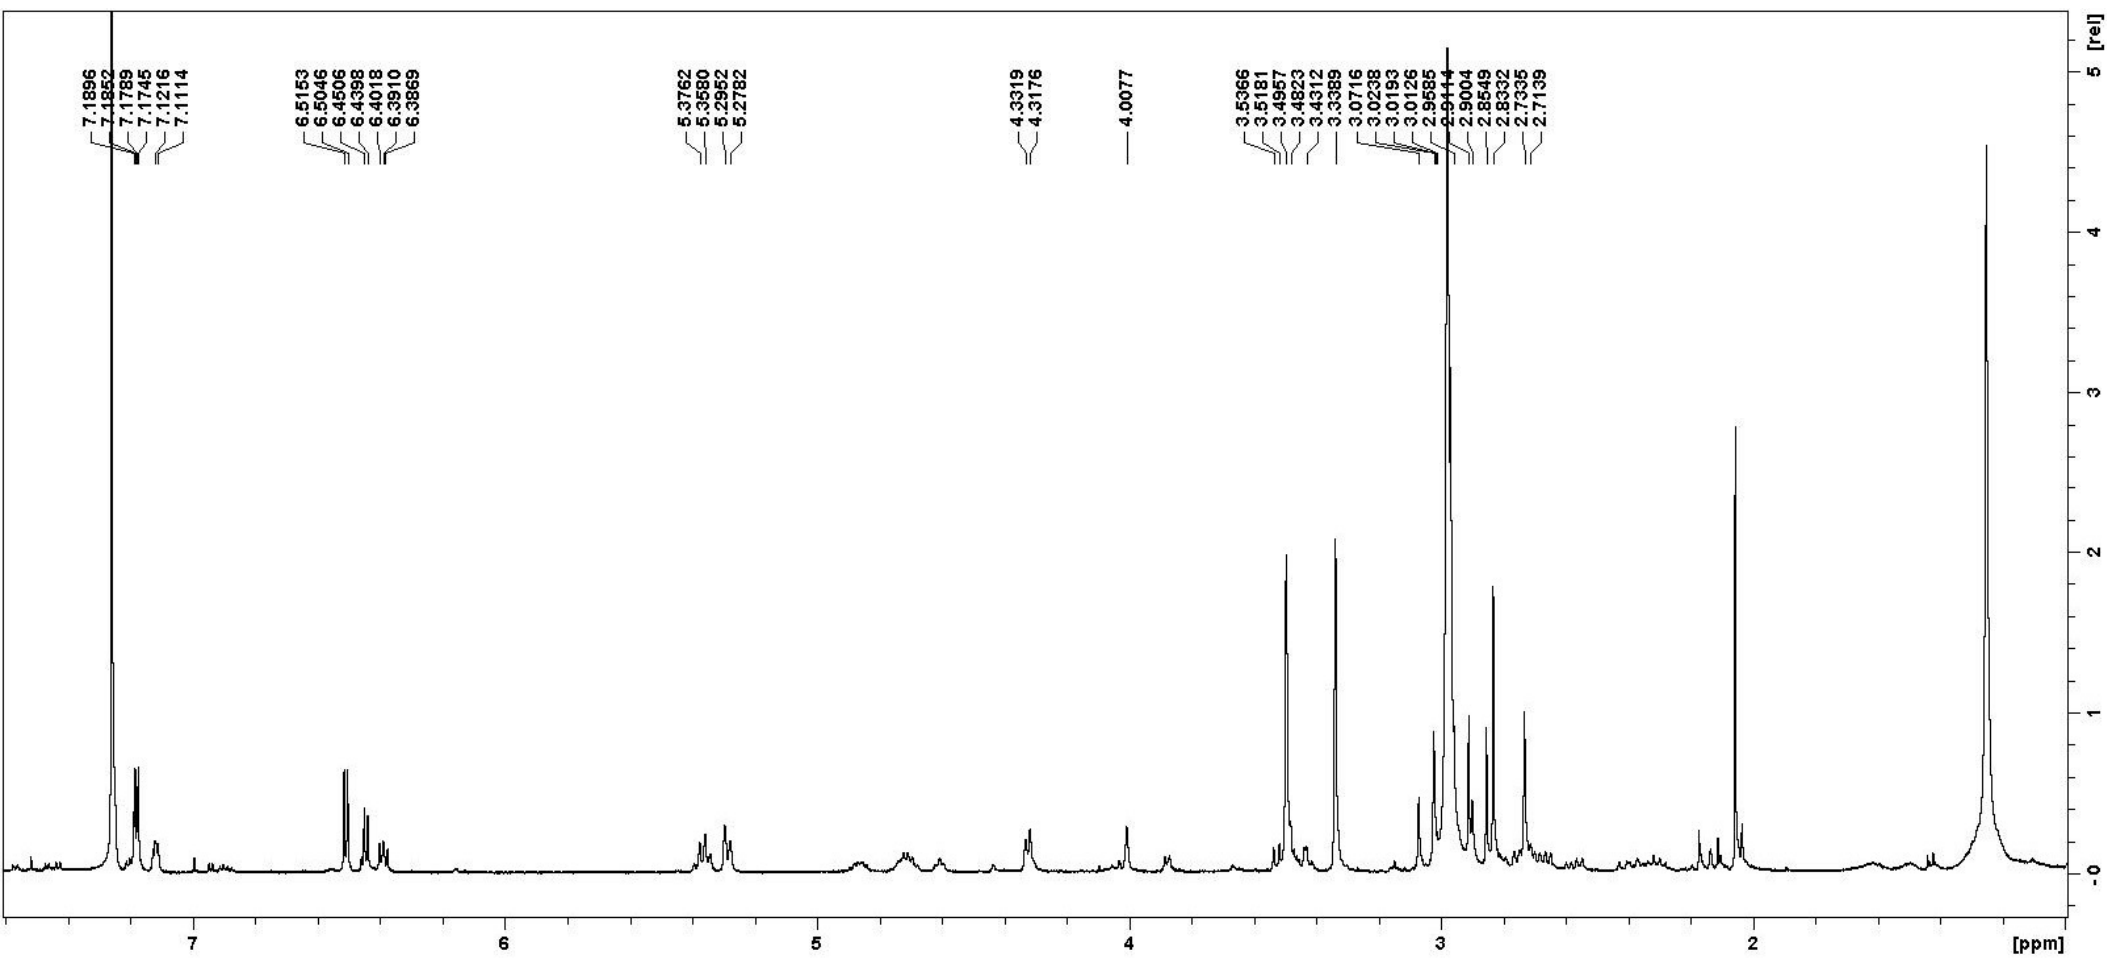

**Figure S9e.** – 1m + MsOH in CDCl<sub>3</sub> 65° ,430' => 1m + 3m

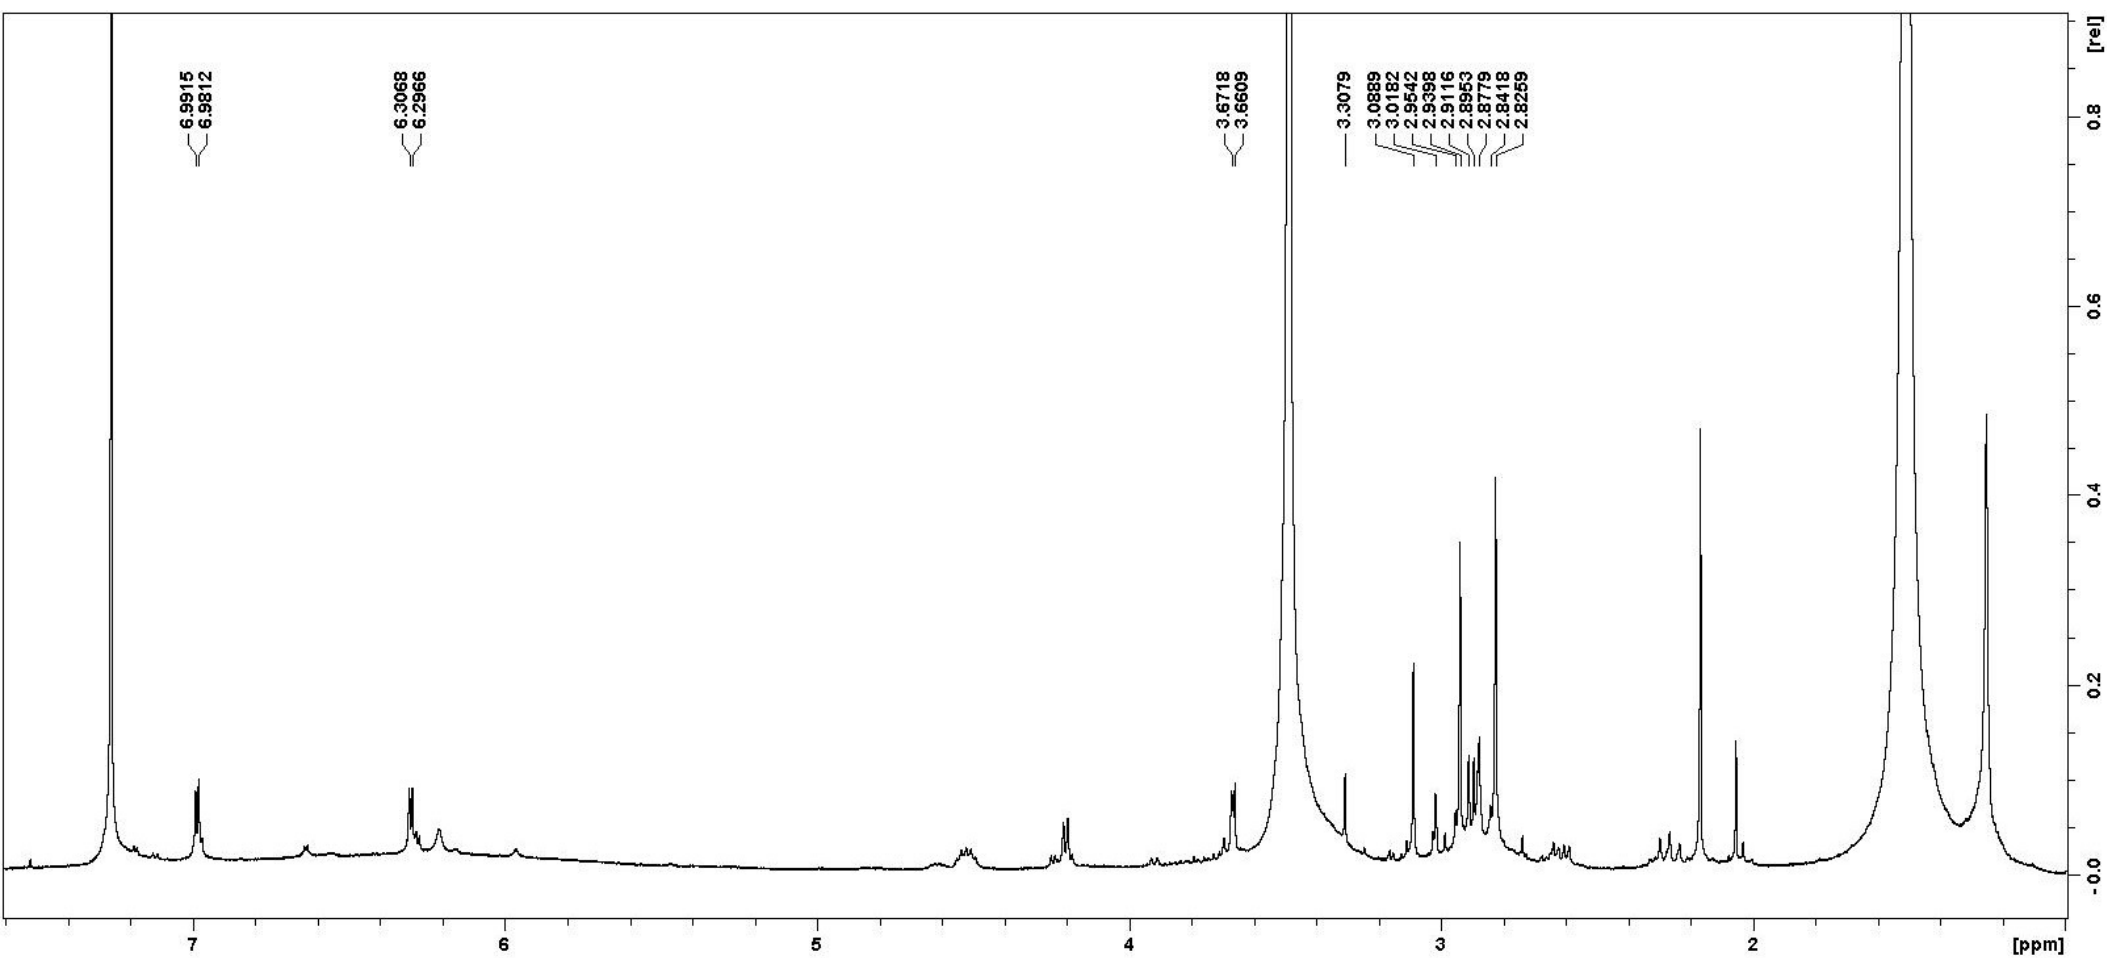

**Figure S9f.** – **1m** + MsOH in CDCl<sub>3</sub> 65° ,430' , 1 day r.t. than A21 => **1m**

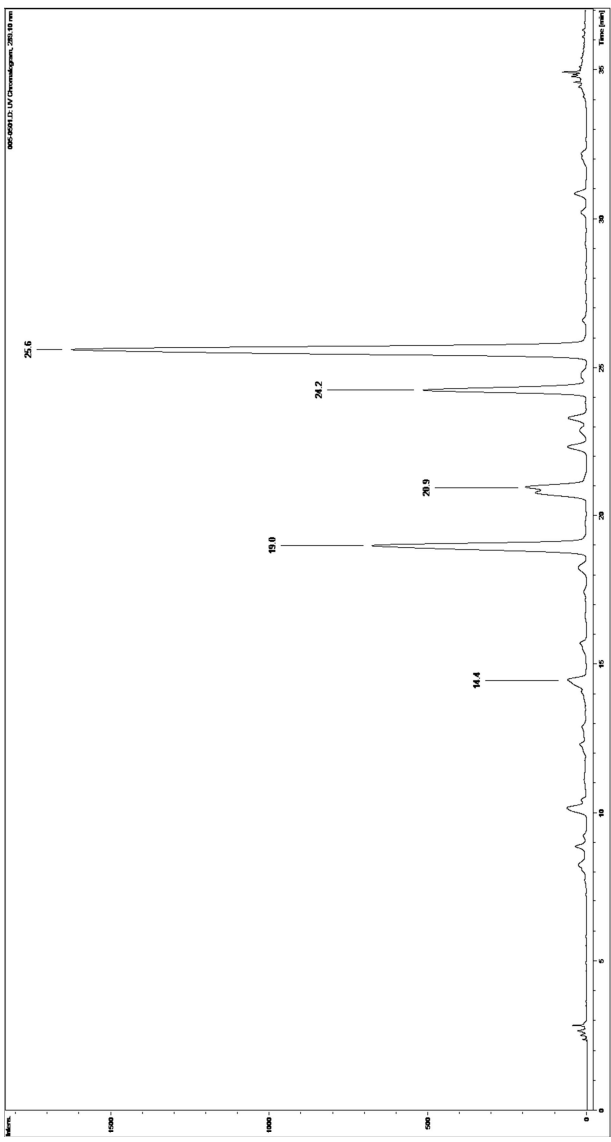

**Figure S9g.** HPLC chromatogram at  $\lambda = 289$  nm of (1m+MsOH) and mass spectra of peaks at  $t_R = 14,4$  (1'm),  $t_R = 19,0$  (1m),  $t_R = 20,9$  (10m),  $t_R = 25,6$  (2m)

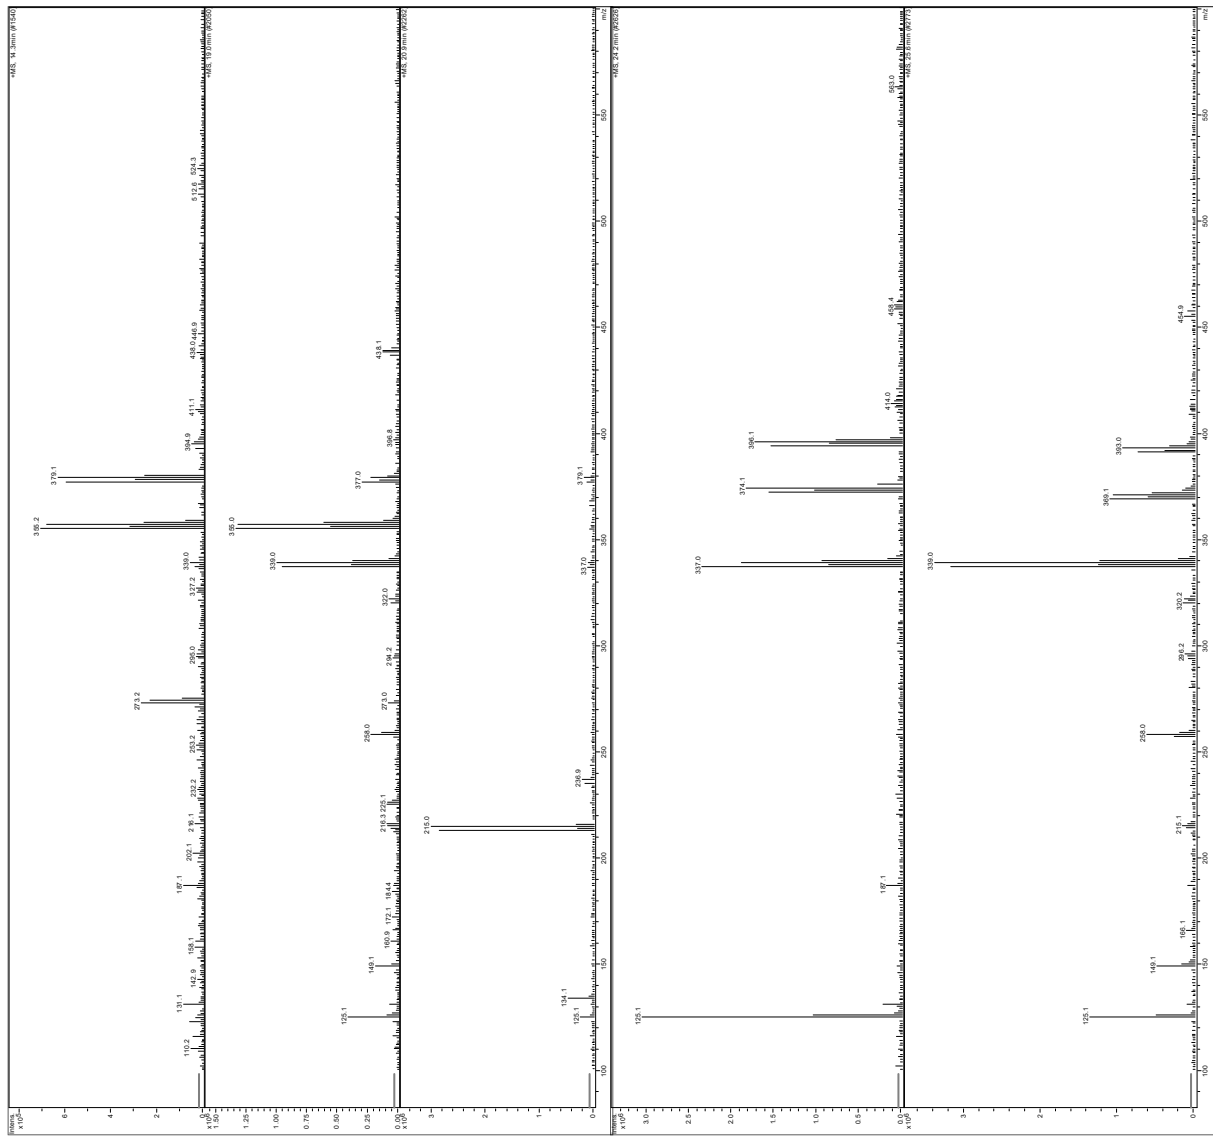

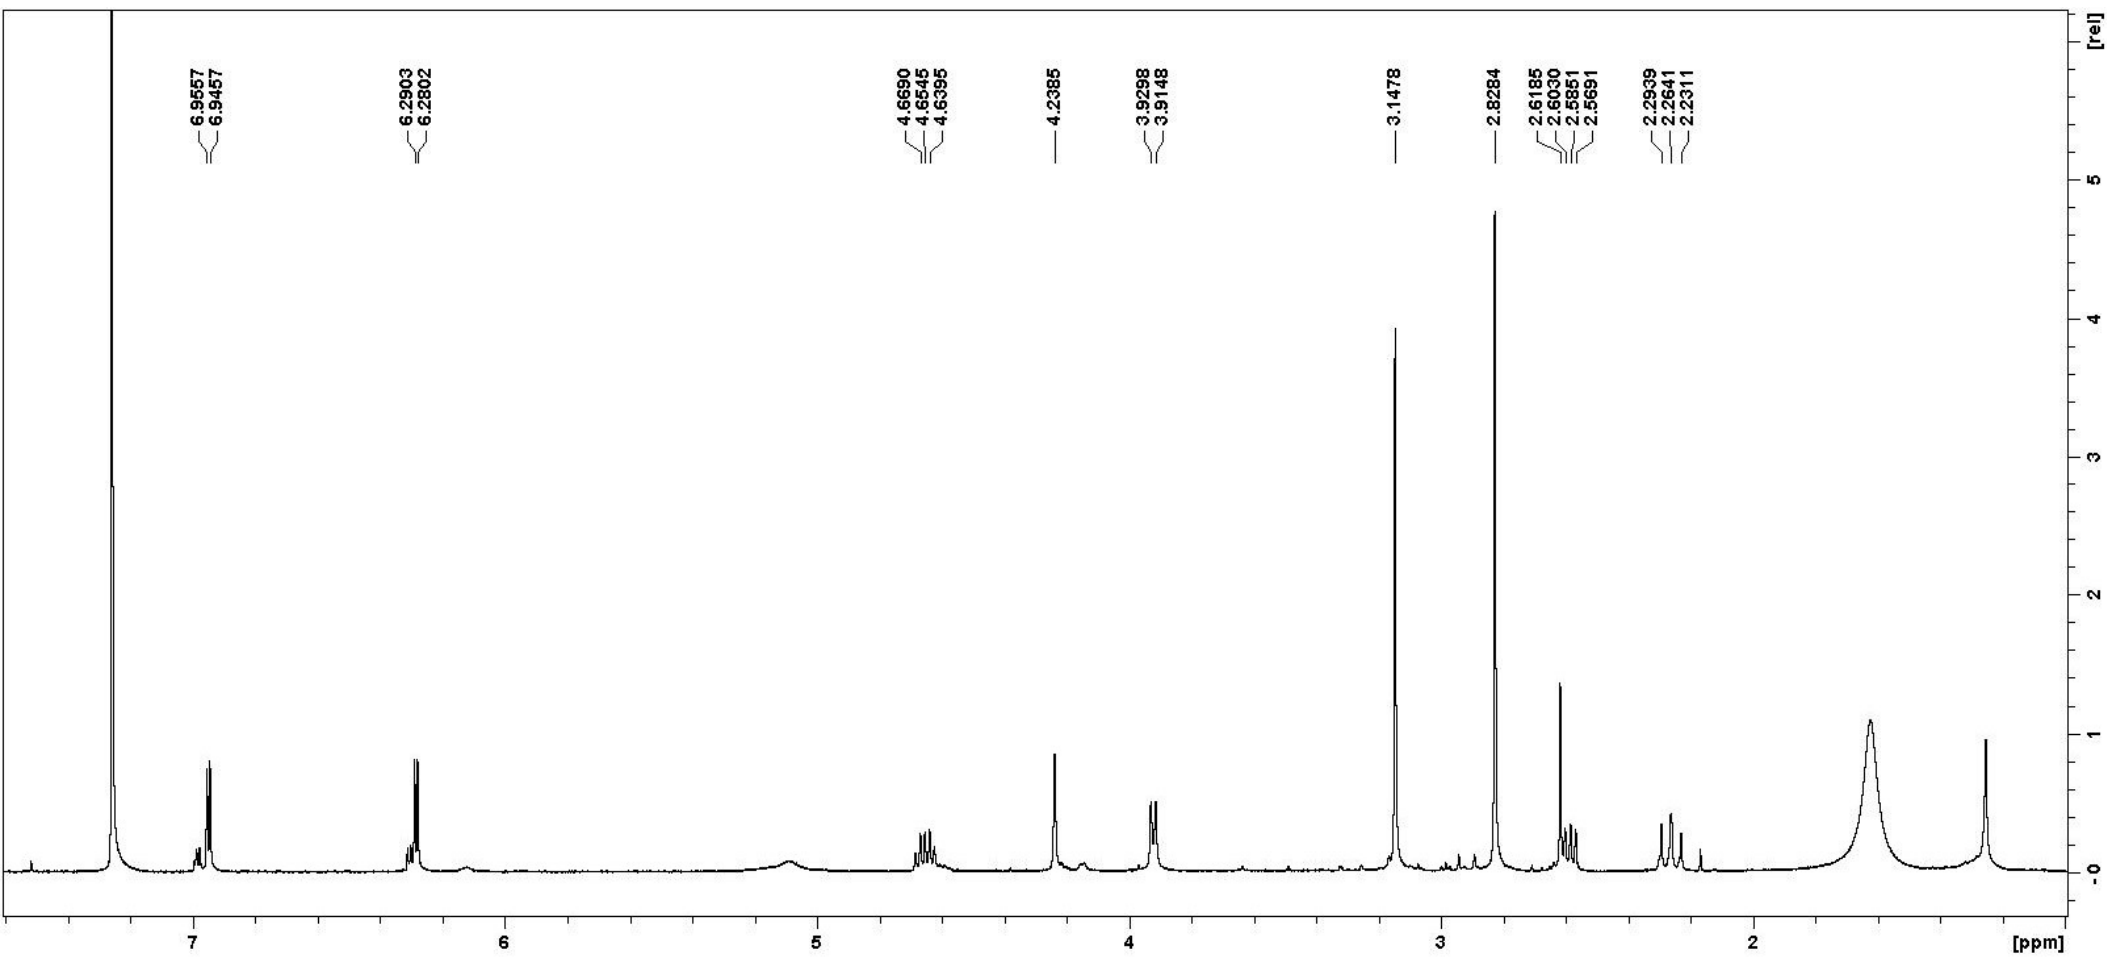

**Figure S9h.** – **1d** for reaction performed in the NMR tube

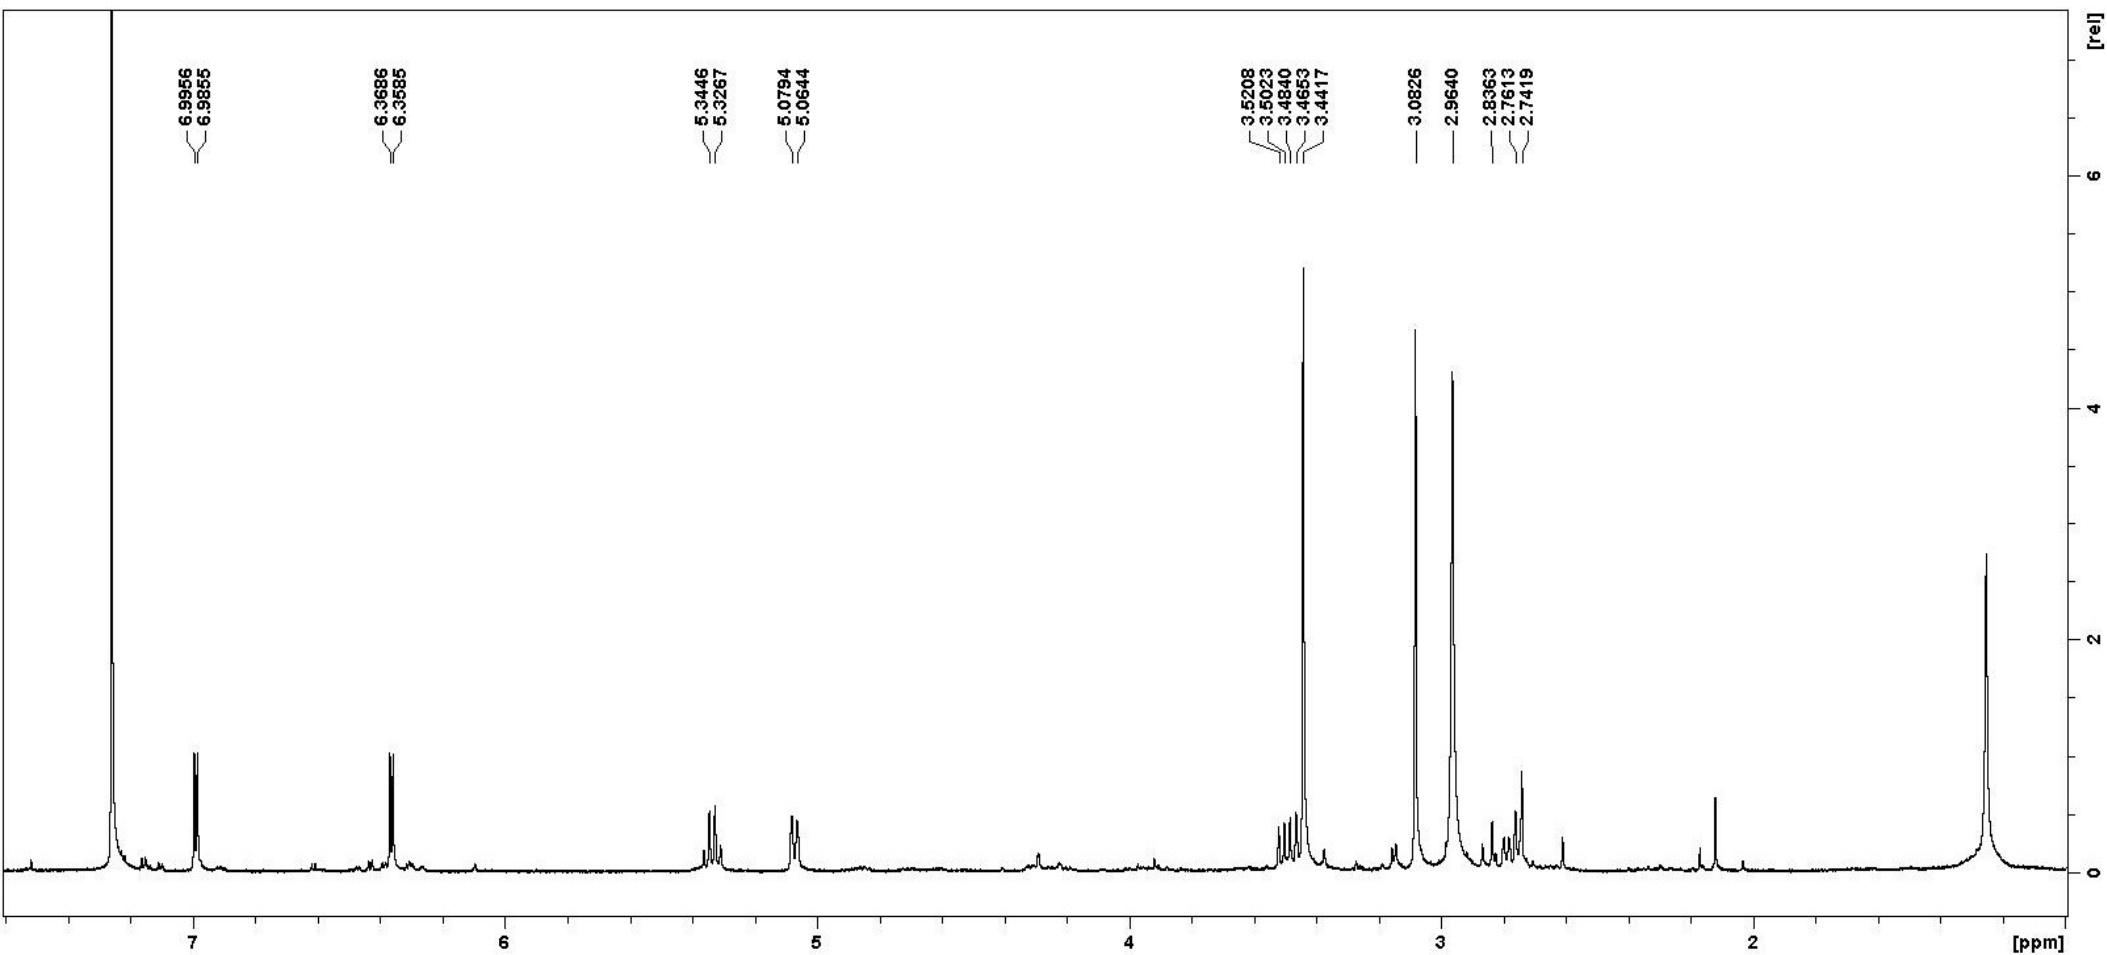

**Figure S9i.** – **1d** + MsOH in CDCl<sub>3</sub> 65° ,40' => **3d**

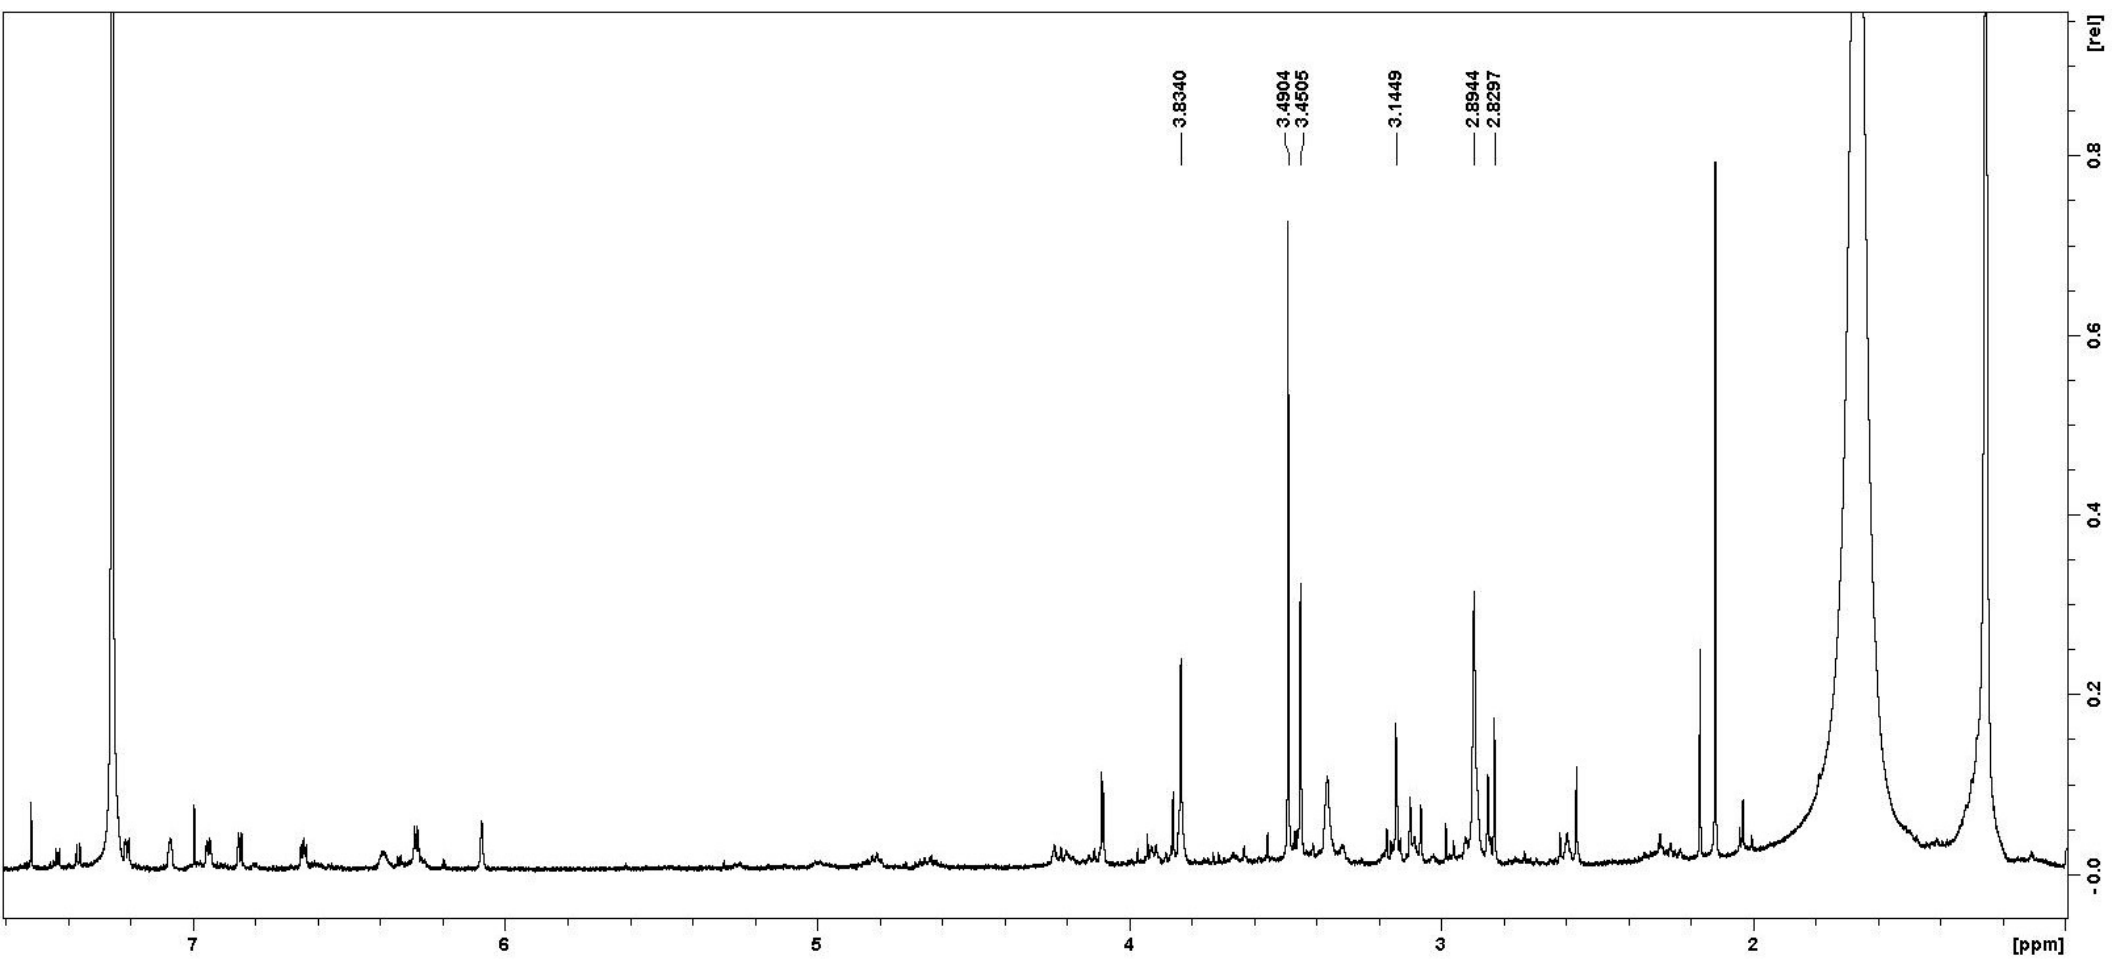

**Figure S9j.** – **1d** + MsOH in CDCl<sub>3</sub> 65° , 240' than A21 => **5d**

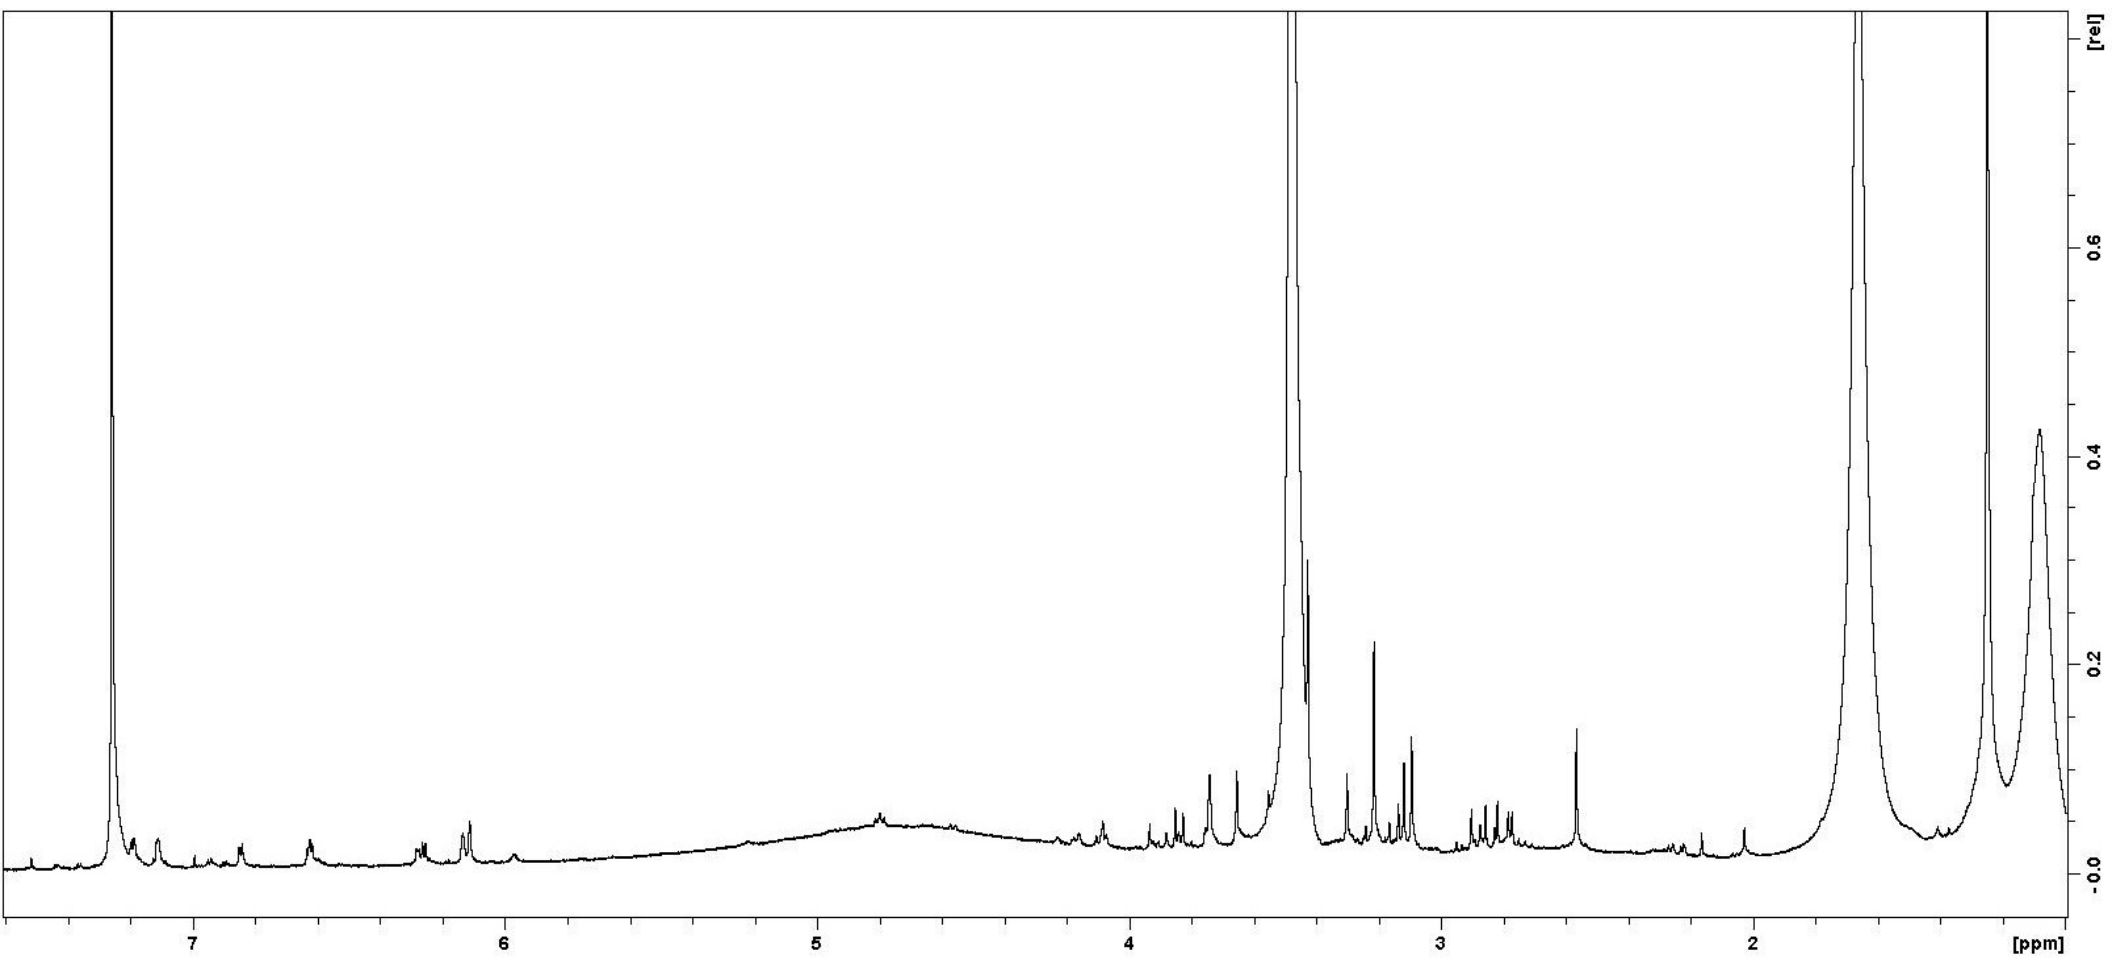

**Figure S9k.** – **2d** + MsOH in  $\text{CDCl}_3$  65° , 70' than A21 => **5d** for LC-MS



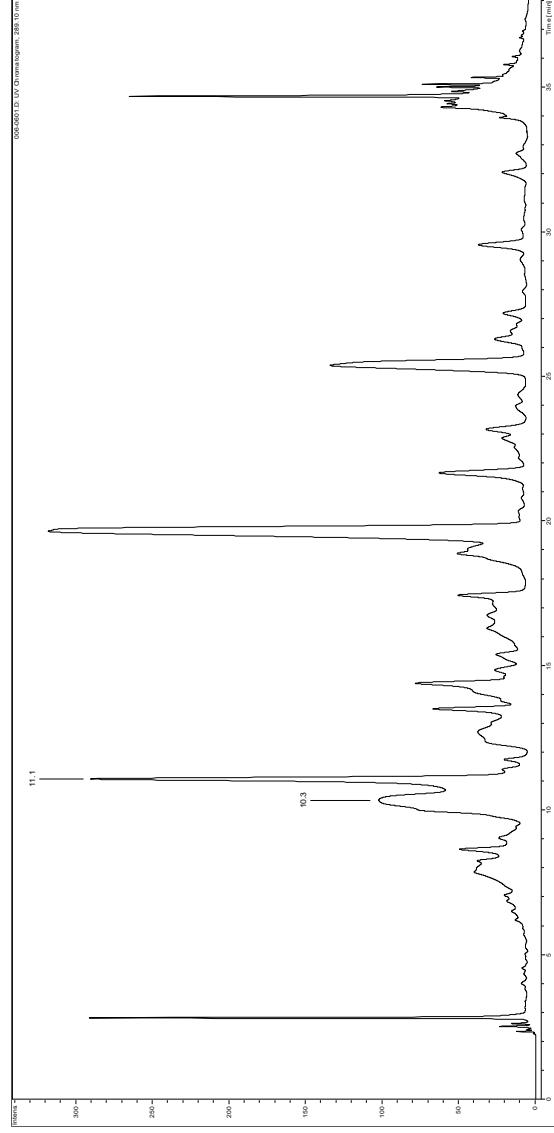

**Figure S9I.** HPLC chromatogram at  $\lambda = 289$  nm of **(2d)** +MsOH), mass spectrum of peak at  $t_R = 19,6$  (**2d**) and MS<sup>2</sup> fragmentation of peaks at  $t_R = 7,1$  & 8,7 (**6d**),  $t_R = 10,4$  & 11,3 (**5d**).

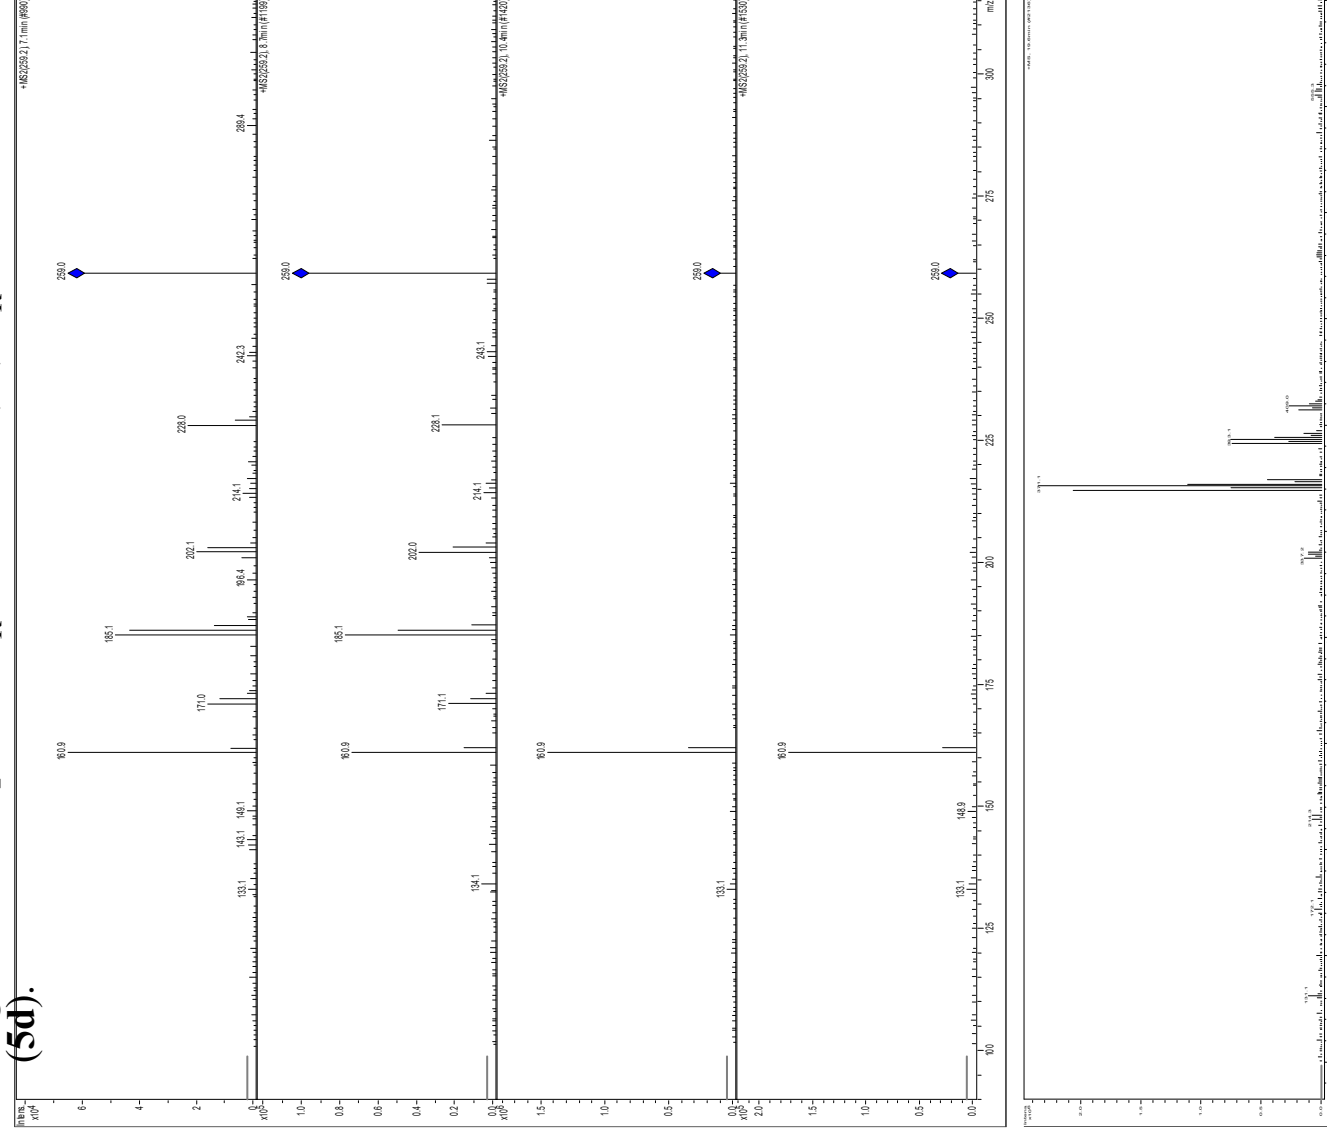

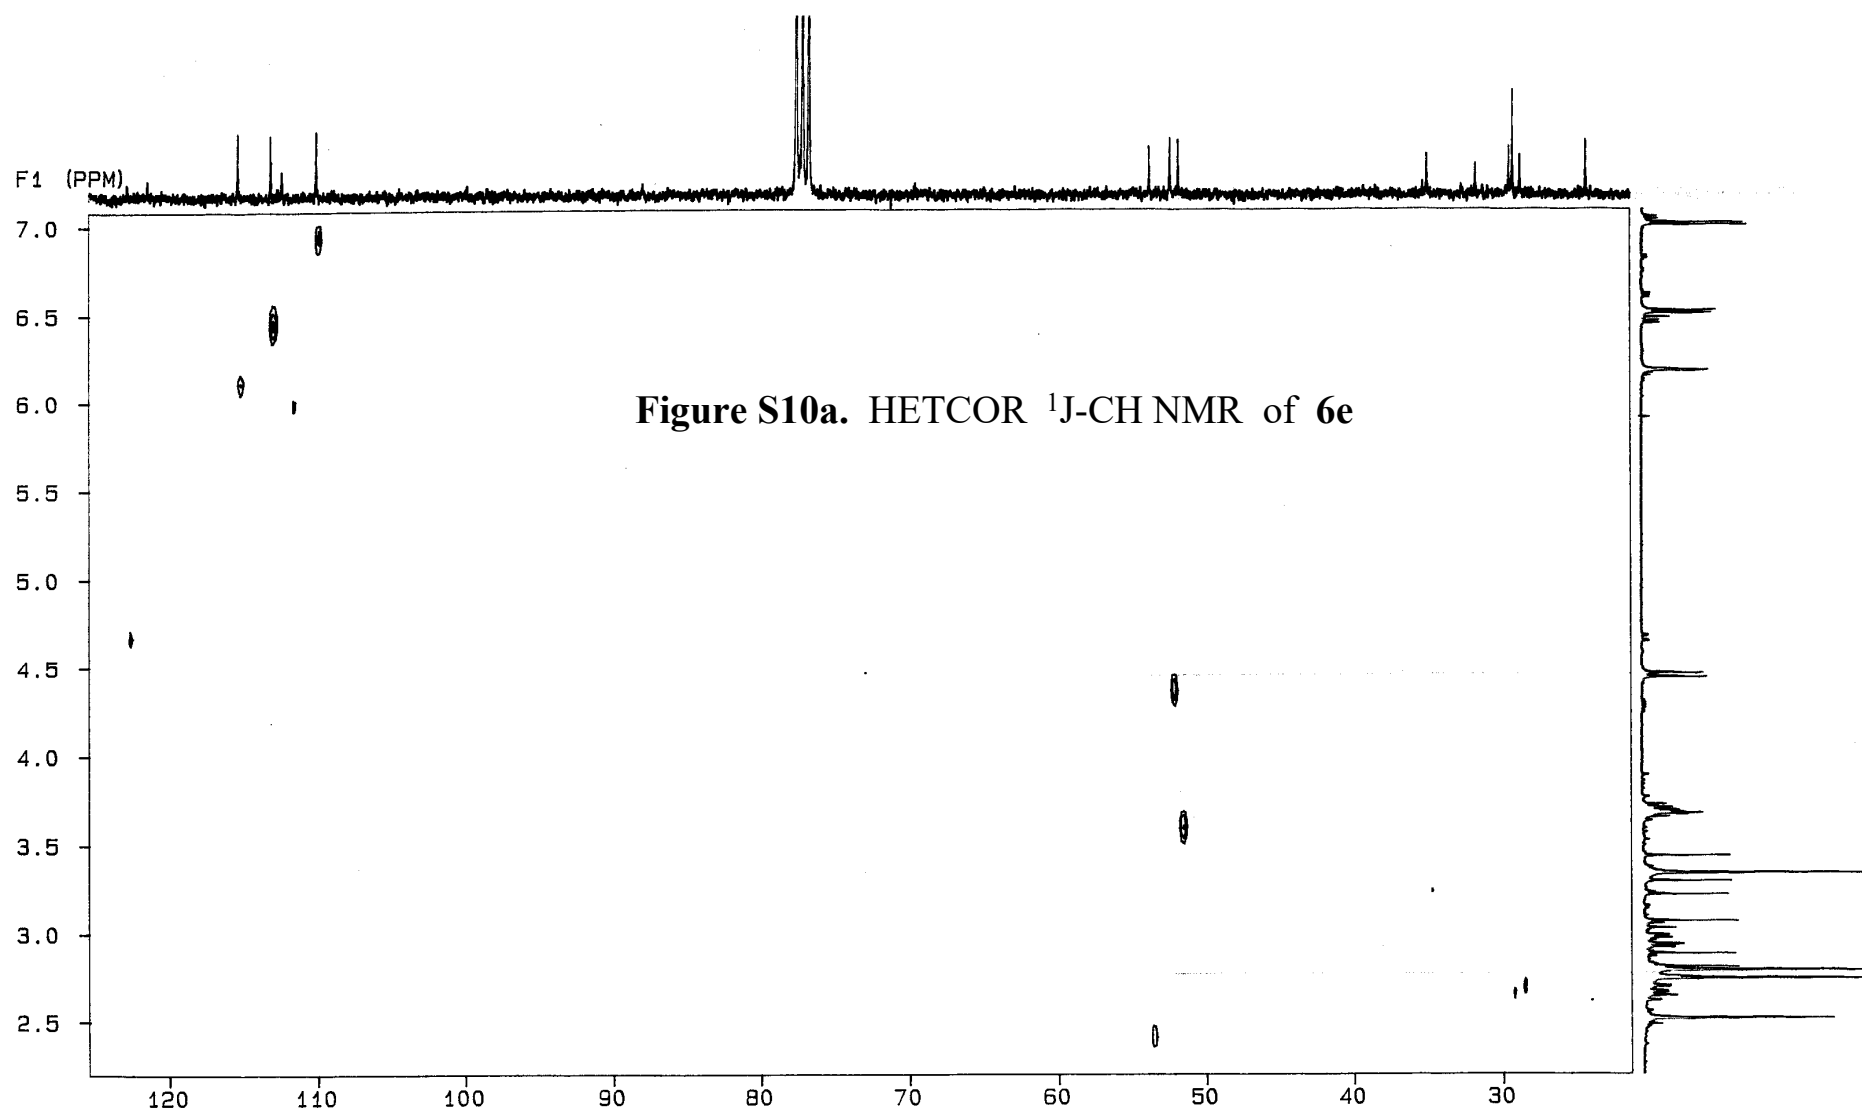

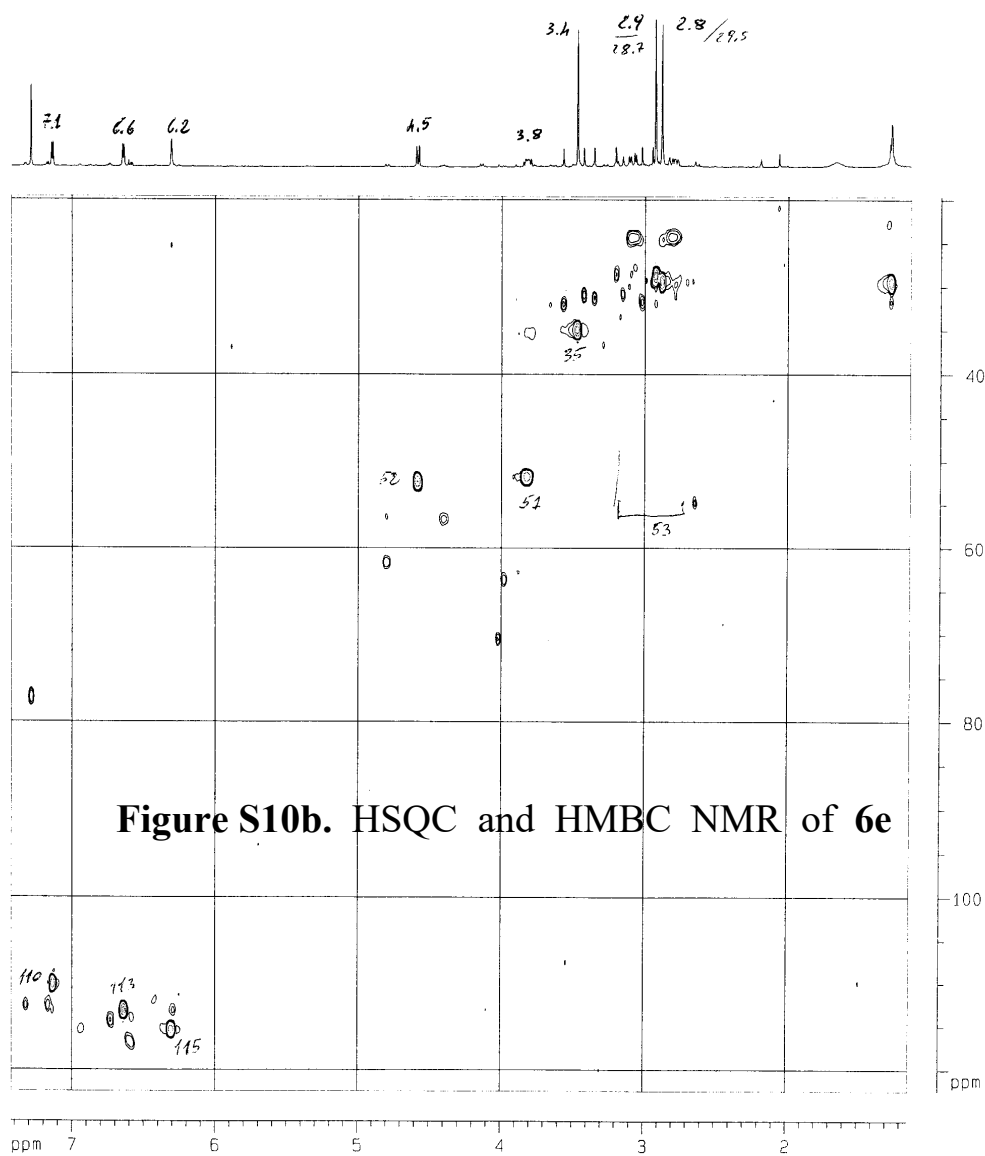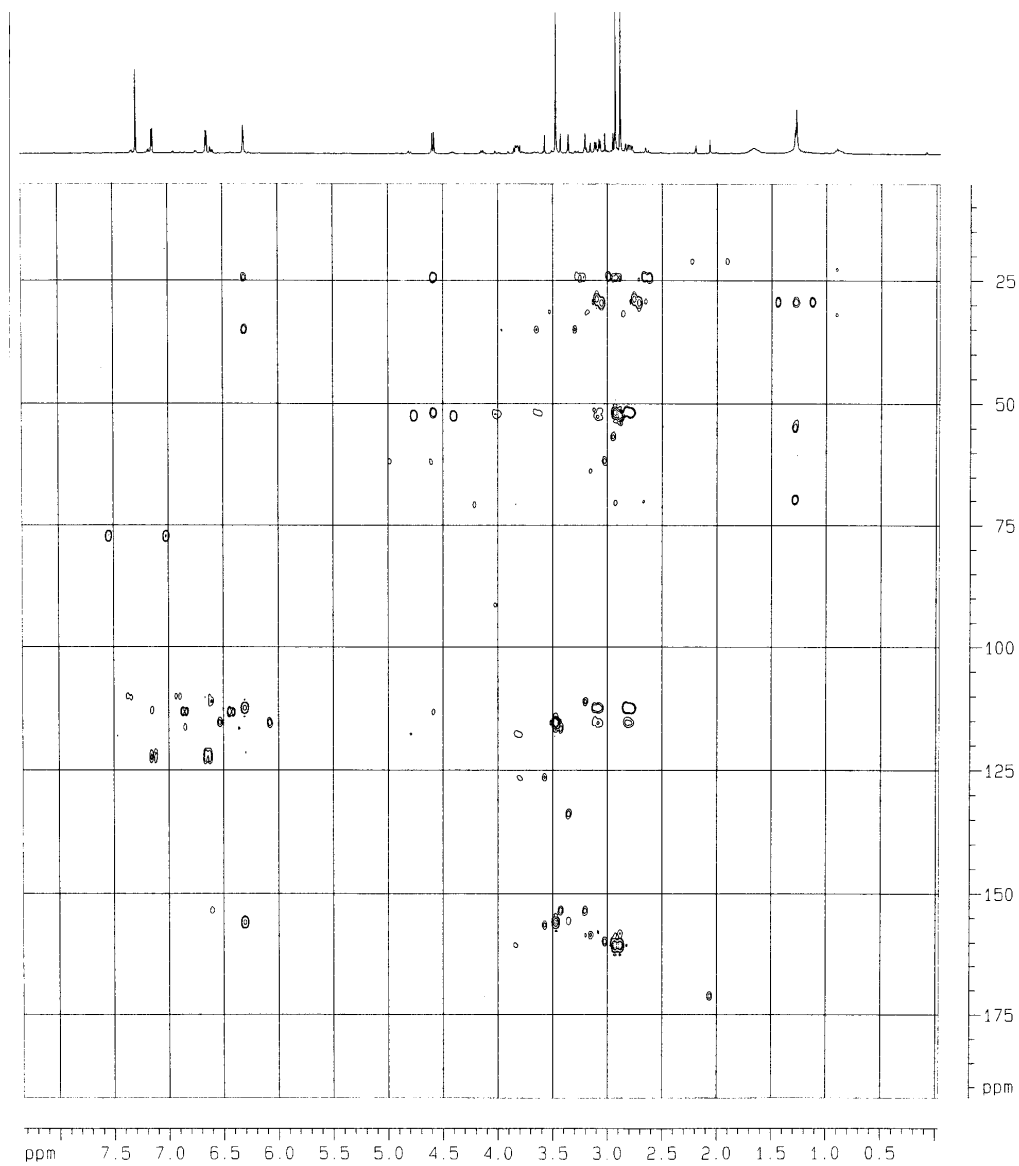

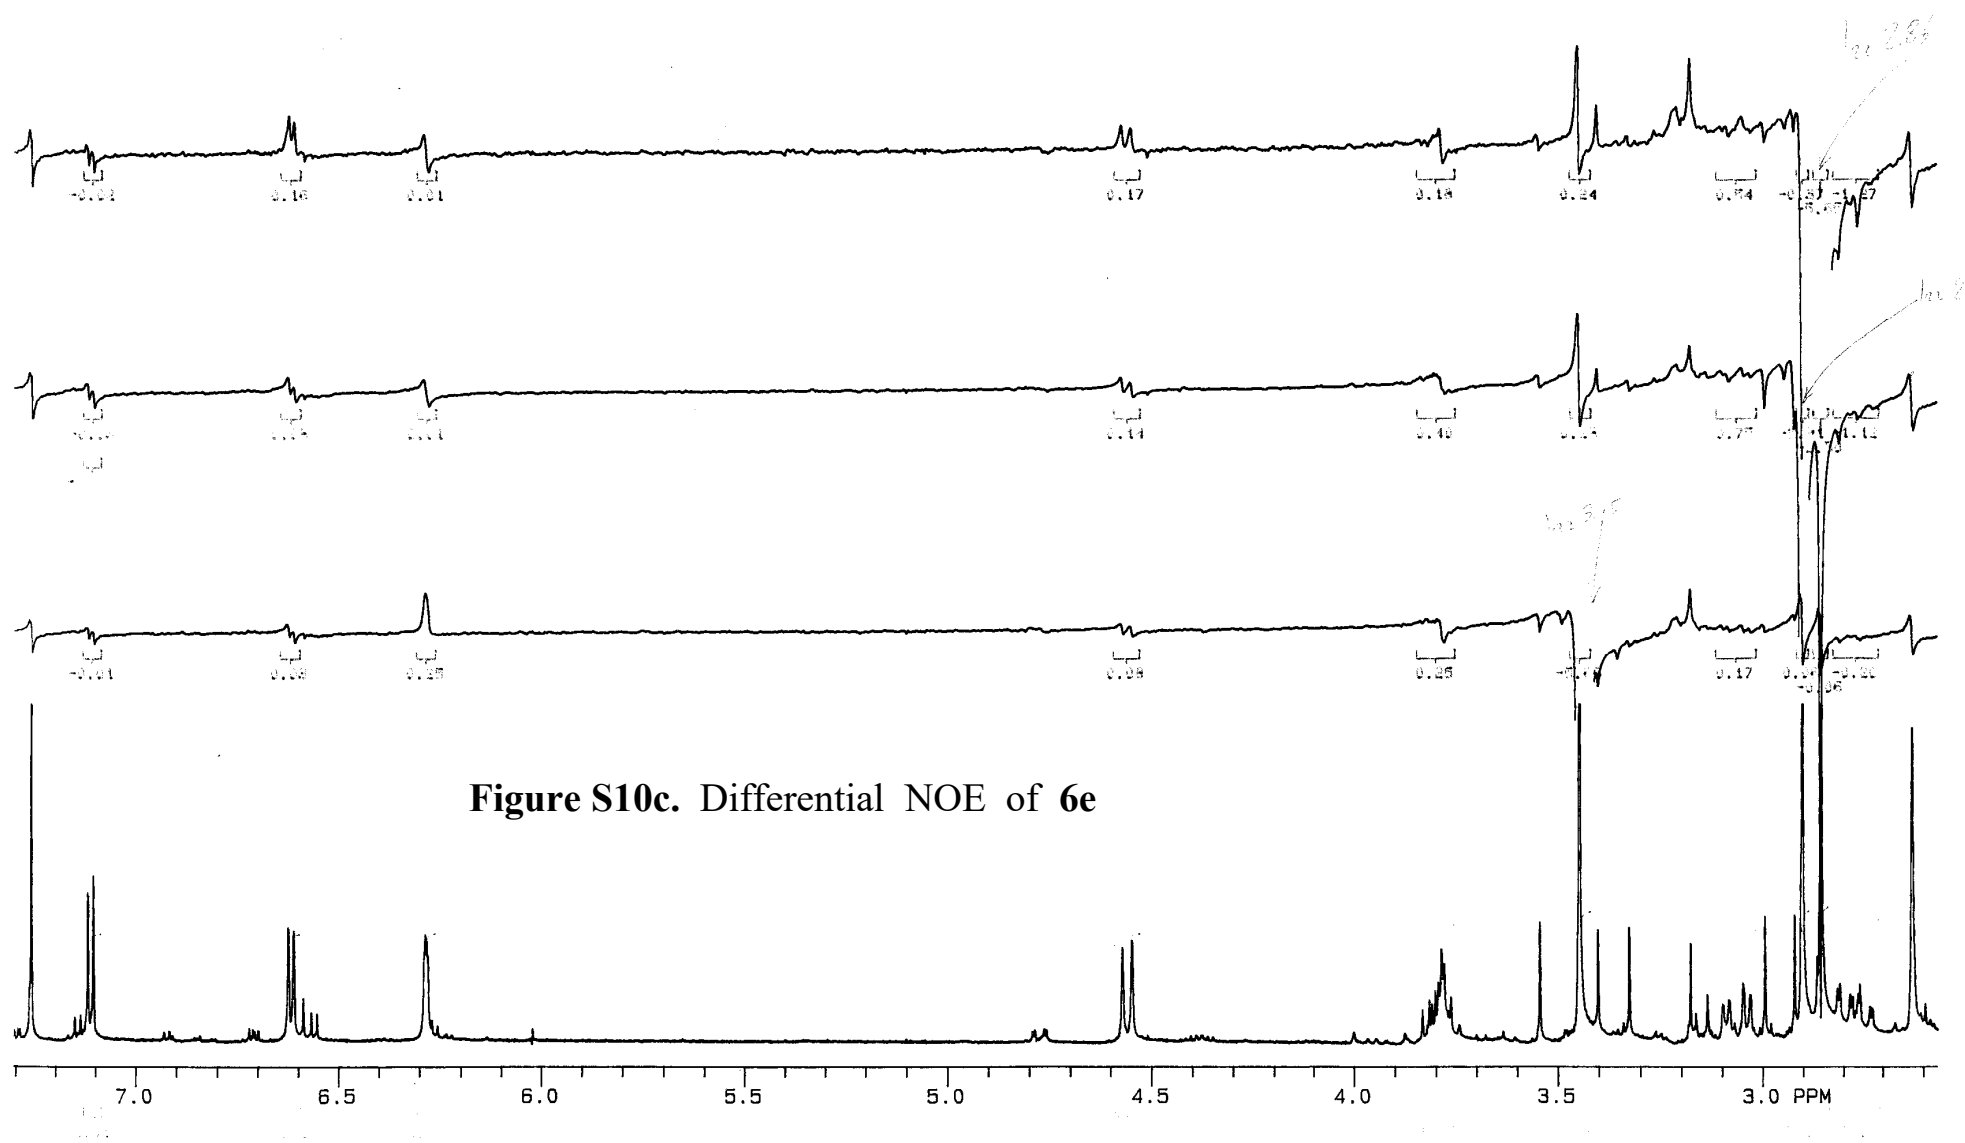

**Figure S10c.** Differential NOE of 6e

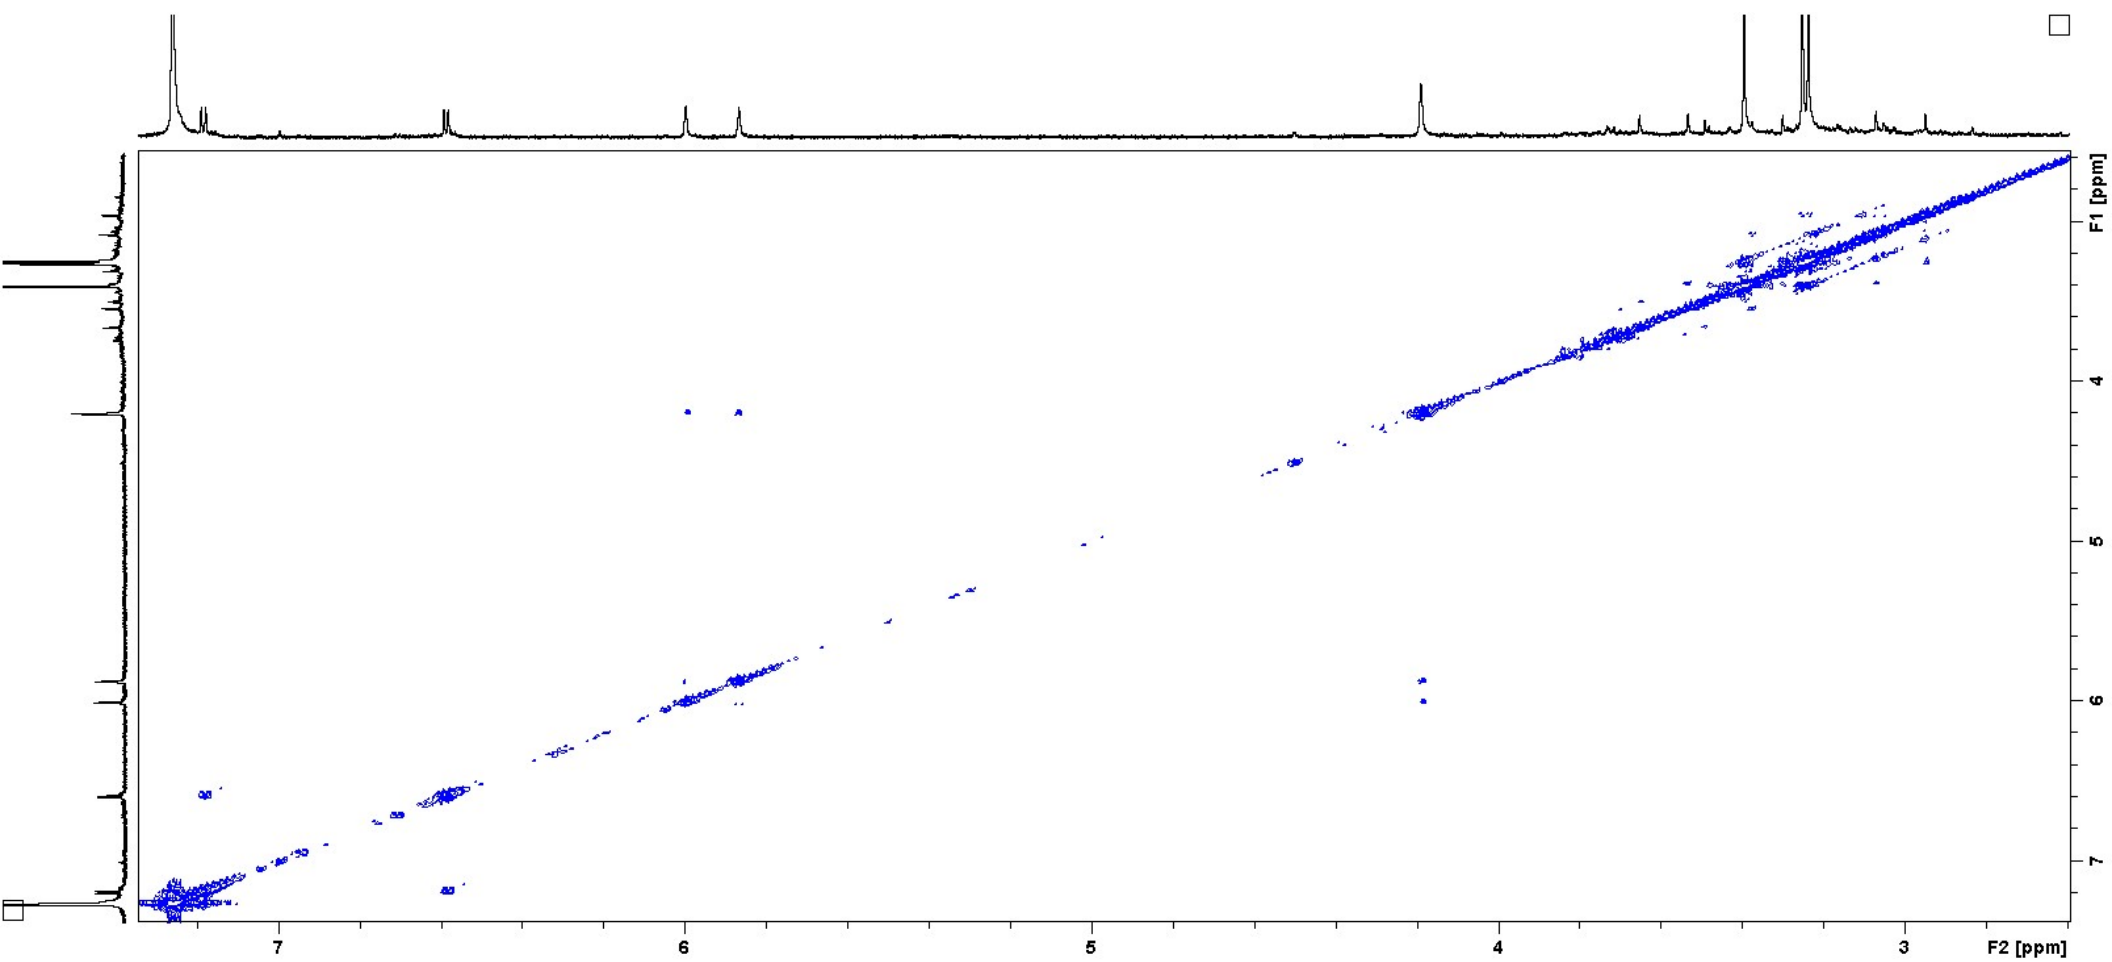

**Figure S10d.** – COSY spectrum of **4e**. See **S5g** for <sup>1</sup>H-NMR

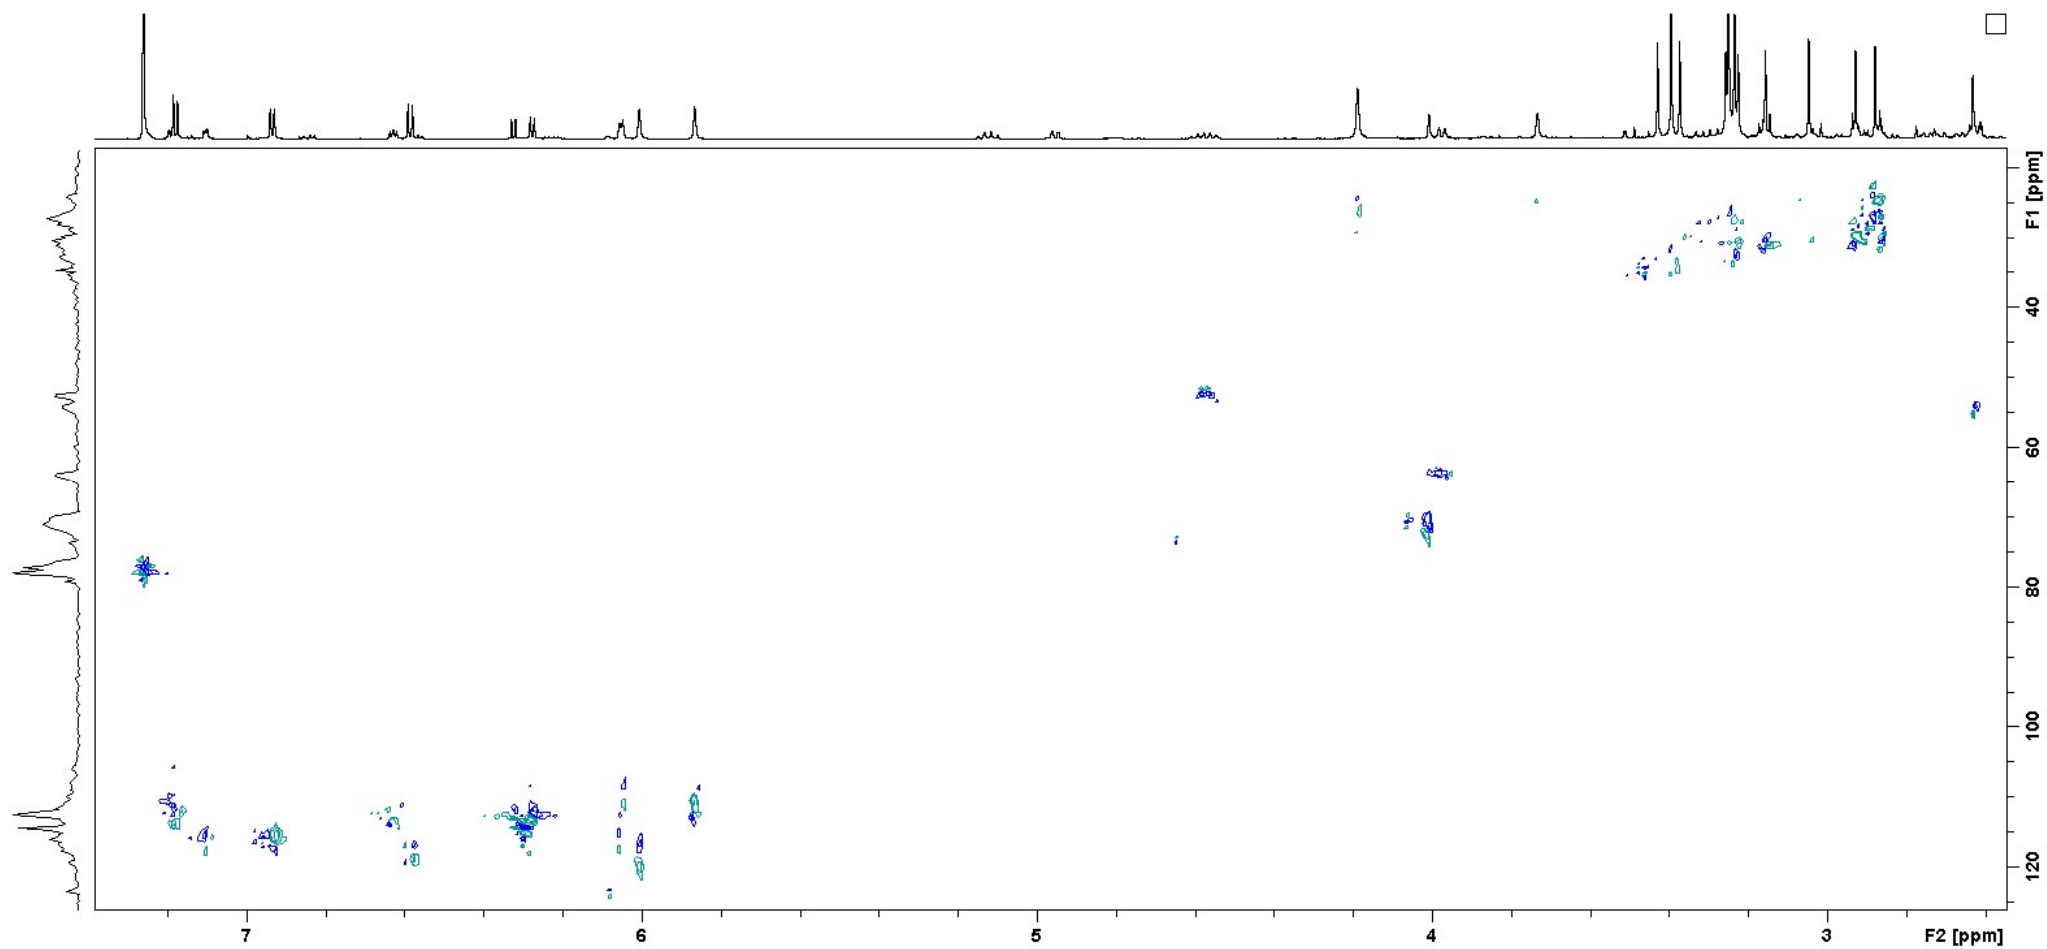

**Figure S10e.** – HSQC spectrum of **4e** (major component in the mixture).

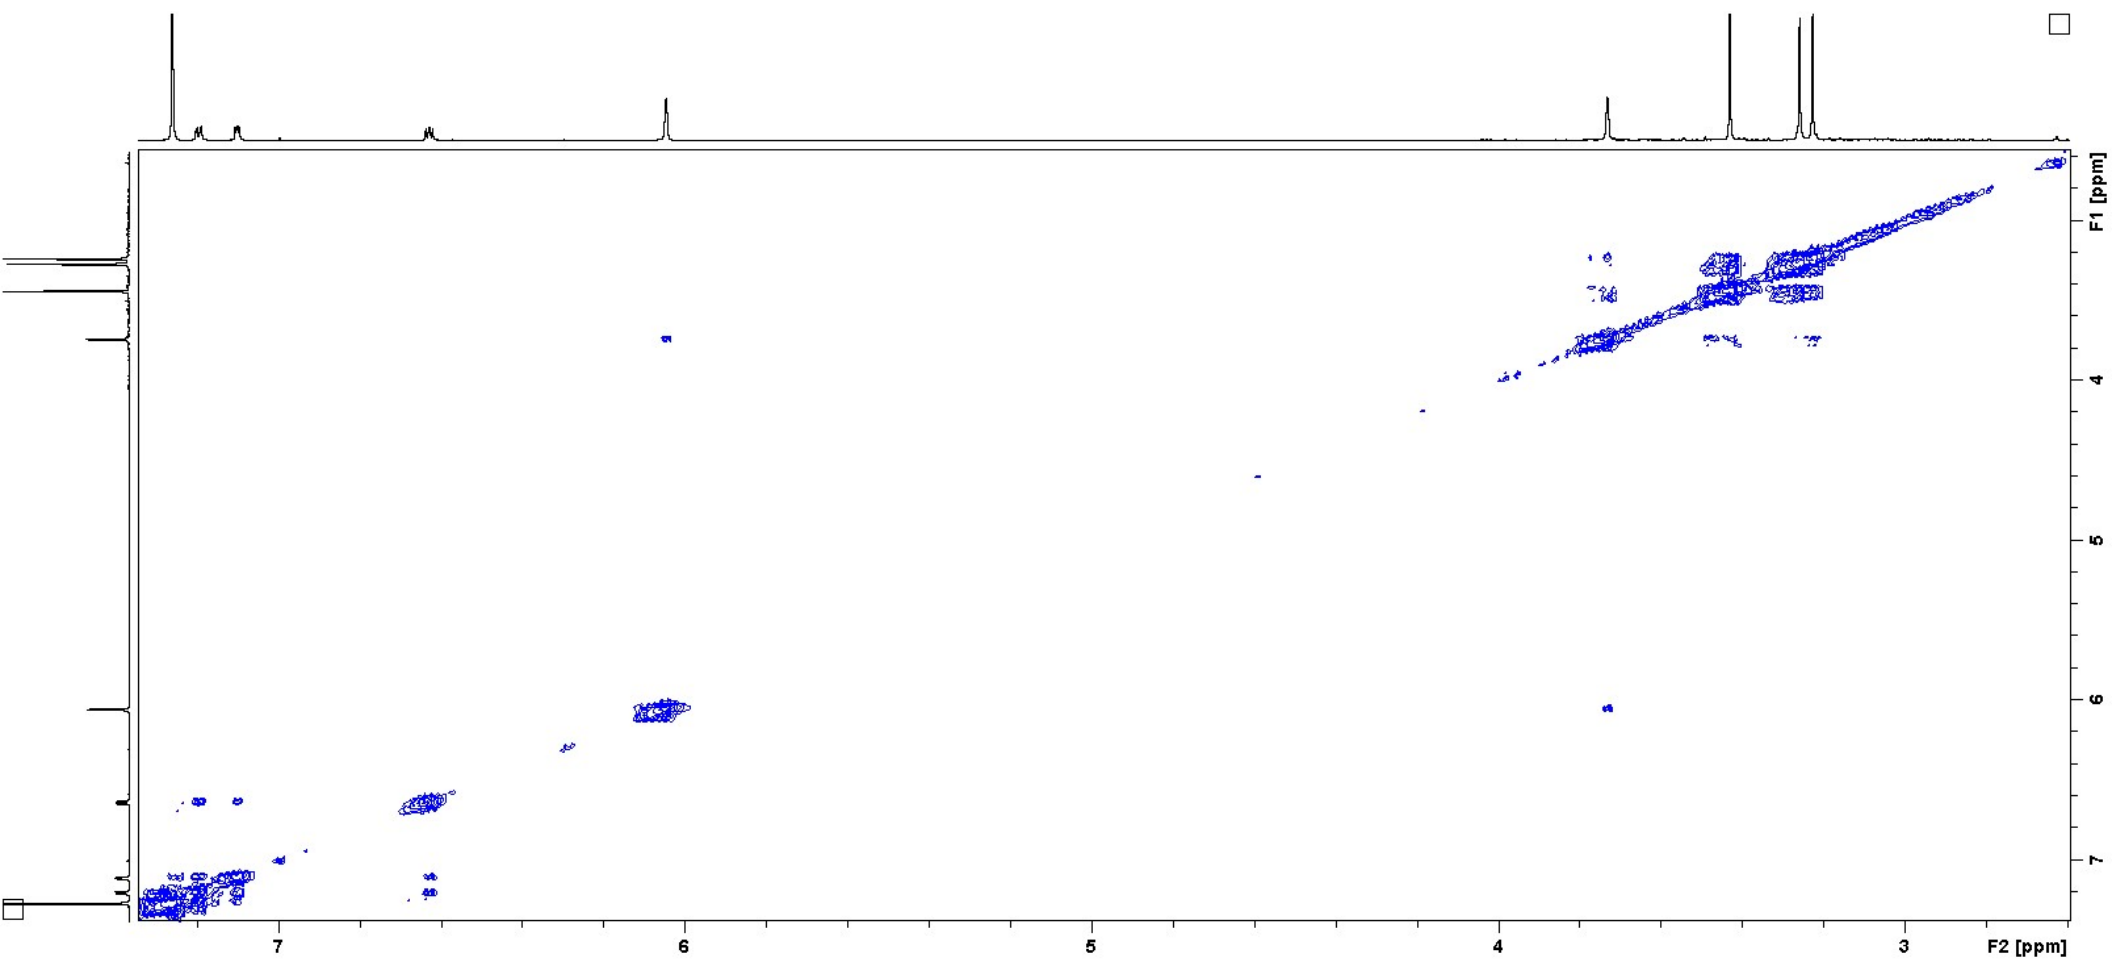

**Figure S10f.** – COSY spectrum of **5e**. See **S5h** for <sup>1</sup>H-NMR

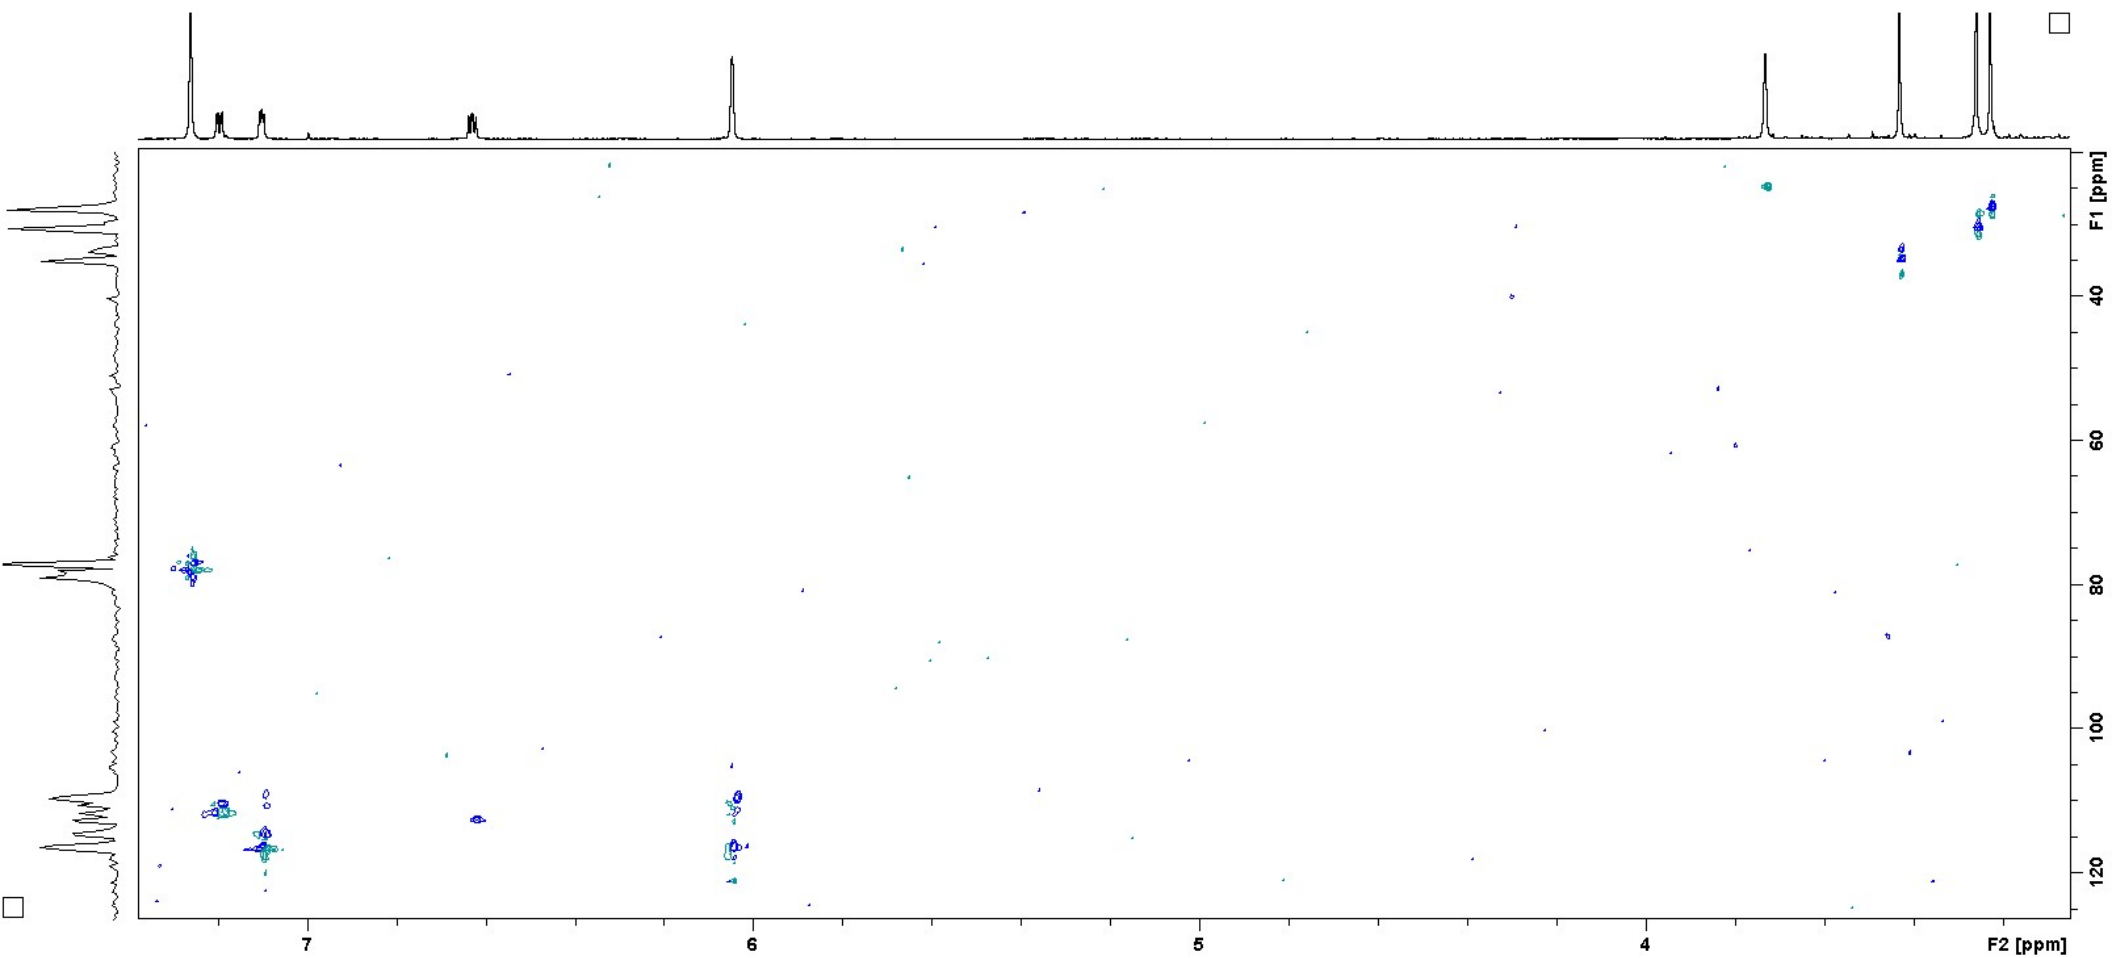

**Figure S10g.** – HSQC spectrum of **5e**.



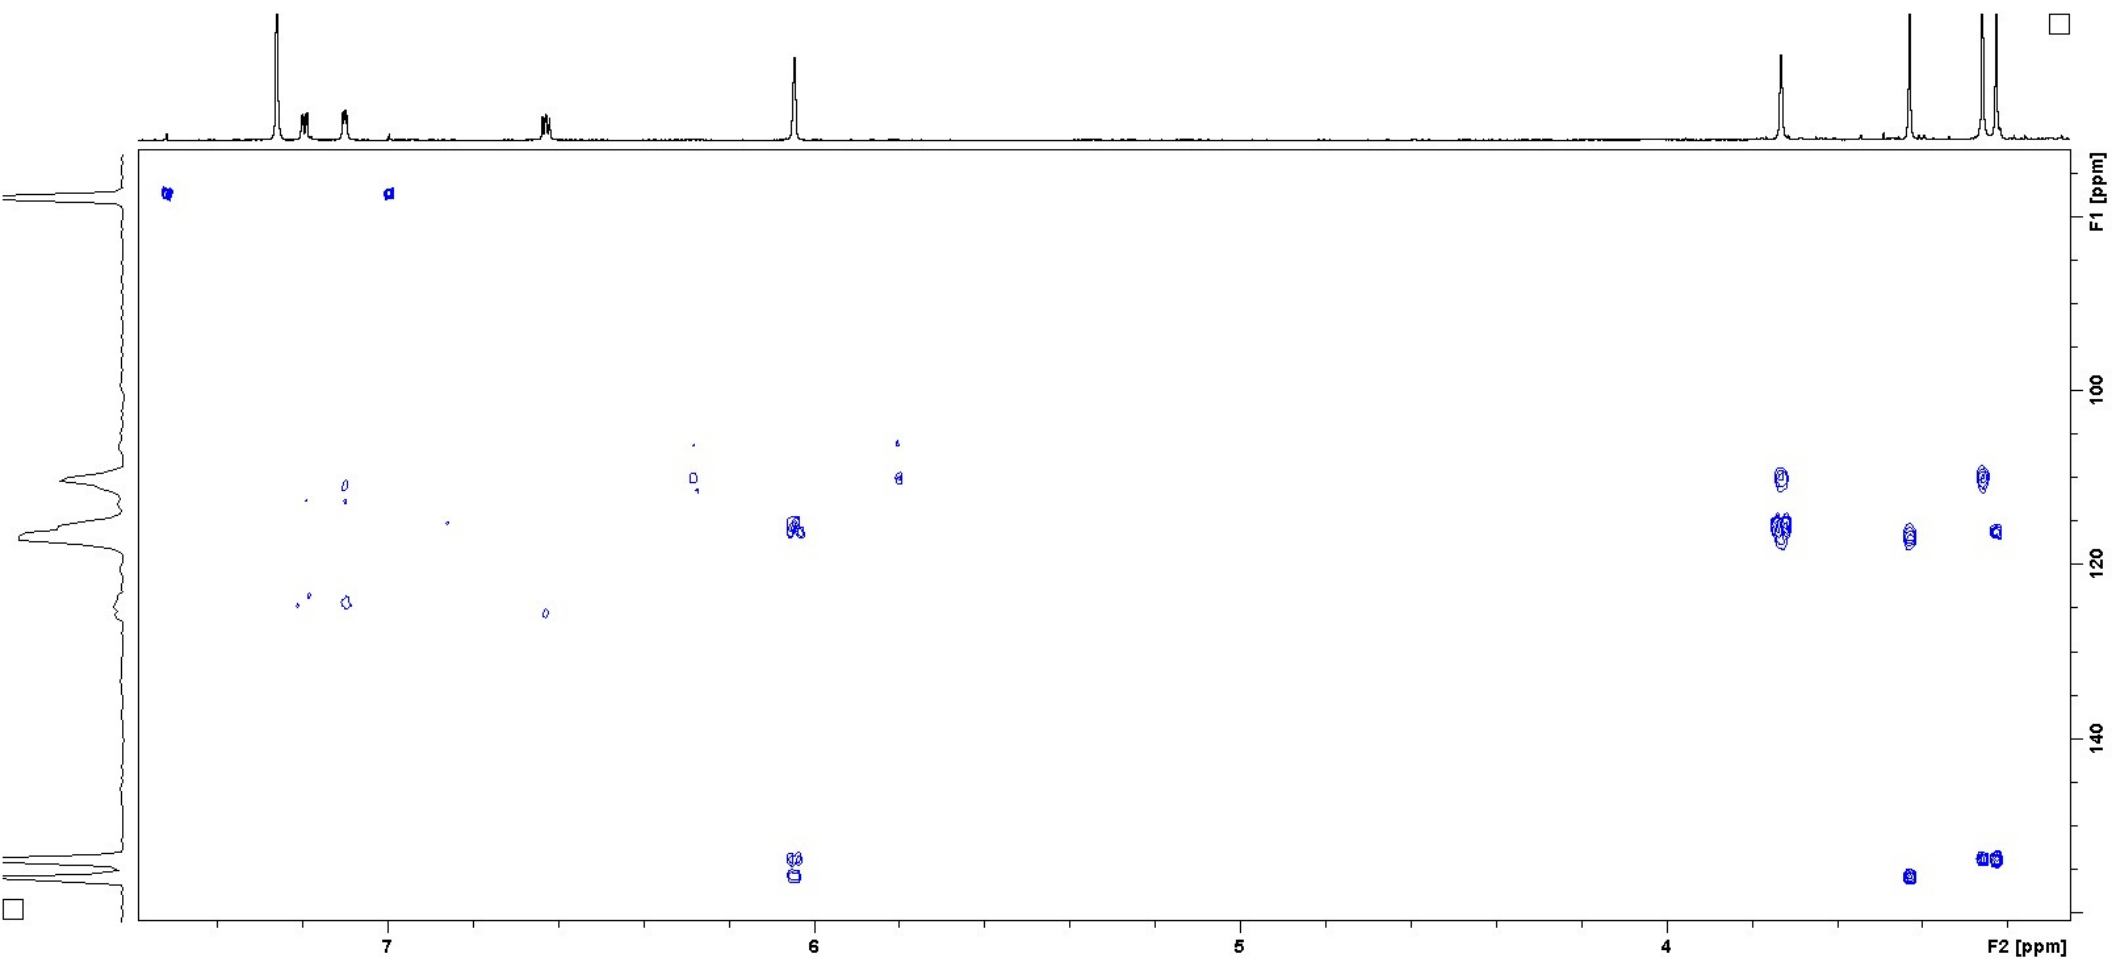

**Figure S10h.** – HMBC spectrum of **5e**.

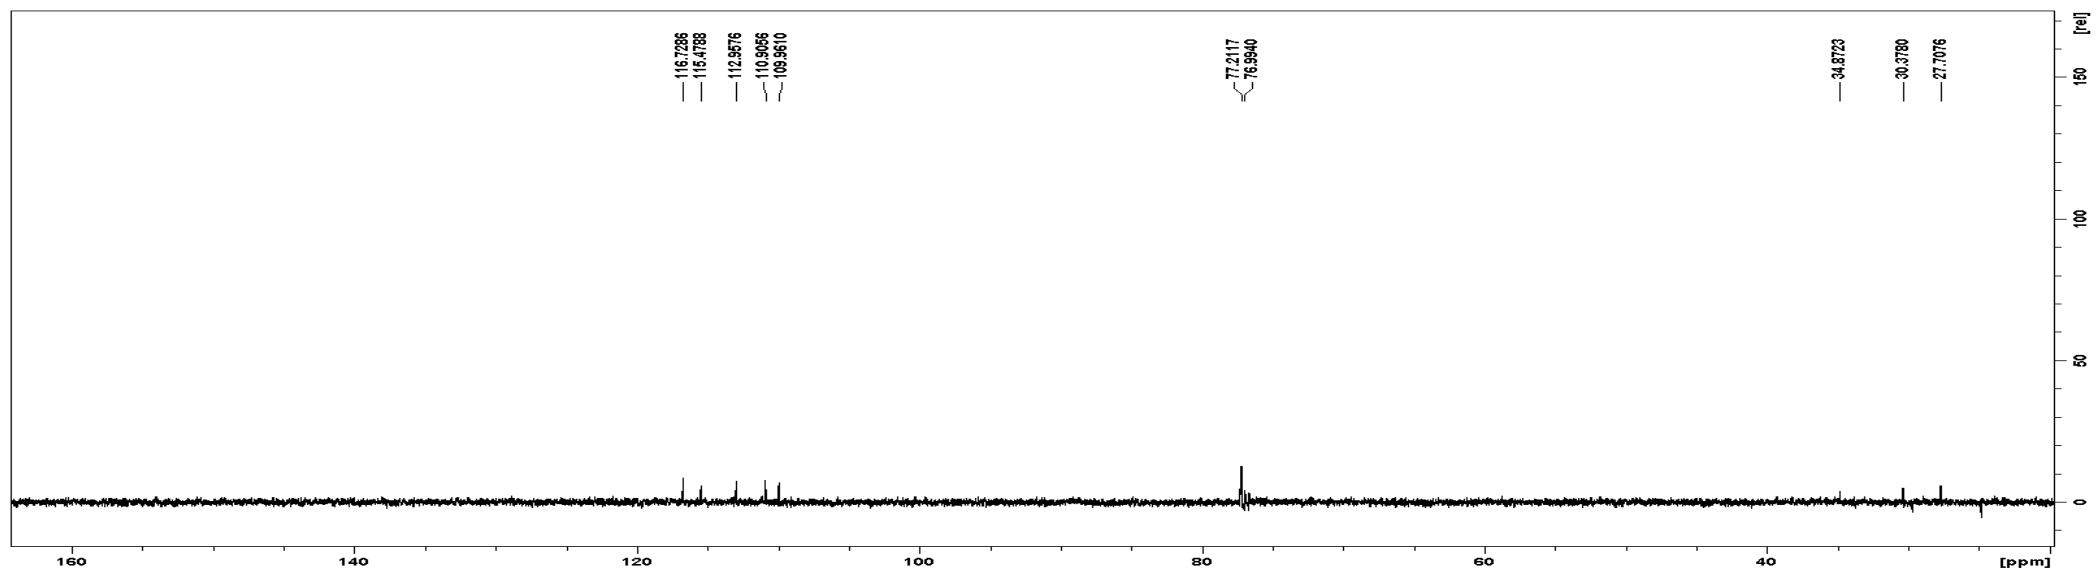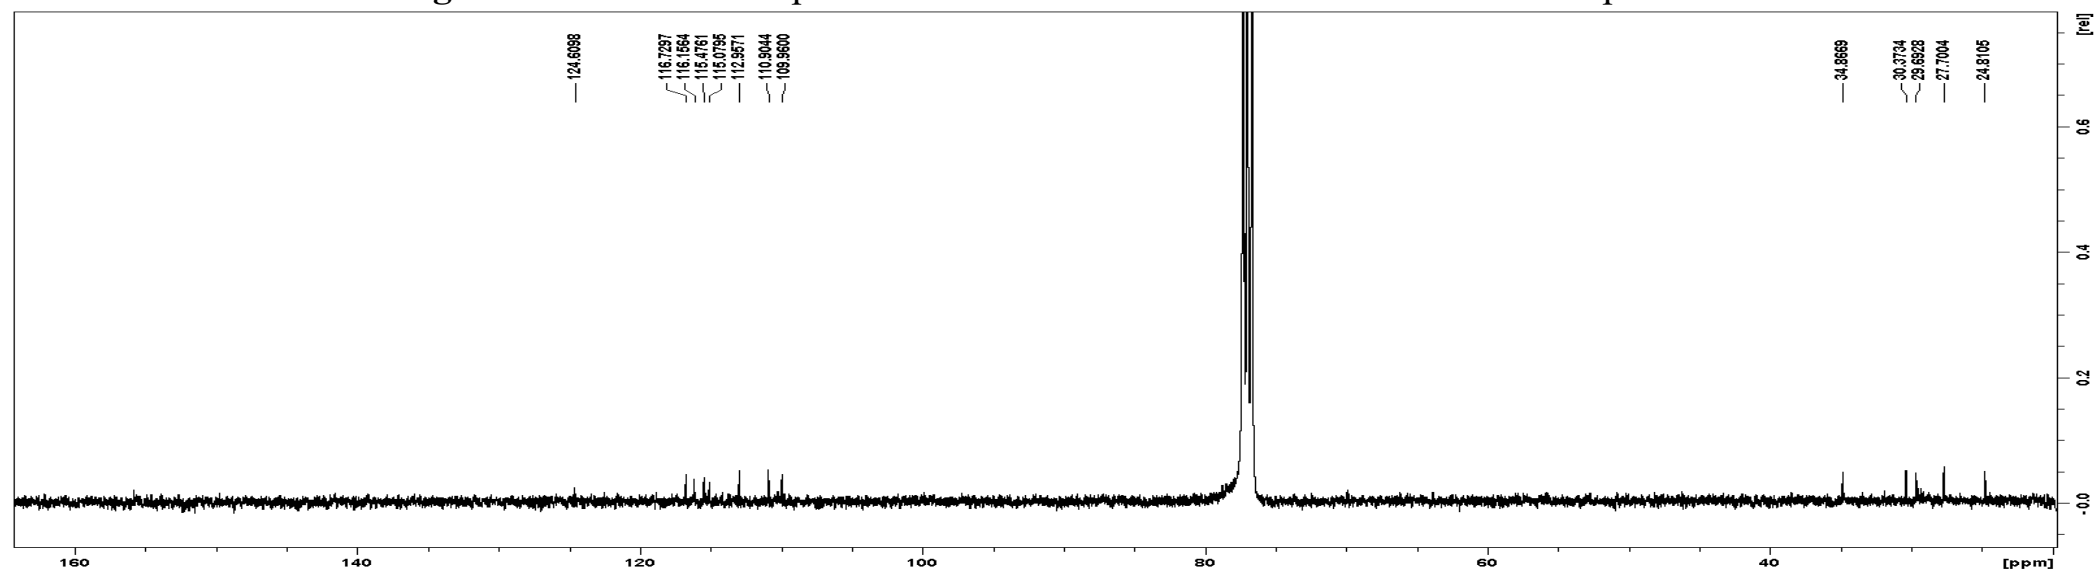

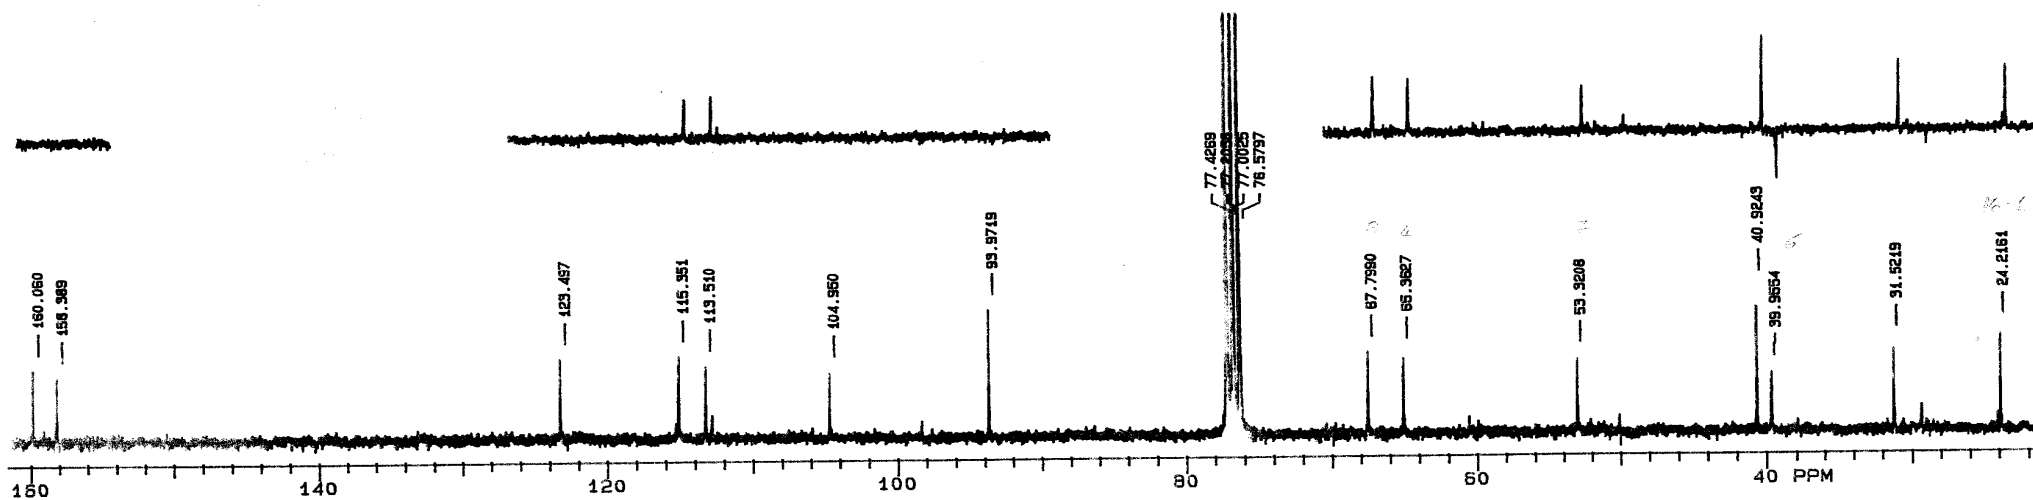

Figure S10j. -  $\uparrow$   $^{13}\text{C}$ -NMR and DEPT spectra of **1d**

$\downarrow$   $^{13}\text{C}$ -NMR and DEPT spectra of **2d**

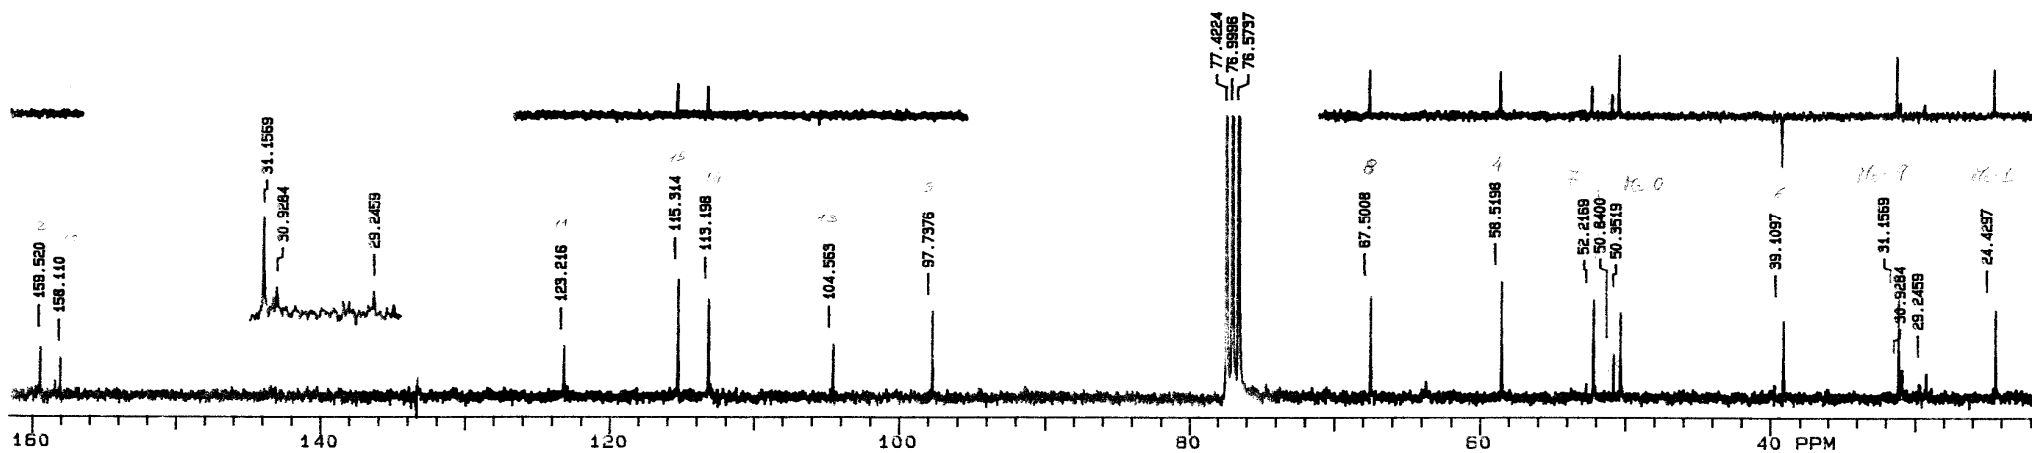

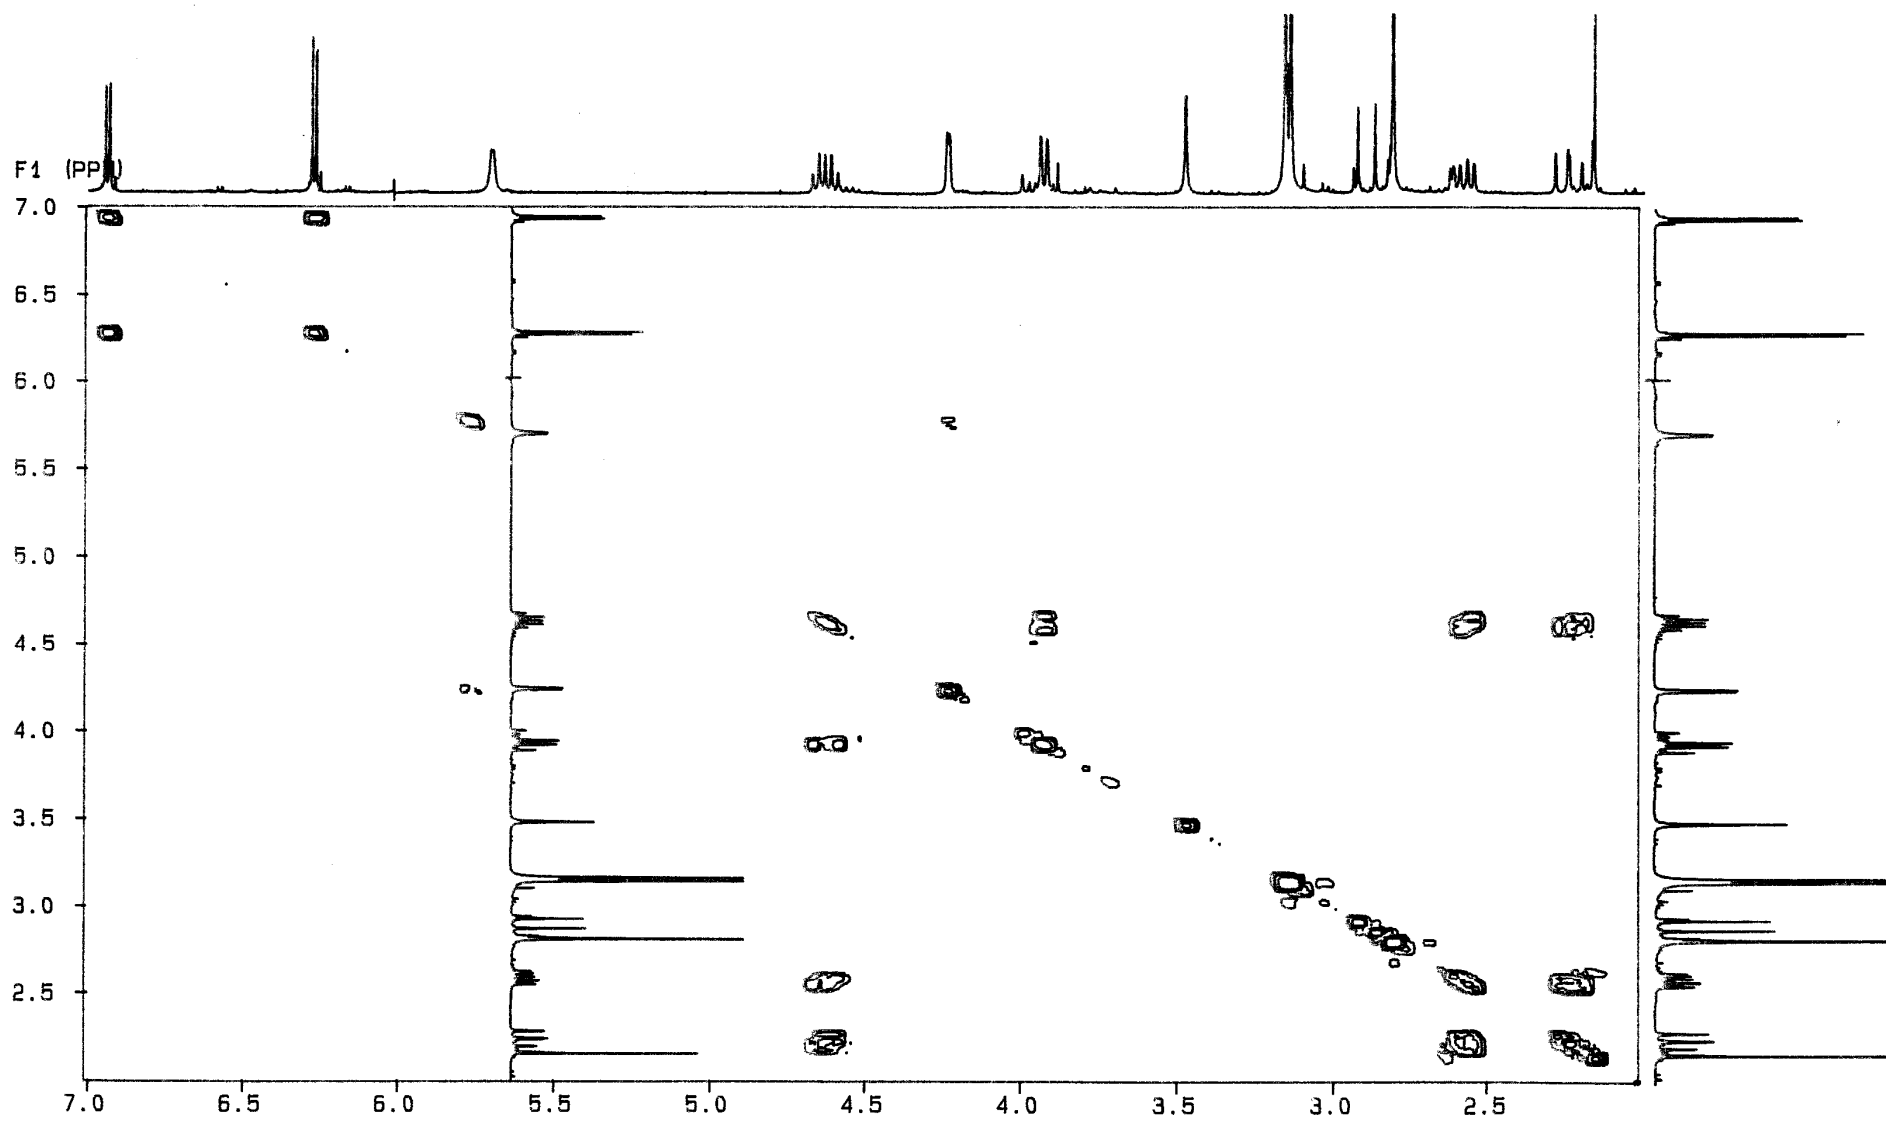

Figure S10k. – COSY spectrum of 2d. See 1f for <sup>1</sup>H-NMR

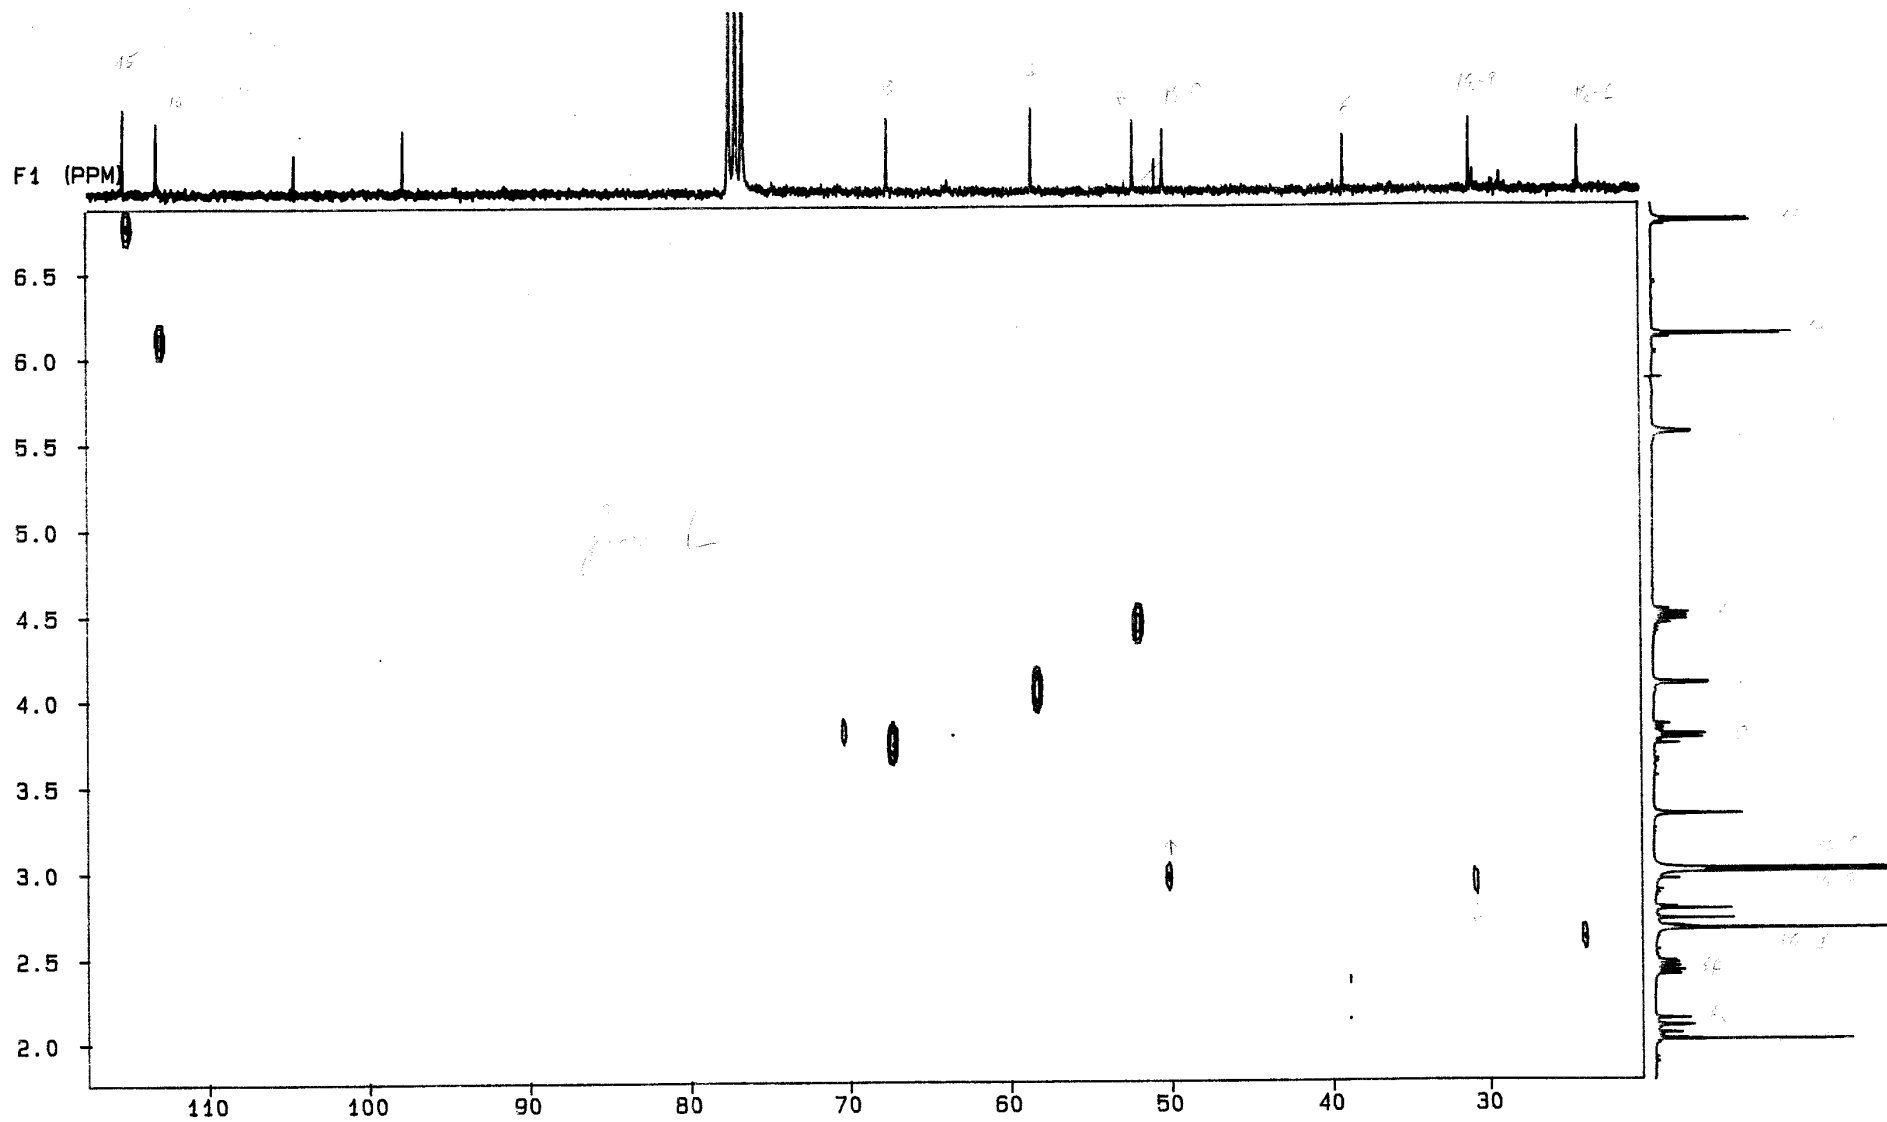

Figure S101. – HETCOR  $^1\text{J-CH}$  NMR spectrum of **2d**.

Sample-m3agh-pos\_OT #1-111 RT: 0.00-0.58 AV: 111 NL: 6.16E7  
T: FTMS + p ESI Full ms [100.0000-600.0000]

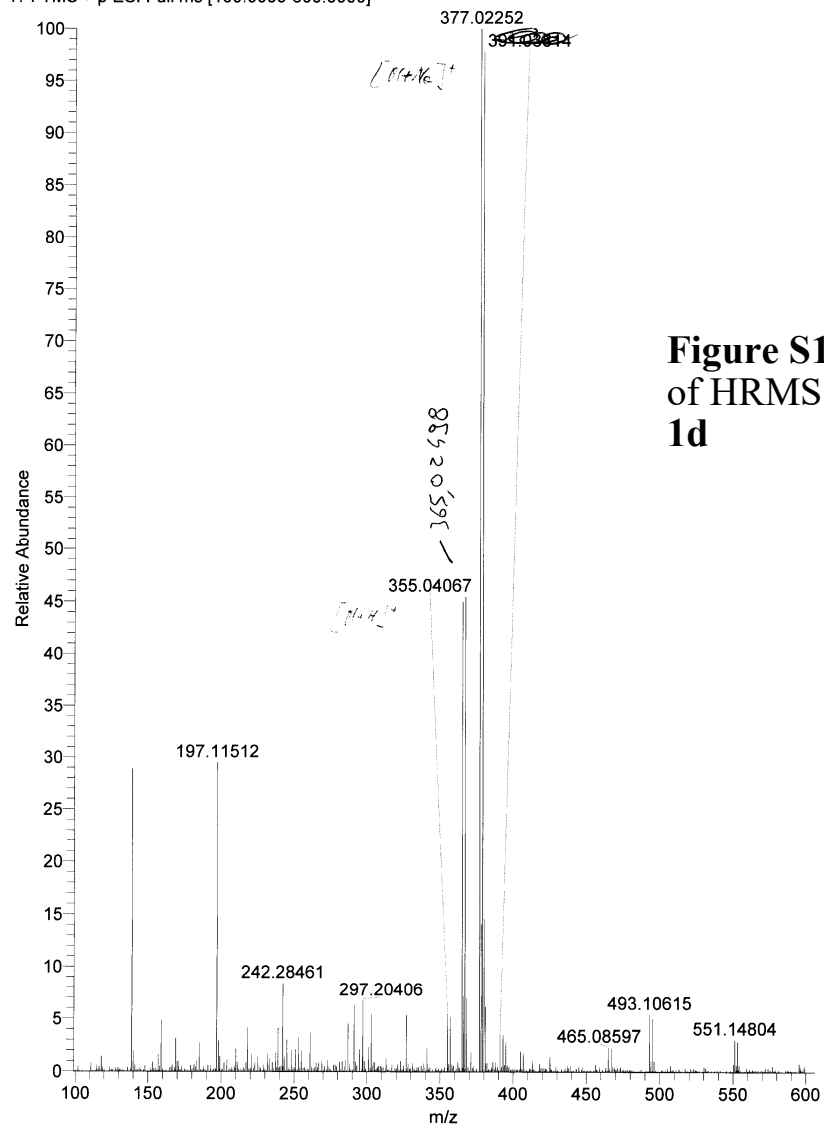

**Figure S10m. COPY  
of HRMS : 1m &  
1d**

Sample-m9agh-pos\_OT #1-109 RT: 0.00-0.56 AV: 109 NL: 1.46E7  
T: FTMS + p ESI Full ms [100.0000-600.0000]

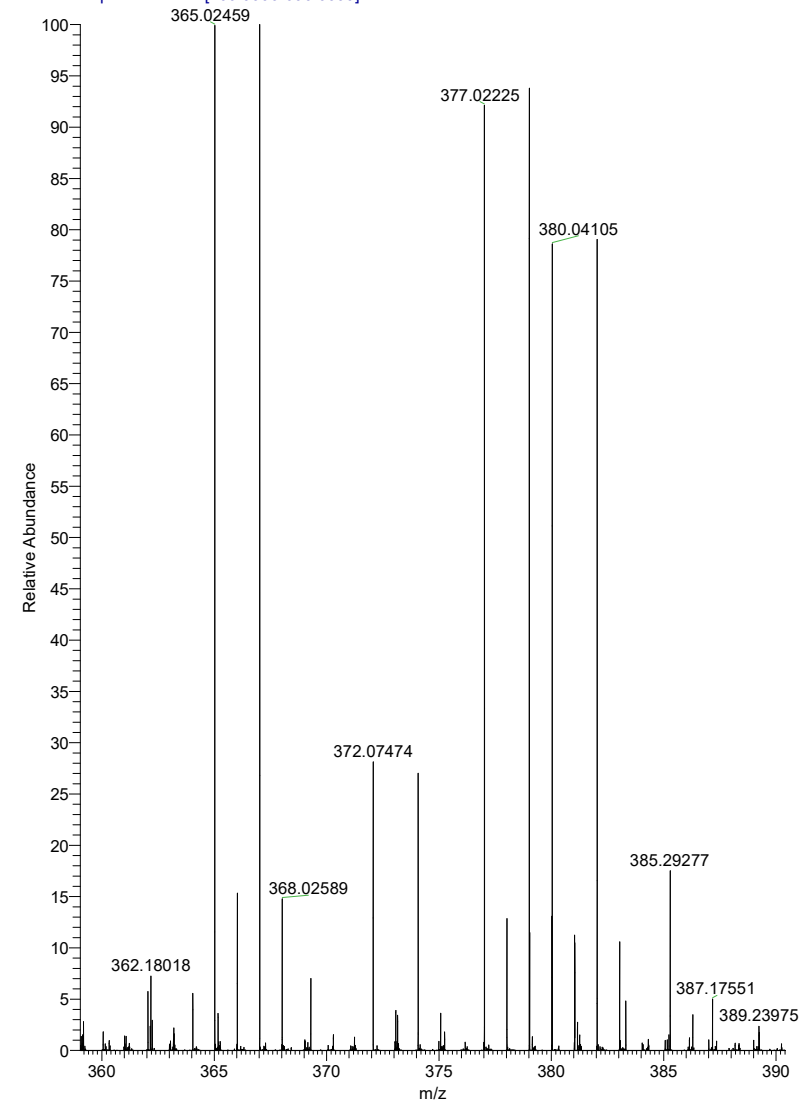

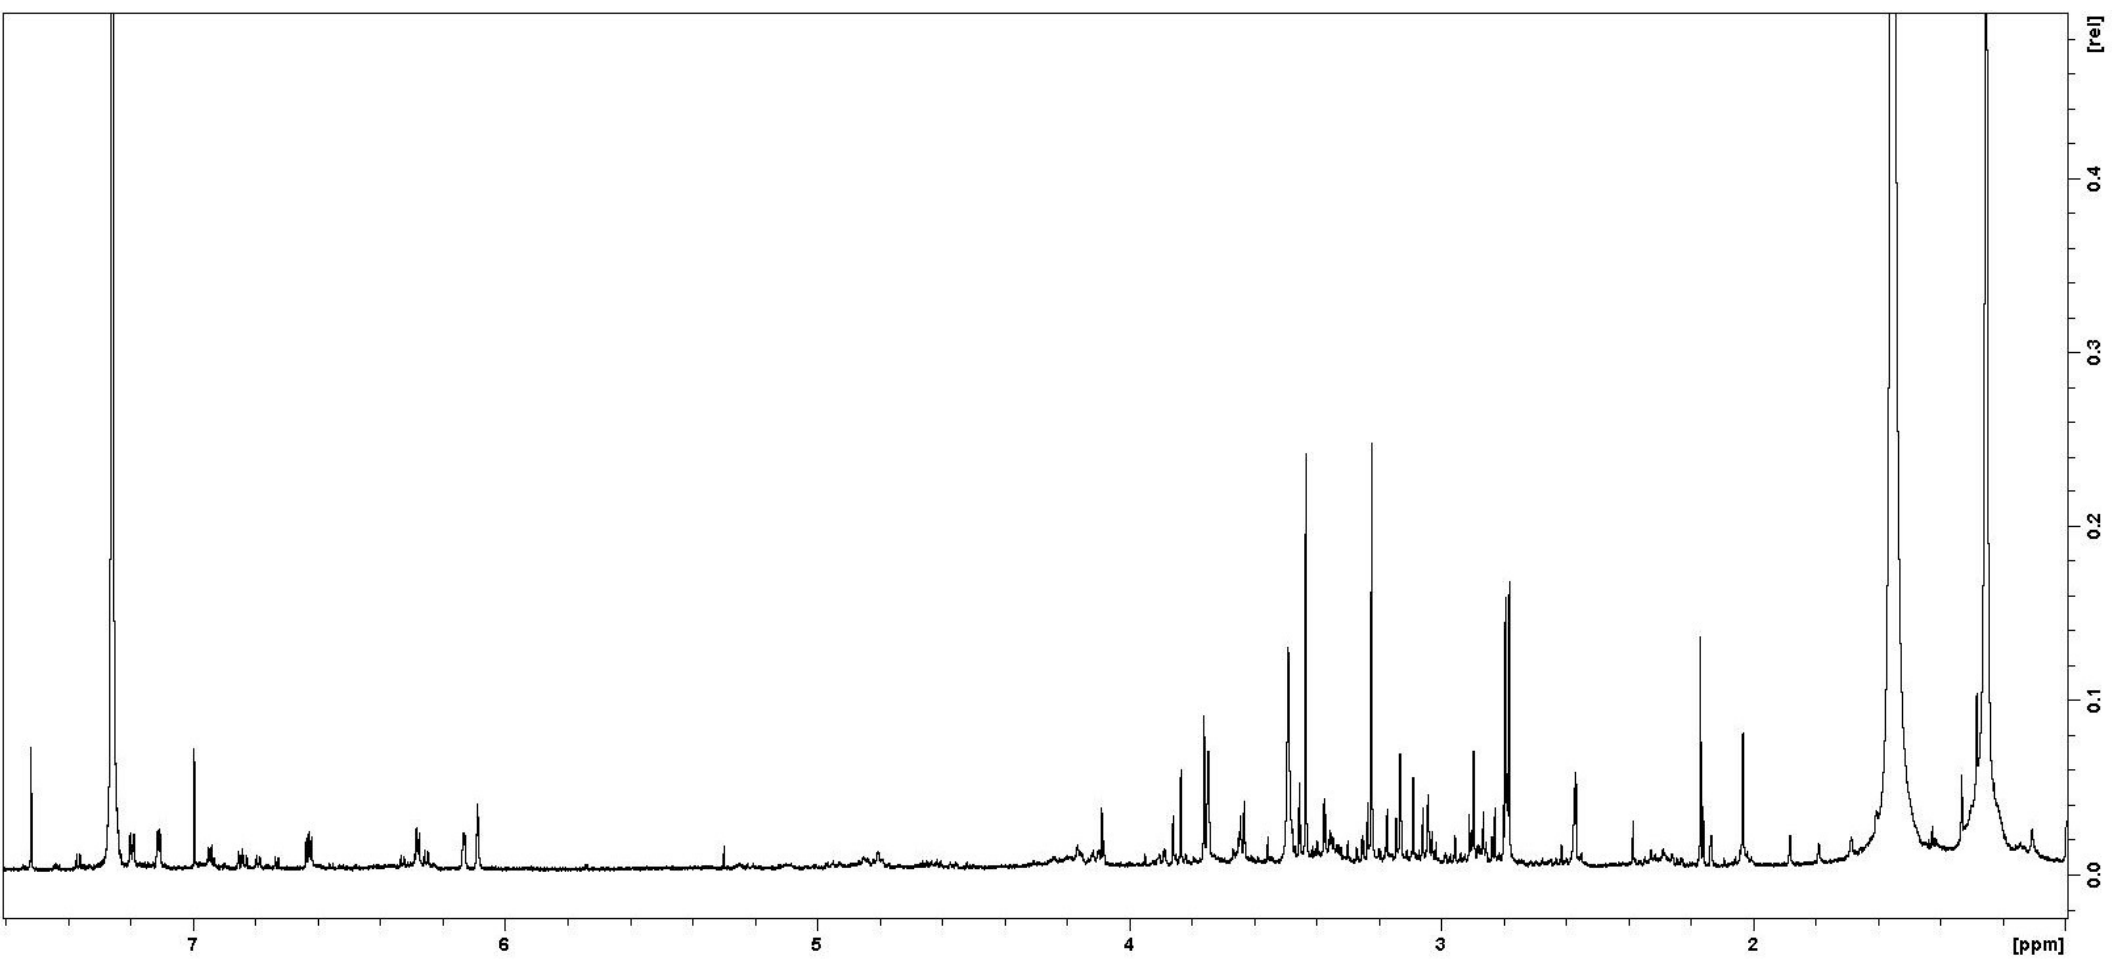

**Figure S10n.** – **1d** +  $\text{MsOH}$  in  $\text{CDCl}_3$   $65^\circ$ , 120' than A21  $\Rightarrow$  **5d**

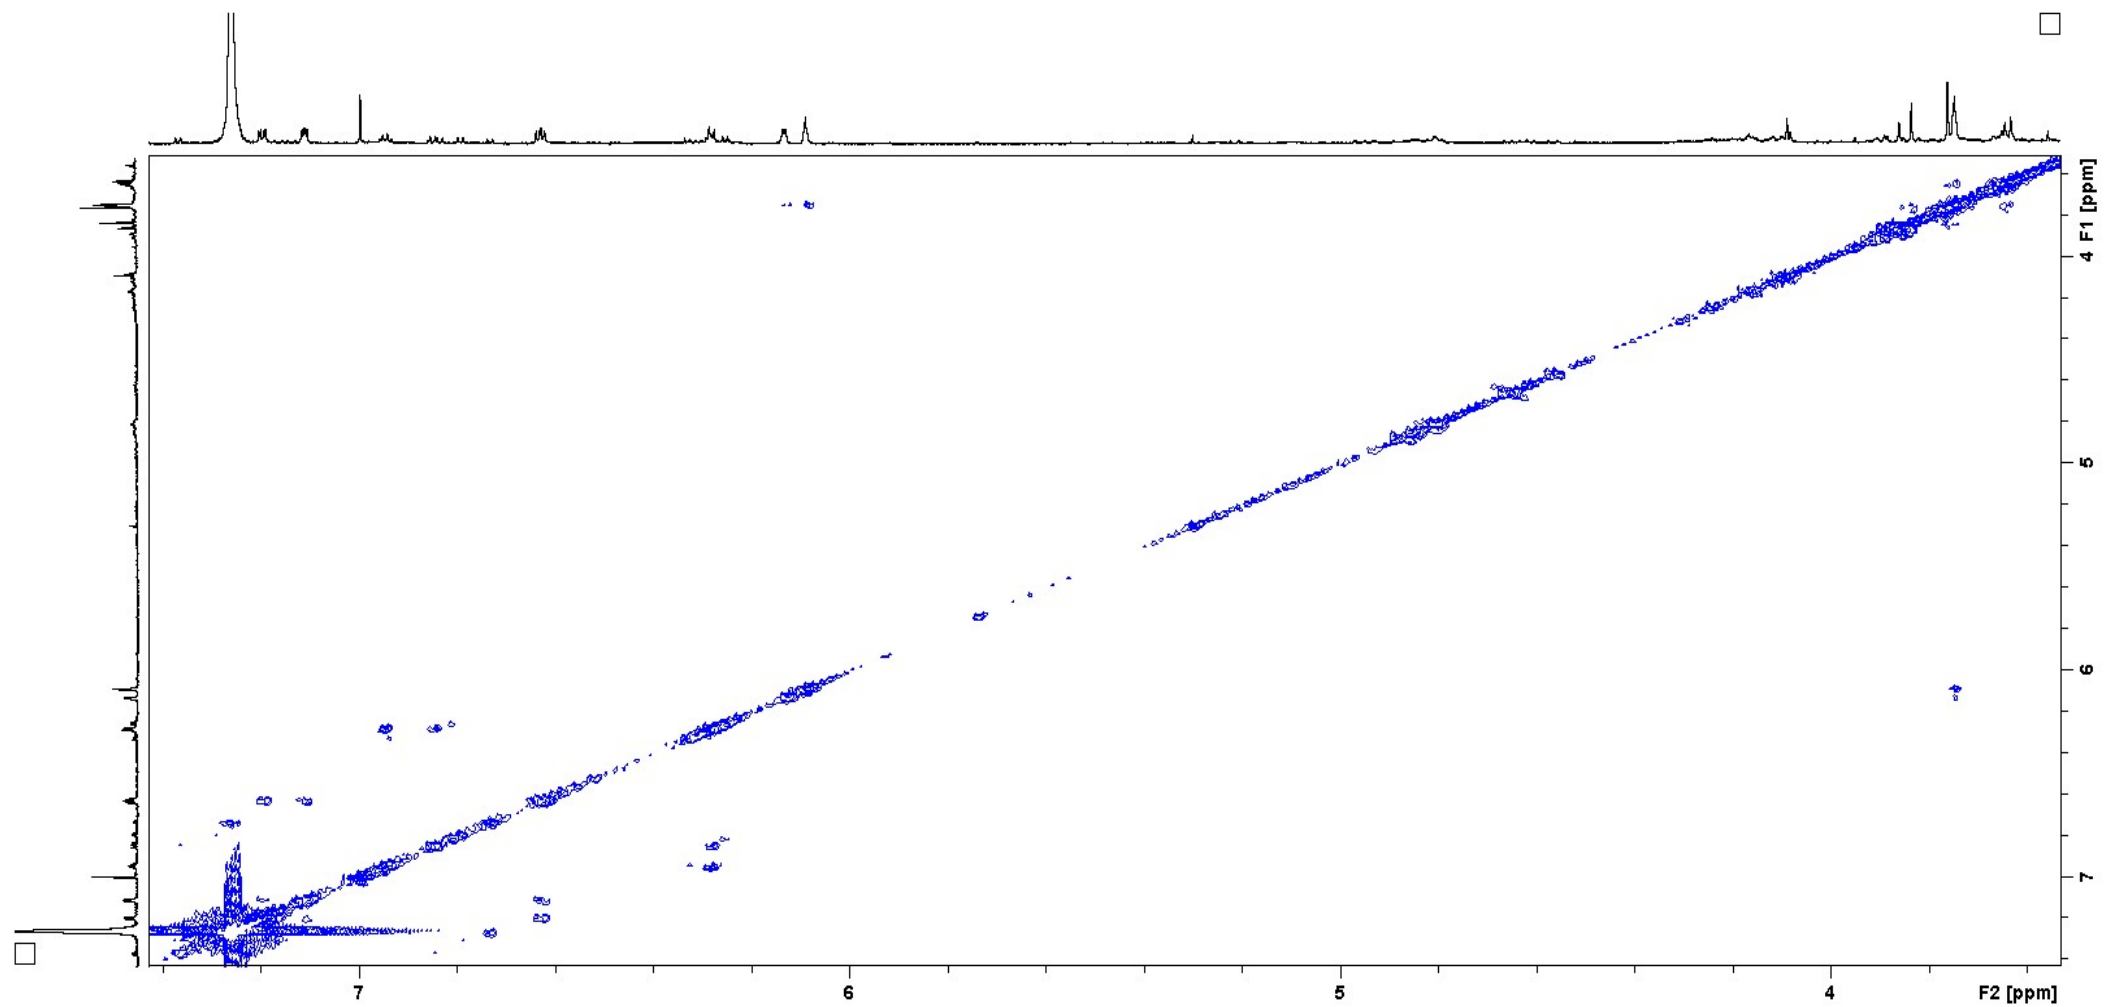

**Figure S10o.** – 5d – cosy
